# Supplementary material
Source: Research Square preprint supplement (doi:10.21203/rs.3.rs-9287633/v1)
Supplement: Supplementary file 2 [file 93730d6afb93a87d75692740.xlsx]

## Sheet: Figures 2a-2b
	CN	F	Cl	Br	H	Me	NH2	NHBu
2	0.42884	-0.51207	-1.53339	-1.74203	-2.54665	-4.61605	-4.62092	-5.43371
2.05	0.4235	-0.51681	-1.52589	-1.82422	-2.67433	-4.64174	-4.71113	-5.48998
2.1	0.40375	-0.53908	-1.54327	-1.90031	-2.78838	-4.66528	-4.79454	-5.58826
2.15	0.38522	-0.55982	-1.56435	-1.96738	-2.89064	-4.68488	-4.86646	-5.63948
2.2	0.37162	-0.58106	-1.57817	-2.03759	-2.98287	-4.70605	-4.93559	-5.69974
2.25	0.35706	-0.59663	-1.59203	-2.08644	-3.06456	-4.72225	-4.99614	-5.75455
2.3	0.34622	-0.61613	-1.60576	-2.14138	-3.13642	-4.73865	-5.05423	-5.80247
2.35	0.33006	-0.63375	-1.61738	-2.18845	-3.20909	-4.75551	-5.11231	-5.8409
2.4	0.31767	-0.64776	-1.62892	-2.23813	-3.26406	-4.76754	-5.15758	-5.87508
2.45	0.30863	-0.66215	-1.63886	-2.27131	-3.32008	-4.77964	-5.20861	-5.91755
2.5	0.29645	-0.67455	-1.64615	-2.31371	-3.36933	-4.7902	-5.24996	-5.96711
2.55	0.28869	-0.6865	-1.66058	-2.34888	-3.41417	-4.79975	-5.28741	-5.99906
2.6	0.28198	-0.69859	-1.66265	-2.37716	-3.45122	-4.80941	-5.32552	-6.0245
2.65	0.27289	-0.70827	-1.66969	-2.40319	-3.48962	-4.81874	-5.35438	-6.06681
2.7	0.26359	-0.71893	-1.67699	-2.43213	-3.52317	-4.82532	-5.3833	-6.09544
2.75	0.25656	-0.72674	-1.68228	-2.45853	-3.55307	-4.83448	-5.41487	-6.12019
2.8	0.25165	-0.73488	-1.68842	-2.4797	-3.58354	-4.84034	-5.43916	-6.15373
2.85	0.24567	-0.74341	-1.68935	-2.50355	-3.60966	-4.84642	-5.46834	-6.17182
2.9	0.236	-0.7524	-1.70176	-2.51802	-3.63008	-4.85118	-5.49048	-6.2026
2.95	0.23249	-0.75877	-1.70292	-2.53864	-3.65257	-4.85785	-5.51267	-6.22727
3	0.22729	-0.76536	-1.70465	-2.55762	-3.67047	-4.86231	-5.53463	-6.25013
3.05	0.22452	-0.77236	-1.70927	-2.57308	-3.68751	-4.86452	-5.55565	-6.26373
3.1	0.21659	-0.77692	-1.71176	-2.59041	-3.70691	-4.8701	-5.57103	-6.28369
3.15	0.21466	-0.78146	-1.71599	-2.60309	-3.7208	-4.87376	-5.58985	-6.29943
3.2	0.20976	-0.78867	-1.72165	-2.61872	-3.73584	-4.87565	-5.60446	-6.31892
3.25	0.20894	-0.79079	-1.72274	-2.62474	-3.74777	-4.8803	-5.61966	-6.33681
3.3	0.2033	-0.79691	-1.72536	-2.64483	-3.76363	-4.88182	-5.63207	-6.34639
3.35	0.20051	-0.79936	-1.72951	-2.65189	-3.7687	-4.88492	-5.64384	-6.36042
3.4	0.19567	-0.80441	-1.73038	-2.6605	-3.7808	-4.88685	-5.65748	-6.37315
3.45	0.19652	-0.80802	-1.732	-2.66624	-3.79061	-4.88965	-5.66447	-6.38445
3.5	0.19395	-0.81073	-1.73266	-2.67221	-3.79935	-4.89275	-5.67551	-6.39763
3.55	0.19049	-0.81432	-1.73499	-2.67985	-3.80818	-4.89466	-5.68291	-6.41072
3.6	0.18904	-0.81524	-1.73428	-2.68555	-3.81436	-4.89447	-5.69048	-6.41815
3.65	0.18836	-0.81839	-1.73542	-2.69047	-3.82209	-4.8967	-5.69358	-6.41944
3.7	0.18776	-0.8184	-1.73665	-2.69414	-3.82562	-4.89888	-5.70116	-6.42161
3.75	0.18587	-0.82081	-1.73747	-2.69596	-3.83209	-4.89931	-5.70284	-6.42694
3.8	0.18574	-0.82017	-1.73581	-2.69612	-3.83495	-4.89898	-5.70289	-6.42798
3.85	0.18872	-0.82022	-1.73504	-2.69533	-3.83964	-4.89818	-5.70037	-6.42719
3.9	0.18783	-0.81935	-1.73565	-2.69038	-3.8423	-4.89975	-5.69631	-6.42497
3.95	0.19067	-0.81696	-1.72762	-2.68288	-3.84529	-4.89906	-5.68864	-6.41487
4	0.19301	-0.81044	-1.72991	-2.67114	-3.84551	-4.89818	-5.67493	-6.41266
4.05	0.20028	-0.8038	-1.72008	-2.65427	-3.84735	-4.89425	-5.66161	-6.39868
4.1	0.21125	-0.78867	-1.7083	-2.63304	-3.84194	-4.88854	-5.63693	-6.37877
4.15	0.22895	-0.7681	-1.69392	-2.6031	-3.82635	-4.87905	-5.60743	-6.3653
4.2	0.25826	-0.73622	-1.6728	-2.56117	-3.7973	-4.86006	-5.57261	-6.34639
4.25	0.29601	-0.68866	-1.6409	-2.5182	-3.75517	-4.82326	-5.5277	-6.32296
4.3	0.35399	-0.63059	-1.60521	-2.46623	-3.69564	-4.77035	-5.47303	-6.29632
4.35	0.42204	-0.55711	-1.5613	-2.40355	-3.62596	-4.70179	-5.41266	-6.26377
4.4	0.49986	-0.48012	-1.51527	-2.34113	-3.55	-4.63064	-5.34605	-6.22954
4.45	0.5689	-0.40642	-1.46559	-2.27829	-3.47652	-4.55633	-5.286	-6.19755
4.5	0.64046	-0.3288	-1.41896	-2.21832	-3.40621	-4.48693	-5.23134	-6.16378
4.55	0.70534	-0.2536	-1.3711	-2.16567	-3.34531	-4.38398	-5.17437	-6.13011
4.6	0.77546	-0.17503	-1.31925	-2.11744	-3.27155	-4.31462	-5.12344	-6.10798
4.65	0.85841	-0.09787	-1.27843	-2.08793	-3.17704	-4.23642	-5.08608	-6.07915
4.7	0.93431	-0.03055	-1.24692	-2.06918	-3.06818	-4.12604	-5.06093	-6.07745
4.75	1	0	-1.24346	-2.07965	-3.03673	-4	-5.04691	-6.06474
4.8	0.97818	-0.04824	-1.26914	-2.12281	-3.10479	-4.00502	-5.08068	-6.06625
4.85	0.83857	-0.16477	-1.33317	-2.20305	-3.21223	-4.20363	-5.16676	-6.08609
4.9	0.65416	-0.33707	-1.42738	-2.28658	-3.43849	-4.4057	-5.28021	-6.11062
4.95	0.48263	-0.5094	-1.51521	-2.38359	-3.67777	-4.58261	-5.37932	-6.14676
5	0.34995	-0.6342	-1.59135	-2.46906	-3.79854	-4.73345	-5.46662	-6.18876
5.05	0.27117	-0.71494	-1.64575	-2.54743	-3.8522	-4.81518	-5.54169	-6.22997
5.1	0.22395	-0.76342	-1.68657	-2.60922	-3.87377	-4.8553	-5.60149	-6.27369
5.15	0.19686	-0.79417	-1.711	-2.65809	-3.88572	-4.87453	-5.65081	-6.31296
5.2	0.18298	-0.81287	-1.72905	-2.69257	-3.89325	-4.88729	-5.69052	-6.35128
5.25	0.17114	-0.82745	-1.73677	-2.72371	-3.89741	-4.89569	-5.72556	-6.388
5.3	0.16253	-0.83659	-1.74837	-2.74625	-3.90127	-4.90143	-5.75088	-6.42443
5.35	0.15345	-0.84478	-1.75486	-2.76043	-3.90619	-4.90649	-5.77072	-6.45328
5.4	0.1506	-0.84941	-1.75738	-2.77337	-3.909	-4.90795	-5.78822	-6.47953
5.45	0.14679	-0.85485	-1.76574	-2.78352	-3.90986	-4.91149	-5.80296	-6.50999
5.5	0.14412	-0.8585	-1.76424	-2.79267	-3.9138	-4.91311	-5.81411	-6.53248
5.55	0.14237	-0.86355	-1.76915	-2.79812	-3.91439	-4.91551	-5.82323	-6.55533
5.6	0.14066	-0.86456	-1.77041	-2.80623	-3.91654	-4.91578	-5.83188	-6.56971
5.65	0.1383	-0.86791	-1.7693	-2.808	-3.91783	-4.91891	-5.83902	-6.59137
5.7	0.13784	-0.86928	-1.77153	-2.81113	-3.92124	-4.91901	-5.84418	-6.60004
5.75	0.135	-0.8708	-1.77563	-2.81678	-3.92025	-4.91941	-5.84882	-6.61582
5.8	0.1339	-0.87295	-1.77314	-2.8177	-3.92	-4.92031	-5.85478	-6.62663
5.85	0.13223	-0.87274	-1.77824	-2.82179	-3.9222	-4.92135	-5.85693	-6.64333
5.9	0.13214	-0.87447	-1.77524	-2.82492	-3.92287	-4.92157	-5.86051	-6.64929
5.95	0.13568	-0.87571	-1.77981	-2.82793	-3.92478	-4.92216	-5.86333	-6.65699
6	0.13037	-0.87575	-1.77991	-2.82632	-3.92468	-4.92212	-5.86651	-6.66561
6.05	0.13044	-0.87771	-1.78188	-2.83204	-3.92574	-4.92321	-5.86935	-6.67187
6.1	0.13044	-0.87845	-1.78135	-2.83118	-3.9257	-4.92356	-5.8716	-6.68045
6.15	0.12841	-0.8798	-1.7802	-2.83484	-3.9277	-4.92351	-5.87304	-6.68705
6.2	0.12989	-0.88093	-1.78281	-2.83589	-3.92665	-4.92543	-5.87487	-6.69409
6.25	0.12769	-0.88057	-1.77902	-2.83799	-3.92733	-4.92523	-5.87772	-6.69709
6.3	0.12808	-0.8812	-1.78043	-2.83724	-3.9295	-4.92535	-5.87844	-6.70537
6.35	0.12593	-0.88231	-1.78153	-2.83932	-3.92832	-4.92541	-5.87892	-6.70906
6.4	0.12575	-0.88257	-1.78343	-2.84286	-3.92977	-4.92604	-5.88107	-6.71049
6.45	0.12593	-0.88397	-1.7844	-2.84276	-3.92918	-4.92692	-5.88389	-6.714
6.5	0.12836	-0.88375	-1.78468	-2.84466	-3.92995	-4.92732	-5.88392	-6.71795
6.55	0.1277	-0.8841	-1.78392	-2.84543	-3.93111	-4.92661	-5.88487	-6.71973
6.6	0.12388	-0.88473	-1.78394	-2.84404	-3.93191	-4.92867	-5.88699	-6.72578
6.65	0.12595	-0.88683	-1.78263	-2.84825	-3.93311	-4.92905	-5.88732	-6.7294
6.7	0.12585	-0.88639	-1.78486	-2.84672	-3.93255	-4.92797	-5.88783	-6.73187
6.75	0.12289	-0.88708	-1.78383	-2.84733	-3.93353	-4.92894	-5.88938	-6.73572
6.8	0.12337	-0.88793	-1.78415	-2.84911	-3.9335	-4.92881	-5.89137	-6.73985
6.85	0.1235	-0.88791	-1.78633	-2.84755	-3.93549	-4.92949	-5.89194	-6.73875
6.9	0.12167	-0.8882	-1.78877	-2.85102	-3.93482	-4.92878	-5.89243	-6.7429
6.95	0.12292	-0.88913	-1.78784	-2.85249	-3.93329	-4.92959	-5.89371	-6.7451
7	0.12105	-0.88958	-1.78669	-2.85202	-3.93489	-4.92937	-5.89401	-6.74591
7.05	0.12268	-0.889	-1.78672	-2.85211	-3.93502	-4.92974	-5.89475	-6.74661
7.1	0.12346	-0.88936	-1.78834	-2.8515	-3.93451	-4.92956	-5.89441	-6.75138
7.15	0.12277	-0.89074	-1.78812	-2.85387	-3.9364	-4.93023	-5.89535	-6.75146
7.2	0.12542	-0.89127	-1.78935	-2.85457	-3.93523	-4.93034	-5.8972	-6.75726
7.25	0.1233	-0.89198	-1.78907	-2.85492	-3.93417	-4.93065	-5.89685	-6.75805
7.3	0.12176	-0.89163	-1.78833	-2.8553	-3.93708	-4.92953	-5.89981	-6.75654
7.35	0.12201	-0.89198	-1.78774	-2.85484	-3.93729	-4.93121	-5.89895	-6.76133
7.4	0.12327	-0.89262	-1.78914	-2.85682	-3.93511	-4.93129	-5.89874	-6.76106
7.45	0.12079	-0.8931	-1.78695	-2.85438	-3.93733	-4.93011	-5.89985	-6.76287
7.5	0.12309	-0.89322	-1.79103	-2.85782	-3.93488	-4.93104	-5.8986	-6.76393
7.55	0.12585	-0.8939	-1.78614	-2.85517	-3.93546	-4.93153	-5.90065	-6.76401
7.6	0.12323	-0.89337	-1.78788	-2.8544	-3.9357	-4.92997	-5.8985	-6.76499
7.65	0.12668	-0.8933	-1.7875	-2.85393	-3.93626	-4.93072	-5.89937	-6.76697
7.7	0.12622	-0.89281	-1.7895	-2.85725	-3.9352	-4.9309	-5.89928	-6.76882
7.75	0.12411	-0.89358	-1.78735	-2.85436	-3.93674	-4.93099	-5.90012	-6.76557
7.8	0.12745	-0.89385	-1.78732	-2.85656	-3.93468	-4.93025	-5.8971	-6.76973
7.85	0.12528	-0.89462	-1.78582	-2.85515	-3.93682	-4.92986	-5.89808	-6.76791
7.9	0.12828	-0.8941	-1.7867	-2.85677	-3.93814	-4.92995	-5.89782	-6.77063
7.95	0.12957	-0.89382	-1.78837	-2.85381	-3.93625	-4.92902	-5.89565	-6.76949
8	0.12764	-0.89306	-1.78442	-2.85678	-3.93566	-4.92713	-5.8955	-6.76803
8.05	0.13059	-0.89361	-1.78699	-2.8541	-3.93493	-4.92838	-5.89694	-6.77059
8.1	0.13135	-0.89373	-1.78372	-2.85468	-3.93537	-4.92758	-5.89517	-6.76963
8.15	0.13434	-0.89323	-1.78264	-2.85381	-3.93189	-4.92471	-5.89376	-6.76609
8.2	0.13451	-0.89234	-1.77843	-2.85269	-3.93381	-4.92484	-5.89208	-6.76693
8.25	0.13502	-0.8925	-1.77871	-2.8507	-3.9338	-4.92487	-5.89239	-6.76665
8.3	0.13754	-0.89323	-1.77935	-2.85085	-3.93146	-4.92446	-5.89219	-6.76719
8.35	0.13881	-0.89314	-1.7759	-2.84764	-3.9321	-4.92401	-5.89162	-6.76337
8.4	0.14173	-0.89204	-1.77708	-2.84671	-3.93129	-4.92446	-5.89062	-6.7615
8.45	0.14329	-0.8924	-1.77771	-2.84435	-3.931	-4.92352	-5.89105	-6.76207
8.5	0.14444	-0.89196	-1.77381	-2.84418	-3.93199	-4.92308	-5.8901	-6.76076
8.55	0.14111	-0.89227	-1.77368	-2.84129	-3.93048	-4.92355	-5.88925	-6.76029
8.6	0.14281	-0.89246	-1.77438	-2.84017	-3.93076	-4.92284	-5.88833	-6.75874
8.65	0.14508	-0.89176	-1.77237	-2.8402	-3.92914	-4.92195	-5.88755	-6.75643
8.7	0.14507	-0.89092	-1.77118	-2.8358	-3.92804	-4.92203	-5.88629	-6.75564
8.75	0.14369	-0.89054	-1.77169	-2.83788	-3.92894	-4.92157	-5.88504	-6.75766
8.8	0.14651	-0.89017	-1.76773	-2.83465	-3.92823	-4.92179	-5.8819	-6.75146
8.85	0.14647	-0.88924	-1.76718	-2.82784	-3.93044	-4.92162	-5.87791	-6.75166
8.9	0.14894	-0.88934	-1.76507	-2.82253	-3.9295	-4.92077	-5.87465	-6.74987
8.95	0.15107	-0.88743	-1.76461	-2.81852	-3.92764	-4.91955	-5.86999	-6.74528
9	0.15213	-0.88531	-1.76361	-2.80854	-3.92765	-4.91823	-5.85967	-6.74143
9.05	0.15781	-0.88221	-1.75572	-2.79488	-3.9231	-4.91557	-5.8527	-6.73747
9.1	0.16966	-0.87656	-1.75666	-2.77579	-3.91935	-4.91085	-5.84051	-6.73056
9.15	0.18154	-0.86459	-1.7477	-2.75291	-3.90885	-4.90515	-5.8279	-6.72919
9.2	0.20708	-0.85011	-1.73149	-2.72244	-3.89309	-4.8934	-5.81189	-6.72241
9.25	0.24023	-0.82772	-1.70912	-2.68433	-3.85648	-4.87192	-5.78869	-6.71911
9.3	0.29546	-0.79894	-1.67645	-2.64563	-3.81748	-4.83289	-5.76396	-6.71473
9.35	0.38005	-0.7629	-1.64359	-2.6015	-3.76714	-4.77003	-5.73495	-6.70631
9.4	0.48024	-0.72475	-1.59623	-2.56029	-3.70494	-4.69247	-5.70789	-6.70293
9.45	0.58341	-0.69283	-1.54955	-2.5182	-3.64353	-4.61032	-5.68316	-6.69763
9.5	0.69019	-0.66449	-1.51318	-2.49653	-3.60837	-4.52941	-5.6645	-6.69277
9.55	0.74505	-0.65051	-1.48405	-2.4836	-3.60163	-4.47707	-5.65416	-6.68921
9.6	0.74724	-0.64753	-1.47819	-2.4915	-3.57083	-4.50158	-5.6608	-6.68725
9.65	0.68311	-0.65566	-1.5026	-2.51384	-3.53076	-4.58517	-5.68202	-6.68684
9.7	0.5966	-0.68399	-1.54039	-2.54824	-3.53741	-4.65519	-5.70728	-6.69027
9.75	0.52015	-0.71933	-1.58273	-2.59176	-3.61987	-4.69254	-5.73278	-6.69283
9.8	0.44511	-0.76459	-1.62913	-2.63539	-3.74503	-4.71797	-5.75503	-6.69825
9.85	0.36728	-0.80423	-1.66847	-2.67735	-3.83932	-4.75911	-5.7753	-6.70313
9.9	0.28023	-0.83519	-1.69765	-2.71506	-3.88408	-4.81758	-5.79368	-6.70929
9.95	0.21744	-0.85624	-1.72252	-2.74428	-3.90609	-4.8671	-5.80997	-6.71211
10	0.18549	-0.86857	-1.73727	-2.76872	-3.91987	-4.89508	-5.82333	-6.72054
10.05	0.16692	-0.87712	-1.75576	-2.78733	-3.92503	-4.90836	-5.8361	-6.7267
10.1	0.1534	-0.88345	-1.76418	-2.80378	-3.93014	-4.9159	-5.84602	-6.73468
10.15	0.14596	-0.88807	-1.77025	-2.81734	-3.93174	-4.92127	-5.8534	-6.74368
10.2	0.13871	-0.8915	-1.77711	-2.82389	-3.9339	-4.92363	-5.86175	-6.74807
10.25	0.1371	-0.89388	-1.78249	-2.83474	-3.93702	-4.92659	-5.86613	-6.75188
10.3	0.1331	-0.89617	-1.78582	-2.84011	-3.93583	-4.92763	-5.87195	-6.75586
10.35	0.13108	-0.89741	-1.78468	-2.84483	-3.93731	-4.92865	-5.87804	-6.76222
10.4	0.12601	-0.89895	-1.7875	-2.84676	-3.93949	-4.93123	-5.88029	-6.76626
10.45	0.12481	-0.9005	-1.78788	-2.85059	-3.93805	-4.93094	-5.8852	-6.77126
10.5	0.12261	-0.90104	-1.78963	-2.85139	-3.93993	-4.93265	-5.88759	-6.77772
10.55	0.12098	-0.90156	-1.79116	-2.85581	-3.94131	-4.93265	-5.89076	-6.78091
10.6	0.12116	-0.90321	-1.7902	-2.85796	-3.94343	-4.93348	-5.89323	-6.78461
10.65	0.11972	-0.90356	-1.79656	-2.85999	-3.94188	-4.93468	-5.89406	-6.78709
10.7	0.12135	-0.9045	-1.79558	-2.86117	-3.94195	-4.93437	-5.89745	-6.79108
10.75	0.11771	-0.90497	-1.79596	-2.86264	-3.94247	-4.93563	-5.89849	-6.79653
10.8	0.11673	-0.90502	-1.79858	-2.86503	-3.94399	-4.93651	-5.89754	-6.79847
10.85	0.11945	-0.90659	-1.79706	-2.86588	-3.94292	-4.93752	-5.90001	-6.80188
10.9	0.11707	-0.90652	-1.80134	-2.86379	-3.94402	-4.93631	-5.90251	-6.80528
10.95	0.11697	-0.90626	-1.80235	-2.86729	-3.94458	-4.93675	-5.9028	-6.80725
11	0.11647	-0.90692	-1.80233	-2.8676	-3.94443	-4.93704	-5.90281	-6.80924
11.05	0.11529	-0.90748	-1.80608	-2.8695	-3.94398	-4.93769	-5.90486	-6.81184
11.1	0.1168	-0.90732	-1.80396	-2.87007	-3.94498	-4.93728	-5.90475	-6.81383
11.15	0.11439	-0.90919	-1.79854	-2.87032	-3.9459	-4.93716	-5.90569	-6.81574
11.2	0.11411	-0.90938	-1.80295	-2.86798	-3.94472	-4.93767	-5.90642	-6.81457
11.25	0.11548	-0.90781	-1.8039	-2.87119	-3.94381	-4.93879	-5.90828	-6.82037
11.3	0.11853	-0.90827	-1.80493	-2.87205	-3.94503	-4.93873	-5.90747	-6.81933
11.35	0.1156	-0.90929	-1.80471	-2.87411	-3.94527	-4.93847	-5.90788	-6.81936
11.4	0.11286	-0.90871	-1.80623	-2.8712	-3.94631	-4.93795	-5.90929	-6.82262
11.45	0.1142	-0.90974	-1.81176	-2.87283	-3.94501	-4.93822	-5.90923	-6.82103
11.5	0.11465	-0.90864	-1.80817	-2.87385	-3.94414	-4.93843	-5.91093	-6.82302
11.55	0.11262	-0.90919	-1.80967	-2.87206	-3.94633	-4.93864	-5.91044	-6.82534
11.6	0.11302	-0.90944	-1.80871	-2.87137	-3.94701	-4.94046	-5.9092	-6.82437
11.65	0.1164	-0.90924	-1.80942	-2.87077	-3.94685	-4.93785	-5.91043	-6.82537
11.7	0.11182	-0.90981	-1.80834	-2.87387	-3.94528	-4.93892	-5.90901	-6.8288
11.75	0.11527	-0.90967	-1.80778	-2.8713	-3.94545	-4.93915	-5.90887	-6.82896
11.8	0.11477	-0.9096	-1.80843	-2.873	-3.94429	-4.93922	-5.90774	-6.83006
11.85	0.1137	-0.90844	-1.81079	-2.87195	-3.94617	-4.93857	-5.90983	-6.8319
11.9	0.11785	-0.90914	-1.80866	-2.86997	-3.94443	-4.93853	-5.90738	-6.83177
11.95	0.11637	-0.90978	-1.80741	-2.86835	-3.94687	-4.93965	-5.90626	-6.83005
12	0.11762	-0.90912	-1.79974	-2.86711	-3.94321	-4.9382	-5.90278	-6.8314
12.05	0.12024	-0.90768	-1.80017	-2.86232	-3.94429	-4.93744	-5.90229	-6.83227
12.1	0.12205	-0.90809	-1.79526	-2.8587	-3.94314	-4.93699	-5.89936	-6.83358
12.15	0.12853	-0.90624	-1.78964	-2.856	-3.9447	-4.93589	-5.89745	-6.83175
12.2	0.13266	-0.9014	-1.78462	-2.84877	-3.94203	-4.93212	-5.89226	-6.83086
12.25	0.14171	-0.89344	-1.77478	-2.8415	-3.94113	-4.93054	-5.8893	-6.83154
12.3	0.15265	-0.8832	-1.76364	-2.82947	-3.93106	-4.92419	-5.88176	-6.8293
12.35	0.17161	-0.86606	-1.74262	-2.81641	-3.92135	-4.91397	-5.87501	-6.83093
12.4	0.20503	-0.84653	-1.7204	-2.80402	-3.89906	-4.89772	-5.86645	-6.83337
12.45	0.25247	-0.82334	-1.68937	-2.78757	-3.86737	-4.87618	-5.8567	-6.82753
12.5	0.30945	-0.79974	-1.65627	-2.77419	-3.83356	-4.85154	-5.84892	-6.8282
12.55	0.36522	-0.78375	-1.61167	-2.75823	-3.8056	-4.82919	-5.83916	-6.82514
12.6	0.40639	-0.77498	-1.57879	-2.7461	-3.79892	-4.81958	-5.83194	-6.82605
12.65	0.41555	-0.77623	-1.56112	-2.74483	-3.81259	-4.8219	-5.82909	-6.8253
12.7	0.40567	-0.77975	-1.5464	-2.74514	-3.83023	-4.82492	-5.83009	-6.82367
12.75	0.39165	-0.78546	-1.54751	-2.75112	-3.84084	-4.81849	-5.83811	-6.82153
12.8	0.39181	-0.79165	-1.55718	-2.75773	-3.84247	-4.8129	-5.84695	-6.8206
12.85	0.38067	-0.80004	-1.57667	-2.77133	-3.82999	-4.81861	-5.85366	-6.81513
12.9	0.35686	-0.8124	-1.6065	-2.78386	-3.82008	-4.83253	-5.86341	-6.82314
12.95	0.31706	-0.82823	-1.64441	-2.799	-3.82379	-4.85059	-5.87006	-6.82966
13	0.26273	-0.84781	-1.67891	-2.81075	-3.85817	-4.87254	-5.87648	-6.8305
13.05	0.21174	-0.86718	-1.71575	-2.8241	-3.89466	-4.89543	-5.88321	-6.83222
13.1	0.17006	-0.88117	-1.73657	-2.83649	-3.92183	-4.91269	-5.88773	-6.83348
13.15	0.14928	-0.89151	-1.75712	-2.84575	-3.934	-4.92464	-5.89162	-6.83591
13.2	0.13632	-0.89729	-1.77067	-2.85277	-3.94094	-4.93015	-5.89517	-6.83794
13.25	0.1281	-0.90333	-1.78326	-2.85883	-3.94243	-4.93374	-5.89765	-6.83981
13.3	0.12361	-0.90665	-1.78937	-2.86408	-3.94242	-4.93608	-5.90087	-6.84228
13.35	0.12056	-0.90839	-1.7935	-2.8669	-3.94626	-4.93726	-5.90382	-6.84036
13.4	0.11709	-0.90971	-1.79793	-2.86768	-3.94685	-4.93922	-5.90502	-6.84446
13.45	0.11734	-0.912	-1.80098	-2.87183	-3.94754	-4.94023	-5.90781	-6.84255
13.5	0.11433	-0.91295	-1.80361	-2.87366	-3.9496	-4.94003	-5.90983	-6.84514
13.55	0.11392	-0.91417	-1.80636	-2.87714	-3.94701	-4.94072	-5.91215	-6.84569
13.6	0.11311	-0.91564	-1.80793	-2.87648	-3.94832	-4.94142	-5.91277	-6.84598
13.65	0.11317	-0.9158	-1.80962	-2.87861	-3.95131	-4.94088	-5.91274	-6.84601
13.7	0.11093	-0.91658	-1.80916	-2.87638	-3.94828	-4.94043	-5.91465	-6.84752
13.75	0.11011	-0.91588	-1.81138	-2.8791	-3.9481	-4.94071	-5.91501	-6.84926
13.8	0.11171	-0.91775	-1.81097	-2.88021	-3.94974	-4.94095	-5.91526	-6.84838
13.85	0.11162	-0.91679	-1.81126	-2.8823	-3.95081	-4.94165	-5.91568	-6.85068
13.9	0.11117	-0.91835	-1.81365	-2.8825	-3.95023	-4.94239	-5.91702	-6.84948
13.95	0.10914	-0.91734	-1.80977	-2.88099	-3.95024	-4.94159	-5.91846	-6.85273
14	0.11279	-0.91817	-1.81308	-2.88388	-3.94969	-4.94346	-5.91801	-6.85388
14.05	0.11153	-0.91799	-1.81136	-2.88393	-3.95161	-4.94334	-5.91838	-6.85451
14.1	0.11274	-0.91793	-1.81466	-2.88261	-3.95209	-4.94269	-5.91807	-6.85538
14.15	0.11571	-0.91738	-1.80978	-2.88503	-3.95154	-4.94286	-5.91868	-6.85615
14.2	0.11594	-0.9184	-1.81219	-2.88343	-3.95163	-4.94282	-5.91668	-6.85574
14.25	0.11659	-0.91826	-1.81148	-2.88279	-3.94996	-4.94278	-5.91724	-6.85784
14.3	0.11865	-0.91898	-1.81022	-2.88377	-3.95082	-4.94103	-5.91659	-6.85852
14.35	0.12335	-0.91917	-1.80818	-2.88446	-3.9504	-4.94058	-5.91793	-6.85857
14.4	0.12459	-0.91921	-1.80657	-2.88491	-3.95205	-4.94165	-5.91805	-6.86111
14.45	0.12142	-0.91924	-1.80704	-2.88476	-3.9542	-4.94205	-5.91815	-6.8583
14.5	0.12088	-0.91791	-1.80436	-2.8845	-3.9535	-4.942	-5.91896	-6.86161
14.55	0.12005	-0.91847	-1.80685	-2.8842	-3.9542	-4.94279	-5.92121	-6.86109
14.6	0.11986	-0.91894	-1.80741	-2.88488	-3.95274	-4.94245	-5.91909	-6.86234
14.65	0.12079	-0.91913	-1.80788	-2.88449	-3.95158	-4.94221	-5.92023	-6.86264
14.7	0.11923	-0.91928	-1.80855	-2.88613	-3.95294	-4.94187	-5.92152	-6.86083
14.75	0.11771	-0.92041	-1.81119	-2.8852	-3.95185	-4.94223	-5.92188	-6.8626
14.8	0.11387	-0.91983	-1.81139	-2.88546	-3.9538	-4.94377	-5.92254	-6.86267
14.85	0.11518	-0.92101	-1.81361	-2.88788	-3.95206	-4.9439	-5.92308	-6.86198
14.9	0.11099	-0.92072	-1.81646	-2.88757	-3.95289	-4.9455	-5.92412	-6.86475
14.95	0.11199	-0.92123	-1.81364	-2.88659	-3.95239	-4.94548	-5.92301	-6.86515
15	0.10957	-0.91996	-1.81459	-2.88844	-3.95414	-4.94534	-5.92231	-6.86235
15.05	0.10842	-0.9212	-1.81439	-2.88721	-3.95282	-4.9464	-5.92374	-6.86596
15.1	0.10866	-0.92089	-1.81871	-2.89	-3.95291	-4.94585	-5.92454	-6.86595
15.15	0.10922	-0.92136	-1.81576	-2.89105	-3.95447	-4.94636	-5.92425	-6.86539
15.2	0.11059	-0.92082	-1.8202	-2.8888	-3.95484	-4.94469	-5.92428	-6.8646
15.25	0.10978	-0.92133	-1.81453	-2.88969	-3.95295	-4.9451	-5.92541	-6.86647
15.3	0.10909	-0.91991	-1.81858	-2.89085	-3.95413	-4.94637	-5.92439	-6.86526
15.35	0.11002	-0.92104	-1.81915	-2.89017	-3.95191	-4.94599	-5.92516	-6.86545
15.4	0.10991	-0.92074	-1.81641	-2.88879	-3.95468	-4.94575	-5.92545	-6.86505
15.45	0.10835	-0.91976	-1.81798	-2.89146	-3.95393	-4.94546	-5.92541	-6.86587
15.5	0.1114	-0.92039	-1.81984	-2.89013	-3.95318	-4.94456	-5.9258	-6.86735
15.55	0.10868	-0.92021	-1.81655	-2.88928	-3.95189	-4.94531	-5.92514	-6.8684
15.6	0.1091	-0.91991	-1.81794	-2.88936	-3.95228	-4.94549	-5.92565	-6.86812
15.65	0.11027	-0.91912	-1.81755	-2.89022	-3.95376	-4.94453	-5.92509	-6.86677
15.7	0.11084	-0.91962	-1.81585	-2.88922	-3.95146	-4.94452	-5.92493	-6.86616
15.75	0.10854	-0.91838	-1.81388	-2.88788	-3.95162	-4.94551	-5.92434	-6.86758
15.8	0.11108	-0.91842	-1.81759	-2.88937	-3.9513	-4.94516	-5.92489	-6.86527
15.85	0.11555	-0.91667	-1.81453	-2.88899	-3.95034	-4.94501	-5.92421	-6.86669
15.9	0.11202	-0.91841	-1.8143	-2.88952	-3.9501	-4.94545	-5.92362	-6.8693
15.95	0.11565	-0.91863	-1.81282	-2.88793	-3.95141	-4.94506	-5.922	-6.86559
16	0.11609	-0.91711	-1.81457	-2.88535	-3.95131	-4.94634	-5.92345	-6.86333
16.05	0.11599	-0.9161	-1.80952	-2.8839	-3.95218	-4.94535	-5.92112	-6.86646
16.1	0.11614	-0.91598	-1.80569	-2.88027	-3.95173	-4.94491	-5.91971	-6.86676
16.15	0.11917	-0.9141	-1.80611	-2.87853	-3.95153	-4.94385	-5.91746	-6.86366
16.2	0.12876	-0.91039	-1.7998	-2.87359	-3.94915	-4.94224	-5.91745	-6.86248
16.25	0.13321	-0.9061	-1.79033	-2.86896	-3.9474	-4.94074	-5.91372	-6.86457
16.3	0.14596	-0.90075	-1.78366	-2.8662	-3.94468	-4.93537	-5.91148	-6.86167
16.35	0.16727	-0.89257	-1.77223	-2.85989	-3.93675	-4.92949	-5.90852	-6.86169
16.4	0.19056	-0.88396	-1.75655	-2.85451	-3.92275	-4.9205	-5.9046	-6.8635
16.45	0.223	-0.87876	-1.74137	-2.84593	-3.9086	-4.91555	-5.90185	-6.85949
16.5	0.23684	-0.87438	-1.72832	-2.8408	-3.89406	-4.91672	-5.89605	-6.85825
16.55	0.23776	-0.87472	-1.7203	-2.83928	-3.89112	-4.92009	-5.89601	-6.85805
16.6	0.22979	-0.87777	-1.71401	-2.83726	-3.894	-4.92317	-5.89487	-6.85806
16.65	0.21797	-0.88026	-1.7091	-2.8378	-3.91117	-4.9245	-5.89548	-6.85615
16.7	0.22044	-0.88322	-1.7047	-2.83767	-3.92301	-4.92269	-5.89811	-6.86056
16.75	0.22454	-0.88589	-1.70338	-2.83791	-3.93228	-4.91675	-5.89971	-6.85684
16.8	0.23278	-0.88665	-1.70368	-2.84337	-3.93307	-4.90909	-5.9015	-6.85892
16.85	0.23643	-0.88562	-1.70128	-2.84688	-3.93043	-4.90161	-5.90452	-6.85735
16.9	0.23998	-0.88658	-1.70694	-2.85085	-3.92166	-4.89788	-5.90844	-6.85994
16.95	0.22987	-0.88831	-1.72492	-2.85169	-3.91164	-4.90271	-5.90875	-6.85876
17	0.20359	-0.89097	-1.73667	-2.85905	-3.90684	-4.91347	-5.91067	-6.85908
17.05	0.17916	-0.89663	-1.75155	-2.86519	-3.91627	-4.92433	-5.91218	-6.86092
17.1	0.16047	-0.901	-1.76295	-2.86722	-3.92755	-4.93282	-5.91254	-6.86081
17.15	0.14631	-0.90317	-1.77588	-2.87027	-3.93694	-4.9358	-5.9155	-6.86045
17.2	0.14415	-0.90633	-1.78431	-2.87279	-3.94234	-4.93913	-5.91555	-6.86246
17.25	0.13806	-0.9075	-1.79218	-2.87655	-3.94544	-4.94031	-5.9163	-6.86393
17.3	0.135	-0.91071	-1.79478	-2.87745	-3.9467	-4.94285	-5.91774	-6.86009
17.35	0.13176	-0.91034	-1.79552	-2.87925	-3.94747	-4.94254	-5.9188	-6.86343
17.4	0.12992	-0.91017	-1.80052	-2.88287	-3.94849	-4.9417	-5.9208	-6.86471
17.45	0.13073	-0.91022	-1.80165	-2.88266	-3.94788	-4.94295	-5.92005	-6.86415
17.5	0.12857	-0.90799	-1.7983	-2.88414	-3.94591	-4.94252	-5.92093	-6.86488
17.55	0.12826	-0.92034	-1.8006	-2.88388	-3.94602	-4.94311	-5.92241	-6.86572
17.6	0.12854	-0.92424	-1.8053	-2.8865	-3.94775	-4.9423	-5.92209	-6.86573
17.65	0.12726	-0.92416	-1.80399	-2.88638	-3.94637	-4.9421	-5.92201	-6.86599
17.7	0.12827	-0.92676	-1.80266	-2.88789	-3.94758	-4.94236	-5.92446	-6.86651
17.75	0.12825	-0.92637	-1.80844	-2.88857	-3.94942	-4.94378	-5.92408	-6.86666
17.8	0.12268	-0.92662	-1.81029	-2.88875	-3.95163	-4.94488	-5.92479	-6.86611
17.85	0.11874	-0.9267	-1.81142	-2.8915	-3.95258	-4.94594	-5.92433	-6.86501
17.9	0.11664	-0.92673	-1.80971	-2.88917	-3.95461	-4.94666	-5.92647	-6.86702
17.95	0.11587	-0.92751	-1.81143	-2.89185	-3.9526	-4.94772	-5.92521	-6.86691
18	0.11446	-0.92812	-1.8134	-2.89095	-3.95387	-4.94676	-5.92568	-6.86846
18.05	0.1139	-0.92787	-1.81203	-2.89292	-3.95423	-4.94865	-5.9253	-6.86856
18.1	0.11277	-0.92864	-1.81385	-2.89047	-3.95519	-4.94829	-5.92617	-6.86713
18.15	0.11115	-0.92824	-1.8198	-2.89136	-3.95328	-4.9479	-5.92672	-6.86971
18.2	0.11063	-0.92858	-1.81278	-2.89299	-3.95326	-4.94939	-5.92702	-6.86997
18.25	0.11066	-0.92733	-1.81964	-2.89461	-3.95346	-4.9489	-5.9268	-6.86937
18.3	0.11231	-0.92934	-1.81948	-2.8923	-3.95345	-4.94982	-5.9271	-6.86989
18.35	0.10776	-0.92889	-1.81685	-2.89236	-3.95472	-4.9493	-5.92664	-6.86902
18.4	0.11008	-0.92914	-1.81918	-2.89268	-3.95414	-4.9484	-5.92686	-6.87171
18.45	0.11083	-0.92929	-1.81571	-2.89026	-3.95497	-4.95056	-5.92803	-6.87047
18.5	0.11149	-0.92825	-1.8176	-2.89143	-3.95538	-4.94964	-5.927	-6.87081
18.55	0.1107	-0.92892	-1.81712	-2.89005	-3.9533	-4.94973	-5.92667	-6.87088
18.6	0.1113	-0.9279	-1.81535	-2.8923	-3.95584	-4.94889	-5.92486	-6.87045
18.65	0.11374	-0.92778	-1.81233	-2.89018	-3.95542	-4.94898	-5.926	-6.87196
18.7	0.11428	-0.92686	-1.81481	-2.8899	-3.95495	-4.94792	-5.92435	-6.87057
18.75	0.11694	-0.92502	-1.80979	-2.88672	-3.95431	-4.94663	-5.92359	-6.87027
18.8	0.11663	-0.9226	-1.80709	-2.8863	-3.95072	-4.94694	-5.92337	-6.86931
18.85	0.12397	-0.92176	-1.80415	-2.88617	-3.94978	-4.94516	-5.92218	-6.871
18.9	0.12657	-0.92024	-1.80162	-2.88301	-3.94508	-4.94497	-5.9197	-6.86913
18.95	0.13469	-0.91861	-1.79574	-2.88121	-3.94362	-4.94452	-5.92066	-6.8702
19	0.14137	-0.9163	-1.79141	-2.8782	-3.94294	-4.94231	-5.9177	-6.87214
19.05	0.1495	-0.91726	-1.77855	-2.876	-3.94483	-4.93853	-5.91566	-6.87082
19.1	0.16406	-0.91784	-1.77172	-2.87537	-3.94835	-4.93314	-5.91543	-6.86782
19.15	0.16951	-0.9169	-1.7545	-2.87638	-3.94958	-4.92837	-5.9154	-6.86902
19.2	0.17053	-0.91765	-1.7526	-2.87349	-3.95077	-4.92526	-5.9159	-6.86867
19.25	0.16626	-0.91734	-1.7492	-2.87319	-3.95127	-4.9273	-5.91471	-6.86941
19.3	0.1642	-0.91828	-1.75113	-2.87259	-3.94805	-4.93187	-5.91747	-6.86703
19.35	0.1564	-0.91661	-1.75793	-2.87667	-3.94775	-4.93781	-5.91758	-6.86757
19.4	0.15296	-0.91712	-1.76271	-2.87691	-3.94715	-4.94036	-5.91812	-6.86895
19.45	0.14722	-0.91821	-1.76932	-2.87655	-3.94327	-4.94284	-5.919	-6.86914
19.5	0.14158	-0.91732	-1.77445	-2.87773	-3.94386	-4.94446	-5.92067	-6.86861
19.55	0.14424	-0.91943	-1.77645	-2.88231	-3.94659	-4.94508	-5.92183	-6.86962
19.6	0.14298	-0.92182	-1.78182	-2.88202	-3.94857	-4.94413	-5.92249	-6.87054
19.65	0.14429	-0.92329	-1.78506	-2.88523	-3.94977	-4.94092	-5.92344	-6.87135
19.7	0.14024	-0.92356	-1.79029	-2.886	-3.95203	-4.94232	-5.92259	-6.86805
19.75	0.13545	-0.92423	-1.79009	-2.88633	-3.9543	-4.942	-5.92316	-6.8715
19.8	0.12791	-0.92652	-1.79751	-2.89062	-3.95373	-4.94396	-5.92316	-6.86922
19.85	0.12052	-0.92789	-1.80075	-2.88818	-3.95614	-4.94627	-5.92402	-6.8706
19.9	0.11488	-0.92761	-1.80592	-2.88969	-3.95641	-4.94832	-5.92467	-6.87085
19.95	0.111	-0.92938	-1.80822	-2.89144	-3.95795	-4.94923	-5.92428	-6.87059
20	0.11358	-0.92855	-1.8136	-2.89054	-3.95745	-4.9507	-5.92549	-6.86875
20.05	0.11176	-0.92904	-1.81039	-2.89192	-3.95753	-4.95093	-5.92463	-6.87179
20.1	0.11057	-0.92771	-1.81327	-2.89191	-3.95747	-4.95076	-5.92522	-6.86825
20.15	0.11017	-0.92865	-1.81199	-2.89251	-3.95767	-4.95052	-5.92669	-6.87217
20.2	0.11191	-0.92911	-1.8121	-2.8917	-3.95797	-4.95067	-5.9259	-6.86892
20.25	0.10978	-0.92897	-1.81548	-2.89117	-3.95619	-4.95053	-5.92449	-6.87094
20.3	0.11035	-0.92822	-1.8111	-2.88983	-3.95749	-4.94926	-5.92615	-6.87054
20.35	0.11191	-0.92938	-1.81203	-2.88929	-3.95721	-4.94977	-5.92635	-6.86907
20.4	0.11334	-0.92923	-1.81152	-2.88711	-3.9567	-4.9498	-5.92543	-6.87008
20.45	0.11441	-0.92737	-1.81133	-2.88791	-3.95648	-4.94928	-5.92571	-6.8664
20.5	0.1144	-0.92765	-1.80466	-2.88624	-3.95571	-4.94882	-5.92481	-6.87097
20.55	0.11835	-0.92556	-1.80226	-2.88328	-3.95519	-4.94845	-5.92519	-6.86948
20.6	0.12414	-0.92375	-1.79585	-2.8832	-3.95275	-4.94677	-5.92511	-6.86616
20.65	0.12755	-0.92092	-1.78964	-2.88121	-3.94958	-4.9439	-5.92391	-6.86857
20.7	0.1393	-0.91809	-1.78851	-2.87696	-3.94449	-4.94125	-5.92251	-6.86743
20.75	0.14883	-0.91646	-1.77732	-2.87638	-3.93974	-4.93879	-5.92322	-6.86773
20.8	0.15436	-0.91397	-1.77731	-2.87274	-3.93597	-4.937	-5.92317	-6.86673
20.85	0.15388	-0.91652	-1.77243	-2.87199	-3.93511	-4.93912	-5.92251	-6.87017
20.9	0.15086	-0.91536	-1.76592	-2.87272	-3.93769	-4.94054	-5.92169	-6.86678
20.95	0.14693	-0.91602	-1.76733	-2.87182	-3.93877	-4.94216	-5.92206	-6.86804
21	0.14462	-0.91774	-1.76572	-2.86988	-3.94096	-4.94146	-5.92107	-6.86639
21.05	0.14614	-0.91924	-1.76808	-2.872	-3.94487	-4.94182	-5.92263	-6.86632
21.1	0.14637	-0.91982	-1.76629	-2.86945	-3.94544	-4.94074	-5.92218	-6.86654
21.15	0.14721	-0.91951	-1.76352	-2.87321	-3.94753	-4.93946	-5.92308	-6.86678
21.2	0.14869	-0.91996	-1.76148	-2.87589	-3.9484	-4.93678	-5.92281	-6.86697
21.25	0.15021	-0.91918	-1.76607	-2.87636	-3.94661	-4.93564	-5.92254	-6.86599
21.3	0.15054	-0.91885	-1.76396	-2.8769	-3.94429	-4.93628	-5.92345	-6.86666
21.35	0.15152	-0.91954	-1.77115	-2.87864	-3.94048	-4.93714	-5.92345	-6.86728
21.4	0.14627	-0.92137	-1.77139	-2.87857	-3.93719	-4.93895	-5.922	-6.86728
21.45	0.14027	-0.92123	-1.78052	-2.87974	-3.93918	-4.94212	-5.9237	-6.86568
21.5	0.13108	-0.92198	-1.78941	-2.87977	-3.94303	-4.94371	-5.92325	-6.86711
21.55	0.12516	-0.92289	-1.79386	-2.88102	-3.94656	-4.94533	-5.92301	-6.86697
21.6	0.12404	-0.92163	-1.79637	-2.88156	-3.94909	-4.94848	-5.92231	-6.86447
21.65	0.12048	-0.92084	-1.7911	-2.88294	-3.94802	-4.94833	-5.9219	-6.86653
21.7	0.1195	-0.91976	-1.79324	-2.88198	-3.945	-4.94727	-5.92127	-6.86792
21.75	0.12383	-0.91839	-1.79897	-2.88088	-3.944	-4.94619	-5.92015	-6.86577
21.8	0.13029	-0.91855	-1.79299	-2.88214	-3.94242	-4.94456	-5.92103	-6.86899
21.85	0.13651	-0.91864	-1.79093	-2.88317	-3.94403	-4.94305	-5.91963	-6.86677
21.9	0.13999	-0.9198	-1.78347	-2.88312	-3.94593	-4.94118	-5.91976	-6.86739
21.95	0.14379	-0.91893	-1.78245	-2.88013	-3.95052	-4.93953	-5.91923	-6.86665
22	0.14516	-0.91855	-1.77773	-2.88105	-3.9486	-4.93921	-5.91896	-6.86836
22.05	0.1382	-0.92003	-1.77623	-2.8803	-3.95108	-4.9389	-5.91791	-6.86744
22.1	0.13624	-0.92147	-1.77625	-2.87959	-3.94832	-4.94041	-5.91903	-6.86635
22.15	0.13377	-0.9194	-1.77385	-2.88054	-3.94993	-4.94004	-5.92047	-6.86811
22.2	0.13329	-0.91876	-1.77853	-2.88096	-3.94896	-4.94041	-5.92038	-6.86685
22.25	0.13445	-0.91882	-1.78057	-2.88167	-3.94426	-4.94097	-5.92037	-6.86694
22.3	0.13184	-0.91703	-1.78209	-2.8819	-3.94472	-4.94189	-5.92183	-6.86878
22.35	0.13099	-0.91848	-1.78502	-2.88004	-3.9407	-4.94528	-5.92197	-6.87014
22.4	0.12985	-0.91924	-1.78788	-2.88325	-3.94103	-4.94536	-5.92306	-6.86931
22.45	0.12957	-0.91951	-1.79237	-2.88336	-3.9383	-4.9453	-5.92311	-6.87035
22.5	0.13125	-0.92213	-1.79475	-2.88605	-3.94242	-4.94497	-5.9213	-6.87132
22.55	0.12633	-0.92417	-1.79275	-2.88428	-3.94531	-4.94431	-5.92373	-6.86835
22.6	0.12721	-0.92425	-1.79487	-2.88549	-3.9485	-4.94348	-5.92354	-6.86924
22.65	0.1229	-0.92794	-1.79831	-2.88688	-3.95433	-4.94416	-5.92243	-6.86693
22.7	0.11991	-0.9289	-1.80124	-2.88987	-3.95598	-4.94597	-5.9236	-6.86832
22.75	0.11524	-0.92908	-1.80395	-2.88849	-3.95539	-4.94681	-5.92411	-6.86836
22.8	0.1148	-0.93007	-1.80683	-2.88955	-3.95716	-4.94937	-5.92392	-6.86499
22.85	0.11443	-0.9303	-1.80758	-2.89272	-3.95578	-4.94998	-5.92317	-6.86479
22.9	0.11115	-0.93257	-1.81296	-2.89309	-3.95857	-4.95139	-5.92441	-6.86534
22.95	0.11211	-0.93312	-1.81783	-2.88911	-3.96016	-4.95178	-5.92425	-6.86581
23	0.11055	-0.93324	-1.8129	-2.89099	-3.95835	-4.95184	-5.92391	-6.86806
23.05	0.10822	-0.93317	-1.81796	-2.89285	-3.9585	-4.95271	-5.92429	-6.86905
23.1	0.10678	-0.93376	-1.81961	-2.89264	-3.9606	-4.95255	-5.92334	-6.86904
23.15	0.1065	-0.93451	-1.82157	-2.89391	-3.95891	-4.95387	-5.92359	-6.87074
23.2	0.10634	-0.93446	-1.81953	-2.8926	-3.96109	-4.95285	-5.92385	-6.86773
23.25	0.1066	-0.93472	-1.82305	-2.89311	-3.96031	-4.95198	-5.92477	-6.87087
23.3	0.10527	-0.9345	-1.82492	-2.89306	-3.95967	-4.95249	-5.92403	-6.87154
23.35	0.1084	-0.93492	-1.82493	-2.89338	-3.9609	-4.95251	-5.9244	-6.86889
23.4	0.10629	-0.93533	-1.82153	-2.89444	-3.9603	-4.95279	-5.92357	-6.86846
23.45	0.10749	-0.93404	-1.82273	-2.89379	-3.96006	-4.95337	-5.92337	-6.86962
23.5	0.10697	-0.93384	-1.8213	-2.89315	-3.96175	-4.9541	-5.92301	-6.87018
23.55	0.10724	-0.93404	-1.81936	-2.89256	-3.96058	-4.9536	-5.92443	-6.86947
23.6	0.10903	-0.93234	-1.82079	-2.89358	-3.96004	-4.95388	-5.92326	-6.86744
23.65	0.11124	-0.93092	-1.82333	-2.89182	-3.9574	-4.95355	-5.92237	-6.86869
23.7	0.10999	-0.9289	-1.82273	-2.891	-3.95456	-4.95253	-5.92192	-6.86882
23.75	0.1116	-0.92871	-1.81873	-2.88984	-3.953	-4.95071	-5.92227	-6.86921
23.8	0.11582	-0.92798	-1.81541	-2.88958	-3.95222	-4.94978	-5.92123	-6.86792
23.85	0.11999	-0.92897	-1.80788	-2.88859	-3.95469	-4.94922	-5.92041	-6.86838
23.9	0.12466	-0.92897	-1.80315	-2.89016	-3.95551	-4.94609	-5.92015	-6.8696
23.95	0.12601	-0.92878	-1.80023	-2.88796	-3.9566	-4.94219	-5.9181	-6.8673
24	0.12645	-0.93062	-1.79534	-2.89075	-3.95925	-4.93904	-5.91885	-6.8667
24.05	0.12794	-0.92986	-1.78789	-2.88831	-3.959	-4.93778	-5.91779	-6.86818
24.1	0.12745	-0.92917	-1.78725	-2.89005	-3.95968	-4.93729	-5.9194	-6.86887
24.15	0.1249	-0.92856	-1.78146	-2.88876	-3.95792	-4.93999	-5.91903	-6.86427
24.2	0.12447	-0.92718	-1.78583	-2.88881	-3.95763	-4.94219	-5.91979	-6.86773
24.25	0.12144	-0.92811	-1.78798	-2.88934	-3.95564	-4.94556	-5.91784	-6.86538
24.3	0.12088	-0.92888	-1.79065	-2.88935	-3.9543	-4.948	-5.91914	-6.8654
24.35	0.11943	-0.92892	-1.79306	-2.89041	-3.95236	-4.94937	-5.91978	-6.86504
24.4	0.11703	-0.92896	-1.79762	-2.88863	-3.95196	-4.95034	-5.91922	-6.86483
24.45	0.11668	-0.92974	-1.79797	-2.88966	-3.95205	-4.95155	-5.9192	-6.8652
24.5	0.11817	-0.92972	-1.79952	-2.89094	-3.95233	-4.95082	-5.91895	-6.86314
24.55	0.11649	-0.93108	-1.79974	-2.89046	-3.95314	-4.95041	-5.91823	-6.86404
24.6	0.11732	-0.9323	-1.80219	-2.89141	-3.95482	-4.95009	-5.91822	-6.86207
24.65	0.11915	-0.93229	-1.80375	-2.8902	-3.95633	-4.94841	-5.9186	-6.86409
24.7	0.11735	-0.93208	-1.79968	-2.89091	-3.95589	-4.94836	-5.91769	-6.863
24.75	0.1161	-0.93329	-1.80303	-2.8928	-3.95822	-4.94758	-5.91927	-6.86393
24.8	0.11431	-0.93345	-1.80103	-2.88943	-3.95564	-4.9484	-5.9173	-6.86167
24.85	0.1124	-0.93218	-1.80519	-2.88983	-3.95576	-4.94952	-5.91866	-6.8594
24.9	0.11198	-0.9325	-1.80495	-2.88849	-3.95522	-4.95034	-5.91653	-6.85844
24.95	0.1132	-0.93192	-1.80465	-2.88844	-3.95502	-4.95055	-5.91663	-6.8587
25	0.11545	-0.93024	-1.80153	-2.88832	-3.95477	-4.95057	-5.91613	-6.85894
25.05	0.11788	-0.931	-1.80108	-2.88476	-3.95294	-4.95027	-5.91575	-6.85818
25.1	0.11997	-0.92847	-1.7918	-2.88368	-3.95265	-4.94814	-5.91525	-6.85589
25.15	0.12499	-0.92546	-1.78819	-2.88351	-3.94896	-4.94487	-5.91474	-6.85643
25.2	0.13082	-0.92514	-1.78074	-2.87993	-3.94429	-4.94188	-5.91226	-6.85371
25.25	0.13532	-0.92495	-1.77171	-2.8791	-3.93928	-4.94018	-5.91319	-6.85432
25.3	0.14367	-0.92518	-1.77086	-2.87983	-3.94224	-4.93774	-5.91328	-6.85266
25.35	0.14298	-0.92435	-1.76417	-2.87679	-3.9408	-4.93763	-5.91167	-6.85239
25.4	0.14011	-0.92597	-1.76369	-2.87728	-3.94504	-4.93931	-5.91133	-6.85189
25.45	0.13847	-0.92608	-1.7589	-2.87443	-3.94838	-4.94204	-5.90854	-6.85201
25.5	0.13252	-0.92706	-1.76393	-2.87599	-3.94843	-4.94502	-5.9107	-6.85069
25.55	0.12863	-0.92896	-1.76443	-2.87498	-3.95071	-4.94552	-5.90997	-6.85045
25.6	0.12946	-0.93054	-1.76273	-2.87802	-3.95243	-4.9448	-5.91042	-6.84892
25.65	0.12831	-0.93002	-1.76861	-2.87674	-3.95238	-4.94422	-5.91013	-6.84843
25.7	0.13061	-0.93124	-1.76811	-2.87778	-3.9535	-4.94222	-5.90994	-6.84616
25.75	0.12841	-0.931	-1.76848	-2.87965	-3.95545	-4.94093	-5.9109	-6.84754
25.8	0.12939	-0.92957	-1.76865	-2.87933	-3.95555	-4.94036	-5.90992	-6.84145
25.85	0.12848	-0.92932	-1.7635	-2.88011	-3.95735	-4.94062	-5.90952	-6.84171
25.9	0.12836	-0.93076	-1.76809	-2.87927	-3.95484	-4.94053	-5.90813	-6.84287
25.95	0.12772	-0.93059	-1.76893	-2.88171	-3.95236	-4.94159	-5.90861	-6.8422
26	0.13047	-0.93101	-1.77535	-2.88124	-3.952	-4.94264	-5.90871	-6.84253
26.05	0.12721	-0.93177	-1.77572	-2.88237	-3.95332	-4.9422	-5.90814	-6.84068
26.1	0.12359	-0.93137	-1.78113	-2.88321	-3.95411	-4.94337	-5.90653	-6.84019
26.15	0.12185	-0.93323	-1.77987	-2.88321	-3.95432	-4.94339	-5.90573	-6.83997
26.2	0.11953	-0.93351	-1.7867	-2.8837	-3.95814	-4.94507	-5.90641	-6.83817
26.25	0.1179	-0.93466	-1.7927	-2.882	-3.9594	-4.94581	-5.90512	-6.83707
26.3	0.11496	-0.93638	-1.78702	-2.88158	-3.96002	-4.94684	-5.90592	-6.83576
26.35	0.11728	-0.93487	-1.78889	-2.8815	-3.96105	-4.94741	-5.90306	-6.83584
26.4	0.11537	-0.93436	-1.7899	-2.88176	-3.95951	-4.94681	-5.90273	-6.83335
26.45	0.12023	-0.93454	-1.7877	-2.8809	-3.95964	-4.94506	-5.90099	-6.8342
26.5	0.12111	-0.93381	-1.78593	-2.87951	-3.95883	-4.94404	-5.89912	-6.8326
26.55	0.12382	-0.93303	-1.78351	-2.87816	-3.95852	-4.94132	-5.89757	-6.82984
26.6	0.12655	-0.93319	-1.78287	-2.87646	-3.95953	-4.93968	-5.8948	-6.82695
26.65	0.12894	-0.93276	-1.77754	-2.87392	-3.9588	-4.93489	-5.89246	-6.82606
26.7	0.13158	-0.9309	-1.76949	-2.87252	-3.95863	-4.93159	-5.89032	-6.82657
26.75	0.13929	-0.92935	-1.75871	-2.8691	-3.95356	-4.92725	-5.89005	-6.8248
26.8	0.14374	-0.92665	-1.74895	-2.86893	-3.95469	-4.92221	-5.88787	-6.82467
26.85	0.15349	-0.92415	-1.74102	-2.86513	-3.95082	-4.91895	-5.88552	-6.81913
26.9	0.16112	-0.92066	-1.72146	-2.86124	-3.94719	-4.91609	-5.8824	-6.81955
26.95	0.17232	-0.91697	-1.70712	-2.85758	-3.94049	-4.91182	-5.88107	-6.81936
27	0.1847	-0.91197	-1.68969	-2.85365	-3.93303	-4.90776	-5.87889	-6.81934
27.05	0.2012	-0.90694	-1.67104	-2.85144	-3.92174	-4.90309	-5.86998	-6.8157
27.1	0.21131	-0.90216	-1.64911	-2.84358	-3.91134	-4.89505	-5.86996	-6.81419
27.15	0.22363	-0.89787	-1.63097	-2.84161	-3.8982	-4.88715	-5.86552	-6.81487
27.2	0.23392	-0.89254	-1.6132	-2.83514	-3.89496	-4.87255	-5.86122	-6.8142
27.25	0.2447	-0.88691	-1.59236	-2.82942	-3.89409	-4.85782	-5.85543	-6.81285
27.3	0.25433	-0.88346	-1.55758	-2.82597	-3.89539	-4.84063	-5.84864	-6.81357
27.35	0.26635	-0.88091	-1.5256	-2.81758	-3.89866	-4.81985	-5.84418	-6.81458
27.4	0.29173	-0.87713	-1.48311	-2.80841	-3.90259	-4.79604	-5.83672	-6.81038
27.45	0.31738	-0.87223	-1.43254	-2.80162	-3.90651	-4.77524	-5.83157	-6.81268
27.5	0.34922	-0.86762	-1.3766	-2.79253	-3.90586	-4.75562	-5.81974	-6.81312
27.55	0.38278	-0.85757	-1.30079	-2.78658	-3.90345	-4.74195	-5.81148	-6.8104
27.6	0.43033	-0.84734	-1.22917	-2.78026	-3.89854	-4.73488	-5.80153	-6.8121
27.65	0.47527	-0.83234	-1.15263	-2.77328	-3.88256	-4.73673	-5.79353	-6.81485
27.7	0.53842	-0.81451	-1.0928	-2.76658	-3.85767	-4.75077	-5.78212	-6.8159
27.75	0.59284	-0.79457	-1.03569	-2.76177	-3.81638	-4.77362	-5.7732	-6.81755
27.8	0.63823	-0.77858	-1.00164	-2.76052	-3.76971	-4.80284	-5.76295	-6.82111
27.85	0.64943	-0.76508	-1	-2.76184	-3.73011	-4.83268	-5.75769	-6.81995
27.9	0.6292	-0.76133	-1.03199	-2.76383	-3.72156	-4.85922	-5.74821	-6.82152
27.95	0.57694	-0.76555	-1.09235	-2.76811	-3.74558	-4.8789	-5.74255	-6.8236
28	0.51175	-0.77408	-1.18075	-2.77574	-3.79197	-4.89101	-5.7375	-6.82305
28.05	0.43631	-0.78851	-1.26957	-2.78313	-3.83482	-4.89941	-5.73854	-6.82828
28.1	0.3752	-0.80394	-1.34735	-2.79091	-3.86377	-4.90549	-5.73925	-6.83028
28.15	0.32357	-0.82234	-1.41594	-2.80513	-3.88794	-4.90799	-5.7422	-6.83227
28.2	0.28592	-0.83939	-1.46013	-2.80899	-3.9023	-4.91071	-5.7493	-6.83531
28.25	0.25729	-0.85241	-1.5057	-2.81892	-3.91582	-4.91372	-5.7559	-6.83821
28.3	0.23851	-0.86552	-1.54086	-2.82499	-3.92254	-4.9151	-5.76653	-6.84126
28.35	0.22561	-0.87599	-1.56483	-2.83165	-3.92789	-4.91914	-5.77495	-6.8425
28.4	0.22139	-0.88199	-1.57789	-2.83699	-3.93131	-4.92125	-5.78446	-6.84594
28.45	0.22275	-0.88709	-1.59134	-2.84233	-3.93181	-4.92532	-5.79324	-6.84941
28.5	0.21841	-0.89171	-1.6095	-2.84367	-3.92192	-4.92813	-5.80314	-6.85153
28.55	0.22041	-0.8938	-1.61669	-2.84702	-3.92212	-4.93081	-5.81297	-6.85236
28.6	0.21864	-0.89533	-1.62639	-2.84938	-3.92954	-4.93261	-5.81897	-6.8565
28.65	0.21697	-0.89774	-1.6417	-2.85159	-3.93048	-4.93128	-5.82765	-6.85753
28.7	0.21807	-0.90003	-1.64722	-2.85221	-3.93423	-4.93096	-5.83322	-6.85876
28.75	0.21396	-0.90292	-1.64874	-2.85384	-3.93706	-4.9287	-5.83911	-6.8621
28.8	0.21728	-0.9035	-1.64958	-2.85444	-3.94197	-4.92603	-5.84525	-6.86295
28.85	0.22048	-0.90574	-1.65179	-2.85772	-3.94421	-4.92215	-5.85194	-6.86441
28.9	0.21763	-0.90609	-1.64993	-2.85696	-3.94494	-4.91822	-5.85653	-6.86608
28.95	0.21978	-0.90619	-1.64394	-2.85868	-3.94629	-4.91449	-5.86152	-6.86851
29	0.21788	-0.90553	-1.64688	-2.86029	-3.94454	-4.91253	-5.86421	-6.87154
29.05	0.2162	-0.90493	-1.64359	-2.8607	-3.94243	-4.91164	-5.86992	-6.87193
29.1	0.2186	-0.90261	-1.65037	-2.86245	-3.93835	-4.91263	-5.87325	-6.87472
29.15	0.2188	-0.9013	-1.65714	-2.86089	-3.93271	-4.91452	-5.87354	-6.87502
29.2	0.2178	-0.89928	-1.65723	-2.86378	-3.9277	-4.91609	-5.88049	-6.87529
29.25	0.21573	-0.89887	-1.65559	-2.86377	-3.91885	-4.91648	-5.8826	-6.87625
29.3	0.21671	-0.89795	-1.65656	-2.86365	-3.91246	-4.91325	-5.8864	-6.87811
29.35	0.2183	-0.89755	-1.65929	-2.86837	-3.90611	-4.91398	-5.88914	-6.88075
29.4	0.2197	-0.8982	-1.65881	-2.86811	-3.90587	-4.91718	-5.8908	-6.88023
29.45	0.22467	-0.90171	-1.65447	-2.87034	-3.90668	-4.91884	-5.89346	-6.8828
29.5	0.2229	-0.90376	-1.65856	-2.87173	-3.91147	-4.92374	-5.8945	-6.88332
29.55	0.21692	-0.90721	-1.66582	-2.87347	-3.91861	-4.92843	-5.89738	-6.8833
29.6	0.20876	-0.91027	-1.67462	-2.87343	-3.92587	-4.9326	-5.89922	-6.88391
29.65	0.19765	-0.91499	-1.68458	-2.87524	-3.93406	-4.93616	-5.90096	-6.88462
29.7	0.1878	-0.91792	-1.69837	-2.87651	-3.93929	-4.94001	-5.90208	-6.88597
29.75	0.17767	-0.92104	-1.7086	-2.87955	-3.94512	-4.94058	-5.90478	-6.8873
29.8	0.16548	-0.9234	-1.71738	-2.8802	-3.94686	-4.94193	-5.90629	-6.89038
29.85	0.15454	-0.92685	-1.72828	-2.87969	-3.94774	-4.94314	-5.90772	-6.89076
29.9	0.14967	-0.92799	-1.7348	-2.88018	-3.94787	-4.94366	-5.9083	-6.89116
29.95	0.14635	-0.93004	-1.74036	-2.88205	-3.95056	-4.94509	-5.91006	-6.89185
30	0.14595	-0.93206	-1.74819	-2.88321	-3.95182	-4.94668	-5.91135	-6.89591
30.05	0.1438	-0.93355	-1.74988	-2.88281	-3.95353	-4.94832	-5.91266	-6.89457
30.1	0.13983	-0.934	-1.75588	-2.88617	-3.95559	-4.94803	-5.91349	-6.89568
30.15	0.13759	-0.93592	-1.76265	-2.88827	-3.95782	-4.94872	-5.91372	-6.89822
30.2	0.13578	-0.93773	-1.76494	-2.88903	-3.95848	-4.94937	-5.91531	-6.8998
30.25	0.13456	-0.93827	-1.77135	-2.88923	-3.96021	-4.94823	-5.91737	-6.89791
30.3	0.13418	-0.93977	-1.7708	-2.89077	-3.96308	-4.94749	-5.91718	-6.89765
30.35	0.13284	-0.94024	-1.77131	-2.89324	-3.96194	-4.94815	-5.91815	-6.89888
30.4	0.13151	-0.94187	-1.77711	-2.89517	-3.96336	-4.94784	-5.92045	-6.89934
30.45	0.13326	-0.9425	-1.777	-2.8954	-3.9647	-4.94629	-5.92108	-6.90195
30.5	0.13023	-0.94259	-1.7751	-2.89571	-3.96367	-4.94772	-5.9217	-6.90303
30.55	0.12776	-0.94362	-1.77445	-2.89717	-3.96565	-4.94756	-5.92355	-6.90402
30.6	0.12487	-0.94385	-1.77155	-2.89871	-3.96575	-4.94795	-5.92295	-6.9043
30.65	0.12624	-0.94406	-1.77508	-2.89793	-3.96567	-4.94763	-5.92595	-6.90398
30.7	0.12552	-0.9431	-1.78026	-2.89786	-3.96556	-4.94814	-5.92581	-6.90517
30.75	0.12289	-0.94432	-1.77733	-2.90166	-3.96578	-4.94861	-5.92622	-6.90417
30.8	0.12409	-0.94386	-1.77939	-2.90026	-3.96555	-4.94921	-5.92695	-6.90682
30.85	0.12495	-0.94459	-1.78437	-2.9014	-3.96509	-4.95005	-5.92679	-6.90584
30.9	0.12538	-0.94489	-1.78172	-2.90117	-3.96694	-4.95058	-5.92922	-6.90824
30.95	0.12758	-0.9443	-1.78003	-2.90051	-3.967	-4.95134	-5.929	-6.90708
31	0.12709	-0.94439	-1.78044	-2.90125	-3.96775	-4.9523	-5.9286	-6.90928
31.05	0.12741	-0.94329	-1.78409	-2.90114	-3.96703	-4.95234	-5.93049	-6.91076
31.1	0.12731	-0.94248	-1.78517	-2.90078	-3.96611	-4.95232	-5.93114	-6.91133
31.15	0.126	-0.94302	-1.78626	-2.90352	-3.96625	-4.95278	-5.93269	-6.9093
31.2	0.12659	-0.94291	-1.78428	-2.90336	-3.96424	-4.95082	-5.93195	-6.91222
31.25	0.12611	-0.94257	-1.79031	-2.90453	-3.96257	-4.95149	-5.93284	-6.91091
31.3	0.12339	-0.94195	-1.78765	-2.90279	-3.96206	-4.95116	-5.93439	-6.91242
31.35	0.12448	-0.94169	-1.78801	-2.90466	-3.96177	-4.94983	-5.93433	-6.91254
31.4	0.12457	-0.94008	-1.78566	-2.90331	-3.96114	-4.94795	-5.93549	-6.91233
31.45	0.12723	-0.941	-1.78881	-2.90602	-3.95663	-4.94934	-5.93534	-6.91503
31.5	0.12772	-0.94023	-1.77998	-2.9054	-3.95733	-4.94837	-5.93622	-6.91383
31.55	0.12844	-0.94034	-1.78159	-2.90575	-3.95521	-4.94825	-5.93732	-6.91434
31.6	0.13022	-0.94059	-1.78112	-2.90474	-3.95504	-4.94805	-5.93767	-6.91654
31.65	0.13011	-0.94081	-1.78733	-2.90711	-3.95483	-4.94754	-5.93801	-6.91597
31.7	0.13152	-0.94171	-1.7886	-2.90783	-3.95468	-4.94684	-5.93929	-6.91633
31.75	0.12963	-0.94211	-1.78464	-2.90799	-3.9551	-4.94708	-5.93823	-6.91578
31.8	0.13039	-0.9423	-1.78844	-2.90699	-3.95571	-4.94579	-5.93949	-6.91556
31.85	0.12827	-0.94154	-1.78744	-2.90925	-3.95625	-4.94762	-5.9388	-6.91906
31.9	0.13089	-0.94378	-1.78727	-2.91002	-3.95806	-4.94831	-5.94011	-6.91643
31.95	0.12784	-0.9447	-1.79219	-2.91052	-3.96062	-4.94928	-5.94102	-6.91939
32	0.12342	-0.94591	-1.79537	-2.91046	-3.96154	-4.95223	-5.94076	-6.91847
32.05	0.11977	-0.94611	-1.79934	-2.91158	-3.96336	-4.95595	-5.94118	-6.91824
32.1	0.11231	-0.9473	-1.80348	-2.91368	-3.96313	-4.95703	-5.94247	-6.92091
32.15	0.11124	-0.94868	-1.81171	-2.91312	-3.96638	-4.95923	-5.94353	-6.91975
32.2	0.10411	-0.94962	-1.81652	-2.914	-3.96688	-4.96133	-5.94174	-6.92119
32.25	0.09851	-0.95183	-1.82249	-2.91607	-3.96719	-4.96074	-5.94424	-6.91983
32.3	0.0975	-0.95212	-1.82507	-2.91678	-3.96871	-4.96343	-5.94285	-6.92032
32.35	0.09515	-0.95293	-1.82979	-2.91714	-3.96681	-4.96257	-5.94426	-6.92151
32.4	0.0916	-0.95239	-1.82868	-2.9191	-3.96819	-4.96345	-5.9447	-6.9221
32.45	0.09073	-0.95467	-1.83155	-2.92113	-3.96839	-4.96309	-5.94444	-6.92386
32.5	0.08766	-0.95511	-1.83412	-2.92021	-3.97033	-4.96398	-5.94563	-6.92299
32.55	0.08631	-0.95598	-1.83515	-2.92218	-3.9703	-4.963	-5.94624	-6.9219
32.6	0.08542	-0.95552	-1.83803	-2.92186	-3.97139	-4.96314	-5.94703	-6.92349
32.65	0.08508	-0.95603	-1.84108	-2.92241	-3.97173	-4.96239	-5.9461	-6.92222
32.7	0.08464	-0.95621	-1.83905	-2.92343	-3.97225	-4.96318	-5.94569	-6.92307
32.75	0.08602	-0.95681	-1.84271	-2.92218	-3.97154	-4.96241	-5.94689	-6.92239
32.8	0.08562	-0.95714	-1.84628	-2.9235	-3.97317	-4.96299	-5.94653	-6.92522
32.85	0.08759	-0.958	-1.8424	-2.92343	-3.97344	-4.96388	-5.94743	-6.92522
32.9	0.08766	-0.95728	-1.84197	-2.92402	-3.97189	-4.96409	-5.94767	-6.92397
32.95	0.08785	-0.95701	-1.849	-2.9252	-3.97125	-4.96433	-5.94768	-6.9249
33	0.08946	-0.95743	-1.84529	-2.9263	-3.97003	-4.96404	-5.94837	-6.92755
33.05	0.0914	-0.95734	-1.84661	-2.92633	-3.96939	-4.96468	-5.94868	-6.9272
33.1	0.09122	-0.95696	-1.85089	-2.92719	-3.97191	-4.96526	-5.94797	-6.92444
33.15	0.08876	-0.95701	-1.8486	-2.9251	-3.97185	-4.9646	-5.94915	-6.92485
33.2	0.09228	-0.95709	-1.84741	-2.9264	-3.97058	-4.96513	-5.94834	-6.92724
33.25	0.08771	-0.95574	-1.84862	-2.92583	-3.9726	-4.96523	-5.94918	-6.92666
33.3	0.08857	-0.95606	-1.85144	-2.92492	-3.97265	-4.96508	-5.94852	-6.92648
33.35	0.08867	-0.95458	-1.8517	-2.92443	-3.97183	-4.96494	-5.94839	-6.92402
33.4	0.08915	-0.9529	-1.84881	-2.92332	-3.9695	-4.96451	-5.94908	-6.92625
33.45	0.09036	-0.95141	-1.85062	-2.92294	-3.96638	-4.96493	-5.94819	-6.92729
33.5	0.09467	-0.95087	-1.8494	-2.92316	-3.96423	-4.96353	-5.94779	-6.92574
33.55	0.0954	-0.94812	-1.84197	-2.92106	-3.95981	-4.96242	-5.94823	-6.9259
33.6	0.09903	-0.94875	-1.84223	-2.91992	-3.95655	-4.96045	-5.94836	-6.92463
33.65	0.10455	-0.9493	-1.83841	-2.91999	-3.9557	-4.96043	-5.94766	-6.92548
33.7	0.10922	-0.94958	-1.83622	-2.91965	-3.95491	-4.95843	-5.94884	-6.92841
33.75	0.1093	-0.94974	-1.83482	-2.92032	-3.9567	-4.95781	-5.94838	-6.92723
33.8	0.10912	-0.94955	-1.83497	-2.91958	-3.95875	-4.95804	-5.94796	-6.92763
33.85	0.10646	-0.95124	-1.83488	-2.92058	-3.95868	-4.95949	-5.94848	-6.92767
33.9	0.10309	-0.95165	-1.83246	-2.92093	-3.96179	-4.95936	-5.94891	-6.92853
33.95	0.10085	-0.95279	-1.8361	-2.92128	-3.96378	-4.95882	-5.94829	-6.92927
34	0.10226	-0.95334	-1.83699	-2.92334	-3.96658	-4.95916	-5.94827	-6.92876
34.05	0.09896	-0.95457	-1.83739	-2.92166	-3.96801	-4.95901	-5.95026	-6.93019
34.1	0.1003	-0.95439	-1.84023	-2.92426	-3.96641	-4.95925	-5.94971	-6.93206
34.15	0.10198	-0.95581	-1.83774	-2.9258	-3.96782	-4.96061	-5.94986	-6.93146
34.2	0.09568	-0.95588	-1.84297	-2.92463	-3.96712	-4.96106	-5.95111	-6.93035
34.25	0.09323	-0.95595	-1.84547	-2.92477	-3.96534	-4.96178	-5.95092	-6.93213
34.3	0.09258	-0.95445	-1.84604	-2.92704	-3.96508	-4.96268	-5.95219	-6.92997
34.35	0.08982	-0.95547	-1.84792	-2.92671	-3.96532	-4.9628	-5.95225	-6.93128
34.4	0.08729	-0.95573	-1.8484	-2.92811	-3.96349	-4.96258	-5.95083	-6.92876
34.45	0.08581	-0.95591	-1.84703	-2.92751	-3.96509	-4.96338	-5.9525	-6.93148
34.5	0.08924	-0.95493	-1.84883	-2.92797	-3.96575	-4.96285	-5.95343	-6.93171
34.55	0.08946	-0.95657	-1.85103	-2.92869	-3.96783	-4.9632	-5.9523	-6.93056
34.6	0.09304	-0.95691	-1.85021	-2.92845	-3.96758	-4.96271	-5.95264	-6.93312
34.65	0.09414	-0.9578	-1.84679	-2.92948	-3.96838	-4.96147	-5.95304	-6.93152
34.7	0.09514	-0.95882	-1.84731	-2.9302	-3.96791	-4.96142	-5.95356	-6.93344
34.75	0.09647	-0.95955	-1.8479	-2.93087	-3.97067	-4.96067	-5.9543	-6.93454
34.8	0.0937	-0.96065	-1.85167	-2.93242	-3.97034	-4.9592	-5.95397	-6.93476
34.85	0.09175	-0.96134	-1.85361	-2.93212	-3.97318	-4.96098	-5.95437	-6.93413
34.9	0.09044	-0.96136	-1.85002	-2.93088	-3.97389	-4.96156	-5.95439	-6.93435
34.95	0.08953	-0.96314	-1.85354	-2.93323	-3.97541	-4.96268	-5.95574	-6.93489
35	0.0895	-0.9633	-1.85612	-2.93325	-3.97556	-4.96441	-5.95565	-6.93584
35.05	0.0853	-0.96391	-1.85788	-2.93501	-3.97697	-4.96557	-5.95647	-6.93545
35.1	0.08379	-0.96464	-1.85832	-2.93338	-3.97533	-4.96608	-5.95564	-6.9359
35.15	0.08323	-0.96463	-1.86103	-2.93523	-3.97657	-4.96581	-5.95671	-6.937
35.2	0.08342	-0.96532	-1.86453	-2.93687	-3.97808	-4.96638	-5.95648	-6.93817
35.25	0.08064	-0.96612	-1.8646	-2.93717	-3.97673	-4.96666	-5.95639	-6.93725
35.3	0.07788	-0.96518	-1.86522	-2.93717	-3.97621	-4.96624	-5.95668	-6.93749
35.35	0.07783	-0.96667	-1.86753	-2.94015	-3.97799	-4.96751	-5.95727	-6.93733
35.4	0.0757	-0.966	-1.87009	-2.94057	-3.97708	-4.9667	-5.95816	-6.93873
35.45	0.07677	-0.96848	-1.86961	-2.93955	-3.97684	-4.96686	-5.95805	-6.93937
35.5	0.07527	-0.96833	-1.87364	-2.9406	-3.97607	-4.96777	-5.95857	-6.93899
35.55	0.07461	-0.9699	-1.87475	-2.94123	-3.97778	-4.96885	-5.95825	-6.94048
35.6	0.0751	-0.97005	-1.87511	-2.94125	-3.97592	-4.96889	-5.9592	-6.9395
35.65	0.07417	-0.97036	-1.87725	-2.94219	-3.97706	-4.96878	-5.95938	-6.93667
35.7	0.07136	-0.96932	-1.87619	-2.94273	-3.97499	-4.96921	-5.9603	-6.93708
35.75	0.0736	-0.96754	-1.87506	-2.94383	-3.97599	-4.96848	-5.95946	-6.93595
35.8	0.07285	-0.96712	-1.87954	-2.94401	-3.97806	-4.96949	-5.96061	-6.93594
35.85	0.06886	-0.96842	-1.88137	-2.94471	-3.97835	-4.96842	-5.96001	-6.93803
35.9	0.06868	-0.96977	-1.8838	-2.94388	-3.98023	-4.96996	-5.9609	-6.93767
35.95	0.06972	-0.96976	-1.88301	-2.94497	-3.97943	-4.97017	-5.96118	-6.93819
36	0.06632	-0.96905	-1.88719	-2.94604	-3.97901	-4.97109	-5.96117	-6.93987
36.05	0.06518	-0.97023	-1.88781	-2.94545	-3.97934	-4.97197	-5.96131	-6.94192
36.1	0.06748	-0.96974	-1.89201	-2.94725	-3.97954	-4.97148	-5.9614	-6.9401
36.15	0.06455	-0.97055	-1.89231	-2.94715	-3.97892	-4.97321	-5.9614	-6.94047
36.2	0.06443	-0.97058	-1.89446	-2.94782	-3.97985	-4.97356	-5.9615	-6.94114
36.25	0.0638	-0.9704	-1.89388	-2.94853	-3.98003	-4.97436	-5.9633	-6.9413
36.3	0.06282	-0.97101	-1.89479	-2.94793	-3.98084	-4.97419	-5.96178	-6.93786
36.35	0.06108	-0.971	-1.89443	-2.94919	-3.98092	-4.97516	-5.96242	-6.93333
36.4	0.05985	-0.96937	-1.89954	-2.94949	-3.98095	-4.97509	-5.96375	-6.92756
36.45	0.05891	-0.97058	-1.90311	-2.95039	-3.97981	-4.97635	-5.96303	-6.92066
36.5	0.05805	-0.97174	-1.90082	-2.94887	-3.97874	-4.97628	-5.96332	-6.91598
36.55	0.05795	-0.97103	-1.90082	-2.95051	-3.9786	-4.97669	-5.96381	-6.91085
36.6	0.05776	-0.97231	-1.90188	-2.9506	-3.98026	-4.97681	-5.96371	-6.9136
36.65	0.05627	-0.97167	-1.90303	-2.95006	-3.98016	-4.97697	-5.96399	-6.91892
36.7	0.05606	-0.97233	-1.90464	-2.95118	-3.98034	-4.97639	-5.96434	-6.92437
36.75	0.05636	-0.97288	-1.90599	-2.95172	-3.98208	-4.9773	-5.96423	-6.93121
36.8	0.0552	-0.97208	-1.90652	-2.95122	-3.982	-4.97733	-5.96393	-6.93614
36.85	0.05406	-0.97262	-1.90579	-2.9521	-3.98264	-4.97807	-5.96424	-6.94123
36.9	0.05353	-0.97372	-1.90965	-2.95105	-3.98169	-4.97755	-5.96446	-6.94288
36.95	0.05418	-0.97346	-1.91117	-2.95345	-3.98279	-4.97697	-5.96461	-6.94502
37	0.05256	-0.97379	-1.90712	-2.95328	-3.9841	-4.97719	-5.96565	-6.94499
37.05	0.05466	-0.9733	-1.90963	-2.95352	-3.98246	-4.97797	-5.96602	-6.94626
37.1	0.05137	-0.97417	-1.91011	-2.95345	-3.98288	-4.97717	-5.96458	-6.94784
37.15	0.05235	-0.97427	-1.91067	-2.95294	-3.98307	-4.97722	-5.96535	-6.94742
37.2	0.05394	-0.9745	-1.9107	-2.95377	-3.98278	-4.97701	-5.96565	-6.94718
37.25	0.05282	-0.97466	-1.90914	-2.95604	-3.98359	-4.97707	-5.96549	-6.9484
37.3	0.05154	-0.97449	-1.90803	-2.95408	-3.98294	-4.97702	-5.9671	-6.9481
37.35	0.05137	-0.974	-1.91001	-2.95335	-3.98341	-4.97756	-5.96614	-6.94844
37.4	0.05162	-0.97469	-1.91136	-2.9532	-3.98245	-4.97666	-5.96623	-6.94902
37.45	0.04921	-0.9743	-1.90866	-2.95304	-3.98288	-4.97782	-5.96676	-6.94927
37.5	0.05212	-0.9742	-1.90911	-2.95212	-3.98262	-4.97666	-5.9664	-6.9478
37.55	0.05173	-0.97404	-1.90657	-2.95322	-3.98344	-4.97682	-5.96638	-6.94851
37.6	0.05387	-0.97374	-1.90494	-2.95337	-3.98182	-4.97639	-5.9675	-6.94864
37.65	0.05353	-0.9727	-1.90698	-2.95445	-3.9811	-4.97533	-5.96752	-6.95005
37.7	0.05252	-0.97188	-1.90325	-2.95517	-3.9805	-4.97655	-5.96721	-6.95002
37.75	0.05509	-0.97317	-1.90522	-2.95218	-3.98258	-4.97649	-5.96788	-6.95026
37.8	0.05069	-0.97339	-1.90632	-2.9548	-3.98115	-4.97547	-5.96679	-6.95032
37.85	0.05106	-0.97362	-1.90557	-2.9522	-3.9798	-4.97601	-5.96733	-6.95054
37.9	0.0509	-0.97362	-1.90573	-2.95287	-3.9799	-4.97715	-5.96709	-6.94865
37.95	0.0511	-0.97415	-1.9103	-2.95455	-3.98079	-4.97722	-5.96705	-6.95007
38	0.04926	-0.97476	-1.90739	-2.954	-3.98019	-4.97775	-5.9671	-6.94958
38.05	0.05227	-0.97396	-1.90964	-2.95376	-3.9807	-4.97696	-5.96702	-6.94995
38.1	0.05038	-0.97394	-1.90873	-2.95416	-3.98238	-4.97733	-5.9674	-6.95108
38.15	0.05099	-0.97436	-1.90881	-2.95384	-3.98307	-4.97692	-5.96829	-6.95011
38.2	0.05303	-0.97537	-1.91079	-2.95267	-3.98222	-4.9772	-5.96888	-6.94996
38.25	0.05234	-0.97494	-1.91122	-2.95412	-3.98246	-4.97661	-5.96799	-6.95157
38.3	0.05197	-0.97455	-1.90756	-2.95364	-3.98343	-4.97745	-5.96706	-6.9511
38.35	0.05193	-0.97466	-1.90998	-2.95405	-3.98301	-4.97736	-5.96745	-6.95153
38.4	0.0531	-0.97491	-1.90631	-2.95158	-3.98324	-4.97631	-5.96953	-6.95177
38.45	0.05177	-0.97521	-1.9068	-2.95345	-3.98189	-4.97686	-5.96805	-6.95187
38.5	0.05133	-0.97494	-1.90701	-2.9536	-3.98218	-4.97677	-5.96944	-6.95192
38.55	0.05139	-0.97479	-1.90748	-2.95514	-3.98303	-4.9762	-5.96979	-6.95122
38.6	0.05283	-0.97569	-1.90318	-2.95519	-3.98467	-4.97571	-5.96884	-6.95237
38.65	0.05299	-0.97482	-1.90213	-2.95506	-3.98335	-4.97524	-5.9691	-6.95159
38.7	0.05302	-0.97493	-1.90702	-2.95393	-3.98386	-4.97478	-5.96902	-6.94995
38.75	0.05487	-0.97537	-1.90429	-2.95429	-3.98199	-4.9745	-5.9695	-6.95099
38.8	0.0557	-0.97545	-1.9077	-2.95455	-3.98172	-4.97323	-5.96825	-6.95257
38.85	0.05724	-0.97531	-1.90815	-2.95386	-3.9819	-4.97283	-5.96882	-6.95013
38.9	0.05523	-0.9752	-1.90867	-2.95467	-3.98116	-4.97275	-5.96874	-6.95082
38.95	0.05547	-0.97608	-1.90969	-2.95388	-3.9819	-4.97353	-5.9689	-6.95137
39	0.05305	-0.97663	-1.90703	-2.95472	-3.98286	-4.97329	-5.96916	-6.95338
39.05	0.05067	-0.97645	-1.90929	-2.95682	-3.98367	-4.97372	-5.97022	-6.95268
39.1	0.04952	-0.97592	-1.91236	-2.95769	-3.98378	-4.97565	-5.97009	-6.95194
39.15	0.05232	-0.97679	-1.91189	-2.95448	-3.98401	-4.97516	-5.97003	-6.95187
39.2	0.05213	-0.97655	-1.91139	-2.95789	-3.98391	-4.97637	-5.96926	-6.95179
39.25	0.05056	-0.97635	-1.91627	-2.95626	-3.98342	-4.97604	-5.97017	-6.95344
39.3	0.051	-0.97613	-1.91233	-2.95487	-3.98333	-4.97683	-5.97038	-6.95198
39.35	0.05073	-0.97522	-1.91749	-2.95657	-3.98297	-4.97698	-5.97099	-6.95258
39.4	0.05263	-0.97543	-1.91475	-2.95655	-3.98429	-4.9777	-5.96967	-6.95215
39.45	0.05322	-0.9765	-1.91733	-2.95508	-3.98225	-4.97701	-5.97071	-6.95246
39.5	0.05229	-0.97612	-1.91275	-2.9564	-3.98276	-4.9767	-5.97065	-6.95242
39.55	0.05501	-0.97636	-1.91441	-2.95719	-3.98316	-4.97611	-5.97047	-6.95326
39.6	0.055	-0.97701	-1.91303	-2.95491	-3.98197	-4.97591	-5.97067	-6.95187
39.65	0.0547	-0.97673	-1.91404	-2.9554	-3.98262	-4.97571	-5.97032	-6.95147
39.7	0.05684	-0.97694	-1.91233	-2.95779	-3.98216	-4.97578	-5.97103	-6.95233
39.75	0.05493	-0.97736	-1.91418	-2.95713	-3.9821	-4.97525	-5.97144	-6.95265
39.8	0.05595	-0.97647	-1.91028	-2.95792	-3.98339	-4.97567	-5.97049	-6.95317
39.85	0.05452	-0.97679	-1.91218	-2.95696	-3.98511	-4.97612	-5.9712	-6.95326
39.9	0.05446	-0.97765	-1.91367	-2.95718	-3.9833	-4.97597	-5.97235	-6.9511
39.95	0.0524	-0.97656	-1.91705	-2.95682	-3.98231	-4.97712	-5.97126	-6.95121
40	0.05289	-0.97654	-1.91731	-2.95625	-3.98377	-4.97786	-5.9721	-6.95362
40.05	0.052	-0.97664	-1.91585	-2.9578	-3.98417	-4.97786	-5.97102	-6.95289
40.1	0.05193	-0.9774	-1.91979	-2.95715	-3.98401	-4.97794	-5.97168	-6.95216
40.15	0.05051	-0.97713	-1.91837	-2.95787	-3.98371	-4.97879	-5.9705	-6.95261
40.2	0.05177	-0.97721	-1.92153	-2.95904	-3.98299	-4.97913	-5.97242	-6.9528
40.25	0.04835	-0.97793	-1.92064	-2.95783	-3.98446	-4.97899	-5.97142	-6.95379
40.3	0.04833	-0.97695	-1.92077	-2.95788	-3.98392	-4.97897	-5.97154	-6.95125
40.35	0.04914	-0.97697	-1.92006	-2.95761	-3.98508	-4.97946	-5.97125	-6.95366
40.4	0.0487	-0.97739	-1.91894	-2.9608	-3.98273	-4.97974	-5.97173	-6.95294
40.45	0.04698	-0.978	-1.92407	-2.95789	-3.98372	-4.97997	-5.97116	-6.95408
40.5	0.04704	-0.97787	-1.92584	-2.95925	-3.98387	-4.97934	-5.97167	-6.95412
40.55	0.04723	-0.9775	-1.92501	-2.96095	-3.98253	-4.9803	-5.97204	-6.95327
40.6	0.04718	-0.97737	-1.92848	-2.95832	-3.98491	-4.98009	-5.9716	-6.95263
40.65	0.04686	-0.97767	-1.92769	-2.95933	-3.9826	-4.97956	-5.97095	-6.95337
40.7	0.04525	-0.97798	-1.92889	-2.95811	-3.98248	-4.9807	-5.97167	-6.95212
40.75	0.0472	-0.97883	-1.9269	-2.95834	-3.9839	-4.97981	-5.97131	-6.95239
40.8	0.04714	-0.97874	-1.92682	-2.95848	-3.98398	-4.97961	-5.97115	-6.95301
40.85	0.04788	-0.97803	-1.92797	-2.95902	-3.98269	-4.98146	-5.97118	-6.95211
40.9	0.04586	-0.9776	-1.92798	-2.96017	-3.98264	-4.97995	-5.97079	-6.95153
40.95	0.04462	-0.97793	-1.92731	-2.96155	-3.98459	-4.98053	-5.9724	-6.9518
41	0.04395	-0.97811	-1.92937	-2.95947	-3.98462	-4.98063	-5.97112	-6.95347
41.05	0.04504	-0.97839	-1.92685	-2.95917	-3.98469	-4.98073	-5.9709	-6.95158
41.1	0.0442	-0.97844	-1.92687	-2.95947	-3.98318	-4.98076	-5.97194	-6.95258
41.15	0.04596	-0.97811	-1.92746	-2.95953	-3.9846	-4.97975	-5.97115	-6.95297
41.2	0.04501	-0.97816	-1.92802	-2.95819	-3.98343	-4.98046	-5.97069	-6.95252
41.25	0.04325	-0.97878	-1.92547	-2.96136	-3.98547	-4.98099	-5.97062	-6.95123
41.3	0.04444	-0.97788	-1.92521	-2.95998	-3.98317	-4.97958	-5.96998	-6.95083
41.35	0.04415	-0.97805	-1.92634	-2.95727	-3.98433	-4.97989	-5.96884	-6.95151
41.4	0.0466	-0.97826	-1.92626	-2.95703	-3.9846	-4.9802	-5.96988	-6.95092
41.45	0.04721	-0.97715	-1.91949	-2.95649	-3.98477	-4.97907	-5.96927	-6.9491
41.5	0.04852	-0.97661	-1.91918	-2.95572	-3.98364	-4.97961	-5.96846	-6.95032
41.55	0.04901	-0.97594	-1.91898	-2.95335	-3.98443	-4.97828	-5.96802	-6.94967
41.6	0.05263	-0.97486	-1.91326	-2.9529	-3.98384	-4.97788	-5.96858	-6.95052
41.65	0.0554	-0.97446	-1.90895	-2.95193	-3.98211	-4.97705	-5.9665	-6.94963
41.7	0.05757	-0.97253	-1.90337	-2.94925	-3.98225	-4.97559	-5.96673	-6.94922
41.75	0.06187	-0.97052	-1.89776	-2.9453	-3.98069	-4.97324	-5.96594	-6.94906
41.8	0.06863	-0.96728	-1.88882	-2.94341	-3.97972	-4.97197	-5.96451	-6.94988
41.85	0.07677	-0.96347	-1.88321	-2.94064	-3.97525	-4.96916	-5.96381	-6.94772
41.9	0.08555	-0.96051	-1.87224	-2.93821	-3.97101	-4.96636	-5.96253	-6.94642
41.95	0.09508	-0.95776	-1.86294	-2.93656	-3.96451	-4.96407	-5.96152	-6.94776
42	0.10541	-0.95426	-1.85604	-2.93271	-3.96119	-4.96035	-5.96023	-6.94722
42.05	0.11254	-0.95182	-1.84666	-2.93137	-3.95526	-4.95809	-5.95916	-6.94693
42.1	0.12044	-0.95031	-1.84515	-2.93092	-3.95583	-4.95668	-5.95831	-6.94687
42.15	0.12547	-0.95253	-1.8372	-2.92779	-3.95852	-4.95475	-5.95834	-6.9459
42.2	0.13197	-0.95355	-1.83721	-2.92593	-3.96164	-4.9539	-5.95714	-6.94333
42.25	0.13569	-0.95514	-1.83398	-2.92719	-3.96222	-4.95242	-5.95597	-6.94346
42.3	0.13717	-0.95626	-1.8363	-2.92876	-3.96392	-4.95077	-5.95564	-6.94012
42.35	0.13617	-0.95854	-1.83563	-2.92918	-3.96567	-4.94963	-5.95515	-6.93896
42.4	0.13181	-0.95992	-1.83988	-2.92876	-3.96394	-4.9514	-5.95437	-6.93753
42.45	0.12566	-0.96034	-1.84385	-2.93217	-3.96522	-4.95438	-5.95525	-6.93761
42.5	0.11911	-0.96121	-1.85238	-2.93404	-3.96553	-4.95743	-5.9549	-6.93835
42.55	0.10969	-0.9622	-1.86117	-2.93578	-3.96468	-4.95928	-5.95522	-6.93734
42.6	0.10307	-0.96403	-1.86425	-2.93585	-3.96547	-4.96107	-5.9552	-6.94038
42.65	0.09556	-0.96552	-1.86902	-2.93947	-3.96724	-4.96327	-5.95565	-6.94007
42.7	0.09435	-0.96684	-1.87506	-2.9402	-3.9699	-4.9642	-5.95563	-6.94364
42.75	0.09344	-0.96777	-1.87643	-2.94278	-3.97272	-4.96601	-5.95571	-6.94231
42.8	0.08985	-0.96945	-1.87952	-2.94436	-3.97497	-4.96826	-5.95661	-6.94358
42.85	0.0885	-0.96988	-1.88098	-2.94443	-3.97711	-4.96858	-5.95653	-6.94451
42.9	0.08714	-0.97055	-1.88023	-2.94312	-3.9789	-4.96855	-5.95761	-6.94533
42.95	0.08479	-0.97128	-1.88192	-2.94557	-3.97829	-4.96763	-5.95838	-6.94693
43	0.08302	-0.97269	-1.88017	-2.94596	-3.97939	-4.96674	-5.95878	-6.94597
43.05	0.08366	-0.97231	-1.8804	-2.94588	-3.97756	-4.96569	-5.95868	-6.9461
43.1	0.08305	-0.97299	-1.88322	-2.94722	-3.9788	-4.96435	-5.95857	-6.94886
43.15	0.08289	-0.97347	-1.88147	-2.94733	-3.97938	-4.96328	-5.95999	-6.95058
43.2	0.08437	-0.97389	-1.88314	-2.94982	-3.98032	-4.96325	-5.96122	-6.94791
43.25	0.08069	-0.97431	-1.88574	-2.94889	-3.98157	-4.96188	-5.96045	-6.94912
43.3	0.07969	-0.97372	-1.89246	-2.94844	-3.98051	-4.96307	-5.96117	-6.94842
43.35	0.07599	-0.97525	-1.89382	-2.95131	-3.98195	-4.96422	-5.96117	-6.95065
43.4	0.07415	-0.97486	-1.89557	-2.95248	-3.98069	-4.96635	-5.96142	-6.94986
43.45	0.06785	-0.97488	-1.90186	-2.95271	-3.98098	-4.96813	-5.96359	-6.95114
43.5	0.06404	-0.97613	-1.90564	-2.95369	-3.98167	-4.97031	-5.96274	-6.95034
43.55	0.06142	-0.97584	-1.90864	-2.95397	-3.97834	-4.97108	-5.96262	-6.95095
43.6	0.05863	-0.97486	-1.91426	-2.95397	-3.9784	-4.97312	-5.96419	-6.95223
43.65	0.05893	-0.97617	-1.91433	-2.95319	-3.97843	-4.97355	-5.96413	-6.95138
43.7	0.05788	-0.9757	-1.91868	-2.95578	-3.97684	-4.97475	-5.96408	-6.95329
43.75	0.05824	-0.97579	-1.91656	-2.95557	-3.97639	-4.97447	-5.96486	-6.9522
43.8	0.05855	-0.97757	-1.91845	-2.95735	-3.97722	-4.97586	-5.96533	-6.9537
43.85	0.05657	-0.97747	-1.9234	-2.95733	-3.98048	-4.97554	-5.965	-6.95249
43.9	0.05679	-0.97931	-1.92338	-2.95759	-3.98078	-4.97569	-5.96562	-6.95362
43.95	0.05516	-0.9787	-1.92168	-2.95957	-3.98432	-4.97476	-5.96623	-6.95473
44	0.05413	-0.97885	-1.9218	-2.95895	-3.98483	-4.97662	-5.96532	-6.95444
44.05	0.05139	-0.97961	-1.92522	-2.95729	-3.98553	-4.97712	-5.96674	-6.95586
44.1	0.05122	-0.97952	-1.9277	-2.9604	-3.98616	-4.97749	-5.96734	-6.95575
44.15	0.05062	-0.9792	-1.92823	-2.95802	-3.98477	-4.97749	-5.96776	-6.95579
44.2	0.04869	-0.9788	-1.92628	-2.95903	-3.98465	-4.97804	-5.96909	-6.95544
44.25	0.051	-0.97787	-1.92379	-2.95714	-3.98353	-4.97842	-5.96799	-6.95628
44.3	0.05031	-0.97702	-1.92434	-2.95797	-3.98276	-4.97802	-5.96851	-6.95609
44.35	0.05321	-0.97769	-1.92316	-2.95814	-3.982	-4.97746	-5.96831	-6.9581
44.4	0.05484	-0.97793	-1.91583	-2.95657	-3.98062	-4.97737	-5.96866	-6.95801
44.45	0.05759	-0.97752	-1.91637	-2.95663	-3.98063	-4.97643	-5.96915	-6.9576
44.5	0.05939	-0.97785	-1.91101	-2.95743	-3.98035	-4.976	-5.96954	-6.95929
44.55	0.06299	-0.97828	-1.90747	-2.95679	-3.98139	-4.97352	-5.96877	-6.95987
44.6	0.06579	-0.97922	-1.90863	-2.95758	-3.98354	-4.97184	-5.96929	-6.95972
44.65	0.06615	-0.97974	-1.90402	-2.95716	-3.98275	-4.97112	-5.96926	-6.95883
44.7	0.06551	-0.97999	-1.90726	-2.95787	-3.98534	-4.96898	-5.9706	-6.95962
44.75	0.0632	-0.98104	-1.90489	-2.95616	-3.98617	-4.96862	-5.96977	-6.9607
44.8	0.06137	-0.98035	-1.90657	-2.95744	-3.98573	-4.96932	-5.97169	-6.96015
44.85	0.05779	-0.98134	-1.90765	-2.95866	-3.98406	-4.96996	-5.97028	-6.96071
44.9	0.05682	-0.98157	-1.91621	-2.95914	-3.98538	-4.97295	-5.97161	-6.96113
44.95	0.0533	-0.98142	-1.91668	-2.96065	-3.98637	-4.97428	-5.97231	-6.96028
45	0.05155	-0.98128	-1.9179	-2.96009	-3.98429	-4.97497	-5.97137	-6.9603
45.05	0.04876	-0.98155	-1.91867	-2.96211	-3.98553	-4.97611	-5.97219	-6.96056
45.1	0.04665	-0.98157	-1.92329	-2.96203	-3.98431	-4.97724	-5.97246	-6.96146
45.15	0.04728	-0.98208	-1.92505	-2.96376	-3.98365	-4.97735	-5.97264	-6.96226
45.2	0.04358	-0.98104	-1.92622	-2.96432	-3.98403	-4.97697	-5.97256	-6.96057
45.25	0.04489	-0.98082	-1.93169	-2.96318	-3.983	-4.97747	-5.9731	-6.96174
45.3	0.04441	-0.98058	-1.93188	-2.9648	-3.98327	-4.97813	-5.97279	-6.9623
45.35	0.04368	-0.98067	-1.93455	-2.9637	-3.98252	-4.97804	-5.97422	-6.96399
45.4	0.04323	-0.98018	-1.93551	-2.96403	-3.98038	-4.97884	-5.97374	-6.96318
45.45	0.04252	-0.97957	-1.93507	-2.96396	-3.98117	-4.97995	-5.97465	-6.96381
45.5	0.04183	-0.98011	-1.94128	-2.96671	-3.98243	-4.9796	-5.9743	-6.9634
45.55	0.04193	-0.98108	-1.93814	-2.96632	-3.9806	-4.9803	-5.97405	-6.96574
45.6	0.04299	-0.98134	-1.94256	-2.96582	-3.98447	-4.98049	-5.97479	-6.96476
45.65	0.04209	-0.98183	-1.9383	-2.96635	-3.98395	-4.98044	-5.9751	-6.96402
45.7	0.04287	-0.9824	-1.94038	-2.96406	-3.98435	-4.9804	-5.97528	-6.96537
45.75	0.04325	-0.98181	-1.94041	-2.96569	-3.98562	-4.98048	-5.97525	-6.96457
45.8	0.04364	-0.98261	-1.94045	-2.96741	-3.9858	-4.97905	-5.97542	-6.96569
45.85	0.04585	-0.9827	-1.93863	-2.9669	-3.98582	-4.97888	-5.97527	-6.96551
45.9	0.04485	-0.98362	-1.93865	-2.96813	-3.98567	-4.97869	-5.97686	-6.9657
45.95	0.04582	-0.98336	-1.93789	-2.96813	-3.98761	-4.97793	-5.97593	-6.96686
46	0.0465	-0.98425	-1.93769	-2.96815	-3.98783	-4.97759	-5.97561	-6.96646
46.05	0.04506	-0.98402	-1.93616	-2.96913	-3.98846	-4.97676	-5.97609	-6.96762
46.1	0.04458	-0.98359	-1.938	-2.96763	-3.98823	-4.97781	-5.97619	-6.96708
46.15	0.04285	-0.98403	-1.93704	-2.96921	-3.98834	-4.97625	-5.97567	-6.96654
46.2	0.04252	-0.98394	-1.9375	-2.96788	-3.9876	-4.97627	-5.97662	-6.96792
46.25	0.04434	-0.98339	-1.93817	-2.9674	-3.98874	-4.97682	-5.97642	-6.96589
46.3	0.04395	-0.98346	-1.93492	-2.96809	-3.98662	-4.97744	-5.97677	-6.96782
46.35	0.04364	-0.98326	-1.93821	-2.96887	-3.98678	-4.97752	-5.97632	-6.96858
46.4	0.0463	-0.98365	-1.93686	-2.97007	-3.98605	-4.97823	-5.97694	-6.9673
46.45	0.04432	-0.98372	-1.93854	-2.96915	-3.98663	-4.97873	-5.97731	-6.9671
46.5	0.04669	-0.98395	-1.93949	-2.96787	-3.98623	-4.97849	-5.97598	-6.96801
46.55	0.04723	-0.98337	-1.93769	-2.96951	-3.98615	-4.97925	-5.9773	-6.96643
46.6	0.0457	-0.98363	-1.94023	-2.96958	-3.98638	-4.98008	-5.97634	-6.96765
46.65	0.04515	-0.98352	-1.93879	-2.97015	-3.98431	-4.979	-5.97703	-6.96773
46.7	0.04533	-0.98294	-1.93699	-2.96789	-3.98658	-4.9793	-5.97612	-6.96875
46.75	0.04525	-0.98379	-1.94129	-2.96815	-3.98846	-4.97954	-5.9772	-6.96855
46.8	0.04639	-0.98374	-1.93675	-2.97106	-3.98743	-4.97955	-5.97736	-6.96776
46.85	0.04696	-0.98298	-1.93808	-2.96954	-3.98727	-4.97982	-5.97769	-6.9686
46.9	0.0485	-0.98263	-1.93886	-2.96873	-3.98681	-4.97836	-5.97729	-6.96898
46.95	0.04909	-0.9827	-1.93862	-2.96948	-3.98609	-4.97846	-5.97806	-6.96958
47	0.05322	-0.9821	-1.938	-2.96793	-3.98497	-4.97894	-5.97743	-6.96985
47.05	0.05089	-0.98343	-1.93843	-2.97009	-3.98465	-4.97779	-5.9776	-6.97127
47.1	0.05296	-0.98286	-1.93907	-2.96836	-3.98488	-4.97795	-5.97798	-6.97084
47.15	0.05042	-0.98303	-1.94149	-2.96969	-3.98445	-4.97784	-5.97681	-6.97021
47.2	0.04845	-0.98341	-1.94205	-2.96958	-3.98379	-4.9786	-5.97841	-6.96951
47.25	0.04312	-0.98227	-1.94323	-2.96999	-3.98326	-4.97965	-5.97853	-6.97082
47.3	0.04313	-0.98247	-1.94635	-2.96967	-3.98276	-4.98017	-5.97802	-6.97029
47.35	0.04366	-0.98248	-1.95052	-2.97222	-3.98425	-4.98184	-5.97811	-6.97021
47.4	0.04236	-0.98127	-1.94899	-2.96937	-3.98105	-4.98271	-5.97803	-6.97027
47.45	0.04038	-0.98262	-1.9536	-2.97036	-3.98174	-4.98358	-5.97928	-6.97123
47.5	0.03979	-0.98174	-1.95024	-2.97108	-3.98223	-4.98369	-5.97835	-6.97082
47.55	0.04153	-0.98234	-1.95182	-2.97109	-3.98289	-4.98326	-5.97882	-6.97224
47.6	0.04143	-0.98312	-1.95356	-2.97211	-3.98361	-4.98395	-5.97854	-6.97254
47.65	0.04075	-0.9833	-1.95227	-2.97136	-3.98255	-4.98357	-5.97953	-6.97239
47.7	0.04322	-0.98326	-1.94904	-2.9716	-3.98434	-4.98361	-5.97915	-6.97038
47.75	0.04162	-0.98365	-1.95182	-2.97262	-3.98481	-4.98283	-5.98053	-6.96666
47.8	0.04186	-0.98448	-1.95055	-2.97122	-3.98442	-4.9824	-5.97904	-6.97061
47.85	0.04313	-0.98422	-1.95223	-2.97302	-3.98447	-4.98301	-5.97957	-6.97157
47.9	0.04153	-0.98446	-1.94956	-2.97207	-3.98571	-4.98324	-5.97962	-6.97186
47.95	0.04263	-0.98444	-1.94819	-2.97279	-3.98575	-4.98263	-5.98014	-6.97176
48	0.04283	-0.98443	-1.94979	-2.97394	-3.98593	-4.98318	-5.98077	-6.97363
48.05	0.0437	-0.98545	-1.95114	-2.9729	-3.98653	-4.98189	-5.97987	-6.97368
48.1	0.04412	-0.98493	-1.9516	-2.97201	-3.9866	-4.98277	-5.98002	-6.97277
48.15	0.0454	-0.98507	-1.95161	-2.97302	-3.98631	-4.98278	-5.98084	-6.97399
48.2	0.04329	-0.98544	-1.94863	-2.97269	-3.98668	-4.98203	-5.98063	-6.97378
48.25	0.04222	-0.98466	-1.95045	-2.97369	-3.98726	-4.98254	-5.98145	-6.97388
48.3	0.04172	-0.98511	-1.95089	-2.97244	-3.98662	-4.98212	-5.98092	-6.97386
48.35	0.04283	-0.98588	-1.95191	-2.97332	-3.98754	-4.98165	-5.98148	-6.97385
48.4	0.04207	-0.98533	-1.95211	-2.97329	-3.98704	-4.98109	-5.98067	-6.97442
48.45	0.04087	-0.98447	-1.9543	-2.97314	-3.98759	-4.98243	-5.98231	-6.97395
48.5	0.0411	-0.98522	-1.95212	-2.9717	-3.98703	-4.98178	-5.98223	-6.97529
48.55	0.04028	-0.98476	-1.95059	-2.97295	-3.98608	-4.98198	-5.98303	-6.97545
48.6	0.04375	-0.98493	-1.95224	-2.97348	-3.98549	-4.98172	-5.98255	-6.97494
48.65	0.0458	-0.98473	-1.95017	-2.97482	-3.98529	-4.98244	-5.98128	-6.97529
48.7	0.04651	-0.98452	-1.94873	-2.97241	-3.98655	-4.98139	-5.98334	-6.97546
48.75	0.04764	-0.98459	-1.95187	-2.97278	-3.98528	-4.98089	-5.98202	-6.9761
48.8	0.04998	-0.98516	-1.94945	-2.97423	-3.98631	-4.98141	-5.98306	-6.97578
48.85	0.04918	-0.98545	-1.94862	-2.97333	-3.98719	-4.98099	-5.98251	-6.97505
48.9	0.05008	-0.98493	-1.94848	-2.97395	-3.98854	-4.97966	-5.98307	-6.97556
48.95	0.04783	-0.98551	-1.95038	-2.97415	-3.98881	-4.98109	-5.98305	-6.97668
49	0.04801	-0.98497	-1.94947	-2.9734	-3.9886	-4.98057	-5.98343	-6.97669
49.05	0.04592	-0.98554	-1.95024	-2.97434	-3.98841	-4.98006	-5.98287	-6.9754
49.1	0.04374	-0.98564	-1.94928	-2.97497	-3.98883	-4.98031	-5.98401	-6.97791
49.15	0.04395	-0.98553	-1.95339	-2.9735	-3.98771	-4.98082	-5.98455	-6.97734
49.2	0.03952	-0.98535	-1.95401	-2.97438	-3.98638	-4.98105	-5.98457	-6.97629
49.25	0.04018	-0.9853	-1.95205	-2.97374	-3.98662	-4.98106	-5.98407	-6.97738
49.3	0.04064	-0.98629	-1.95283	-2.97549	-3.98665	-4.98104	-5.9847	-6.97783
49.35	0.04037	-0.98578	-1.95631	-2.97493	-3.98534	-4.9807	-5.9852	-6.97689
49.4	0.03947	-0.98651	-1.95399	-2.9738	-3.98496	-4.98092	-5.98459	-6.97825
49.45	0.03935	-0.98698	-1.95519	-2.97507	-3.98563	-4.9816	-5.98542	-6.97706
49.5	0.04021	-0.98672	-1.95245	-2.9746	-3.98686	-4.98236	-5.98466	-6.97839
49.55	0.04039	-0.98724	-1.95224	-2.97537	-3.98661	-4.98194	-5.98453	-6.97687
49.6	0.03913	-0.98746	-1.954	-2.97628	-3.98805	-4.98171	-5.98493	-6.97861
49.65	0.04072	-0.98835	-1.95398	-2.97597	-3.98875	-4.98135	-5.98621	-6.97804
49.7	0.04105	-0.98773	-1.95476	-2.97692	-3.98923	-4.98148	-5.98567	-6.97918
49.75	0.03853	-0.98774	-1.95703	-2.97588	-3.99051	-4.98142	-5.98547	-6.97984
49.8	0.03756	-0.98782	-1.95459	-2.97518	-3.99033	-4.98132	-5.98493	-6.97774
49.85	0.03665	-0.98947	-1.95574	-2.97628	-3.99047	-4.98181	-5.98555	-6.97835
49.9	0.03682	-0.989	-1.95473	-2.97796	-3.99165	-4.9811	-5.98611	-6.98037
49.95	0.03694	-0.98904	-1.95613	-2.97924	-3.99223	-4.98176	-5.98704	-6.97887
50	0.03551	-0.98886	-1.96102	-2.9767	-3.99178	-4.98268	-5.98711	-6.97942
50.05	0.03372	-0.99	-1.9594	-2.98024	-3.9909	-4.98256	-5.98693	-6.98007
50.1	0.03295	-0.98927	-1.96059	-2.97785	-3.99072	-4.9827	-5.98739	-6.97924
50.15	0.03354	-0.98966	-1.9609	-2.97903	-3.99145	-4.984	-5.98652	-6.9798
50.2	0.03142	-0.989	-1.96103	-2.98045	-3.99055	-4.98386	-5.98614	-6.98043
50.25	0.03225	-0.99005	-1.96429	-2.98081	-3.99104	-4.98345	-5.98651	-6.98039
50.3	0.03107	-0.98982	-1.96553	-2.97962	-3.99206	-4.98334	-5.98716	-6.98003
50.35	0.03104	-0.99053	-1.96355	-2.98023	-3.99342	-4.98347	-5.98859	-6.98142
50.4	0.03046	-0.99014	-1.96337	-2.98089	-3.99188	-4.98447	-5.98746	-6.98115
50.45	0.02862	-0.99083	-1.96425	-2.98135	-3.99247	-4.98372	-5.9886	-6.98055
50.5	0.02974	-0.99153	-1.96628	-2.98084	-3.99313	-4.98459	-5.98733	-6.98089
50.55	0.02585	-0.99178	-1.96663	-2.98052	-3.99286	-4.98412	-5.98779	-6.98085
50.6	0.02679	-0.99165	-1.96574	-2.98161	-3.9932	-4.98442	-5.98738	-6.97943
50.65	0.02382	-0.99122	-1.96602	-2.98154	-3.99353	-4.98483	-5.98896	-6.98015
50.7	0.02416	-0.99144	-1.96974	-2.98358	-3.99344	-4.985	-5.98827	-6.98021
50.75	0.02296	-0.99129	-1.9653	-2.98173	-3.99436	-4.98497	-5.98789	-6.98051
50.8	0.02282	-0.99139	-1.96952	-2.98174	-3.99262	-4.9856	-5.98793	-6.98093
50.85	0.02379	-0.99066	-1.96856	-2.98169	-3.99262	-4.98566	-5.98831	-6.98021
50.9	0.02511	-0.991	-1.96831	-2.98194	-3.99257	-4.98573	-5.98828	-6.98071
50.95	0.02491	-0.99115	-1.96471	-2.98195	-3.99213	-4.98613	-5.98733	-6.98163
51	0.02596	-0.99171	-1.96709	-2.98383	-3.99392	-4.985	-5.98861	-6.98061
51.05	0.02815	-0.99106	-1.9673	-2.98119	-3.99449	-4.98516	-5.98842	-6.98207
51.1	0.0287	-0.99108	-1.96671	-2.98309	-3.99263	-4.9841	-5.98718	-6.98059
51.15	0.03019	-0.99091	-1.96428	-2.98185	-3.993	-4.98384	-5.98644	-6.98104
51.2	0.02963	-0.99092	-1.964	-2.98062	-3.99157	-4.98482	-5.98816	-6.98165
51.25	0.02862	-0.99018	-1.96666	-2.98092	-3.99225	-4.98437	-5.98686	-6.98146
51.3	0.03154	-0.99061	-1.96586	-2.98272	-3.99006	-4.98408	-5.98736	-6.9812
51.35	0.02927	-0.98972	-1.96423	-2.98141	-3.99	-4.98388	-5.98796	-6.98148
51.4	0.02963	-0.98976	-1.96362	-2.98048	-3.99198	-4.98363	-5.98765	-6.98177
51.45	0.03118	-0.98994	-1.96561	-2.98104	-3.99214	-4.98367	-5.98807	-6.98278
51.5	0.03022	-0.9911	-1.9644	-2.98048	-3.99274	-4.98373	-5.98702	-6.98311
51.55	0.03278	-0.99074	-1.96243	-2.97763	-3.99271	-4.98448	-5.98667	-6.98142
51.6	0.03276	-0.9903	-1.96176	-2.97926	-3.99313	-4.98415	-5.98791	-6.9826
51.65	0.03545	-0.98945	-1.95952	-2.97834	-3.99263	-4.98409	-5.98816	-6.9818
51.7	0.03991	-0.98934	-1.95892	-2.97926	-3.99272	-4.98334	-5.98699	-6.98209
51.75	0.04384	-0.99023	-1.95803	-2.97869	-3.99277	-4.98174	-5.98671	-6.98184
51.8	0.05101	-0.98924	-1.95354	-2.97787	-3.99202	-4.98112	-5.98786	-6.98263
51.85	0.05354	-0.98989	-1.95228	-2.9795	-3.99156	-4.98048	-5.98685	-6.98107
51.9	0.05849	-0.9898	-1.9487	-2.97706	-3.99302	-4.9789	-5.98743	-6.98108
51.95	0.05691	-0.99005	-1.95291	-2.97814	-3.99305	-4.97799	-5.98749	-6.98212
52	0.05253	-0.99027	-1.9531	-2.97629	-3.9927	-4.97756	-5.98698	-6.98271
52.05	0.05036	-0.99111	-1.9599	-2.97808	-3.99175	-4.97654	-5.98686	-6.98313
52.1	0.04618	-0.99142	-1.95961	-2.9792	-3.992	-4.97812	-5.98789	-6.98306
52.15	0.04031	-0.9907	-1.96264	-2.97873	-3.99321	-4.98004	-5.98894	-6.98362
52.2	0.03893	-0.98987	-1.96517	-2.9773	-3.99232	-4.98183	-5.98796	-6.98256
52.25	0.03426	-0.991	-1.96721	-2.97807	-3.99146	-4.98369	-5.9876	-6.98327
52.3	0.0307	-0.99002	-1.96964	-2.97988	-3.99234	-4.98429	-5.98794	-6.98317
52.35	0.03156	-0.99029	-1.96973	-2.98111	-3.98999	-4.98591	-5.98822	-6.98397
52.4	0.02601	-0.99092	-1.97431	-2.98013	-3.99049	-4.98729	-5.98819	-6.98248
52.45	0.02738	-0.99166	-1.97468	-2.98042	-3.99205	-4.98772	-5.98776	-6.98285
52.5	0.0253	-0.99159	-1.97563	-2.981	-3.99231	-4.98845	-5.98716	-6.98283
52.55	0.02637	-0.99145	-1.97711	-2.98099	-3.9935	-4.98917	-5.9876	-6.9832
52.6	0.02666	-0.99146	-1.97602	-2.9812	-3.99392	-4.98854	-5.98943	-6.98278
52.65	0.0245	-0.9929	-1.97593	-2.98161	-3.99321	-4.9889	-5.98846	-6.98182
52.7	0.0226	-0.99119	-1.97648	-2.98313	-3.9929	-4.98846	-5.98947	-6.98278
52.75	0.02311	-0.99183	-1.9763	-2.98196	-3.9938	-4.98907	-5.98843	-6.98258
52.8	0.02218	-0.9914	-1.97773	-2.98052	-3.99339	-4.98903	-5.98961	-6.9805
52.85	0.02418	-0.99152	-1.97843	-2.98106	-3.99211	-4.988	-5.98992	-6.98125
52.9	0.02556	-0.99127	-1.97808	-2.98139	-3.9916	-4.98852	-5.98992	-6.98309
52.95	0.02456	-0.99064	-1.97585	-2.9828	-3.99099	-4.98754	-5.98885	-6.98215
53	0.02461	-0.99154	-1.97886	-2.98124	-3.99007	-4.98677	-5.98877	-6.98346
53.05	0.02858	-0.99115	-1.97437	-2.98314	-3.99065	-4.98646	-5.98865	-6.98304
53.1	0.02951	-0.99152	-1.97563	-2.98239	-3.99079	-4.98621	-5.98905	-6.9852
53.15	0.03093	-0.99087	-1.97348	-2.98201	-3.99052	-4.98628	-5.98933	-6.98383
53.2	0.03018	-0.99121	-1.97606	-2.98192	-3.99219	-4.98557	-5.98917	-6.98356
53.25	0.02901	-0.99203	-1.97364	-2.98261	-3.99193	-4.98535	-5.98986	-6.98475
53.3	0.02888	-0.99162	-1.97499	-2.98128	-3.9929	-4.98539	-5.9896	-6.98527
53.35	0.03104	-0.9917	-1.97471	-2.98283	-3.9931	-4.98405	-5.98956	-6.98434
53.4	0.03144	-0.99136	-1.97438	-2.98316	-3.99379	-4.98487	-5.98931	-6.98579
53.45	0.02988	-0.99193	-1.97471	-2.98189	-3.99398	-4.98521	-5.99051	-6.98544
53.5	0.03137	-0.99183	-1.97489	-2.98256	-3.99438	-4.98427	-5.98998	-6.9856
53.55	0.0306	-0.99174	-1.97667	-2.98185	-3.99523	-4.98446	-5.9904	-6.98498
53.6	0.02827	-0.992	-1.97659	-2.98226	-3.99434	-4.98497	-5.99065	-6.98624
53.65	0.02728	-0.99158	-1.97444	-2.98264	-3.99334	-4.98615	-5.99108	-6.98424
53.7	0.02742	-0.99189	-1.97819	-2.98314	-3.99431	-4.98641	-5.99016	-6.98521
53.75	0.02648	-0.99169	-1.97575	-2.98296	-3.99226	-4.98554	-5.99037	-6.98584
53.8	0.02743	-0.99177	-1.97673	-2.98485	-3.99354	-4.98645	-5.99034	-6.98466
53.85	0.02595	-0.99207	-1.9784	-2.98349	-3.9927	-4.98659	-5.99044	-6.98527
53.9	0.0257	-0.99254	-1.97768	-2.98391	-3.99389	-4.98655	-5.99052	-6.98605
53.95	0.02464	-0.99296	-1.97843	-2.98362	-3.99356	-4.98705	-5.98972	-6.98688
54	0.02434	-0.99275	-1.97647	-2.98463	-3.99302	-4.98731	-5.99045	-6.98541
54.05	0.02241	-0.99292	-1.97819	-2.98455	-3.99367	-4.98697	-5.99037	-6.98571
54.1	0.01911	-0.99326	-1.97774	-2.98551	-3.99475	-4.98846	-5.99037	-6.98516
54.15	0.02177	-0.99382	-1.97873	-2.98516	-3.99469	-4.9881	-5.99185	-6.9855
54.2	0.02182	-0.9932	-1.98089	-2.98473	-3.99605	-4.98745	-5.99077	-6.98544
54.25	0.02145	-0.99371	-1.97887	-2.98299	-3.99586	-4.98703	-5.99035	-6.98629
54.3	0.02208	-0.99385	-1.97989	-2.98474	-3.99438	-4.98902	-5.9912	-6.98567
54.35	0.02277	-0.99411	-1.97978	-2.98542	-3.99595	-4.99234	-5.99155	-6.98699
54.4	0.02206	-0.99391	-1.97987	-2.98569	-3.99535	-4.99462	-5.99057	-6.9862
54.45	0.02022	-0.99314	-1.97843	-2.98562	-3.99468	-4.99473	-5.99084	-6.98617
54.5	0.02274	-0.9935	-1.97741	-2.98518	-3.99468	-4.99484	-5.99132	-6.98597
54.55	0.02351	-0.99231	-1.9788	-2.98649	-3.99509	-4.9941	-5.991	-6.98648
54.6	0.02526	-0.99361	-1.97865	-2.98447	-3.99526	-4.99463	-5.99075	-6.98696
54.65	0.02558	-0.99343	-1.9772	-2.98625	-3.99481	-4.99441	-5.99102	-6.9864
54.7	0.02724	-0.99318	-1.97467	-2.98783	-3.99444	-4.99439	-5.99087	-6.98633
54.75	0.03062	-0.99386	-1.97319	-2.98774	-3.99523	-4.99455	-5.99191	-6.98638
54.8	0.03294	-0.99394	-1.97253	-2.9894	-3.99492	-4.99311	-5.991	-6.98729
54.85	0.03182	-0.99418	-1.97083	-2.98948	-3.99593	-4.99215	-5.99174	-6.9874
54.9	0.03171	-0.99387	-1.97456	-2.98828	-3.99618	-4.99208	-5.99138	-6.9871
54.95	0.02935	-0.99484	-1.97322	-2.98881	-3.99636	-4.99127	-5.99262	-6.98625
55	0.02628	-0.99473	-1.97395	-2.98935	-3.99664	-4.99078	-5.99226	-6.98703
55.05	0.02238	-0.99453	-1.97523	-2.98931	-3.99711	-4.99079	-5.99283	-6.98476
55.1	0.02237	-0.99542	-1.97682	-2.98931	-3.99711	-4.99108	-5.99331	-6.98773
55.15	0.02115	-0.9953	-1.97371	-2.99043	-3.99715	-4.99183	-5.99339	-6.99249
55.2	0.02391	-0.99554	-1.97813	-2.98857	-3.99702	-4.99283	-5.99324	-6.9949
55.25	0.02098	-0.99536	-1.9774	-2.98864	-3.99702	-4.99297	-5.9939	-6.99661
55.3	0.02031	-0.99559	-1.98092	-2.98951	-3.99679	-4.99313	-5.99323	-6.99614
55.35	0.01984	-0.99546	-1.97803	-2.988	-3.99867	-4.99439	-5.99354	-6.996
55.4	0.01944	-0.99505	-1.98275	-2.98894	-3.99749	-4.99444	-5.99398	-6.99633
55.45	0.01896	-0.99494	-1.98295	-2.99044	-3.99651	-4.99498	-5.99433	-6.99674
55.5	0.01594	-0.99516	-1.98396	-2.99108	-3.99818	-4.99566	-5.99453	-6.99682
55.55	0.01616	-0.99539	-1.98202	-2.99072	-3.9965	-4.9954	-5.99376	-6.99693
55.6	0.01549	-0.99461	-1.98299	-2.992	-3.99535	-4.99591	-5.99369	-6.99765
55.65	0.01562	-0.99539	-1.98223	-2.98964	-3.99532	-4.99557	-5.99437	-6.99733
55.7	0.01524	-0.99511	-1.98564	-2.99111	-3.99672	-4.99558	-5.99495	-6.99735
55.75	0.01562	-0.99526	-1.98824	-2.99109	-3.99528	-4.9954	-5.99426	-6.99786
55.8	0.01524	-0.99527	-1.98316	-2.99092	-3.99389	-4.99599	-5.99435	-6.99906
55.85	0.01596	-0.99488	-1.98432	-2.99169	-3.99533	-4.99702	-5.99334	-6.99813
55.9	0.01345	-0.99508	-1.98416	-2.99092	-3.99539	-4.99633	-5.99439	-6.99794
55.95	0.01468	-0.99487	-1.98658	-2.99214	-3.99709	-4.99652	-5.99463	-6.9976
56	0.01329	-0.99476	-1.98788	-2.99186	-3.99509	-4.99627	-5.99424	-6.99789
56.05	0.01487	-0.99467	-1.98756	-2.99345	-3.99622	-4.99582	-5.99476	-6.99735
56.1	0.01173	-0.99566	-1.98952	-2.99071	-3.99568	-4.99673	-5.99446	-6.99685
56.15	0.01294	-0.99547	-1.98748	-2.99304	-3.99539	-4.99622	-5.99518	-6.99765
56.2	0.01268	-0.99571	-1.9874	-2.99253	-3.99522	-4.99647	-5.99397	-6.99848
56.25	0.01298	-0.99563	-1.98916	-2.99143	-3.995	-4.99575	-5.99549	-6.99874
56.3	0.01229	-0.99536	-1.98579	-2.99268	-3.99698	-4.99625	-5.99446	-6.99771
56.35	0.01277	-0.99516	-1.9877	-2.99269	-3.99593	-4.99552	-5.99479	-6.99947
56.4	0.01344	-0.99561	-1.98634	-2.99179	-3.99471	-4.99564	-5.99491	-6.99847
56.45	0.01572	-0.99517	-1.98632	-2.99153	-3.99465	-4.99468	-5.99519	-6.99801
56.5	0.01589	-0.99516	-1.98339	-2.99203	-3.99466	-4.99438	-5.99366	-6.99837
56.55	0.01786	-0.99505	-1.98367	-2.99045	-3.99594	-4.99416	-5.99414	-6.9985
56.6	0.01728	-0.99583	-1.98253	-2.99142	-3.99583	-4.99274	-5.99502	-6.99813
56.65	0.01905	-0.9942	-1.98207	-2.99252	-3.99476	-4.99325	-5.99432	-6.99925
56.7	0.01974	-0.99466	-1.98025	-2.99102	-3.99469	-4.99279	-5.99499	-6.99786
56.75	0.02283	-0.99523	-1.98107	-2.99183	-3.99536	-4.99256	-5.99377	-6.9996
56.8	0.02335	-0.99488	-1.97681	-2.99023	-3.99549	-4.99208	-5.99444	-6.99904
56.85	0.0265	-0.99515	-1.97819	-2.99178	-3.9943	-4.99243	-5.99435	-6.99883
56.9	0.02656	-0.995	-1.97597	-2.99111	-3.99557	-4.99178	-5.99356	-6.99986
56.95	0.02894	-0.99469	-1.97502	-2.99085	-3.99697	-4.99095	-5.99285	-6.99866
57	0.0302	-0.99506	-1.97387	-2.99118	-3.99673	-4.9907	-5.99308	-6.99853
57.05	0.03353	-0.99575	-1.97377	-2.98844	-3.99687	-4.99052	-5.99293	-7.00025
57.1	0.03067	-0.99493	-1.9721	-2.98892	-3.99772	-4.99145	-5.99356	-7.00001
57.15	0.03069	-0.99486	-1.97455	-2.99011	-3.99669	-4.99159	-5.9929	-6.99933
57.2	0.03034	-0.99494	-1.97238	-2.99039	-3.99658	-4.99252	-5.99347	-6.99969
57.25	0.03257	-0.99456	-1.97455	-2.98902	-3.99779	-4.99296	-5.99347	-6.99912
57.3	0.03226	-0.99413	-1.97398	-2.99121	-3.99631	-4.99351	-5.99344	-7.00023
57.35	0.03235	-0.9947	-1.97662	-2.99092	-3.99745	-4.99375	-5.9938	-6.99955
57.4	0.03249	-0.99394	-1.976	-2.99011	-3.99593	-4.99452	-5.99332	-7.00128
57.45	0.03181	-0.99385	-1.97803	-2.99029	-3.99667	-4.99594	-5.99271	-7.00023
57.5	0.03016	-0.99351	-1.97782	-2.99054	-3.99603	-4.99525	-5.99385	-7.00006
57.55	0.02909	-0.99385	-1.9804	-2.99087	-3.99381	-4.99607	-5.99318	-7.00071
57.6	0.02879	-0.99358	-1.98128	-2.99094	-3.9935	-4.99535	-5.99316	-7.00095
57.65	0.02473	-0.99303	-1.98216	-2.991	-3.9927	-4.99604	-5.99277	-7.0001
57.7	0.02524	-0.99337	-1.9849	-2.98912	-3.99255	-4.99649	-5.99303	-7.00025
57.75	0.02113	-0.99349	-1.98461	-2.98939	-3.99422	-4.99611	-5.9933	-7.00009
57.8	0.02324	-0.99428	-1.9852	-2.98995	-3.99546	-4.99707	-5.99283	-7.00014
57.85	0.0201	-0.99405	-1.98472	-2.99321	-3.99471	-4.99671	-5.99296	-7.00167
57.9	0.01998	-0.99428	-1.98725	-2.99299	-3.99535	-4.9968	-5.99292	-6.99913
57.95	0.01811	-0.99494	-1.986	-2.99202	-3.99614	-4.99756	-5.99398	-7.00131
58	0.01761	-0.99476	-1.98828	-2.99289	-3.99619	-4.99702	-5.99289	-7.00061
58.05	0.01552	-0.99527	-1.98867	-2.99566	-3.99606	-4.99751	-5.99346	-7.00185
58.1	0.01475	-0.99599	-1.99025	-2.99366	-3.9977	-4.99705	-5.99394	-7.00286
58.15	0.01358	-0.99601	-1.98899	-2.99355	-3.99736	-4.99765	-5.99344	-7.00181
58.2	0.01231	-0.99622	-1.99095	-2.99457	-3.99669	-4.99674	-5.99358	-7.00078
58.25	0.01203	-0.99586	-1.99207	-2.9947	-3.99824	-4.99722	-5.99382	-7.00232
58.3	0.01162	-0.99677	-1.99136	-2.99445	-3.99963	-4.99802	-5.99354	-7.00194
58.35	0.01171	-0.99681	-1.99197	-2.9964	-3.99846	-4.99798	-5.99378	-7.00176
58.4	0.00925	-0.99618	-1.99538	-2.99545	-3.99942	-4.99838	-5.9943	-7.00201
58.45	0.00893	-0.99706	-1.99209	-2.99602	-3.99857	-4.99775	-5.9943	-7.00284
58.5	0.00687	-0.99729	-1.99381	-2.99509	-3.99961	-4.99791	-5.99375	-7.00171
58.55	0.00821	-0.99779	-1.99356	-2.99564	-3.99715	-4.99803	-5.99456	-7.00164
58.6	0.00535	-0.99764	-1.99209	-2.99543	-3.99922	-4.99826	-5.99622	-7.00133
58.65	0.00706	-0.99694	-1.99577	-2.99589	-3.99916	-4.9984	-5.99476	-7.00205
58.7	0.00739	-0.99776	-1.99509	-2.99579	-3.99838	-4.9984	-5.9954	-7.00143
58.75	0.00753	-0.99802	-1.99364	-2.99678	-3.99907	-4.99858	-5.99535	-7.00199
58.8	0.00738	-0.99793	-1.996	-2.99652	-3.99989	-4.99832	-5.99588	-7.00131
58.85	0.00681	-0.99821	-1.99405	-2.99648	-3.99867	-4.99843	-5.99699	-7.00393
58.9	0.00957	-0.99759	-1.99725	-2.99692	-3.99825	-4.9979	-5.99648	-7.0031
58.95	0.00841	-0.99814	-1.99551	-2.99576	-3.99868	-4.99817	-5.9955	-7.00551
59	0.00717	-0.99826	-1.99763	-2.99777	-3.9985	-4.99851	-5.99724	-7.00283
59.05	0.00808	-0.99785	-1.99658	-2.9972	-3.99838	-4.99841	-5.99745	-7.00273
59.1	0.0074	-0.99771	-1.99535	-2.99655	-3.9987	-4.99857	-5.99662	-7.00365
59.15	0.00717	-0.99743	-1.9974	-2.99813	-3.99764	-5	-5.9964	-7.00203
59.2	0.00893	-0.99806	-1.99777	-2.99662	-3.99942	-4.99927	-5.99738	-7.00266
59.25	0.00841	-0.99787	-1.99928	-2.99857	-3.99934	-4.99928	-5.99684	-7.00265
59.3	0.00942	-0.99801	-1.99768	-2.998	-3.99903	-4.99891	-5.99768	-7.00161
59.35	0.01026	-0.99845	-1.99795	-2.99785	-3.99779	-4.99887	-5.99811	-7.00262
59.4	0.0084	-0.99891	-1.99774	-2.99498	-4.00022	-4.99779	-5.99787	-7.00193
59.45	0.0052	-0.99891	-1.99953	-2.99852	-3.9991	-4.99847	-5.99792	-7.00055
59.5	0.00618	-0.99949	-1.99885	-2.99793	-4	-4.99725	-5.99783	-7.00079
59.55	0.00517	-0.99889	-1.99877	-2.99728	-3.99934	-4.99754	-5.99829	-7.001
59.6	0.00337	-0.99905	-2	-2.99753	-3.99943	-4.9964	-5.99948	-7.00133
59.65	0.00355	-0.99967	-1.99785	-2.99896	-4.00082	-4.99636	-5.99872	-7.00058
59.7	0.00165	-0.99878	-1.99885	-2.99688	-4.0008	-4.99589	-5.99908	-7.00069
59.75	0.00149	-0.99915	-1.99827	-2.99656	-3.99956	-4.99644	-5.9991	-7.00103
59.8	0.000366533	-0.99904	-1.99947	-2.99809	-3.99963	-4.99554	-6.00053	-7.00116
59.85	0.00113	-0.99919	-1.99838	-2.99879	-4.00022	-4.99536	-5.99958	-6.99972
59.9	0.000281948	-1	-1.99976	-2.99821	-4.00066	-4.99553	-5.99936	-7.00051
59.95	0	-0.99906	-1.99879	-3	-3.99982	-4.9956	-5.99909	-7.00059
60	0.00076126	-0.99882	-1.9991	-2.99765	-4	-4.99531	-6	-7

## Sheet: Figure 3a
	CuHHTP-CN	CuHHTP-F	CuHHTP-Cl	CuHHTP-Br	CuHHTP	CuHHTP-Me	CuHHTP-NH	CuHHTP-NHBu	Cu	CuO	Cu2O
8776.57	0.00322906	0.00346721	0.00295381	0.00322843	0.00280758	0.00343097	0.00346263	0.00314806	0.00186793	0.00303274	0.00248581
8776.84	0.00317939	0.00346347	0.0029497	0.00320422	0.00288439	0.00346607	0.00325357	0.00329864	0.00187043	0.00299292	0.00251102
8777.12	0.00327623	0.00342513	0.00294477	0.00327766	0.00282732	0.00325254	0.00337001	0.00312437	0.001873	0.00295191	0.00250087
8777.4	0.00322285	0.0034178	0.00296572	0.00335058	0.00289605	0.00337156	0.00342212	0.00319489	0.00186414	0.00291194	0.00250479
8777.67	0.00324162	0.00347027	0.0030081	0.00328147	0.00288743	0.00331997	0.00333296	0.00312227	0.00183864	0.00291542	0.00247301
8777.95	0.00321455	0.00333736	0.00305875	0.00338877	0.00284878	0.00341243	0.00334508	0.00314835	0.00188165	0.00293995	0.00245217
8778.22	0.00312851	0.00335505	0.00290592	0.00326207	0.00279361	0.00328611	0.00316934	0.00314559	0.00186432	0.0029199	0.0024723
8778.5	0.00322	0.00338728	0.00303517	0.00337231	0.00281666	0.00338046	0.00337175	0.00316475	0.00183413	0.00295233	0.00249081
8778.79	0.00318126	0.00342788	0.00293858	0.00321294	0.00284094	0.00326764	0.00333276	0.0031563	0.00178423	0.00288993	0.00243645
8779.08	0.00332067	0.00329513	0.00301535	0.00322194	0.00276899	0.00327714	0.00330292	0.00319638	0.00179062	0.00290837	0.00235628
8779.36	0.00315121	0.00339315	0.00294063	0.00326292	0.0027779	0.00327109	0.00325633	0.00314965	0.00182095	0.00292043	0.00242706
8779.64	0.00316829	0.00335305	0.00304141	0.00332254	0.00275832	0.00317933	0.00336877	0.00298344	0.00179657	0.0028791	0.00239775
8779.9	0.0032306	0.00337539	0.00289209	0.00321299	0.00282527	0.00324026	0.00317759	0.00313134	0.00178878	0.00280488	0.00243078
8780.16	0.00320703	0.00326454	0.00293683	0.00308523	0.0027269	0.00311186	0.00326148	0.00301724	0.00177888	0.00279414	0.0023557
8780.43	0.00314575	0.00333127	0.00301775	0.00315657	0.0027399	0.00328277	0.00324215	0.00310962	0.00179617	0.00279737	0.00242486
8780.7	0.00309051	0.00338326	0.00279322	0.00309761	0.00273744	0.00307628	0.00311453	0.00308276	0.00172893	0.00279121	0.00236429
8780.98	0.00320136	0.0033083	0.00298634	0.00307575	0.00274492	0.00315596	0.0032788	0.00310379	0.00177112	0.00277279	0.00237228
8781.25	0.00305153	0.00336242	0.00284004	0.0030761	0.0027461	0.00314954	0.00308946	0.00310712	0.00176469	0.00277155	0.0023113
8781.53	0.00305698	0.00316961	0.00292121	0.0031814	0.0027085	0.00328403	0.00319671	0.00305415	0.00177424	0.0028048	0.00232787
8781.8	0.00305906	0.00324632	0.00289884	0.00310494	0.00271854	0.00321124	0.0032011	0.00304708	0.00176083	0.00276336	0.00233648
8782.07	0.00310677	0.00307091	0.00288036	0.00305702	0.0026152	0.00314011	0.00312929	0.00296648	0.00174432	0.00276421	0.00228488
8782.34	0.00303738	0.00311923	0.00284237	0.00299087	0.00273182	0.00314692	0.00306704	0.00306525	0.00170903	0.00274209	0.00227943
8782.62	0.0030474	0.00311254	0.00290692	0.00302807	0.00268472	0.00305137	0.00302382	0.0029318	0.00171072	0.00273028	0.00225535
8782.9	0.00301448	0.0030816	0.00288371	0.00311001	0.00264639	0.00299821	0.00306956	0.00306078	0.00172218	0.00271459	0.0023083
8783.17	0.00291576	0.00310746	0.00285766	0.00305087	0.00268255	0.00297622	0.00313071	0.00294264	0.00168686	0.00268886	0.00219693
8783.45	0.00296265	0.00303016	0.00282161	0.00303528	0.00272841	0.00318576	0.00314656	0.00292772	0.00170379	0.00267779	0.00226965
8783.72	0.00291652	0.00315016	0.0027771	0.0030086	0.00263994	0.00288611	0.00290488	0.00290024	0.00170034	0.00261053	0.00222209
8784	0.00300025	0.00297218	0.00286882	0.00297752	0.00260745	0.00296119	0.00310523	0.00291564	0.00165575	0.00263229	0.0022255
8784.28	0.00295054	0.00317102	0.00276806	0.0030037	0.00263853	0.00291277	0.00311861	0.00292915	0.00166341	0.00259918	0.00221318
8784.55	0.00300942	0.00311971	0.00277119	0.00307667	0.00258272	0.00300711	0.00305713	0.00298794	0.0016772	0.00262943	0.00223395
8784.83	0.00281288	0.00308381	0.00271185	0.00298573	0.00260914	0.00297735	0.00300823	0.00308058	0.00165847	0.00260464	0.00224078
8785.11	0.0030253	0.00301816	0.00283691	0.00291046	0.00255785	0.00285278	0.00294921	0.00294634	0.00163431	0.00264672	0.00221432
8785.4	0.00288927	0.00303888	0.00285863	0.00296137	0.0025835	0.00292167	0.00300177	0.00295279	0.0016479	0.00260695	0.00225931
8785.68	0.00289875	0.00298337	0.00279775	0.00289991	0.00255338	0.00288004	0.00290516	0.00284724	0.00162868	0.00258915	0.00223166
8785.98	0.00285267	0.00289693	0.00282677	0.00289964	0.00256286	0.00297182	0.00296352	0.00290399	0.00165069	0.0026253	0.0021788
8786.25	0.00281805	0.00295008	0.00272422	0.00289929	0.0025951	0.00282613	0.00288598	0.00277886	0.0016365	0.0025886	0.00219503
8786.51	0.00285319	0.00284153	0.002768	0.00297907	0.00254402	0.00292968	0.00283046	0.00298077	0.00165662	0.00258705	0.0021858
8786.78	0.0027563	0.00298885	0.00270498	0.002945	0.00249659	0.00286553	0.00270577	0.00284041	0.00158967	0.00257126	0.00218797
8787.05	0.00293115	0.00277205	0.00277313	0.00290626	0.00247252	0.00285535	0.00274968	0.00278832	0.00162729	0.00254632	0.00217306
8787.32	0.00274188	0.00290805	0.00260334	0.00289067	0.00250449	0.00278775	0.00275551	0.00283307	0.00159066	0.00252469	0.00208203
8787.61	0.00288589	0.00275699	0.00266438	0.00287764	0.00244863	0.00281932	0.00276225	0.00280065	0.00156842	0.00254006	0.00211286
8787.89	0.00282866	0.00284125	0.00265435	0.00278352	0.00243218	0.00284753	0.00290614	0.00276389	0.001567	0.0025294	0.00206294
8788.17	0.00282029	0.00286726	0.00259287	0.00278221	0.00249131	0.00278838	0.00278723	0.00273121	0.0015463	0.00252114	0.00204781
8788.44	0.00288855	0.00285493	0.00264946	0.00284061	0.00250611	0.00284167	0.00286427	0.00275628	0.00157394	0.00250254	0.00212875
8788.71	0.00278894	0.00283476	0.00260167	0.00276631	0.00243195	0.00275352	0.00269585	0.00265887	0.00156121	0.00247303	0.00205505
8788.97	0.00280327	0.00274864	0.00265217	0.00286863	0.00242791	0.00291421	0.00283783	0.00273056	0.00158626	0.00243419	0.00206608
8789.25	0.0027912	0.00284558	0.00255146	0.00274206	0.00244016	0.00280342	0.0027445	0.00272761	0.00153534	0.00240807	0.00206107
8789.52	0.00280514	0.00273914	0.00262423	0.00279584	0.00234844	0.00282055	0.00276818	0.00267491	0.00156943	0.00247496	0.00201833
8789.81	0.00271273	0.00282758	0.0025446	0.00276981	0.00238085	0.00278036	0.00281757	0.00267517	0.00148324	0.00246653	0.00208683
8790.1	0.00277976	0.00272021	0.00264276	0.00279549	0.00242433	0.0027408	0.002726	0.00271637	0.00151294	0.00244688	0.0020365
8790.38	0.00266593	0.00270919	0.00255076	0.00277249	0.00244649	0.00280319	0.00264987	0.00274841	0.00151602	0.00239326	0.00203957
8790.65	0.00267254	0.00272476	0.00255523	0.00273042	0.00234153	0.00275973	0.00261289	0.00263188	0.0014995	0.00241853	0.00203835
8790.93	0.00267771	0.00276733	0.0026215	0.0026674	0.00232287	0.00282142	0.00275332	0.00265918	0.0015338	0.00243357	0.00202523
8791.19	0.00264161	0.00277077	0.00253516	0.0026321	0.00232164	0.0026589	0.00264602	0.00266989	0.00153915	0.00237341	0.00194511
8791.46	0.00265061	0.00267382	0.00255676	0.00274862	0.00232101	0.00269765	0.00256105	0.00267466	0.00151821	0.00238125	0.00194376
8791.74	0.00260221	0.00279765	0.00245343	0.00266521	0.00233389	0.00253302	0.00253266	0.00266432	0.00147832	0.0023189	0.00192324
8792.02	0.00266029	0.00262565	0.00260872	0.00272895	0.00226937	0.00268764	0.00262514	0.0025323	0.00150393	0.00230699	0.00194905
8792.32	0.00256377	0.00270275	0.0024948	0.00256345	0.00228189	0.00264928	0.0024954	0.00256246	0.00148861	0.00235571	0.00194899
8792.6	0.00258662	0.00254736	0.00255781	0.00263481	0.00224405	0.00267088	0.00254074	0.00257599	0.00148341	0.00239179	0.00193408
8792.88	0.00252973	0.00259531	0.00240308	0.00264553	0.00225487	0.00274314	0.00258058	0.00268131	0.00146386	0.00233036	0.00191098
8793.15	0.00261629	0.00257515	0.00243078	0.00261039	0.00222414	0.00258638	0.00257479	0.00256545	0.00145682	0.00224689	0.00192929
8793.42	0.00251853	0.00258811	0.00238648	0.00257483	0.00228356	0.00261213	0.00252469	0.00252175	0.00144055	0.0022603	0.0019062
8793.68	0.00252275	0.00261585	0.00234459	0.00253883	0.00224545	0.00254719	0.00251804	0.00241433	0.00141576	0.00233908	0.00180331
8793.96	0.00247014	0.00261874	0.0023349	0.00253757	0.002227	0.00268908	0.00250719	0.00248742	0.00139206	0.00231612	0.00192992
8794.25	0.0024314	0.00273845	0.00237892	0.00242935	0.00223342	0.002533	0.00250848	0.00246173	0.00138988	0.00221716	0.00187653
8794.53	0.00263501	0.00262085	0.00238415	0.00251706	0.00225086	0.00265438	0.00257511	0.00252296	0.0014377	0.00228586	0.00184876
8794.82	0.00248169	0.00258567	0.00231393	0.00243274	0.00223713	0.0026128	0.00255354	0.0024775	0.00138726	0.00225704	0.00178993
8795.09	0.00257443	0.00253305	0.00227881	0.00244371	0.00216302	0.00260051	0.00253204	0.00245402	0.00139778	0.00219248	0.00183966
8795.36	0.00243172	0.00264156	0.00226851	0.00248754	0.00217041	0.00253884	0.00242059	0.00245342	0.00135377	0.00220321	0.0018059
8795.63	0.0025186	0.0025367	0.00232678	0.00247171	0.00215608	0.00256144	0.00239014	0.00245979	0.00137018	0.00220209	0.00178864
8795.91	0.00237985	0.00258898	0.00226705	0.00251024	0.00214304	0.00257902	0.00233198	0.00252256	0.0013924	0.00214043	0.0018429
8796.18	0.00245791	0.00257584	0.00224194	0.00245904	0.00214444	0.00253764	0.00246977	0.00239616	0.00136655	0.00213817	0.00175824
8796.46	0.00231403	0.00247926	0.00224442	0.00250877	0.00210081	0.0025117	0.00248952	0.00242798	0.00136395	0.0021205	0.0018513
8796.75	0.0023883	0.00253608	0.00217709	0.00237321	0.00207473	0.00245303	0.00239201	0.00236812	0.00135639	0.00209228	0.00184769
8797.03	0.00243988	0.00244375	0.00221356	0.00240926	0.00209108	0.00250152	0.00238261	0.00242491	0.00140694	0.00214858	0.00176144
8797.32	0.00233852	0.00262794	0.00213643	0.00236436	0.00209217	0.00241434	0.00234152	0.00230621	0.00133966	0.00216708	0.00174177
8797.59	0.00237395	0.00242814	0.00220156	0.0024308	0.00211064	0.0024994	0.00241598	0.00236011	0.00138095	0.00216448	0.00173422
8797.85	0.00225793	0.00252523	0.00207725	0.00233684	0.00213919	0.00238937	0.00221056	0.00242216	0.00134721	0.00206545	0.00176074
8798.13	0.00243502	0.00241807	0.00219987	0.00232177	0.00209121	0.00251214	0.00225611	0.00236539	0.00133645	0.00204107	0.00176676
8798.4	0.00231183	0.00247155	0.00208141	0.00223286	0.00208896	0.00251337	0.00229785	0.00243472	0.00129654	0.0020633	0.00174628
8798.69	0.00225163	0.00231701	0.00212128	0.00227102	0.00203513	0.00245441	0.00211357	0.00230339	0.00130076	0.00210219	0.00170667
8798.97	0.00229057	0.00241602	0.00208443	0.00230652	0.00204686	0.00243097	0.00226997	0.00238036	0.00130151	0.00210149	0.00172316
8799.26	0.00233215	0.00239282	0.0020509	0.00230842	0.00204629	0.00228197	0.00228418	0.00226207	0.00127227	0.00205639	0.00166439
8799.53	0.00234848	0.00240491	0.00212353	0.00225567	0.00203324	0.0024124	0.0022643	0.00230177	0.00129659	0.00205793	0.00167379
8799.81	0.00222622	0.00240073	0.00211828	0.00223938	0.00200592	0.00229427	0.00228177	0.00219581	0.00124143	0.00200679	0.00164578
8800.07	0.00232327	0.00227718	0.00216282	0.00223746	0.00200591	0.00237009	0.00220137	0.00226701	0.00130088	0.00196298	0.00162615
8800.35	0.00216854	0.00247137	0.00202284	0.00215073	0.00195849	0.00221997	0.00221516	0.00224049	0.00125479	0.00194788	0.00163861
8800.63	0.00228661	0.00224856	0.00209529	0.00220516	0.00200458	0.00229548	0.00221392	0.00216964	0.00131686	0.00196701	0.001614
8800.91	0.00222823	0.0023536	0.00211421	0.00223243	0.00194494	0.00225573	0.0021415	0.00219307	0.0012957	0.00195109	0.00168993
8801.19	0.00224121	0.00225708	0.00205041	0.00225222	0.00195989	0.00222281	0.00218353	0.00219573	0.00128639	0.00197084	0.00167419
8801.47	0.00215976	0.0023397	0.00202726	0.00213884	0.00204646	0.0023397	0.00217444	0.0022663	0.00122543	0.00195725	0.00163412
8801.75	0.00227714	0.00222984	0.00203854	0.00210722	0.00196822	0.00215959	0.00214403	0.0022159	0.00123383	0.0019653	0.00159859
8802.01	0.00223086	0.00220914	0.00206996	0.00215634	0.00200094	0.00229914	0.00222904	0.00215512	0.00125274	0.00193808	0.0016346
8802.27	0.00209544	0.00221567	0.00194663	0.0021165	0.00195719	0.00222756	0.00212264	0.00199636	0.0011897	0.00188733	0.0016053
8802.55	0.00215261	0.0022592	0.00200521	0.00210227	0.00192466	0.00226341	0.00214205	0.00212348	0.00120787	0.00187694	0.00160618
8802.84	0.00206546	0.00226203	0.00194559	0.00213607	0.00194891	0.00204985	0.00211699	0.00208086	0.00120742	0.0018523	0.00159894
8803.12	0.00217934	0.00222776	0.00209609	0.00216051	0.00189646	0.00227335	0.0021116	0.00210913	0.00120843	0.0018869	0.00159258
8803.41	0.00210196	0.00233295	0.00196789	0.0020193	0.00187415	0.00215917	0.00206565	0.00208296	0.0011939	0.00188901	0.0015977
8803.69	0.00214466	0.00212254	0.00205241	0.0020016	0.00184286	0.0022355	0.00203228	0.00212231	0.00117673	0.00190174	0.0015874
8803.97	0.00206505	0.00219439	0.00194299	0.00209537	0.00188306	0.00211794	0.00201778	0.0021439	0.00117664	0.00186492	0.00157778
8804.24	0.00215634	0.00212385	0.00190935	0.0020799	0.00188005	0.00206564	0.00209697	0.00199859	0.00119173	0.0018725	0.00151752
8804.51	0.00205569	0.00217449	0.0019505	0.00202021	0.0018591	0.00206579	0.00204887	0.00200439	0.00118041	0.00185385	0.00156321
8804.78	0.00212928	0.00215093	0.00190004	0.00202842	0.00185185	0.00201651	0.00196761	0.00202351	0.00114325	0.00182055	0.0015554
8805.06	0.00211519	0.00211085	0.00197008	0.00212383	0.00183793	0.00212295	0.00209587	0.00205044	0.00120772	0.00182278	0.00156579
8805.34	0.00197137	0.00214139	0.00183429	0.00196423	0.00184149	0.00205023	0.00199863	0.00192941	0.00117969	0.00178063	0.00148747
8805.64	0.00208977	0.00203406	0.00198599	0.00202126	0.0018117	0.00214089	0.00200931	0.00202297	0.00113853	0.00180272	0.00151213
8805.93	0.0019634	0.00212977	0.00181999	0.00194498	0.001852	0.00206304	0.00203516	0.00204362	0.00114166	0.00177773	0.00147457
8806.2	0.00202258	0.00194963	0.00187256	0.00200993	0.00182173	0.00202807	0.00195851	0.0020301	0.00113585	0.00183149	0.00153141
8806.48	0.00203101	0.00210364	0.00186451	0.00198868	0.00182729	0.00204443	0.00199594	0.00206936	0.00113111	0.00177682	0.00148328
8806.75	0.00205062	0.00200768	0.00192654	0.00195298	0.00174945	0.00193763	0.00201685	0.00202721	0.00112005	0.00172549	0.00144151
8807.02	0.00197777	0.00195164	0.0018291	0.00194829	0.00181883	0.00204929	0.00203362	0.00199609	0.00113054	0.00173617	0.00149712
8807.29	0.0018652	0.001987	0.00180789	0.0019291	0.00169816	0.00199079	0.00194328	0.0020235	0.00111278	0.00174396	0.00142473
8807.58	0.00196804	0.00191242	0.00189326	0.00190438	0.00174448	0.0020302	0.00191815	0.00194555	0.00113051	0.00174106	0.0014396
8807.86	0.0019526	0.00197209	0.00177748	0.00182281	0.00174144	0.00185191	0.00191619	0.00191854	0.0010881	0.00170804	0.00140063
8808.13	0.00202092	0.0018959	0.00194588	0.00188565	0.00168706	0.00192929	0.00200601	0.00199011	0.00109557	0.00169271	0.00141747
8808.41	0.0018788	0.00199344	0.00178706	0.00189118	0.00174658	0.00187905	0.00198425	0.00191683	0.0010579	0.00167591	0.00143349
8808.67	0.00183883	0.00195467	0.00186136	0.00191968	0.00173211	0.00195973	0.00184995	0.00193291	0.00108364	0.0016639	0.00142173
8808.94	0.00180392	0.00203376	0.00173291	0.00192061	0.00175219	0.00189063	0.00182796	0.00198624	0.00105614	0.00165054	0.00139596
8809.22	0.00196341	0.00191909	0.0018412	0.00187258	0.00168627	0.00188132	0.00185199	0.0018118	0.00106102	0.00172519	0.0013649
8809.49	0.0017843	0.00196829	0.00179974	0.00178262	0.00166927	0.00179283	0.00186935	0.00179186	0.00106717	0.00168864	0.0014084
8809.78	0.00189626	0.00189067	0.00167963	0.00173934	0.00161338	0.00186117	0.00180737	0.00179787	0.00105797	0.00166362	0.00136681
8810.06	0.00180662	0.00191385	0.00181913	0.00184067	0.00160665	0.00189719	0.00183268	0.00190622	0.00108181	0.00167849	0.00138113
8810.35	0.00178239	0.00196674	0.00174666	0.00182959	0.00160508	0.00180877	0.00184484	0.00182688	0.00105938	0.00168067	0.00131
8810.63	0.00180537	0.00187826	0.00181584	0.00182702	0.00168576	0.0018977	0.00186801	0.00186604	0.00104033	0.00169844	0.00137738
8810.9	0.00181152	0.00197009	0.00170658	0.00178191	0.00164106	0.00177208	0.00173761	0.00177951	0.00104252	0.00167241	0.00132814
8811.17	0.00187816	0.00178831	0.00174187	0.00182095	0.00158949	0.00180752	0.00180939	0.00187328	0.00103457	0.00168457	0.00136101
8811.44	0.00176639	0.00189189	0.00166169	0.0017785	0.00165003	0.00175033	0.00176834	0.00188786	0.0010362	0.00160917	0.0013479
8811.72	0.00185196	0.0017639	0.00168575	0.00183672	0.00155549	0.00182095	0.00180901	0.00180199	0.00101857	0.00158796	0.00132128
8812.01	0.00177223	0.00193163	0.0016429	0.00173834	0.00157619	0.0017699	0.00180068	0.00183325	0.000976483	0.00153842	0.00135023
8812.3	0.00183015	0.00185585	0.00163069	0.00172793	0.00156393	0.00169672	0.00179964	0.00175316	0.000981952	0.00152221	0.00127284
8812.59	0.00172554	0.00186627	0.00160006	0.00171759	0.00153276	0.00183435	0.00183377	0.00180247	0.000995554	0.00154468	0.00126373
8812.87	0.00175052	0.00185337	0.00161218	0.00167729	0.0015111	0.00172757	0.00180474	0.00172078	0.000973594	0.00154135	0.00125504
8813.14	0.00171591	0.00175944	0.00163286	0.00169576	0.00157219	0.00174902	0.0017887	0.00168231	0.000991335	0.00155971	0.00132524
8813.4	0.00169363	0.00199722	0.00153208	0.00166156	0.00152867	0.00167734	0.00175303	0.0016634	0.000971022	0.00153987	0.00126261
8813.68	0.00174419	0.00174363	0.00171888	0.00181615	0.00149339	0.00177131	0.00180243	0.00168792	0.000958641	0.00155364	0.00128453
8813.96	0.00159084	0.00190832	0.00158059	0.00167538	0.0014993	0.00168051	0.00174545	0.00169616	0.000939478	0.00151557	0.00124579
8814.25	0.00174452	0.00177047	0.00158332	0.00172518	0.00153089	0.00173199	0.00179154	0.00176252	0.000935728	0.0014673	0.00119528
8814.53	0.00162703	0.00195052	0.00150084	0.00168464	0.00149135	0.0017	0.00161868	0.00175899	0.000914243	0.00145612	0.00124928
8814.81	0.00158277	0.00174392	0.00157363	0.00156592	0.00146649	0.00169102	0.00169809	0.00167285	0.000934444	0.00145784	0.00127143
8815.08	0.00153061	0.00178934	0.00150605	0.00164651	0.00149878	0.00170695	0.00157939	0.00173278	0.000932422	0.00140994	0.00122882
8815.35	0.00169103	0.00172421	0.00153481	0.0016903	0.00142339	0.00164299	0.0016712	0.00155056	0.000925	0.00141907	0.00116897
8815.62	0.00155598	0.0017901	0.00158938	0.00168055	0.00141447	0.00171905	0.00156775	0.00175194	0.000887308	0.00144971	0.00124912
8815.9	0.00164027	0.00187739	0.00139783	0.00156647	0.00142448	0.00154549	0.00155042	0.0016763	0.000855076	0.00140149	0.00118217
8816.18	0.00166401	0.00173726	0.00157024	0.00158825	0.00139425	0.00165685	0.00168812	0.00164715	0.000890406	0.00144064	0.00117143
8816.47	0.00157474	0.00186978	0.00133022	0.00143545	0.00144252	0.00166111	0.00160872	0.00159961	0.000845836	0.00147783	0.00113271
8816.75	0.00161871	0.00161783	0.0014682	0.00154762	0.00142871	0.00159033	0.00168246	0.00163895	0.000835302	0.00144866	0.00111557
8817.03	0.00151448	0.00182909	0.00142387	0.00156507	0.00140484	0.00158648	0.00166112	0.00159937	0.00086406	0.00135636	0.0011521
8817.32	0.00157044	0.00173243	0.00143694	0.00154452	0.0013329	0.00161855	0.00161225	0.00150977	0.000874691	0.00134125	0.00118219
8817.59	0.00147567	0.00179622	0.0013638	0.00152833	0.00138351	0.00161387	0.00152744	0.00162898	0.000870869	0.00131215	0.00116179
8817.86	0.00150642	0.00181475	0.00136697	0.00160152	0.00131916	0.00158836	0.00151491	0.00152033	0.000829619	0.00132582	0.00111632
8818.14	0.00151421	0.00169212	0.00136032	0.00157	0.00137399	0.00175898	0.00160507	0.0015017	0.000816188	0.00134647	0.00110845
8818.41	0.00145486	0.00177508	0.0012121	0.00153592	0.00133447	0.00153225	0.00143152	0.00142339	0.000828377	0.00128689	0.00110402
8818.7	0.00152123	0.00161948	0.00132346	0.00152664	0.00124608	0.00165262	0.0014806	0.00152403	0.000828581	0.00132805	0.00107301
8818.98	0.0015327	0.00173254	0.00126483	0.00142862	0.00130965	0.00151622	0.00147691	0.00147512	0.000825079	0.00135625	0.00111901
8819.27	0.00155383	0.00152464	0.00141928	0.00151775	0.00130192	0.00164695	0.00149139	0.00148156	0.000830351	0.00137882	0.00106442
8819.55	0.0014207	0.00167578	0.00130778	0.00143926	0.00129981	0.0014448	0.00144005	0.00152082	0.000805348	0.00135117	0.00105906
8819.82	0.00153197	0.00154686	0.00138931	0.00144284	0.00130929	0.0016311	0.00144337	0.00150103	0.000801461	0.001332	0.00110932
8820.09	0.00141954	0.0016159	0.00127511	0.00137203	0.00135789	0.00157254	0.00142065	0.00145888	0.000787781	0.00126465	0.00107366
8820.35	0.00143779	0.00158059	0.00133558	0.00134288	0.00130213	0.00145526	0.0013691	0.00128118	0.000812962	0.00125976	0.00104061
8820.64	0.00142577	0.00166828	0.00125755	0.00137027	0.00126304	0.00146081	0.00138561	0.00139193	0.000796393	0.00128854	0.00102149
8820.92	0.00143326	0.00160237	0.00123517	0.00135584	0.00123584	0.00152261	0.00128996	0.00140448	0.000773646	0.00130301	0.000984283
8821.21	0.00136807	0.00150148	0.00129693	0.00142985	0.00127449	0.00158858	0.00140391	0.00147461	0.000774834	0.00130491	0.000997207
8821.49	0.00132746	0.00164126	0.0012227	0.00134124	0.00123725	0.00139574	0.00148289	0.00132311	0.000752098	0.00128058	0.00099318
8821.77	0.00138175	0.00151379	0.00128006	0.00144986	0.00116676	0.00163569	0.00150323	0.00134428	0.000746015	0.00127503	0.00100083
8822.04	0.00132033	0.00162261	0.00113418	0.00128411	0.00119439	0.0014306	0.00139185	0.00120374	0.000716739	0.0012599	0.000986657
8822.32	0.00139457	0.00158199	0.00121853	0.00136041	0.00118443	0.00155516	0.00133712	0.00119358	0.000718188	0.00126372	0.00096245
8822.59	0.00128287	0.00169632	0.00116114	0.0013015	0.00120674	0.00150959	0.00132853	0.00133804	0.000705542	0.00119219	0.000963892
8822.87	0.00134823	0.00153666	0.00122113	0.00130699	0.00114098	0.00137289	0.00130526	0.00122608	0.000737733	0.00117751	0.000979426
8823.16	0.00119409	0.00156955	0.00111382	0.00131121	0.00121763	0.00140436	0.00136336	0.00132084	0.000735393	0.00118753	0.000972198
8823.44	0.00127548	0.00150884	0.00116989	0.00132343	0.00115883	0.00142784	0.00135602	0.00116524	0.000706906	0.00117825	0.000940788
8823.72	0.00124768	0.00157024	0.00115709	0.00136676	0.00121014	0.00150726	0.00138957	0.00131721	0.000675051	0.00114003	0.000941636
8824	0.00141143	0.0016177	0.00104233	0.00128665	0.00109731	0.00136029	0.00135963	0.00113338	0.000633262	0.00110702	0.000901054
8824.28	0.00139474	0.00156637	0.00111826	0.00127358	0.00112824	0.00148939	0.00131502	0.00125044	0.000664482	0.00116698	0.000914434
8824.56	0.00134427	0.00160259	0.00104108	0.00120462	0.0010943	0.00141222	0.00134506	0.00121382	0.000635213	0.00112725	0.000889109
8824.83	0.00132746	0.00136336	0.00110536	0.00122855	0.00110128	0.00154711	0.00140026	0.00122535	0.000634937	0.0011896	0.000888601
8825.11	0.00114816	0.00147987	0.000960746	0.00116663	0.00111116	0.00140531	0.00124161	0.00118578	0.000616955	0.00117735	0.000902571
8825.4	0.00131596	0.00137732	0.00104974	0.00129107	0.00104695	0.00136949	0.00119234	0.00116334	0.000640605	0.00113163	0.000889253
8825.69	0.00118843	0.00147912	0.00112249	0.00127768	0.00111872	0.00128365	0.00114131	0.00118177	0.000642131	0.00112409	0.0009011
8825.98	0.0012535	0.00140765	0.00116958	0.00120913	0.00110964	0.00135338	0.00124375	0.00111278	0.000625473	0.00118229	0.000868126
8826.25	0.00119118	0.00151192	0.00120192	0.0011252	0.00108415	0.00129728	0.0013093	0.00128218	0.000635098	0.00115591	0.00092079
8826.52	0.00123368	0.00140948	0.00114666	0.00118732	0.00108709	0.00116172	0.001253	0.00119475	0.000617131	0.00112473	0.000888596
8826.78	0.00123769	0.00138901	0.0011814	0.00121932	0.00110156	0.00125898	0.00121626	0.00120288	0.00063816	0.00107422	0.000833067
8827.06	0.00118049	0.00142088	0.00100409	0.00116457	0.000999655	0.00116192	0.00114331	0.00111438	0.000613495	0.000997364	0.000879224
8827.33	0.00122413	0.00130194	0.00108089	0.00116294	0.000970616	0.00132385	0.00122222	0.00112178	0.000632213	0.00102306	0.000856681
8827.62	0.00111219	0.00141507	0.000936029	0.00111234	0.00100618	0.00116338	0.00115043	0.00117329	0.000647506	0.00102448	0.000821668
8827.91	0.00116748	0.00128933	0.000991067	0.00114829	0.000918437	0.0012958	0.00115101	0.00114678	0.00066331	0.0010275	0.00079311
8828.2	0.00110732	0.00137687	0.00096578	0.00112393	0.00101453	0.00118176	0.00113756	0.00113913	0.000642689	0.00102375	0.000807858
8828.47	0.00118461	0.00120118	0.000977686	0.0011257	0.000979394	0.00126951	0.00104543	0.00109197	0.000647559	0.00102509	0.000793482
8828.75	0.0010661	0.00129696	0.000868391	0.00108382	0.00100792	0.00120201	0.00109184	0.00118498	0.000631668	0.000970147	0.000829867
8829.01	0.00115732	0.00115242	0.000930935	0.00114111	0.000898424	0.00112629	0.00106572	0.00100621	0.000588777	0.000961943	0.000742934
8829.29	0.00108723	0.00120034	0.000945987	0.00115359	0.00092736	0.00121521	0.00108545	0.00117906	0.000595368	0.000923118	0.000729258
8829.56	0.00111197	0.00118342	0.0008611	0.00111452	0.000907393	0.00111828	0.00100516	0.00112403	0.000600023	0.000922153	0.000727829
8829.85	0.00105188	0.00108453	0.00102773	0.00112573	0.000883664	0.0012092	0.000976055	0.00109539	0.000614719	0.000963141	0.000751698
8830.13	0.0010579	0.00117181	0.000884023	0.00101494	0.0009025	0.00108695	0.00093184	0.00102296	0.000567317	0.000947525	0.000832311
8830.42	0.00111651	0.00116268	0.000976015	0.00112243	0.000874258	0.00117338	0.00108055	0.00102809	0.000550442	0.000939264	0.000763853
8830.7	0.00104675	0.00127698	0.000835244	0.00102471	0.000887185	0.00106898	0.00100057	0.00105208	0.000556897	0.000895998	0.000761997
8830.98	0.00111784	0.00116287	0.000911467	0.000970692	0.00086353	0.00114496	0.00103418	0.00102529	0.00058181	0.000962225	0.000733016
8831.26	0.00111524	0.0011366	0.00090948	0.00099752	0.000990974	0.00118804	0.000910704	0.00108089	0.000548724	0.0009468	0.000746442
8831.54	0.00109217	0.00105437	0.000884874	0.000971427	0.000898029	0.00105452	0.000859365	0.00102723	0.000545798	0.000960188	0.00069137
8831.82	0.00103081	0.00110216	0.000882332	0.00103096	0.000903093	0.00114084	0.000971316	0.00113168	0.000544344	0.000936023	0.000694184
8832.11	0.00105311	0.00113603	0.000833251	0.00100448	0.000888732	0.00105828	0.000922052	0.000983122	0.000534015	0.000939105	0.000661733
8832.4	0.0010115	0.00121917	0.000860003	0.000938586	0.000859348	0.00110647	0.000956178	0.000995749	0.000553912	0.000935077	0.00073082
8832.69	0.00093993	0.00118127	0.000796789	0.000895163	0.000814187	0.000962977	0.000805826	0.000976601	0.000523989	0.000862962	0.000603954
8832.98	0.00102085	0.0010271	0.000918617	0.000956517	0.00085688	0.00107551	0.000913924	0.000992648	0.000519346	0.000875733	0.000668563
8833.24	0.000952897	0.00113805	0.000758551	0.000907177	0.000824826	0.00104565	0.000826368	0.000980157	0.000484485	0.00084991	0.000677916
8833.5	0.000971111	0.00101291	0.000769551	0.000936714	0.000770996	0.00101716	0.000910081	0.000927152	0.000479196	0.000841685	0.000688182
8833.77	0.00085837	0.00117311	0.000764588	0.000887484	0.000856482	0.000963092	0.000925897	0.000975583	0.000492638	0.00080779	0.000673429
8834.05	0.000958286	0.00108827	0.00074979	0.000914606	0.000747019	0.00100841	0.000921486	0.000844822	0.000460936	0.000812883	0.000698549
8834.33	0.000830334	0.00114147	0.000702793	0.000951607	0.000794538	0.00111057	0.000899789	0.000926357	0.000455022	0.000807757	0.000687816
8834.61	0.000850989	0.00120059	0.000679489	0.000856919	0.000778888	0.00106782	0.000869515	0.000825216	0.000452563	0.000757252	0.000647704
8834.9	0.000967661	0.00102864	0.000784734	0.000931053	0.000796594	0.00112354	0.000975608	0.000881985	0.000459077	0.000808699	0.000628905
8835.18	0.000862093	0.0011441	0.000715204	0.000843675	0.000830561	0.000940666	0.000999581	0.000887098	0.000445183	0.000822014	0.000559226
8835.45	0.000904618	0.00106738	0.000814274	0.000898298	0.000740375	0.00105035	0.000873024	0.0008979	0.00045532	0.000806503	0.000623177
8835.72	0.000759325	0.00118104	0.000601379	0.0008246	0.000729374	0.000962843	0.000809373	0.00077986	0.000408551	0.000766628	0.000685375
8836	0.000821528	0.00102744	0.000635878	0.000934846	0.000722962	0.00111379	0.000859053	0.000862321	0.000433205	0.00073946	0.000614493
8836.28	0.000829225	0.00113523	0.00059362	0.000880144	0.000788787	0.0010557	0.000783049	0.000906401	0.000411685	0.000730349	0.000603465
8836.56	0.00089081	0.00118317	0.000542017	0.00079428	0.000700486	0.00109319	0.00085807	0.000797584	0.000349128	0.000744174	0.000640458
8836.85	0.000797104	0.00126315	0.00054843	0.000825404	0.000725982	0.00118008	0.000714883	0.000827093	0.000367106	0.000701766	0.000616862
8837.14	0.000832373	0.00106284	0.000640389	0.000795638	0.000652671	0.00109056	0.000771957	0.000711607	0.000357255	0.000662954	0.000556682
8837.42	0.000777344	0.00107288	0.000616247	0.000832694	0.000693366	0.00114634	0.000740296	0.000698634	0.000333933	0.000636502	0.000579592
8837.7	0.000775877	0.00104549	0.000548536	0.000797988	0.000630741	0.000872355	0.000755388	0.000680043	0.000318171	0.000655224	0.000552857
8837.98	0.000722345	0.000962255	0.000654264	0.000846326	0.000655726	0.000854185	0.000747983	0.000897066	0.000354556	0.000665453	0.000558447
8838.26	0.000673393	0.000968718	0.000520192	0.000690424	0.000692265	0.000742872	0.000786712	0.000758383	0.000314202	0.000666443	0.000560568
8838.53	0.000715285	0.000814413	0.00060681	0.000813922	0.000622757	0.000828487	0.000881376	0.000697786	0.00037938	0.000661803	0.000578646
8838.82	0.000642093	0.000970276	0.000495147	0.000779569	0.000708908	0.000836777	0.00079359	0.000715022	0.000373314	0.000599157	0.000489478
8839.12	0.000740263	0.000860553	0.000568266	0.000777942	0.000663968	0.000850288	0.000763438	0.000641788	0.000382299	0.000689628	0.000518702
8839.4	0.000716454	0.000926982	0.000457423	0.000817811	0.000681309	0.000927678	0.000729496	0.00068139	0.000361438	0.000681662	0.000516416
8839.67	0.000716417	0.000999385	0.000518271	0.0007574	0.000561931	0.000837124	0.000849238	0.000601488	0.000356465	0.000653275	0.000487741
8839.95	0.000657438	0.000997802	0.000486037	0.000744961	0.000651317	0.000822907	0.00068885	0.000632937	0.000387161	0.000599347	0.000551123
8840.22	0.000717211	0.000934193	0.000415651	0.000705674	0.00063274	0.000742305	0.000596498	0.000535747	0.000348843	0.000545821	0.000506794
8840.49	0.000757906	0.000957384	0.000472568	0.000656031	0.000561142	0.000795562	0.000667565	0.000707033	0.000366023	0.000555299	0.000460496
8840.77	0.000594528	0.000990264	0.00040232	0.000637071	0.000555013	0.000666028	0.000625717	0.000665813	0.00033947	0.00057922	0.000435619
8841.05	0.000668284	0.000860859	0.000454509	0.000694783	0.000609583	0.000869151	0.000744044	0.000733241	0.000360732	0.000616514	0.000420262
8841.34	0.000562494	0.000937827	0.00035298	0.000659598	0.000597699	0.000796749	0.000671427	0.000512035	0.000337268	0.000549432	0.000410798
8841.63	0.000731851	0.000875655	0.00053699	0.000621557	0.000464715	0.00084905	0.000649132	0.000514187	0.000302897	0.000562746	0.000432951
8841.9	0.000628722	0.000936253	0.000417147	0.000625541	0.00053477	0.000783565	0.000588522	0.000520953	0.000276024	0.00057439	0.000464411
8842.17	0.00068376	0.00091437	0.000450006	0.000631548	0.000538687	0.000843854	0.000628947	0.000591759	0.000314357	0.000586095	0.000403407
8842.45	0.000569654	0.000903284	0.000357376	0.000579698	0.000545983	0.000707611	0.000708371	0.000615699	0.000324988	0.000544226	0.000386253
8842.72	0.000631842	0.000867633	0.000451907	0.000655642	0.000455966	0.000714499	0.000539522	0.000472426	0.000309019	0.000482843	0.00033567
8843.01	0.000496522	0.000854249	0.0004405	0.000679515	0.000507453	0.000806977	0.000555941	0.000581823	0.000318508	0.000465576	0.000376123
8843.3	0.000572883	0.000787699	0.000352269	0.000600923	0.000537172	0.000666004	0.000584012	0.000536651	0.000274023	0.000480897	0.00040502
8843.58	0.000607361	0.000715912	0.000459128	0.000628557	0.000493138	0.00079215	0.000627753	0.000537168	0.000286351	0.000439335	0.000418379
8843.87	0.000526377	0.000858154	0.000301497	0.000562464	0.000524464	0.000695884	0.000453125	0.000450118	0.000261367	0.000430984	0.000399006
8844.16	0.000582711	0.000694024	0.000404196	0.000626683	0.000520803	0.000780699	0.00056338	0.000483854	0.000288343	0.000479669	0.00033562
8844.44	0.000493325	0.000770654	0.000337518	0.000637926	0.000521842	0.000639806	0.000617202	0.0004388	0.000234126	0.000413069	0.000378247
8844.72	0.000596752	0.000573332	0.000449235	0.000665642	0.000384248	0.000730459	0.000575525	0.000377949	0.000218959	0.000472621	0.000414243
8845	0.000494269	0.000756185	0.000371851	0.000548426	0.000490434	0.000706773	0.000545311	0.000481264	0.000225486	0.000467162	0.000367143
8845.28	0.000579066	0.000760568	0.000417271	0.000588231	0.000419497	0.000605446	0.00050916	0.000360234	0.000224559	0.000470664	0.000303458
8845.57	0.000495509	0.000794446	0.00037398	0.000553879	0.000460269	0.000704854	0.000516524	0.000486822	0.000246513	0.000449517	0.000304858
8845.86	0.000513039	0.000816169	0.00035026	0.000493524	0.000392114	0.000633952	0.000489807	0.000401215	0.000194534	0.000402473	0.000309672
8846.14	0.000502751	0.000728954	0.000430534	0.000515041	0.000454291	0.00070281	0.000550116	0.000502701	0.000236606	0.000413858	0.000299933
8846.42	0.000503962	0.000861819	0.000325177	0.000473969	0.000399106	0.000649796	0.000515797	0.000465407	0.00021373	0.000449541	0.000273895
8846.69	0.000551986	0.000688162	0.000312345	0.000535296	0.000407236	0.00070603	0.000494832	0.00051652	0.000241168	0.000448669	0.000336326
8846.95	0.000369083	0.000799838	0.000277463	0.000432031	0.000409791	0.000549082	0.000485715	0.000434506	0.000217184	0.00039452	0.000260193
8847.22	0.000553924	0.000588351	0.000426219	0.000462856	0.000365232	0.000638645	0.000479429	0.000430945	0.000216532	0.000371802	0.000268795
8847.49	0.000360378	0.000714636	0.00036502	0.000472533	0.000363595	0.000633973	0.000434997	0.000496087	0.000198973	0.000318867	0.000251221
8847.77	0.00044631	0.000670391	0.000362574	0.000442864	0.000322894	0.000582488	0.000545363	0.000436136	0.000195796	0.000353666	0.000250828
8848.06	0.000320532	0.000619564	0.000427629	0.000426988	0.000385643	0.000628924	0.000574205	0.000401285	0.000205202	0.000388122	0.000272012
8848.35	0.000386223	0.000556423	0.000336566	0.000418539	0.000311085	0.000584281	0.000456733	0.000357772	0.000213087	0.000394922	0.000298231
8848.63	0.000403385	0.000476788	0.000390066	0.000478789	0.00029332	0.000687172	0.000382544	0.000416425	0.00023473	0.000377538	0.000330463
8848.91	0.000352651	0.000727169	0.000245876	0.00041248	0.000295854	0.000475345	0.000344983	0.000371882	0.000199096	0.000295992	0.000256043
8849.18	0.000435646	0.000551025	0.000395695	0.000437493	0.000244601	0.000556772	0.000383656	0.000409387	0.000169769	0.000280416	0.000265241
8849.46	0.000336307	0.000709847	0.000325465	0.000410636	0.000292003	0.000446538	0.000354814	0.000379483	0.000171241	0.000324208	0.000240365
8849.74	0.000385814	0.000591915	0.000340861	0.000400165	0.000320115	0.000505659	0.000356548	0.000399042	0.000166059	0.000324367	0.00019965
8850.03	0.000315643	0.000597438	0.000310897	0.000435086	0.000317171	0.000492848	0.000410731	0.000477856	0.000168528	0.000261028	0.000223388
8850.31	0.000421019	0.000471729	0.000305921	0.000461457	0.000311544	0.000475137	0.000321758	0.000380542	0.000194963	0.000252673	0.000191416
8850.6	0.000287497	0.000584834	0.000319774	0.000372654	0.00037325	0.000444997	0.000401753	0.00041092	0.000162872	0.00024187	0.000193319
8850.88	0.000364478	0.000508347	0.000294811	0.000365475	0.000248518	0.00040805	0.000455091	0.000373145	0.000163179	0.000241575	0.000169698
8851.17	0.000392173	0.000467708	0.000329194	0.000460875	0.000323071	0.000440157	0.000402649	0.000411924	0.000174929	0.000264322	0.000243057
8851.44	0.000370809	0.00051543	0.000231245	0.00042192	0.000269114	0.000406383	0.000296212	0.000292895	0.000153198	0.000324678	0.000177917
8851.73	0.000383572	0.000459605	0.000321741	0.000441657	0.000339752	0.000464007	0.000362565	0.000423971	0.000165786	0.000275455	0.000225358
8852.01	0.000261203	0.000540857	0.000129245	0.000403166	0.0003428	0.000354261	0.000321725	0.000389367	0.000123377	0.000248935	0.000135535
8852.31	0.000373357	0.000353439	0.000291688	0.000485555	0.000307933	0.000364789	0.000419824	0.00036859	0.000148648	0.000230217	0.000216276
8852.6	0.000312043	0.000446653	0.000317297	0.000461994	0.000269913	0.000319707	0.000391799	0.000274401	0.000185841	0.000204796	0.000185456
8852.89	0.000350768	0.000319539	0.000327867	0.000327577	0.000251515	0.000423143	0.000318469	0.000307948	0.000157891	0.000260356	0.000191888
8853.17	0.000281615	0.000366911	0.000249544	0.000221712	0.000271616	0.000362676	0.000261192	0.000307971	0.000137462	0.000290455	0.000179811
8853.44	0.000338173	0.000235485	0.000372609	0.000276631	0.00032104	0.00039363	0.000328819	0.000213145	0.000128791	0.000342325	0.000149472
8853.69	0.00012828	0.000240084	0.000277344	0.000290129	0.000283857	0.000427641	0.000306946	0.000261718	0.000120649	0.000276081	0.000157522
8853.97	0.00027575	0.000263702	0.000245027	0.000269024	0.000201912	0.000305822	0.000198658	0.000103743	8.46369e-05	0.000164313	0.000171652
8854.24	0.000254164	0.00024883	0.0003828	0.000324306	0.000270625	0.000349506	0.00036591	0.000265017	0.000102309	0.000243374	0.000162504
8854.52	0.000265918	0.000296116	0.000290369	0.000244576	0.000248503	0.000227713	0.000302725	0.000242925	0.000105985	0.000253068	7.28087e-05
8854.82	0.000330837	0.000215826	0.000337354	0.000366121	0.000245741	0.000321071	0.000275971	0.000279355	0.000134261	0.000235122	6.83305e-05
8855.11	0.000264344	0.000384443	0.000196345	0.000244198	0.000262635	0.000142046	0.000188605	0.000236676	0.000100284	0.000192613	7.12337e-05
8855.4	0.000382865	0.000170126	0.000357085	0.000320344	0.000164533	0.000270273	0.00034028	0.00026476	0.000115438	0.000196318	2.84626e-05
8855.67	0.000214582	0.000304277	0.000255331	0.000257461	0.000222179	0.000109134	0.000285642	0.000366401	8.48434e-05	0.00017728	5.79236e-05
8855.94	0.000285534	0.000164778	0.000285473	0.000289808	0.000247871	0.00022889	0.000235412	0.000270634	8.03853e-05	0.000165656	5.16881e-05
8856.21	0.000158544	0.000241986	0.000292695	0.000239581	0.000286552	0.000247235	0.000283801	0.000264812	9.09509e-05	0.000173873	0.000117252
8856.49	0.000196238	0.000173171	0.000297693	0.000215448	0.000160572	0.000250501	0.000312743	0.000196497	7.89973e-05	0.000205389	4.08172e-05
8856.77	0.00019969	0.000198651	0.000314955	0.000235614	0.000202866	0.000259644	0.000214014	0.000302651	0.000100014	0.000207057	8.49665e-05
8857.06	0.000207706	0.000150875	0.000257087	0.000239464	0.000255091	0.000101048	0.000226184	0.000146103	8.59525e-05	0.000178768	6.06932e-05
8857.35	0.000198431	0.000127904	0.000322267	0.000244649	0.000264721	0.000313126	0.000272058	0.000204859	7.22174e-05	0.000223414	9.70891e-05
8857.63	0.000204351	0.000249372	0.000222898	0.000196235	0.000224788	0.000147059	0.00017003	0.000156111	4.64547e-05	0.000191263	4.13314e-05
8857.91	0.000346346	0.000117119	0.000271252	0.000274085	0.0001967	0.000103349	0.00027035	0.000205161	6.96379e-05	0.000202265	3.39043e-05
8858.19	0.000171164	0.000157365	0.000172961	0.000214414	0.000178219	6.36832e-05	0.000177396	0.000224305	6.36602e-05	0.000188196	4.74941e-05
8858.48	0.000286097	3.41927e-05	0.00027401	0.000160645	0.000186051	0.000183299	0.000125219	0.000177774	4.79545e-05	0.000173286	4.57515e-05
8858.75	0.000166994	0.000133341	0.000143467	0.000118726	0.000255499	8.23214e-05	8.89153e-05	0.000269114	2.8942e-05	0.000102739	7.49972e-05
8859.04	0.000328392	1.3338e-05	0.000244492	0.00012202	0.00020558	0.000101986	0.000139241	0.000120379	2.52984e-05	0.000121304	2.02405e-05
8859.33	0.00012304	9.74856e-05	0.000257141	0.000240172	0.000218682	7.0167e-05	0.000255605	0.000182366	4.58149e-05	0.000158379	3.89508e-05
8859.62	0.000167437	6.31096e-05	0.000264552	0.000174231	0.000235461	-0.000104532	0.000238769	0.000147923	1.59722e-05	9.94209e-05	1.12163e-05
8859.91	0.000184745	3.26447e-05	0.000349549	0.000187835	0.000184172	5.69944e-05	0.000140736	0.000166945	1.21931e-05	0.000117403	4.00438e-05
8860.18	0.000144471	2.69211e-05	0.000251472	0.00013306	0.000143595	-0.000105376	0.000140449	7.17434e-05	-8.46316e-06	0.000141209	-2.29959e-06
8860.44	0.000162232	-0.000160952	0.000335381	0.000134044	0.000131089	7.76639e-05	0.000175657	0.00024315	-1.68617e-05	0.000101293	7.01704e-06
8860.72	0.00017347	7.62108e-05	0.000227769	8.52609e-05	0.000147418	-2.80824e-05	0.000125004	0.000207526	-3.20487e-05	5.14433e-05	-4.70479e-05
8861	0.00019931	-0.000177976	0.000297562	0.000127067	0.000151104	6.08018e-05	9.69541e-05	0.0001477	-7.63873e-06	0.000100194	-5.0004e-06
8861.29	7.72118e-05	-6.04748e-05	0.00026206	6.94209e-05	0.000166029	-8.72509e-05	9.55468e-05	8.31456e-05	5.3613e-07	0.000155979	-1.59823e-06
8861.58	0.000117803	-5.15482e-05	0.000366849	8.30299e-05	0.000106371	-4.52766e-05	0.000104611	8.85699e-05	-4.72162e-06	0.000113866	-4.92941e-06
8861.87	5.58129e-05	3.65334e-06	0.000299617	6.95128e-05	0.00011766	-5.99123e-05	2.54591e-05	0.000250556	-2.12966e-05	4.38577e-05	3.72865e-05
8862.16	0.000214115	-7.62281e-05	0.00024683	0.000115361	5.63603e-05	-6.7654e-05	0.000101936	0.000154762	-3.86431e-05	9.68594e-05	-2.20939e-05
8862.43	5.68346e-05	-0.000185429	0.000322223	0.000128947	0.000116435	-2.9559e-06	0.000131739	0.000222107	1.20318e-05	9.0936e-05	-3.29577e-05
8862.71	5.19104e-05	-0.000126979	0.000259928	8.75476e-05	8.6905e-05	-0.00022243	4.00301e-05	2.72471e-05	-3.1242e-05	8.43934e-05	-9.46921e-05
8862.98	0.000174276	-0.00022906	0.000366018	0.000178793	8.16878e-05	-2.83299e-05	0.000114955	0.000118045	-3.28914e-05	4.77209e-05	-2.49282e-05
8863.26	0.000107438	-0.000203666	0.000184524	3.44831e-05	0.000108321	-0.000116594	4.36583e-05	9.25244e-05	-4.22899e-05	2.88614e-05	-2.45229e-05
8863.54	0.000147682	-0.000269393	0.000267677	0.000112505	3.27874e-05	-4.13025e-05	6.0502e-05	8.95763e-05	-1.72906e-05	0.00012139	-7.29574e-05
8863.82	3.44099e-05	-7.0201e-05	0.000205371	-1.58601e-05	4.93021e-05	-0.000168458	-1.67879e-06	0.000137227	-4.25317e-05	9.97365e-05	-8.66314e-05
8864.11	0.000116131	-0.000219409	0.000210081	5.85791e-05	4.52507e-05	-9.06476e-05	9.98372e-05	0.000112995	-3.45034e-05	0.000115343	-3.68118e-05
8864.39	1.08954e-05	-0.000141421	0.000223095	-1.38821e-05	1.69566e-05	-8.8214e-05	0.000122295	0.000191679	-4.75993e-05	0.000109746	-8.65942e-05
8864.67	8.9454e-05	-0.000229967	0.000257235	8.12844e-05	5.18345e-05	-9.87019e-05	1.71007e-05	0.000103359	-6.17638e-05	8.97468e-05	-0.000144832
8864.95	5.14925e-05	-0.000261035	0.000219232	4.43189e-05	0.000101314	-0.000155299	0.000113705	0.000148877	-4.45393e-05	7.14299e-05	-7.37762e-05
8865.23	3.3543e-05	-0.000242281	0.00013883	4.37992e-06	9.60312e-05	-0.000211728	4.4969e-06	6.16547e-05	-7.98694e-05	1.78371e-05	-0.00010912
8865.51	9.48422e-05	-0.000312106	0.000198637	1.99701e-05	4.20285e-05	-9.61269e-05	-5.82788e-05	0.000193255	-5.68488e-05	4.88558e-05	-6.663e-05
8865.81	7.82511e-06	-0.000194862	0.000141314	-6.26907e-05	3.07607e-05	-0.000234168	-4.38034e-05	3.90935e-05	-7.44246e-05	1.60742e-05	-0.000138315
8866.1	9.28984e-05	-0.000290561	0.000282015	7.33148e-05	5.17927e-05	-0.000136347	7.99198e-05	1.28997e-05	-5.43885e-05	1.08425e-05	-0.000137453
8866.39	2.70247e-05	-9.3401e-05	0.00013538	-7.86235e-05	4.74807e-05	-0.00018035	6.54742e-05	4.15529e-06	-0.000118371	-1.44981e-05	-7.25791e-05
8866.67	4.50163e-05	-0.000304782	0.000283767	1.06123e-05	2.34029e-05	-0.00017501	2.33095e-05	4.7257e-05	-9.7331e-05	-3.66729e-05	-9.84987e-05
8866.95	1.73886e-05	-0.000207513	0.000143094	-1.74814e-05	7.82969e-05	-0.000246009	-2.92426e-05	0.000155605	-0.000101564	-1.13185e-05	-4.84513e-05
8867.22	0.000105777	-0.000371044	0.000160551	1.32074e-05	-3.55263e-05	-0.000203845	1.36075e-05	5.17953e-05	-7.56693e-05	2.58876e-05	-0.000167525
8867.49	-3.37042e-05	-0.000384325	0.000179421	-0.000102832	-3.88365e-05	-0.00020111	2.24853e-05	1.46732e-05	-5.63245e-05	-5.49487e-06	-0.000147489
8867.77	-6.09594e-06	-0.000299814	0.000166143	-0.000164928	-5.55625e-05	-0.000259531	-8.91679e-05	-1.97079e-05	-9.88299e-05	2.14491e-05	-0.000152108
8868.06	1.00658e-05	-0.000362459	0.000200115	-9.31833e-05	7.10338e-06	-0.000231184	-2.89692e-05	0.000124369	-0.000102183	-1.72601e-05	-0.000135396
8868.34	-7.8741e-05	-0.000248002	0.000133455	-0.000121392	-2.49432e-05	-0.000254582	-0.000116817	3.80538e-05	-0.000112869	-9.86383e-05	-0.000127756
8868.63	-6.53167e-05	-0.0003638	0.000223974	-7.82177e-06	2.13242e-05	-0.000200011	-0.000179308	0.000117456	-9.65971e-05	-6.3613e-05	-0.000157452
8868.91	-0.000109754	-0.00029465	0.000121149	-0.000108136	-2.87945e-05	-0.00027819	-0.000188004	-5.11494e-06	-9.84036e-05	-6.90015e-05	-0.000136554
8869.19	2.31147e-05	-0.00042833	0.000176364	-8.97686e-05	-7.29653e-05	-0.000207034	-5.04623e-05	-6.81445e-06	-7.9359e-05	-0.00010857	-0.000151126
8869.46	-5.01408e-05	-0.000317877	0.000106412	-0.000144481	-4.42778e-05	-0.000324049	-0.000146588	2.20905e-05	-0.000137785	-0.000148343	-0.0001493
8869.74	-2.712e-05	-0.000399105	0.000153253	-9.23795e-05	-0.000128914	-0.000303917	-0.000176645	-5.71113e-05	-0.00014979	-0.00012566	-0.00020616
8870.03	-0.000156474	-0.000328818	6.10676e-05	-9.87551e-05	-8.2248e-05	-0.000201207	-0.000202829	-1.54921e-05	-0.000136723	-0.00011612	-0.000146402
8870.31	-3.34108e-05	-0.00044765	9.48123e-05	-0.000111938	-6.44157e-05	-0.000250183	-0.000134114	-4.7172e-05	-0.000154929	-0.000130326	-0.000184657
8870.59	-0.000116106	-0.000470628	0.000122892	-5.44584e-05	-4.81902e-05	-0.000263782	-8.03056e-05	4.39915e-05	-0.00014914	-0.00010702	-0.000146155
8870.88	-6.55128e-05	-0.000422592	6.77728e-05	-0.000133873	-6.7657e-05	-0.000392247	-0.000203777	-1.92827e-05	-0.000179386	-8.62383e-05	-0.000214177
8871.16	-4.16483e-05	-0.000507769	0.000130261	-0.000101642	-0.000114744	-0.000288159	-1.75063e-05	4.35456e-05	-0.000174629	-0.000115341	-0.000144827
8871.44	-0.000210266	-0.00042991	4.93049e-05	-0.000177545	-0.000126501	-0.000335639	-0.000100801	-3.38763e-05	-0.000162343	-0.000121715	-0.000210705
8871.72	-0.000222454	-0.000581433	9.96639e-05	-0.000112163	-0.000140072	-0.000228098	-0.000133515	-7.92392e-06	-0.000146397	-0.000100849	-0.000231168
8871.99	-0.000213177	-0.000511253	4.02931e-05	-0.000218587	-0.000103659	-0.000298821	-0.000118122	-5.93293e-05	-0.000167166	-8.18597e-05	-0.000216841
8872.28	-0.000155916	-0.000565061	0.000117253	-0.000159456	-0.000152913	-0.000253492	-0.00020483	-0.000155292	-0.000165013	-0.000147731	-0.000225054
8872.58	-0.00015954	-0.000321261	-1.27308e-05	-9.76164e-05	-0.000143308	-0.000333107	-0.00019739	-7.74776e-05	-0.000197986	-0.000181956	-0.000208507
8872.87	-7.42499e-05	-0.000381123	4.03202e-05	-0.00015278	-0.000176476	-0.000306018	-0.000217738	-0.000118976	-0.000201376	-0.000142882	-0.000220957
8873.17	-0.000144888	-0.000418862	1.28724e-05	-0.000179679	-0.000134333	-0.000193011	-0.000137088	-6.12665e-05	-0.000181344	-0.000172638	-0.000185988
8873.46	-0.000171129	-0.000428833	-2.58314e-05	-0.000247697	-0.000145481	-0.000378657	-0.000314252	-0.000213723	-0.000213575	-0.000173932	-0.000184277
8873.74	-0.000155735	-0.000417381	5.99683e-05	-0.000142037	-0.000189896	-0.000236745	-0.000133584	-8.79074e-05	-0.000196139	-0.000175778	-0.000226342
8874	-0.000230962	-0.000409612	-9.26358e-05	-0.000260161	-0.0002716	-0.000336283	-0.000239485	-0.000112444	-0.000227877	-0.000176462	-0.000243122
8874.27	-0.000105733	-0.00057197	9.99954e-06	-0.000177156	-0.000174984	-0.00033992	-0.000185633	-8.51778e-06	-0.00017416	-0.000201295	-0.000210857
8874.56	-0.000195073	-0.000454781	-0.000114227	-0.000210984	-0.000205813	-0.000405693	-0.000175364	-0.00022465	-0.000207851	-0.000191662	-0.000316372
8874.84	-0.000131776	-0.000539631	-6.13632e-05	-0.00020047	-0.000220554	-0.000317793	-0.000202238	-0.000174614	-0.000199095	-0.000174337	-0.000300595
8875.12	-0.000196188	-0.000350158	-0.000136308	-0.000257907	-0.000182662	-0.00040584	-0.000207161	-0.000128623	-0.000205772	-0.000217	-0.000285111
8875.4	-0.000226239	-0.000473103	-7.77966e-05	-0.00016583	-0.000214196	-0.000320684	-0.000216615	-0.000193071	-0.000230344	-0.000188005	-0.000319519
8875.68	-0.000220853	-0.000411796	-0.000199252	-0.000138304	-0.000204246	-0.000385866	-0.000332114	-0.000160523	-0.000208278	-0.000223419	-0.000282997
8875.95	-0.000270623	-0.000360119	-0.000152291	-0.000207593	-0.00023022	-0.000460552	-0.000284804	-0.000255318	-0.00024032	-0.000270999	-0.00031931
8876.22	-0.000181947	-0.00041302	-0.000101297	-0.000193378	-0.000222196	-0.00032553	-0.000243555	-9.46113e-05	-0.00024052	-0.000237991	-0.000298906
8876.5	-0.000214867	-0.000354169	-0.000170267	-0.00027775	-0.000285915	-0.000398339	-0.000252942	-0.0002186	-0.000244482	-0.0002236	-0.000275908
8876.79	-0.000179789	-0.000451297	-0.000125641	-0.000260766	-0.000277098	-0.000362066	-0.000276139	-0.000174305	-0.000239963	-0.00025427	-0.00030648
8877.08	-0.000255878	-0.000366881	-0.00020459	-0.00036095	-0.000230241	-0.000404375	-0.000415872	-0.000192939	-0.000270648	-0.000246739	-0.000389659
8877.36	-0.000201169	-0.000466746	-0.000125339	-0.000269931	-0.000230772	-0.000346988	-0.000293694	-0.000240845	-0.000280749	-0.00024567	-0.000332576
8877.65	-0.000286449	-0.000416437	-0.000175212	-0.000313183	-0.000240262	-0.00037407	-0.0002831	-0.000277916	-0.000299229	-0.000281863	-0.000354348
8877.93	-0.000260159	-0.000425986	-0.000176334	-0.000247128	-0.000303346	-0.000286421	-0.000169756	-0.000256621	-0.000289582	-0.000290776	-0.000347798
8878.21	-0.000282744	-0.000389501	-0.000177381	-0.000253255	-0.000302516	-0.000345203	-0.000187759	-0.000176341	-0.000275339	-0.000299489	-0.000315704
8878.49	-0.000217621	-0.00045526	-0.000159215	-0.000260924	-0.000286746	-0.000360725	-0.000289458	-0.000200506	-0.000266413	-0.000316487	-0.000339907
8878.77	-0.000305055	-0.000459185	-0.000128713	-0.00029817	-0.000212964	-0.000266332	-0.000281242	-0.000163096	-0.00024158	-0.000246989	-0.000315713
8879.06	-0.000376612	-0.000432092	-0.000169377	-0.000359976	-0.000237863	-0.000376252	-0.000395617	-0.000254792	-0.000263517	-0.000301264	-0.000305663
8879.35	-0.000266766	-0.000496941	-0.000158303	-0.000306946	-0.000304754	-0.000318901	-0.000363232	-0.000233747	-0.000287897	-0.000265587	-0.000362891
8879.65	-0.000316237	-0.00038903	-0.000274944	-0.000345438	-0.00026961	-0.000463912	-0.000462693	-0.000322805	-0.000305547	-0.000280907	-0.000368983
8879.94	-0.000236808	-0.000498191	-0.000214815	-0.000304013	-0.000287079	-0.00029103	-0.000405745	-0.000305197	-0.000259536	-0.00029616	-0.000314224
8880.23	-0.000371375	-0.000408055	-0.000356807	-0.000379968	-0.000311861	-0.00042736	-0.000425864	-0.000257495	-0.000300539	-0.000318456	-0.000349591
8880.51	-0.00027387	-0.000499901	-0.000281312	-0.000218137	-0.000319987	-0.000304816	-0.000353172	-0.000291042	-0.000275334	-0.000311117	-0.00039352
8880.78	-0.000334176	-0.000393225	-0.000355171	-0.000329685	-0.000288528	-0.000448401	-0.000361035	-0.000311535	-0.000278894	-0.000355325	-0.000296765
8881.05	-0.00029146	-0.000473972	-0.000363956	-0.000342121	-0.00033603	-0.000415125	-0.000354201	-0.00046654	-0.000283672	-0.000359445	-0.000411326
8881.33	-0.000410897	-0.000404747	-0.00040666	-0.000345022	-0.000328006	-0.000335889	-0.000333144	-0.000350351	-0.000330455	-0.000342326	-0.00039946
8881.61	-0.000315178	-0.000390652	-0.000296062	-0.000353353	-0.000412716	-0.000401614	-0.000340285	-0.000392901	-0.000334487	-0.000322221	-0.000423359
8881.9	-0.000258798	-0.000333882	-0.000306867	-0.000282656	-0.00039695	-0.000354753	-0.000324378	-0.000330737	-0.000300373	-0.000353939	-0.000341739
8882.19	-0.000303379	-0.000334162	-0.000314024	-0.000440311	-0.000360892	-0.000462036	-0.000354615	-0.000369529	-0.000301847	-0.000384387	-0.00041074
8882.47	-0.000253188	-0.000377896	-0.000325447	-0.000417406	-0.000348776	-0.000289418	-0.000340241	-0.000412372	-0.000284267	-0.000397672	-0.000349687
8882.75	-0.000449536	-0.000312678	-0.00038375	-0.000481659	-0.000330395	-0.000429485	-0.00049437	-0.000381584	-0.000333076	-0.000422712	-0.000437544
8883.03	-0.000321643	-0.000295112	-0.000284863	-0.000384845	-0.000408629	-0.000386662	-0.000423373	-0.000431509	-0.00031707	-0.000418194	-0.000414985
8883.31	-0.000434091	-0.000200266	-0.000496261	-0.000398821	-0.000394601	-0.000405009	-0.000443208	-0.000352639	-0.000350607	-0.000455143	-0.000384994
8883.59	-0.000337121	-0.000389467	-0.000359981	-0.00036	-0.000367572	-0.000346439	-0.000505636	-0.000440058	-0.000341857	-0.000450059	-0.000438378
8883.88	-0.000348395	-0.000297613	-0.000414376	-0.000279793	-0.000276325	-0.000310266	-0.000602474	-0.000410533	-0.000340392	-0.000438931	-0.0004368
8884.17	-0.000320153	-0.000247739	-0.000491271	-0.000446863	-0.000372731	-0.000423449	-0.000592427	-0.000443242	-0.000336824	-0.000448399	-0.000446849
8884.45	-0.000351988	-0.000239906	-0.000492227	-0.000313592	-0.000416577	-0.000307878	-0.000491409	-0.000379398	-0.000307377	-0.000494758	-0.000410527
8884.73	-0.000512685	-0.000276447	-0.000554401	-0.000362588	-0.000409732	-0.000406656	-0.000448177	-0.000514761	-0.000340832	-0.000513201	-0.000498953
8885.01	-0.000340933	-0.000399895	-0.000399088	-0.000302771	-0.000442104	-0.000265974	-0.000473393	-0.000439667	-0.000333183	-0.000481227	-0.000442488
8885.29	-0.000440994	-0.000335274	-0.000530525	-0.000445989	-0.00038791	-0.000463516	-0.000528808	-0.000456147	-0.000330038	-0.000510717	-0.000448759
8885.57	-0.000426465	-0.000424257	-0.000450102	-0.000379492	-0.000404682	-0.000336541	-0.000458182	-0.000469158	-0.000335063	-0.000435636	-0.000400873
8885.85	-0.000424428	-0.000345198	-0.000556006	-0.000452388	-0.000324991	-0.000392887	-0.000514809	-0.000499543	-0.000370143	-0.000435181	-0.00040441
8886.14	-0.00036199	-0.000482882	-0.000439225	-0.000501984	-0.000362776	-0.000395417	-0.000583004	-0.000444764	-0.000358808	-0.000457949	-0.000478335
8886.44	-0.000514984	-0.0003901	-0.000551356	-0.000521828	-0.000390106	-0.000432341	-0.000568624	-0.000426758	-0.000377528	-0.000469917	-0.000437109
8886.73	-0.000429309	-0.000413603	-0.000530876	-0.000426015	-0.000421111	-0.000408434	-0.000464455	-0.000599696	-0.000378595	-0.000444901	-0.000437433
8887.02	-0.000437903	-0.00042256	-0.00050272	-0.000480781	-0.000364569	-0.000248504	-0.000549472	-0.000475047	-0.000366979	-0.000496604	-0.000409219
8887.3	-0.000390391	-0.000422293	-0.000567452	-0.00054377	-0.000421593	-0.000476131	-0.000512537	-0.000499306	-0.000394348	-0.00053533	-0.000438776
8887.56	-0.000438263	-0.00035411	-0.000470474	-0.000441071	-0.000413872	-0.000385059	-0.000482267	-0.000471934	-0.000365652	-0.000569473	-0.000491547
8887.83	-0.000518765	-0.000231459	-0.000631083	-0.000480185	-0.000472459	-0.000468328	-0.000633733	-0.00053737	-0.000378345	-0.000534734	-0.0005314
8888.12	-0.000501566	-0.000432218	-0.000500878	-0.000456257	-0.000542256	-0.000421481	-0.000544479	-0.000425144	-0.000351706	-0.000473371	-0.000438649
8888.4	-0.000593039	-0.000366349	-0.000564315	-0.00051247	-0.000477913	-0.000396972	-0.000543487	-0.000482468	-0.000381114	-0.000504902	-0.000480658
8888.7	-0.000421509	-0.000435159	-0.000559323	-0.00039801	-0.000504004	-0.000338281	-0.000639893	-0.00050991	-0.000365472	-0.000515465	-0.000466071
8888.99	-0.000499044	-0.000314663	-0.000667333	-0.000446275	-0.00048871	-0.000388902	-0.000594093	-0.00045738	-0.000360676	-0.000560342	-0.000465995
8889.27	-0.000467532	-0.000388796	-0.000594247	-0.000489442	-0.000502773	-0.000406587	-0.000585182	-0.000533759	-0.000346337	-0.000528609	-0.000479716
8889.55	-0.000559423	-0.000310372	-0.000685988	-0.000409076	-0.000458357	-0.000386379	-0.000603488	-0.000481234	-0.000385452	-0.000515881	-0.000461842
8889.83	-0.000490207	-0.000359553	-0.000613481	-0.000468386	-0.000448809	-0.000445266	-0.000517136	-0.00059946	-0.00040239	-0.000515747	-0.000543297
8890.11	-0.000458267	-0.000338101	-0.000557247	-0.00046863	-0.000495742	-0.000460211	-0.000474779	-0.000447705	-0.000378962	-0.000507905	-0.000496802
8890.4	-0.000475399	-0.000354011	-0.000691955	-0.000592185	-0.000488114	-0.000617681	-0.000662485	-0.000610177	-0.000435558	-0.000516506	-0.0005349
8890.68	-0.000506937	-0.00038475	-0.000619795	-0.000485119	-0.000507128	-0.000495513	-0.00059059	-0.000594895	-0.000403047	-0.000540053	-0.00046467
8890.95	-0.00050867	-0.000314449	-0.000680989	-0.000493158	-0.000472362	-0.000550926	-0.000635169	-0.000626726	-0.00040571	-0.000598958	-0.000489631
8891.24	-0.000366895	-0.000355135	-0.000579341	-0.000474629	-0.000526993	-0.000394482	-0.000541953	-0.000591971	-0.000365987	-0.000553045	-0.000495119
8891.53	-0.000486705	-0.000308419	-0.000651821	-0.000509224	-0.000478089	-0.000531584	-0.000603149	-0.000516548	-0.000412095	-0.000529514	-0.000470259
8891.81	-0.000491031	-0.000377851	-0.000600169	-0.000539846	-0.000507411	-0.000401157	-0.000459758	-0.000585438	-0.000419427	-0.000505843	-0.000515387
8892.09	-0.000547912	-0.000413648	-0.000695473	-0.000551864	-0.000506554	-0.00041784	-0.00063736	-0.00059425	-0.000371166	-0.000488068	-0.000515815
8892.37	-0.000510508	-0.000396719	-0.000595906	-0.000517359	-0.000496157	-0.000431617	-0.00063654	-0.000643923	-0.000379049	-0.000516622	-0.00057127
8892.66	-0.000568501	-0.000390642	-0.000608027	-0.000570256	-0.000499163	-0.000387766	-0.000622104	-0.000528342	-0.000416425	-0.000579145	-0.000536935
8892.95	-0.000499023	-0.00035574	-0.000635906	-0.000559208	-0.000516611	-0.000510685	-0.000561142	-0.000622597	-0.000450626	-0.000624803	-0.000506177
8893.24	-0.000428607	-0.000450716	-0.000602509	-0.000533706	-0.000521673	-0.000380325	-0.000608882	-0.000533377	-0.000411459	-0.000570826	-0.000503148
8893.54	-0.000544821	-0.000299427	-0.00068083	-0.000597461	-0.00049178	-0.000512461	-0.000686936	-0.00076538	-0.000459959	-0.000578312	-0.000551829
8893.82	-0.00045173	-0.000404564	-0.000562523	-0.000518442	-0.00046503	-0.00039724	-0.000611701	-0.00061593	-0.000409528	-0.000564916	-0.000579162
8894.09	-0.000496622	-0.000282837	-0.000713329	-0.000575868	-0.000531297	-0.00048171	-0.00062166	-0.000635775	-0.000457856	-0.000559654	-0.000542794
8894.37	-0.000400929	-0.000480643	-0.00059835	-0.000498855	-0.000540071	-0.000436189	-0.000573886	-0.000626032	-0.000441555	-0.000545619	-0.000541141
8894.64	-0.000537645	-0.000394874	-0.000742497	-0.000616847	-0.000519695	-0.000558027	-0.000636786	-0.000637628	-0.000421664	-0.000571938	-0.000490177
8894.92	-0.000539411	-0.000450737	-0.000605887	-0.000666711	-0.000561945	-0.000503462	-0.000532771	-0.000615463	-0.000415812	-0.000510409	-0.000541918
8895.21	-0.000563228	-0.000443365	-0.000622456	-0.000646645	-0.000496534	-0.000527062	-0.00053259	-0.000507919	-0.000424	-0.000535514	-0.000517446
8895.5	-0.000498722	-0.000523867	-0.000619341	-0.000557465	-0.00050246	-0.000558296	-0.000697816	-0.000582296	-0.000449138	-0.000555948	-0.00055425
8895.8	-0.000541147	-0.000547872	-0.000562913	-0.000466065	-0.000520543	-0.000506404	-0.000655322	-0.000575271	-0.000425657	-0.000527682	-0.000532343
8896.08	-0.000677509	-0.000416887	-0.000610263	-0.000575534	-0.000484307	-0.000700251	-0.000682715	-0.000591001	-0.000425822	-0.0005437	-0.000558526
8896.35	-0.00057273	-0.000578736	-0.000590528	-0.000576116	-0.000462303	-0.000482654	-0.000543377	-0.000465345	-0.000421571	-0.00058534	-0.000541415
8896.62	-0.000715065	-0.000500557	-0.000664293	-0.000639737	-0.000519517	-0.000608568	-0.000691784	-0.000526555	-0.000430334	-0.000625709	-0.000526314
8896.9	-0.000534491	-0.000598979	-0.000541186	-0.000594219	-0.000534943	-0.000528712	-0.000583848	-0.000579193	-0.000419725	-0.000631793	-0.000565768
8897.18	-0.00060904	-0.000491648	-0.000655161	-0.000640448	-0.000496927	-0.000572292	-0.000633479	-0.000544212	-0.000427728	-0.00064708	-0.000488303
8897.47	-0.000590429	-0.000612024	-0.000492435	-0.000557826	-0.000548196	-0.000510686	-0.000582839	-0.000576995	-0.000427555	-0.000580326	-0.00052471
8897.76	-0.000653963	-0.00051473	-0.00057819	-0.000625019	-0.000471202	-0.000485934	-0.000624067	-0.000502035	-0.000412285	-0.000557251	-0.000511372
8898.05	-0.000642843	-0.000603305	-0.000516953	-0.000595504	-0.000491795	-0.000708541	-0.000619695	-0.000600842	-0.000440216	-0.000562885	-0.00060833
8898.34	-0.000638255	-0.000599819	-0.000491024	-0.000561925	-0.000580259	-0.000624202	-0.000580176	-0.000602098	-0.000426398	-0.000540291	-0.000562823
8898.63	-0.000622023	-0.000569628	-0.000544079	-0.000579491	-0.000607754	-0.000650397	-0.00061977	-0.000684059	-0.000461951	-0.000561631	-0.000570113
8898.91	-0.000542533	-0.000620533	-0.000501262	-0.000480414	-0.000559217	-0.00053364	-0.000604781	-0.000577359	-0.000441236	-0.00054022	-0.000509495
8899.18	-0.000654239	-0.000560942	-0.000676341	-0.000605786	-0.000501412	-0.000707053	-0.000642381	-0.000622328	-0.000452427	-0.000573424	-0.000537488
8899.47	-0.000588395	-0.000675694	-0.000589647	-0.000553452	-0.000542502	-0.000631365	-0.000648069	-0.000607099	-0.000460289	-0.000624498	-0.000539579
8899.76	-0.000611556	-0.000543135	-0.000625226	-0.00060052	-0.000512854	-0.00074858	-0.000686519	-0.000597178	-0.000482073	-0.000650039	-0.000545551
8900.06	-0.000518474	-0.000697209	-0.000571375	-0.000614931	-0.000530154	-0.000553057	-0.00062615	-0.000531755	-0.000446839	-0.000603029	-0.000544059
8900.35	-0.000651431	-0.000624862	-0.000646757	-0.000665941	-0.000480416	-0.000675656	-0.000571485	-0.000537571	-0.000479294	-0.000581418	-0.000494974
8900.63	-0.000531791	-0.000692814	-0.000555615	-0.000621802	-0.000547152	-0.000687135	-0.00051425	-0.000612952	-0.000446609	-0.000571754	-0.000510432
8900.9	-0.000641841	-0.00063228	-0.000519405	-0.000609675	-0.000546502	-0.00059009	-0.000611254	-0.000544505	-0.000444028	-0.000592387	-0.000539771
8901.18	-0.000600913	-0.000700149	-0.00052946	-0.000670804	-0.000498863	-0.000730213	-0.000666039	-0.000664883	-0.00049361	-0.000573362	-0.000607668
8901.46	-0.000540832	-0.00078149	-0.000507974	-0.000582607	-0.000496865	-0.000692773	-0.000611711	-0.000580535	-0.000452229	-0.000529001	-0.000520843
8901.74	-0.000625544	-0.000679581	-0.000553424	-0.000680794	-0.000536829	-0.000787424	-0.000681909	-0.000581825	-0.000469727	-0.00052632	-0.000541443
8902.03	-0.000425911	-0.000799765	-0.000533479	-0.000612449	-0.000547179	-0.000613829	-0.000763334	-0.000571182	-0.000441133	-0.000578608	-0.000543609
8902.32	-0.000599135	-0.000754373	-0.000595436	-0.000608498	-0.000510788	-0.000822526	-0.000704474	-0.00057141	-0.00049177	-0.000653998	-0.000573648
8902.61	-0.000521004	-0.000726572	-0.00051739	-0.000587704	-0.000508004	-0.000668558	-0.000587224	-0.000537358	-0.000451665	-0.000599959	-0.000549447
8902.89	-0.000671461	-0.000646745	-0.0006011	-0.00056763	-0.000401393	-0.000689084	-0.000708018	-0.000587993	-0.000469117	-0.000620302	-0.000530291
8903.16	-0.000582588	-0.00079262	-0.000541739	-0.000552279	-0.00049351	-0.000633396	-0.000609893	-0.000588097	-0.000459181	-0.000545787	-0.000559049
8903.43	-0.000678433	-0.000697916	-0.000472793	-0.000646331	-0.000439296	-0.000719591	-0.000671808	-0.000507638	-0.000432362	-0.000523228	-0.000536531
8903.71	-0.000620215	-0.000752485	-0.00045633	-0.000556288	-0.000540412	-0.000731265	-0.000572015	-0.000681786	-0.000454681	-0.000552472	-0.000532204
8904	-0.000610305	-0.000665732	-0.000467982	-0.000511439	-0.000519673	-0.000720986	-0.000513241	-0.000517978	-0.000455529	-0.000586782	-0.000466615
8904.28	-0.000523906	-0.000626572	-0.000541129	-0.000640437	-0.000515544	-0.000697759	-0.000645178	-0.000632277	-0.000482616	-0.00060152	-0.000553707
8904.57	-0.000455702	-0.000722302	-0.000483893	-0.000580229	-0.000541737	-0.000657262	-0.000556196	-0.000554141	-0.000448499	-0.000562554	-0.000519466
8904.86	-0.000614346	-0.000727036	-0.000581617	-0.000674141	-0.00050858	-0.000772908	-0.000514018	-0.000619038	-0.000465271	-0.000579713	-0.000538916
8905.16	-0.000515382	-0.000804393	-0.000422848	-0.000696842	-0.000531747	-0.000702762	-0.000555185	-0.000497412	-0.000440632	-0.000576078	-0.000551027
8905.44	-0.000655183	-0.000737759	-0.000538391	-0.000679287	-0.000500301	-0.000802244	-0.000606226	-0.000460193	-0.000459428	-0.000627702	-0.000486725
8905.72	-0.000594878	-0.000813471	-0.000460932	-0.000531877	-0.000558496	-0.000783934	-0.000526586	-0.000524206	-0.000460325	-0.000624222	-0.000536887
8906	-0.000621321	-0.000686404	-0.000454498	-0.00056084	-0.00051721	-0.000786588	-0.000514563	-0.000575441	-0.000463859	-0.000535308	-0.00049167
8906.29	-0.00056008	-0.000828227	-0.000415439	-0.000585905	-0.000617932	-0.000774246	-0.000621365	-0.000574726	-0.000441484	-0.000508341	-0.000517011
8906.58	-0.000512372	-0.000807134	-0.000438333	-0.000580251	-0.000552023	-0.000829029	-0.000549533	-0.000441965	-0.000424827	-0.000537026	-0.000482386
8906.88	-0.00060692	-0.000796425	-0.000491283	-0.000680155	-0.000537548	-0.000804915	-0.000588268	-0.000550491	-0.000448588	-0.000556144	-0.000506252
8907.17	-0.000625363	-0.000759377	-0.000433554	-0.000581932	-0.000488241	-0.000638734	-0.000525603	-0.000513159	-0.000424367	-0.000578503	-0.0004782
8907.45	-0.000674799	-0.000678307	-0.000527375	-0.000615021	-0.000500824	-0.000778254	-0.000639839	-0.000603599	-0.000434325	-0.000564104	-0.000502441
8907.73	-0.000599452	-0.000849822	-0.000521353	-0.000500266	-0.000583036	-0.000706202	-0.000599954	-0.000532049	-0.000432408	-0.000545419	-0.000454546
8908	-0.000618772	-0.000699853	-0.00065133	-0.000670353	-0.000536763	-0.000878153	-0.000619066	-0.000482862	-0.000450468	-0.000615505	-0.00048632
8908.28	-0.000499189	-0.000750946	-0.000445722	-0.000537451	-0.000525559	-0.000693377	-0.000651386	-0.00062619	-0.000455505	-0.000613777	-0.000519118
8908.56	-0.000620049	-0.000675568	-0.000611898	-0.000676472	-0.000490219	-0.00073509	-0.000644851	-0.000602443	-0.000471344	-0.000591722	-0.000538534
8908.84	-0.000676202	-0.000717556	-0.000515855	-0.000652758	-0.000552781	-0.000782357	-0.00051778	-0.00063368	-0.000438883	-0.000526889	-0.000474504
8909.14	-0.000706163	-0.000660472	-0.000482256	-0.000551273	-0.00052378	-0.000693708	-0.000622595	-0.000507997	-0.000413535	-0.000546251	-0.000500684
8909.43	-0.000577709	-0.000710538	-0.000524568	-0.000555317	-0.000560332	-0.000735272	-0.000620413	-0.000604411	-0.000402894	-0.000552056	-0.000498584
8909.71	-0.000618232	-0.000720936	-0.00058924	-0.000606577	-0.00055822	-0.000666507	-0.000605387	-0.000529271	-0.000386998	-0.000570613	-0.000429557
8909.99	-0.000590615	-0.000711105	-0.000603323	-0.000595199	-0.000514426	-0.000787974	-0.000663264	-0.000632405	-0.000431458	-0.000583675	-0.000451508
8910.27	-0.000564317	-0.000705493	-0.000580324	-0.000623885	-0.00052368	-0.000631849	-0.000543069	-0.000639833	-0.000418505	-0.000586222	-0.000470593
8910.55	-0.000586536	-0.000590101	-0.000588169	-0.000592392	-0.000511003	-0.000769223	-0.000605469	-0.000610468	-0.000439691	-0.000604895	-0.000501034
8910.84	-0.000579651	-0.000769454	-0.000579291	-0.00065774	-0.000554853	-0.000625344	-0.000592582	-0.000673192	-0.000407791	-0.000591279	-0.000446896
8911.14	-0.000640409	-0.000656023	-0.000622757	-0.000598096	-0.000525705	-0.000697094	-0.000519837	-0.000642678	-0.000410068	-0.000579936	-0.000512377
8911.42	-0.000614997	-0.00063481	-0.000577226	-0.000588693	-0.000585515	-0.000626048	-0.000566511	-0.000614844	-0.000417937	-0.000565974	-0.000451893
8911.71	-0.000598399	-0.000548584	-0.000627932	-0.000591404	-0.000530259	-0.000598129	-0.000568595	-0.000557926	-0.000430987	-0.000561825	-0.000462087
8912	-0.000616176	-0.000638421	-0.000552747	-0.000536699	-0.000565797	-0.000713459	-0.000691993	-0.000664139	-0.000425829	-0.000566668	-0.000514949
8912.29	-0.000633885	-0.000630993	-0.000546748	-0.000598085	-0.000509159	-0.000592344	-0.000551729	-0.000481678	-0.000369931	-0.000599035	-0.000487281
8912.57	-0.000570023	-0.000621541	-0.000552612	-0.000673618	-0.000496099	-0.000708058	-0.00066191	-0.000621752	-0.000424873	-0.000557219	-0.000524377
8912.85	-0.000555822	-0.00067616	-0.000567777	-0.000557176	-0.000552497	-0.000554683	-0.000544984	-0.000604611	-0.000394531	-0.000552232	-0.000505414
8913.14	-0.000565475	-0.000600317	-0.000625502	-0.000642826	-0.000554507	-0.000704692	-0.000624968	-0.000580186	-0.00039948	-0.000640184	-0.000479657
8913.43	-0.000540625	-0.000710374	-0.000535835	-0.000659258	-0.000571159	-0.000638703	-0.000477724	-0.000596363	-0.000389605	-0.000653168	-0.000508677
8913.71	-0.000569216	-0.00050381	-0.000622057	-0.000618276	-0.000535401	-0.000626248	-0.000554781	-0.000638231	-0.000424661	-0.000623543	-0.000508176
8914.01	-0.000538857	-0.000631409	-0.000508236	-0.000547456	-0.000563357	-0.000580859	-0.000543292	-0.000614514	-0.000391587	-0.000545645	-0.000483812
8914.28	-0.000607997	-0.000512876	-0.000643138	-0.000633918	-0.000510367	-0.000501118	-0.000602518	-0.000582213	-0.000377957	-0.000568853	-0.000424569
8914.56	-0.000653993	-0.000565839	-0.000620014	-0.000468583	-0.000561055	-0.00055446	-0.000581545	-0.000727728	-0.000396187	-0.000594633	-0.00051992
8914.84	-0.000646421	-0.000538723	-0.000581768	-0.000639627	-0.0005182	-0.000454864	-0.000508601	-0.000617868	-0.000389269	-0.000546523	-0.000459488
8915.12	-0.000568868	-0.000489089	-0.000563288	-0.000682399	-0.000556253	-0.000622814	-0.000600644	-0.000698339	-0.000394712	-0.000534619	-0.000456038
8915.4	-0.000539557	-0.000480987	-0.000621048	-0.000542286	-0.000505736	-0.000483164	-0.000569228	-0.000595411	-0.000381039	-0.000573034	-0.000481605
8915.69	-0.000573719	-0.000503539	-0.000691137	-0.000631151	-0.000565603	-0.00050671	-0.000619361	-0.000671754	-0.000390139	-0.000641294	-0.000494015
8915.99	-0.000492288	-0.000590076	-0.000534007	-0.000588494	-0.000549354	-0.000442258	-0.000571249	-0.000528998	-0.000359198	-0.000580619	-0.000446655
8916.28	-0.000578464	-0.00047456	-0.000639574	-0.000539604	-0.000538137	-0.000601323	-0.000513541	-0.000607119	-0.000360533	-0.000558189	-0.000450756
8916.55	-0.00057898	-0.000605033	-0.000602624	-0.000562653	-0.000560397	-0.000547778	-0.000437188	-0.00067811	-0.000338516	-0.000542126	-0.00046038
8916.82	-0.000587976	-0.000497074	-0.000650688	-0.000589145	-0.000536073	-0.000526211	-0.000599758	-0.000655856	-0.00036075	-0.000563132	-0.000414757
8917.09	-0.000570167	-0.000496837	-0.000616319	-0.00055071	-0.000548454	-0.000463096	-0.000459781	-0.000597876	-0.000341641	-0.000571854	-0.000446175
8917.38	-0.000599853	-0.000408552	-0.000647013	-0.000582101	-0.00046397	-0.000518156	-0.000606692	-0.00053203	-0.000352685	-0.000604011	-0.000516371
8917.67	-0.000480455	-0.000382309	-0.000624568	-0.000554442	-0.000497756	-0.00051771	-0.000571524	-0.000649501	-0.000347689	-0.000573933	-0.000477955
8917.96	-0.000508828	-0.000370707	-0.000609618	-0.000500248	-0.000480299	-0.00039169	-0.000462583	-0.000614463	-0.000337252	-0.000558299	-0.00036232
8918.26	-0.000558017	-0.000384382	-0.0007094	-0.000554847	-0.00054157	-0.000542823	-0.000450526	-0.000656402	-0.000371143	-0.000542514	-0.000413852
8918.55	-0.000547133	-0.000468746	-0.000555902	-0.000501047	-0.000478581	-0.000429659	-0.00049804	-0.000536042	-0.000314295	-0.000569283	-0.000389195
8918.84	-0.000608317	-0.000386227	-0.000633632	-0.000511599	-0.000478866	-0.000472595	-0.000493313	-0.000550147	-0.000316145	-0.000589856	-0.000458651
8919.13	-0.000537803	-0.000458886	-0.000581816	-0.000452898	-0.000506803	-0.000365348	-0.000465612	-0.000596525	-0.000315407	-0.000562253	-0.000410131
8919.41	-0.00052931	-0.000398317	-0.000665285	-0.00048802	-0.000503457	-0.000438938	-0.000596683	-0.000549701	-0.000334871	-0.000561589	-0.000395835
8919.7	-0.000512549	-0.000497186	-0.000542741	-0.000513409	-0.000584515	-0.000365326	-0.000492276	-0.000623028	-0.000277371	-0.000497906	-0.000431657
8919.98	-0.000568756	-0.000264164	-0.00061293	-0.00054687	-0.000491845	-0.000470788	-0.000539721	-0.000587363	-0.000305617	-0.000428399	-0.00039787
8920.27	-0.000466253	-0.000380957	-0.000582959	-0.000558276	-0.0005388	-0.000461386	-0.000518554	-0.000643003	-0.000290833	-0.000422457	-0.00043333
8920.57	-0.000519939	-0.000400848	-0.000581198	-0.000497615	-0.000452405	-0.000409696	-0.000407933	-0.00046783	-0.000267067	-0.000537235	-0.000380958
8920.86	-0.000548826	-0.000399093	-0.000577637	-0.000517597	-0.000447898	-0.000522867	-0.000463008	-0.000589305	-0.000311249	-0.00055823	-0.000390377
8921.14	-0.000523535	-0.000441177	-0.000534101	-0.000555627	-0.00045312	-0.000334133	-0.000406278	-0.000543095	-0.000260949	-0.000469546	-0.000353017
8921.42	-0.000545761	-0.000343812	-0.000635753	-0.000577971	-0.000499538	-0.000453923	-0.000528401	-0.000599597	-0.000260241	-0.000443935	-0.000340216
8921.69	-0.000453618	-0.000376796	-0.000577371	-0.000522275	-0.000500494	-0.000356964	-0.000409833	-0.000569542	-0.000235095	-0.00048299	-0.00031559
8921.97	-0.0005003	-0.000306369	-0.000645327	-0.000574938	-0.000427496	-0.000390127	-0.00048912	-0.000536957	-0.000273531	-0.000479127	-0.000311838
8922.25	-0.000420812	-0.00045194	-0.000592015	-0.000415308	-0.000473554	-0.000210527	-0.000530746	-0.000552384	-0.00027302	-0.00046026	-0.000346582
8922.54	-0.000547152	-0.000386984	-0.000636329	-0.00049742	-0.000438681	-0.000315693	-0.000528889	-0.000554808	-0.000265569	-0.000487301	-0.000354193
8922.84	-0.000378655	-0.000445017	-0.000518107	-0.000407368	-0.000502419	-0.00040299	-0.000464737	-0.000513316	-0.000229997	-0.000485463	-0.000319555
8923.12	-0.000505057	-0.000323655	-0.000535181	-0.000572069	-0.000451171	-0.000303608	-0.000429105	-0.000388827	-0.000215681	-0.000465916	-0.000290731
8923.4	-0.000442685	-0.000457353	-0.000534923	-0.000523844	-0.000477831	-0.000411038	-0.000330179	-0.000504606	-0.000234616	-0.000390018	-0.000326804
8923.68	-0.000494389	-0.000355047	-0.000485213	-0.000451534	-0.000524963	-0.000386327	-0.000494525	-0.000456737	-0.000220215	-0.000395651	-0.000266709
8923.95	-0.000441975	-0.000280032	-0.000560719	-0.000496338	-0.000474631	-0.000501602	-0.000502748	-0.00053582	-0.000226886	-0.000445903	-0.000322703
8924.24	-0.000444855	-0.000524392	-0.000451864	-0.000466182	-0.000471118	-0.000319987	-0.000380963	-0.000404727	-0.000211597	-0.000446627	-0.000296493
8924.52	-0.00038133	-0.000295336	-0.000549097	-0.000448022	-0.00044321	-0.000386899	-0.0003416	-0.00047284	-0.00020994	-0.00040569	-0.00026733
8924.81	-0.000348081	-0.000379597	-0.000508066	-0.000394474	-0.000414761	-0.000271391	-0.000444965	-0.00050371	-0.000200139	-0.000368452	-0.000288143
8925.1	-0.000468568	-0.000319342	-0.000578787	-0.000443079	-0.000400617	-0.00040944	-0.000404625	-0.000427741	-0.000200626	-0.000416139	-0.000290934
8925.39	-0.000376655	-0.000356614	-0.000465435	-0.000398659	-0.000454634	-0.000256249	-0.000349815	-0.000522327	-0.000180357	-0.000387269	-0.000231118
8925.68	-0.000452385	-0.000268623	-0.000446242	-0.00033352	-0.000415266	-0.000297375	-0.000434852	-0.000421628	-0.000159589	-0.000378214	-0.000169343
8925.98	-0.000374116	-0.000353424	-0.000467397	-0.000363606	-0.000424238	-0.000267042	-0.000413427	-0.000503357	-0.000163067	-0.000350396	-0.000187701
8926.26	-0.000414763	-0.000354238	-0.000453037	-0.000360999	-0.000301246	-0.000353648	-0.00030331	-0.000326187	-0.000127085	-0.000330715	-0.000156344
8926.54	-0.000424399	-0.0003011	-0.000467926	-0.000367661	-0.000336345	-0.000320181	-0.000303801	-0.00040374	-0.000154853	-0.000301381	-0.000181049
8926.82	-0.000368763	-0.000325271	-0.000359151	-0.000313548	-0.000309574	-0.000210815	-0.000211926	-0.000353338	-0.000135526	-0.000241968	-0.000157377
8927.12	-0.000410768	-0.000352881	-0.000457334	-0.000331896	-0.000321991	-0.000339542	-0.000273719	-0.000388972	-0.0001468	-0.000287323	-0.000211371
8927.43	-0.000347986	-0.00041412	-0.000327089	-0.000332936	-0.000340311	-0.000203545	-0.000201908	-0.000300715	-0.00012293	-0.000313125	-0.000134428
8927.73	-0.000425143	-0.000209731	-0.000387315	-0.000417601	-0.000243488	-0.000366968	-0.000255882	-0.000254113	-0.000138671	-0.000307367	-0.000134201
8928.01	-0.000340651	-0.000336655	-0.000248298	-0.000290967	-0.00032173	-0.000265294	-0.000280818	-0.000322388	-0.000121759	-0.00027852	-0.000150164
8928.29	-0.000303422	-0.000295266	-0.000332153	-0.000304236	-0.000320573	-0.00027023	-0.000289659	-0.000294554	-8.83515e-05	-0.000265042	-0.000149948
8928.56	-0.000207287	-0.00031054	-0.000301553	-0.000252549	-0.000336313	-0.000293794	-0.000183231	-0.000366633	-6.63673e-05	-0.000256226	-0.000179309
8928.83	-0.000381187	-0.000154491	-0.000274836	-0.000316072	-0.000293414	-0.000255466	-0.000201412	-0.000232855	-8.7282e-05	-0.000301805	-0.00011493
8929.11	-0.000146429	-0.000243066	-0.000266306	-0.000401351	-0.000284402	-0.000342268	-0.000250444	-0.000288753	-6.68476e-05	-0.000275369	-9.43096e-05
8929.4	-0.000195178	-0.00036524	-0.000181385	-0.000357232	-0.00024459	-0.000289074	-0.000191823	-0.000287691	-2.76056e-05	-0.000207042	-2.02036e-05
8929.7	-0.000239685	-0.000245707	-0.000245017	-0.000387999	-0.000252299	-0.000342595	-0.000232494	-0.000288521	-2.1306e-05	-0.000246721	-1.30618e-05
8929.99	-0.000232263	-0.000314034	-0.000142264	-0.000271312	-0.000264575	-0.000147453	-0.000146713	-0.000176507	-4.94717e-06	-0.000239966	-4.59717e-05
8930.27	-0.000271829	-0.000200838	-0.000237033	-0.000327288	-0.000206422	-0.000268571	-0.000145499	-0.000257899	-4.49718e-05	-0.000175562	-3.05242e-05
8930.55	-0.000116045	-0.000365698	-0.000150867	-0.000204647	-0.000207436	-6.67722e-05	-0.000166654	-0.000235882	2.60158e-08	-0.000182982	3.10102e-05
8930.83	-0.000260947	-0.000241226	-0.000179324	-0.000305064	-0.000191726	-0.000191224	-0.000194451	-0.000213454	8.95741e-06	-0.000187701	1.95079e-05
8931.11	-0.000158284	-0.00017945	-0.000101934	-0.000258629	-0.00030334	-0.000171831	-0.000250667	-0.00021299	3.73069e-05	-0.000126187	-4.38571e-05
8931.4	-0.00021098	-0.000133509	-0.000109181	-0.000179042	-0.000219984	-0.000186886	-0.000191057	-0.000184709	3.21437e-05	-0.000170193	7.59763e-05
8931.68	-9.89546e-05	-0.000170799	-6.01173e-05	-0.000142976	-0.000186476	-0.000143689	-0.000118756	-0.000321705	2.79947e-05	-0.000175352	4.68636e-05
8931.97	-0.000176154	-0.000223818	-6.46905e-05	-7.63135e-05	-0.000184237	-0.000146513	-0.000131499	-0.000263932	4.84438e-05	-0.000125027	7.81126e-05
8932.27	-0.00015311	-0.000184186	-0.00017086	-0.000140994	-0.000190464	-0.000305207	-0.000118083	-0.000256141	4.45106e-05	-7.23329e-05	5.367e-05
8932.55	-0.00020421	-0.000302986	-4.3824e-05	-0.000155321	-0.000175648	-0.000133448	-5.12622e-05	-0.000168298	7.77305e-05	-5.7984e-05	0.000139958
8932.83	-0.000151365	-0.000269867	-3.53285e-05	-0.000182725	-9.80616e-05	-0.000204646	-4.63315e-05	-0.000160457	8.32538e-05	-9.01068e-05	0.00015065
8933.11	-0.000145139	-0.000368999	-3.1895e-05	-0.000160454	-0.000127395	-8.83506e-05	5.85471e-05	-6.66404e-05	0.00013366	-5.10656e-05	0.000141064
8933.4	-0.000198463	-0.000165701	-3.85053e-05	-0.000197263	-6.54356e-05	-0.000211757	-6.73169e-05	-2.39584e-05	0.000164183	-0.000100306	0.000104801
8933.68	-0.000118492	-0.000283667	5.41577e-05	-0.000140969	-6.14347e-05	-0.000183126	-2.60409e-05	-9.90598e-05	0.000192368	-2.74666e-05	0.000126111
8933.98	-0.000210069	-0.000176211	-1.25067e-05	-0.000107465	3.49013e-05	-0.000152862	-8.34952e-05	8.34925e-05	0.000212253	-1.07405e-06	0.000163876
8934.28	-4.7096e-05	-0.000306568	6.4905e-05	-3.34091e-05	-2.81977e-05	-0.000174767	3.67745e-05	-4.70067e-06	0.000214523	3.90366e-05	0.000163398
8934.58	-8.39807e-05	-0.00020464	9.83968e-05	1.33108e-05	2.81622e-05	-4.74362e-05	4.86472e-05	7.16099e-05	0.000225734	3.43014e-05	0.000202533
8934.87	-4.50946e-05	-0.000128552	1.30562e-06	-7.73918e-05	5.15597e-05	-0.000146203	9.86728e-05	-1.26368e-05	0.000211772	1.88647e-05	0.000178086
8935.14	-6.32465e-06	-0.000204144	0.000110855	-9.77931e-05	3.56274e-05	8.07173e-06	-1.31772e-05	4.17542e-05	0.000240311	7.79276e-05	0.000246956
8935.42	3.47167e-05	-0.000135818	8.35686e-05	-0.000132322	-2.63027e-05	-0.000173586	-2.04578e-05	-2.13473e-05	0.000264527	0.000122962	0.000233375
8935.7	9.03694e-05	-0.000191702	0.000234262	-1.37379e-05	-5.22877e-06	-4.28934e-05	0.000150161	6.28261e-05	0.000311243	0.000137129	0.000294959
8935.98	8.38781e-05	-6.10106e-05	5.99175e-05	-6.75993e-05	4.97757e-05	-0.00018005	-6.31897e-05	4.65409e-05	0.000304015	0.000120159	0.000257935
8936.27	1.53222e-05	-0.000156446	0.000168454	-2.9267e-05	9.63564e-06	1.07264e-05	9.89137e-05	0.000114294	0.000314184	0.000209296	0.000294846
8936.56	9.168e-06	-5.10915e-05	0.00010954	2.53152e-05	7.10604e-05	-8.67565e-05	0.000148668	0.000165872	0.000299299	0.000165333	0.00034655
8936.86	3.94814e-05	-0.000121438	0.000246481	0.000117653	5.10409e-05	-1.00419e-05	6.39541e-05	0.000157982	0.000318581	0.00019061	0.000335148
8937.14	-4.39122e-05	-4.27353e-05	0.000273141	7.92622e-05	8.37201e-05	4.51379e-05	0.000165034	0.000276219	0.000391367	0.000193914	0.000378472
8937.42	0.000122653	-2.34321e-05	0.0001827	0.000115823	7.94861e-05	-2.96622e-05	0.000246952	8.02691e-05	0.000430791	0.000187442	0.000420203
8937.69	9.15973e-05	-0.000109262	0.000170477	0.00013438	0.000111572	0.00012652	0.000174274	0.000238372	0.000424383	0.00025052	0.000448026
8937.98	0.000112214	-1.78646e-05	0.000113045	0.000138568	0.000127526	-9.43037e-06	0.000158905	0.000148697	0.000398352	0.000285615	0.000410449
8938.27	0.000171475	1.39811e-05	0.000368209	0.000235113	0.000151561	0.000195346	0.000292852	0.000232661	0.000481923	0.00027875	0.000434018
8938.56	9.37389e-05	0.000113756	0.000239473	0.000133975	0.000176869	-2.63343e-06	0.000163278	0.00019444	0.000474476	0.000250306	0.000447459
8938.85	0.000225285	-2.76532e-05	0.000266568	0.000208729	0.00014996	0.000208852	0.000110235	0.000225628	0.000493647	0.000290001	0.000491627
8939.14	0.000166461	0.000204762	0.000218116	0.000135207	0.000243991	0.000146295	0.000137997	0.000223707	0.000478754	0.000322808	0.000544118
8939.43	0.000226205	6.82856e-05	0.000358047	0.000334679	0.000215558	0.000146399	0.000214349	0.00026441	0.000525894	0.000350667	0.000569475
8939.72	0.00020969	0.000232608	0.000354211	0.000353515	0.000294449	0.000198293	0.000291133	0.000380608	0.00057449	0.000354427	0.000566773
8939.99	0.000332699	7.1026e-05	0.00033574	0.000301573	0.000281195	0.000144485	0.000325324	0.000306042	0.000559672	0.000397309	0.000561407
8940.27	0.00021568	6.38425e-05	0.000321863	0.00025237	0.000289922	0.000279114	0.000311857	0.000352825	0.000570163	0.000445387	0.000632746
8940.56	0.000318918	0.000103142	0.000381809	0.000220189	0.000295288	0.000231052	0.000233297	0.000378967	0.00060541	0.000495737	0.000616874
8940.86	0.000441136	0.000143878	0.000425219	0.000355422	0.000382263	0.000418139	0.000300423	0.000395925	0.000658106	0.000491135	0.00066355
8941.16	0.000280693	0.000240254	0.000326909	0.000309751	0.000379503	0.000283589	0.000368787	0.000308847	0.000639318	0.000511091	0.000692772
8941.46	0.000439842	0.000203523	0.000441037	0.000401707	0.00036718	0.000341758	0.000416481	0.000421913	0.000695006	0.000541368	0.00068903
8941.75	0.000395567	0.000360713	0.000406751	0.000289111	0.000465231	0.000378691	0.000347683	0.000430917	0.000689329	0.000596231	0.00073405
8942.03	0.000463601	0.000219137	0.000572635	0.000370255	0.000361058	0.000409461	0.000425972	0.000534225	0.000767894	0.000622726	0.000749741
8942.3	0.0003228	0.000449713	0.000457972	0.000436521	0.000477147	0.000343452	0.000382386	0.000459547	0.000793524	0.000620905	0.000834881
8942.57	0.00046758	0.000393503	0.000599641	0.000423573	0.000476771	0.000545558	0.000467514	0.000425939	0.000765205	0.000621176	0.000828375
8942.85	0.000363059	0.000481026	0.000552563	0.000454316	0.000519831	0.000540151	0.000469897	0.000579562	0.000807073	0.000634262	0.00087554
8943.15	0.000503996	0.000478347	0.000495349	0.000402838	0.000512313	0.000435218	0.000423938	0.000558185	0.000830986	0.000698484	0.000911308
8943.43	0.0005109	0.000442819	0.000579015	0.000587095	0.000533148	0.000514019	0.000533484	0.000609714	0.000907273	0.000719327	0.000970103
8943.73	0.000485921	0.000600746	0.000585782	0.000597675	0.000537472	0.000463543	0.000600896	0.000488887	0.000915022	0.000727186	0.000953236
8944.01	0.000656284	0.000527818	0.000715716	0.000562466	0.000612437	0.000660317	0.000640924	0.000505818	0.000963887	0.000734708	0.000979541
8944.3	0.000625709	0.00065322	0.000595183	0.00058424	0.000625418	0.000526228	0.000564604	0.000562093	0.000982936	0.000798113	0.00101463
8944.58	0.000557672	0.000563286	0.000726985	0.000755655	0.000615782	0.000644479	0.000613823	0.000691501	0.00104159	0.00084043	0.00107067
8944.87	0.000578122	0.000768302	0.000578141	0.000584372	0.000674661	0.000662007	0.000718937	0.000632136	0.00101972	0.000789977	0.00116638
8945.16	0.000716038	0.000583084	0.000698189	0.000655418	0.000633142	0.000723196	0.000653063	0.000612126	0.00106339	0.000810022	0.00116423
8945.45	0.000657577	0.000734768	0.000701522	0.000691794	0.000734637	0.000769862	0.000759806	0.000706878	0.00109689	0.000868299	0.00119509
8945.74	0.000703486	0.000719488	0.000714371	0.000723563	0.000737211	0.000771791	0.000734909	0.000619303	0.00113024	0.00095285	0.00123015
8946.02	0.000744869	0.000808063	0.000704805	0.000768213	0.000816621	0.000856004	0.000843012	0.000848871	0.00119296	0.000967009	0.00125873
8946.32	0.00081802	0.000910942	0.000729927	0.000698907	0.000782504	0.000820114	0.00079529	0.000787648	0.00120377	0.000938881	0.00125646
8946.6	0.000821616	0.000933498	0.000867216	0.000807676	0.000811428	0.000953015	0.000939948	0.00088207	0.001228	0.000968451	0.00131818
8946.89	0.000662529	0.00104818	0.000779511	0.000810912	0.000841775	0.000995999	0.000815469	0.000856729	0.00125139	0.000978265	0.00141472
8947.17	0.000759353	0.000899096	0.000886822	0.000992338	0.000865543	0.00106472	0.000903618	0.00101681	0.00131402	0.00103995	0.00142414
8947.46	0.000839095	0.00112177	0.000776838	0.000852726	0.000919956	0.000845644	0.00094801	0.00100509	0.00133733	0.00114631	0.00144231
8947.76	0.00105584	0.00104094	0.000863614	0.000975857	0.00089775	0.00100196	0.00105037	0.000932859	0.00135479	0.00117537	0.00148675
8948.06	0.000924377	0.001133	0.000875478	0.000976855	0.000992818	0.0010859	0.00102394	0.000974286	0.00141632	0.00117501	0.00156352
8948.36	0.000977832	0.00115326	0.00101457	0.00102974	0.000910964	0.0011362	0.001113	0.000964867	0.00149033	0.00122869	0.00156614
8948.65	0.00101569	0.00123282	0.00105382	0.00100733	0.00108258	0.0011964	0.00113857	0.00109806	0.0015277	0.0012499	0.00164607
8948.92	0.00106651	0.00122874	0.000950954	0.0010649	0.0010698	0.00119538	0.00110977	0.00103732	0.00154368	0.00128681	0.0016189
8949.19	0.00107373	0.00125103	0.00115135	0.00114314	0.00112266	0.00137204	0.00116091	0.00114898	0.00160697	0.0013474	0.0017373
8949.47	0.00104332	0.00129983	0.00104107	0.00116769	0.00111924	0.0012962	0.0012013	0.001139	0.00163602	0.00132568	0.00178741
8949.75	0.00124286	0.00129599	0.00107278	0.00126587	0.00111089	0.00143829	0.00130678	0.00120458	0.00170535	0.00139975	0.00181678
8950.05	0.0012328	0.00146041	0.00107042	0.00125039	0.00119688	0.00139832	0.00131198	0.00114191	0.00174518	0.00147911	0.00184256
8950.34	0.0013155	0.00136711	0.00122117	0.00126651	0.00118293	0.00150667	0.00140158	0.00118849	0.00178485	0.00151552	0.00192243
8950.63	0.00128731	0.00155032	0.0011316	0.00127482	0.00128403	0.00151439	0.00133032	0.00128427	0.00181048	0.00149254	0.00196548
8950.92	0.00135856	0.00151789	0.00124292	0.00137014	0.00129985	0.00147524	0.00148413	0.00129479	0.00190933	0.00159442	0.00206742
8951.2	0.00137199	0.00164962	0.00131059	0.00138942	0.00138047	0.0016251	0.00154551	0.00145725	0.00197179	0.00169964	0.00211991
8951.48	0.00137292	0.00161415	0.00131321	0.00143006	0.0013372	0.00153588	0.00139235	0.00134749	0.00201791	0.00173231	0.00210589
8951.77	0.00149739	0.00171507	0.00136168	0.00145177	0.00137998	0.00158773	0.00155207	0.00150378	0.002059	0.00171273	0.0021573
8952.06	0.00145059	0.00174052	0.00138601	0.00148184	0.00141421	0.00161495	0.00165119	0.0014672	0.0020791	0.00179021	0.00222725
8952.34	0.00154809	0.0017551	0.00151289	0.00166601	0.00156471	0.00190243	0.00168263	0.00164472	0.00217973	0.0018547	0.00225636
8952.63	0.0015462	0.00183242	0.00141538	0.00162319	0.00158227	0.00174682	0.00169735	0.00160273	0.00223439	0.00188973	0.00242041
8952.92	0.00166904	0.00180423	0.00151511	0.00166763	0.00153521	0.00188107	0.00174714	0.0016771	0.00229933	0.00193762	0.00248618
8953.21	0.00160087	0.00194688	0.00153874	0.00168713	0.00168445	0.00176169	0.0018437	0.00169613	0.0023442	0.00196302	0.00254601
8953.5	0.00180097	0.00193183	0.00166268	0.00182556	0.00172709	0.00194738	0.00192581	0.00173065	0.00240773	0.00203974	0.00259134
8953.78	0.00170119	0.00207291	0.00161728	0.00179933	0.00176206	0.00204688	0.00186859	0.00188509	0.0024312	0.00211634	0.00267229
8954.06	0.00188715	0.00207381	0.00167841	0.00189278	0.00184183	0.00202469	0.00200544	0.00184758	0.00248025	0.0022131	0.00266863
8954.35	0.0018778	0.00209969	0.00173764	0.00192978	0.00189426	0.00209238	0.00216741	0.00201902	0.00260477	0.00227949	0.00278472
8954.66	0.00191384	0.002242	0.00172516	0.00203651	0.00192486	0.00210113	0.00216058	0.00198586	0.0026441	0.00236041	0.00287099
8954.95	0.00193983	0.00223465	0.00186029	0.00216001	0.00198072	0.00227168	0.00217252	0.00213924	0.00272933	0.00240142	0.00300046
8955.26	0.00198667	0.00230929	0.00191032	0.0020776	0.00197294	0.00221792	0.00221249	0.0021341	0.00277062	0.00243707	0.00305474
8955.55	0.00218646	0.00225905	0.00207699	0.00213681	0.00208918	0.00235513	0.0023652	0.00216878	0.00289978	0.00253165	0.00314316
8955.82	0.00218061	0.00243366	0.00200139	0.00221865	0.00219146	0.00235095	0.00235529	0.00229749	0.00293986	0.00260359	0.00316947
8956.1	0.00224187	0.0024324	0.0021692	0.00232186	0.0021133	0.00250617	0.00241833	0.00238286	0.00301905	0.00272529	0.00321404
8956.38	0.00218959	0.00261686	0.00216736	0.0022674	0.00219452	0.00252758	0.00242851	0.0024062	0.003119	0.00272291	0.00336225
8956.66	0.00232542	0.0025654	0.00216983	0.00236468	0.00225082	0.00255038	0.00249721	0.0023878	0.00318694	0.00279321	0.00345519
8956.95	0.00235006	0.00269425	0.00228059	0.00243917	0.00242934	0.00266276	0.00258716	0.00250612	0.00329103	0.00291174	0.00354904
8957.25	0.00248122	0.00277968	0.0023431	0.00246882	0.00242331	0.00267755	0.00254778	0.00239021	0.00337295	0.00295019	0.00363006
8957.55	0.00261458	0.00282042	0.00241918	0.00262199	0.00255831	0.00279693	0.00275682	0.00259084	0.00347139	0.00300563	0.00370718
8957.83	0.00257024	0.00293435	0.00250935	0.00268778	0.00261141	0.00270504	0.00277272	0.00263694	0.0035561	0.00306356	0.00379323
8958.12	0.00274281	0.002879	0.00257483	0.00276526	0.00266259	0.0030384	0.00290724	0.00278894	0.00366343	0.00314575	0.00394008
8958.4	0.00270997	0.00316177	0.00259968	0.00283231	0.00271298	0.00300968	0.00283668	0.00275217	0.00375167	0.00323159	0.00409499
8958.68	0.00284142	0.00307434	0.00275025	0.0029163	0.00276817	0.00316829	0.00302242	0.00290085	0.00387837	0.00334421	0.00413253
8958.98	0.00282743	0.00325228	0.00273141	0.0029734	0.00292936	0.00308699	0.00311222	0.00298476	0.00396392	0.00338158	0.00422994
8959.27	0.0030205	0.00327961	0.00285312	0.00315055	0.00301119	0.00319919	0.0031945	0.00304711	0.00407799	0.00345562	0.00430135
8959.56	0.00292534	0.00345355	0.0028553	0.00314094	0.00309465	0.00335745	0.00322231	0.00320148	0.00419768	0.00357355	0.00444853
8959.85	0.00305227	0.0033934	0.00296661	0.00318651	0.00310547	0.00344078	0.00335284	0.00315682	0.00432242	0.00370282	0.00457405
8960.14	0.00316691	0.00353334	0.00306948	0.00330623	0.00321174	0.00360607	0.00346381	0.00325959	0.00444658	0.00377817	0.00475927
8960.42	0.00326415	0.00373337	0.00312908	0.00337965	0.00328193	0.00354706	0.00356809	0.00326992	0.0045144	0.00389652	0.00484061
8960.7	0.00334424	0.00367571	0.00328017	0.00346001	0.00344576	0.00381855	0.00365282	0.00346473	0.00468217	0.00399246	0.00500393
8960.99	0.00338628	0.00384816	0.00321679	0.00356963	0.00345753	0.00378907	0.00371466	0.00350486	0.00479079	0.00409731	0.00506592
8961.28	0.00359904	0.00378868	0.00345039	0.00369526	0.00349497	0.00390224	0.00386945	0.0036168	0.00498033	0.00425856	0.00520998
8961.58	0.00354145	0.00405083	0.00347845	0.00375331	0.00369528	0.00389273	0.0039409	0.00375578	0.0050765	0.00431247	0.00536181
8961.88	0.00389306	0.00409174	0.00369079	0.00387178	0.00375826	0.00407853	0.00400975	0.00383876	0.00521405	0.00442809	0.00555463
8962.18	0.00381692	0.00431913	0.00361655	0.00399385	0.00387606	0.00409143	0.00424096	0.00401252	0.00536147	0.00454367	0.00567618
8962.46	0.00397573	0.00436284	0.00385351	0.00402767	0.00392992	0.00423686	0.00429879	0.0040618	0.00553958	0.00470764	0.0058172
8962.75	0.00401498	0.00446313	0.00395893	0.00413048	0.00410298	0.00444682	0.00433569	0.00421223	0.00569971	0.00481129	0.00605106
8963.02	0.00417373	0.00461135	0.00401749	0.00419692	0.00417803	0.00453054	0.00444738	0.00420116	0.00585299	0.00492042	0.00617247
8963.3	0.00428153	0.00467581	0.00411781	0.00438083	0.00429018	0.00473686	0.00450656	0.00449017	0.00602518	0.00505312	0.00633831
8963.58	0.00436994	0.0048036	0.0042284	0.00452829	0.00437148	0.00464545	0.00468627	0.00454732	0.00618286	0.00516423	0.00651609
8963.87	0.00461424	0.00488002	0.00441232	0.00473599	0.00447926	0.00496146	0.00486512	0.0047695	0.00639571	0.0053216	0.00678739
8964.17	0.00452781	0.00523051	0.00451318	0.00473549	0.00462983	0.00496567	0.00497331	0.00483157	0.00657712	0.00544799	0.00693003
8964.47	0.00480098	0.00519195	0.00472735	0.00500769	0.00475468	0.00517095	0.00514757	0.00488401	0.00680572	0.00562449	0.00719677
8964.75	0.00477293	0.0054804	0.00475398	0.00505903	0.00495297	0.00520722	0.00525971	0.00509173	0.00698618	0.00577258	0.00739537
8965.04	0.00506644	0.0054814	0.00497292	0.00519275	0.00504368	0.00529434	0.00540824	0.00526817	0.00717534	0.00598732	0.00761996
8965.33	0.00516876	0.00564178	0.00508314	0.00534416	0.00523296	0.0055912	0.00556575	0.00537155	0.00746103	0.00610118	0.00783278
8965.62	0.00525007	0.00570186	0.00520606	0.00551683	0.00538651	0.0056871	0.00552467	0.0054556	0.0076744	0.00625122	0.0080482
8965.91	0.00538919	0.00596841	0.00532302	0.00569929	0.00545507	0.00592587	0.00577952	0.00571984	0.00794335	0.00646107	0.00835424
8966.21	0.00565295	0.00613917	0.00542243	0.00580243	0.00563923	0.00593864	0.00594108	0.00585388	0.00818248	0.00666987	0.00850866
8966.5	0.00583487	0.00618866	0.00570372	0.00601546	0.00582371	0.00623348	0.00620894	0.00612204	0.00845764	0.00682483	0.00882535
8966.79	0.00592	0.00650938	0.00575015	0.00616783	0.00598274	0.00624102	0.00625226	0.00613874	0.00875187	0.00696256	0.0090888
8967.07	0.00622093	0.00649677	0.00605288	0.00630316	0.00610089	0.00658477	0.00654397	0.00636321	0.00908187	0.00713574	0.00933868
8967.36	0.00622703	0.00691139	0.00615409	0.00647411	0.00627526	0.00675423	0.00664074	0.00646034	0.00938343	0.0073186	0.00966809
8967.63	0.00656579	0.00693064	0.00639854	0.00670824	0.0065034	0.00690796	0.00679771	0.00664501	0.00969616	0.0075865	0.00995661
8967.91	0.00660821	0.00718902	0.00660269	0.0069159	0.00666948	0.00704392	0.00704653	0.00687494	0.0100078	0.00782416	0.0102894
8968.2	0.00688862	0.00729637	0.00677731	0.00708079	0.00686132	0.00729437	0.00723955	0.00701224	0.010381	0.00813704	0.0106181
8968.51	0.00703304	0.00749904	0.00689024	0.00724621	0.00708647	0.00753596	0.00749465	0.0072536	0.0108156	0.00839168	0.0109911
8968.81	0.00732298	0.00771418	0.00709251	0.00748522	0.00732212	0.00769647	0.00764448	0.00739133	0.0112061	0.00861091	0.0113787
8969.12	0.00756202	0.00791384	0.00741175	0.00785815	0.00756225	0.00797332	0.00789762	0.00784269	0.0116397	0.00881573	0.0118419
8969.4	0.00784662	0.00834406	0.00752507	0.0079643	0.00773411	0.00804577	0.00800528	0.0080588	0.0120589	0.00914702	0.0122731
8969.68	0.00822747	0.0084236	0.00789567	0.00823753	0.00800328	0.00841353	0.00847665	0.008314	0.0125614	0.00945965	0.0127221
8969.96	0.00829987	0.00879794	0.0080491	0.00840698	0.00832055	0.00848612	0.00866333	0.00845152	0.0130689	0.00972792	0.0131838
8970.24	0.00864668	0.00896606	0.00844689	0.00869954	0.00848372	0.00888291	0.00892677	0.00875838	0.0136153	0.0100435	0.0136844
8970.52	0.00881455	0.00926454	0.008603	0.00899193	0.00878138	0.00902165	0.00912074	0.00907499	0.0142269	0.0103119	0.0142412
8970.82	0.0092578	0.00951628	0.00897599	0.0092743	0.00902485	0.00936483	0.00952872	0.00935422	0.0148927	0.0106442	0.0148213
8971.11	0.00946268	0.00987698	0.00919843	0.00957922	0.00937432	0.00970411	0.00980233	0.00968656	0.0155626	0.0110291	0.0154245
8971.4	0.00983466	0.01016	0.00950777	0.00988852	0.00964921	0.0099981	0.0101082	0.00994845	0.0162623	0.0114213	0.015973
8971.68	0.0101148	0.0104878	0.00988209	0.0102345	0.00994028	0.0102657	0.0104965	0.0103113	0.0170543	0.0118109	0.0166986
8971.97	0.0103979	0.0107972	0.0101777	0.0105529	0.0103017	0.0105258	0.0108647	0.0106989	0.0179101	0.0122311	0.0174827
8972.24	0.0107877	0.0111185	0.0106228	0.0110113	0.0106599	0.0111025	0.0112527	0.0111233	0.0188756	0.012648	0.0183192
8972.54	0.0111726	0.0116755	0.0109882	0.0112927	0.0111279	0.011357	0.0115713	0.0115264	0.0198811	0.0131065	0.0191118
8972.84	0.0116261	0.0119594	0.0115762	0.0118268	0.0115379	0.0119371	0.0120793	0.0120109	0.0210763	0.0137401	0.0201723
8973.14	0.0119852	0.0125314	0.0119105	0.0122014	0.0120444	0.0123308	0.0125254	0.0124525	0.0223283	0.0143181	0.0211224
8973.43	0.0125749	0.0128879	0.0124653	0.0127963	0.0124101	0.0128277	0.0131509	0.013021	0.0237766	0.0148926	0.0221842
8973.73	0.0131367	0.0135636	0.0129406	0.0133929	0.013107	0.0133798	0.0136195	0.0135425	0.0252585	0.0154885	0.0233999
8974.02	0.013807	0.0141056	0.0135294	0.0139839	0.0136089	0.0140119	0.0143188	0.0141548	0.0269837	0.0161696	0.0245969
8974.31	0.0143943	0.0147789	0.0142052	0.0145928	0.0143132	0.0146092	0.0150371	0.0149961	0.028941	0.0169022	0.0260758
8974.59	0.0152314	0.0156127	0.0150756	0.0153501	0.0151604	0.0154869	0.0158338	0.0157085	0.0312231	0.0177345	0.0277247
8974.88	0.0162938	0.0165602	0.0161092	0.0164147	0.0161192	0.0164543	0.0168226	0.0167532	0.033894	0.018725	0.0296998
8975.16	0.0174479	0.0177995	0.0171208	0.0176264	0.0171641	0.0175428	0.0179143	0.0179162	0.0368702	0.0198359	0.0317556
8975.46	0.019075	0.0192208	0.0187745	0.0191136	0.0185123	0.0189672	0.0195806	0.0194616	0.0406114	0.0212487	0.0341035
8975.76	0.0206926	0.0210298	0.0202757	0.0207198	0.0201294	0.0206072	0.0211638	0.021262	0.0450549	0.0228979	0.0368429
8976.06	0.0227096	0.0228128	0.0222246	0.0226941	0.0219905	0.0226125	0.023236	0.0232347	0.0507237	0.0248246	0.0401177
8976.34	0.024553	0.0246904	0.0239617	0.0245412	0.0238905	0.0244416	0.0251351	0.025131	0.0575773	0.0269258	0.0436857
8976.63	0.0263608	0.0263812	0.0258451	0.0263609	0.0256929	0.0262244	0.0272181	0.0269917	0.0670594	0.0292797	0.0479327
8976.91	0.0276442	0.0277787	0.0272122	0.0276136	0.0273194	0.0277141	0.0286975	0.0286359	0.0790866	0.0314562	0.0529604
8977.19	0.0287823	0.0288325	0.0283822	0.0286678	0.0284502	0.0287354	0.0298536	0.0297311	0.095697	0.0336023	0.059167
8977.48	0.0293626	0.0295021	0.0290769	0.029375	0.0293532	0.0296228	0.0306991	0.0306075	0.117124	0.0355674	0.0670235
8977.77	0.0299018	0.0298197	0.0293953	0.0296565	0.029763	0.0298251	0.0310616	0.0308891	0.14387	0.0372869	0.0762515
8978.07	0.0303351	0.0299467	0.0297723	0.0299391	0.0299903	0.0301766	0.0313816	0.0311419	0.176809	0.0389303	0.0890447
8978.36	0.0306693	0.0301988	0.0299418	0.0301284	0.0303341	0.0303407	0.0315136	0.0313196	0.213998	0.0405486	0.104927
8978.64	0.0314701	0.0305884	0.0305779	0.0305747	0.030813	0.0309268	0.0319785	0.031716	0.254723	0.0424017	0.126538
8978.92	0.0326154	0.0313701	0.0312303	0.0313226	0.0315816	0.0317185	0.032789	0.0324583	0.297306	0.0448403	0.154156
8979.2	0.0344042	0.0325566	0.0325707	0.032587	0.0327178	0.0330897	0.0340708	0.0337871	0.34161	0.0481807	0.191795
8979.49	0.0366694	0.0342677	0.0341637	0.0341549	0.0344394	0.0346276	0.0357232	0.0355081	0.381409	0.0522516	0.235493
8979.79	0.0395134	0.0362607	0.0362331	0.0361713	0.0364905	0.0366646	0.0380068	0.0376471	0.414822	0.05738	0.287776
8980.08	0.0426418	0.0385778	0.0386325	0.0384409	0.0390202	0.0390738	0.0407032	0.0402912	0.438938	0.0633199	0.34449
8980.38	0.0462715	0.041145	0.041271	0.0410325	0.0417576	0.0416296	0.0436962	0.0431588	0.454388	0.0701248	0.397344
8980.68	0.0501471	0.0441411	0.0444201	0.0439429	0.0450798	0.0448297	0.0473251	0.046797	0.46338	0.0781908	0.448703
8980.97	0.0544604	0.0476257	0.0479304	0.047445	0.0487261	0.0484019	0.0513282	0.0507356	0.466655	0.0875789	0.484464
8981.25	0.0593018	0.0517064	0.0523215	0.0518465	0.0531042	0.0525891	0.0561014	0.0555242	0.466388	0.0985242	0.507099
8981.54	0.0645341	0.0567961	0.0573604	0.0569002	0.0582998	0.0579125	0.0617389	0.0608742	0.463824	0.112138	0.513065
8981.82	0.0709063	0.062803	0.0640035	0.0633997	0.0647056	0.0642885	0.0688851	0.0677828	0.460205	0.129572	0.505559
8982.11	0.0781449	0.0703991	0.0715518	0.0708712	0.0725359	0.0720254	0.0770133	0.0758051	0.456893	0.150011	0.49096
8982.4	0.0874504	0.0795672	0.0813747	0.0805541	0.0818495	0.0816709	0.0873507	0.0856835	0.454716	0.174713	0.473759
8982.7	0.0983863	0.0908732	0.0931464	0.0917294	0.0940748	0.0934633	0.100177	0.0978997	0.454625	0.203234	0.458414
8983	0.112225	0.105462	0.108224	0.106117	0.109089	0.108644	0.116688	0.113351	0.457107	0.236537	0.446659
8983.29	0.12844	0.122122	0.125678	0.122562	0.127287	0.126434	0.135265	0.131502	0.461952	0.270345	0.441255
8983.57	0.148577	0.142301	0.146621	0.142488	0.14947	0.14809	0.158948	0.153284	0.469332	0.305958	0.441513
8983.85	0.171539	0.165676	0.171696	0.166034	0.17604	0.173423	0.185576	0.180067	0.478723	0.339555	0.44736
8984.14	0.197916	0.192008	0.199362	0.191889	0.205734	0.202022	0.215383	0.207819	0.489037	0.370043	0.457532
8984.43	0.227225	0.222677	0.230991	0.221353	0.238524	0.232943	0.248587	0.241046	0.500393	0.396269	0.472221
8984.73	0.257458	0.253358	0.262835	0.252331	0.271739	0.265836	0.282159	0.274716	0.511364	0.416572	0.488448
8985.03	0.289894	0.28573	0.297334	0.284888	0.305142	0.300094	0.317512	0.309479	0.522544	0.431064	0.506458
8985.32	0.32116	0.317838	0.329122	0.316161	0.338388	0.333208	0.349601	0.343611	0.533499	0.439968	0.524647
8985.6	0.352458	0.349545	0.360905	0.347893	0.368924	0.366133	0.381298	0.376004	0.544681	0.445167	0.543066
8985.89	0.380716	0.378998	0.389543	0.377178	0.39893	0.395864	0.409079	0.406991	0.556725	0.448028	0.561315
8986.17	0.408518	0.407157	0.414871	0.404022	0.424324	0.423109	0.43492	0.433562	0.569115	0.450395	0.578757
8986.46	0.433541	0.432888	0.437936	0.428963	0.447585	0.446914	0.456721	0.458447	0.582339	0.453886	0.596581
8986.75	0.457515	0.456794	0.458734	0.453033	0.468446	0.46905	0.476806	0.479871	0.596638	0.459834	0.613267
8987.05	0.480648	0.480224	0.479888	0.477591	0.488617	0.490479	0.496411	0.501215	0.613154	0.469686	0.631367
8987.34	0.503336	0.502524	0.499859	0.500089	0.507332	0.510686	0.514533	0.520438	0.629501	0.483201	0.648372
8987.64	0.526885	0.525237	0.521866	0.524039	0.526772	0.531301	0.533527	0.539876	0.647135	0.500548	0.666029
8987.93	0.550215	0.548397	0.54419	0.548368	0.547501	0.552746	0.553204	0.560326	0.666232	0.52217	0.682709
8988.21	0.575818	0.571913	0.56882	0.573922	0.56881	0.575213	0.574536	0.581416	0.687162	0.547184	0.70015
8988.49	0.601469	0.59745	0.593914	0.600489	0.592182	0.599844	0.597397	0.604238	0.708284	0.574256	0.717982
8988.78	0.630039	0.625058	0.622361	0.629505	0.617089	0.627109	0.623599	0.629255	0.731255	0.605097	0.736675
8989.07	0.659285	0.65532	0.652813	0.660357	0.645409	0.655851	0.651424	0.657495	0.755296	0.63904	0.757438
8989.37	0.691513	0.687544	0.684417	0.693054	0.675654	0.688148	0.682052	0.686444	0.779818	0.675667	0.778357
8989.68	0.724618	0.723111	0.719287	0.727505	0.710256	0.722438	0.715806	0.720323	0.805282	0.714434	0.802317
8989.98	0.759941	0.7583	0.754296	0.762392	0.746097	0.758797	0.750332	0.754586	0.82956	0.754403	0.826683
8990.26	0.797283	0.796052	0.790684	0.799323	0.78421	0.796535	0.787403	0.790609	0.853231	0.794068	0.853919
8990.55	0.834895	0.836595	0.82724	0.836497	0.823804	0.835774	0.825452	0.827558	0.87588	0.835212	0.882544
8990.82	0.875126	0.877179	0.866814	0.876098	0.863749	0.87659	0.865895	0.865972	0.89812	0.875257	0.912703
8991.11	0.91331	0.917173	0.904785	0.914119	0.904392	0.915566	0.904699	0.905418	0.91867	0.913181	0.942565
8991.4	0.953353	0.955408	0.943532	0.953383	0.94128	0.954375	0.942129	0.943439	0.937527	0.947813	0.971275
8991.69	0.9905	0.992976	0.981491	0.991298	0.978717	0.990905	0.978101	0.98068	0.954955	0.979416	0.999145
8991.99	1.02853	1.0285	1.0169	1.02772	1.01188	1.02617	1.01265	1.01533	0.969073	1.00659	1.02293
8992.29	1.06347	1.06384	1.05217	1.06218	1.04532	1.06106	1.04509	1.05053	0.981176	1.03089	1.04609
8992.57	1.09706	1.09588	1.08294	1.0951	1.07534	1.09361	1.07549	1.08045	0.990094	1.05216	1.06505
8992.84	1.12882	1.12618	1.11249	1.12544	1.1033	1.12303	1.10258	1.10876	0.995961	1.0707	1.081
8993.12	1.15795	1.1548	1.13891	1.15275	1.12851	1.15034	1.12722	1.13355	0.998877	1.08782	1.0939
8993.41	1.18566	1.18197	1.16563	1.18049	1.1545	1.17746	1.15183	1.15802	0.999169	1.10543	1.10588
8993.71	1.21015	1.20814	1.19028	1.20478	1.17876	1.2022	1.17485	1.18076	0.996752	1.12261	1.11621
8994.01	1.23431	1.23169	1.21364	1.22815	1.20052	1.2256	1.19687	1.20112	0.992059	1.14024	1.12485
8994.31	1.25493	1.2536	1.23487	1.24915	1.22213	1.24592	1.21645	1.2203	0.985791	1.15796	1.13261
8994.61	1.2748	1.27314	1.2548	1.26859	1.2416	1.26554	1.23529	1.23756	0.978424	1.17651	1.13898
8994.91	1.2919	1.29072	1.27328	1.28625	1.26072	1.28323	1.25296	1.25465	0.970488	1.19528	1.1438
8995.19	1.30715	1.30581	1.28926	1.30161	1.27715	1.29875	1.26826	1.26851	0.96244	1.21365	1.14638
8995.48	1.32024	1.31946	1.30515	1.3158	1.29273	1.31312	1.28246	1.28163	0.954094	1.23246	1.14684
8995.76	1.33091	1.33107	1.31716	1.32704	1.30623	1.32514	1.29465	1.29251	0.945994	1.25083	1.14474
8996.05	1.33947	1.34004	1.32759	1.33639	1.31803	1.33503	1.30484	1.30231	0.938358	1.26699	1.14032
8996.36	1.34512	1.34756	1.33518	1.34307	1.32775	1.34296	1.31357	1.30994	0.931268	1.28058	1.13358
8996.66	1.34887	1.35213	1.34066	1.34736	1.33447	1.34787	1.31979	1.31546	0.925395	1.29018	1.12482
8996.96	1.34992	1.35417	1.34331	1.34909	1.3388	1.35089	1.32401	1.31877	0.920169	1.29543	1.11429
8997.25	1.3486	1.35346	1.3431	1.34808	1.33994	1.35054	1.32532	1.31966	0.916375	1.29656	1.10319
8997.54	1.34517	1.34992	1.34086	1.34504	1.33812	1.34847	1.3245	1.3188	0.913793	1.29411	1.09105
8997.82	1.33937	1.34459	1.33583	1.33942	1.33362	1.34325	1.32113	1.31526	0.912756	1.28896	1.07929
8998.1	1.33197	1.33653	1.32877	1.33209	1.32618	1.33668	1.3157	1.31016	0.913353	1.28177	1.06692
8998.39	1.32241	1.32822	1.31956	1.3227	1.31717	1.32779	1.30873	1.30294	0.915291	1.27328	1.05578
8998.68	1.31186	1.31706	1.30883	1.31212	1.3061	1.31752	1.29999	1.29443	0.919138	1.26394	1.04455
8998.97	1.29973	1.30572	1.29641	1.30027	1.29381	1.30571	1.29038	1.28461	0.924151	1.25402	1.03421
8999.27	1.28655	1.29197	1.28276	1.2867	1.28035	1.29186	1.27829	1.27297	0.931136	1.24286	1.02393
8999.54	1.27246	1.27875	1.2689	1.27324	1.26624	1.27853	1.26701	1.26147	0.938576	1.23129	1.01501
8999.81	1.25756	1.26434	1.25406	1.2588	1.25174	1.26357	1.25394	1.24896	0.947536	1.21833	1.00618
9000.1	1.24267	1.24829	1.23865	1.24391	1.23602	1.24799	1.2401	1.2352	0.957755	1.20346	0.997247
9000.39	1.22671	1.23258	1.22274	1.22765	1.22036	1.23105	1.22558	1.22098	0.968496	1.18674	0.989294
9000.69	1.21154	1.21567	1.20683	1.21189	1.20393	1.21496	1.21074	1.20669	0.979543	1.16934	0.981773
9000.99	1.1954	1.20017	1.19102	1.19571	1.18885	1.19854	1.1959	1.19241	0.989586	1.15144	0.975436
9001.29	1.17985	1.18375	1.1756	1.17998	1.17316	1.18339	1.18109	1.1778	0.998863	1.13337	0.969694
9001.59	1.16453	1.1691	1.16035	1.16508	1.1586	1.1684	1.16673	1.16407	1.00637	1.11585	0.965204
9001.89	1.14938	1.15312	1.14474	1.14961	1.14445	1.15283	1.15197	1.14996	1.01239	1.09905	0.961479
9002.18	1.13482	1.13956	1.13051	1.13534	1.13092	1.13924	1.13898	1.13673	1.01581	1.08385	0.958843
9002.46	1.12048	1.12514	1.11618	1.12111	1.11778	1.12482	1.12534	1.12334	1.01713	1.06926	0.956878
9002.75	1.10696	1.11124	1.10323	1.1079	1.10475	1.11168	1.11326	1.1108	1.01615	1.05591	0.955751
9003.03	1.09345	1.09853	1.09025	1.09483	1.09304	1.09814	1.10059	1.09846	1.01314	1.04394	0.955233
9003.33	1.08112	1.08586	1.07841	1.08308	1.08145	1.0865	1.08902	1.08704	1.00845	1.0333	0.955413
9003.64	1.06892	1.07429	1.06627	1.07082	1.07018	1.074	1.07743	1.0752	1.00221	1.02308	0.95603
9003.94	1.05761	1.06238	1.05545	1.05971	1.05922	1.06341	1.06635	1.06394	0.994967	1.01374	0.957129
9004.23	1.04667	1.05211	1.04492	1.04883	1.04897	1.05259	1.05564	1.05328	0.987073	1.00484	0.958458
9004.52	1.0369	1.0412	1.03493	1.03834	1.03897	1.0428	1.04528	1.04319	0.9786	0.996016	0.960286
9004.8	1.02741	1.03218	1.02565	1.02916	1.02985	1.03409	1.03638	1.03437	0.970441	0.987924	0.962002
9005.08	1.0189	1.02389	1.01752	1.02081	1.02182	1.02562	1.02794	1.02568	0.962672	0.980486	0.964008
9005.37	1.01096	1.01633	1.0099	1.01338	1.01391	1.01849	1.0205	1.01819	0.955245	0.973699	0.966194
9005.67	1.00378	1.0094	1.00269	1.00592	1.00685	1.01106	1.01329	1.01047	0.948313	0.966996	0.968285
9005.97	0.99738	1.00289	0.996588	0.99974	1.00045	1.00521	1.00697	1.00418	0.941997	0.961215	0.970672
9006.26	0.991515	0.997814	0.991126	0.994197	0.995055	0.999426	1.00125	0.998336	0.93631	0.956384	0.972867
9006.54	0.986655	0.992354	0.986447	0.98903	0.990039	0.994968	0.99643	0.99313	0.930927	0.952375	0.975656
9006.82	0.981994	0.988243	0.982211	0.9846	0.985924	0.990529	0.992135	0.988495	0.925705	0.94923	0.978361
9007.11	0.978301	0.9843	0.978898	0.980712	0.982306	0.986988	0.988256	0.984445	0.920734	0.946997	0.98162
9007.4	0.975239	0.981698	0.975875	0.977538	0.979341	0.984173	0.985153	0.981216	0.915742	0.945747	0.984823
9007.69	0.972579	0.978947	0.973825	0.974871	0.977044	0.981776	0.982389	0.978394	0.910925	0.945358	0.988363
9007.99	0.970419	0.977159	0.97198	0.972691	0.975284	0.980003	0.980228	0.975937	0.906116	0.945676	0.991917
9008.29	0.968747	0.975218	0.97067	0.970867	0.973915	0.978312	0.978386	0.973913	0.901271	0.946607	0.995501
9008.59	0.967154	0.973843	0.96967	0.969395	0.972914	0.977627	0.976883	0.972304	0.89672	0.948003	0.998765
9008.88	0.965848	0.972738	0.968847	0.967994	0.972157	0.976158	0.975629	0.970554	0.892592	0.949661	1.00148
9009.17	0.964821	0.971724	0.968305	0.967046	0.971566	0.975803	0.974503	0.969538	0.888827	0.951523	1.00389
9009.45	0.963788	0.971084	0.967556	0.965959	0.970915	0.974661	0.973388	0.968132	0.885551	0.953461	1.00571
9009.74	0.963015	0.969721	0.967127	0.965118	0.970441	0.9742	0.972403	0.96702	0.882816	0.955398	1.00709
9010.02	0.961768	0.96928	0.966193	0.964185	0.969853	0.973281	0.971501	0.965771	0.880541	0.95713	1.00771
9010.33	0.960829	0.96801	0.965725	0.963058	0.969234	0.97248	0.970476	0.964506	0.87899	0.958735	1.00791
9010.63	0.959617	0.967275	0.964709	0.961799	0.968412	0.971605	0.969422	0.963238	0.877979	0.95993	1.00748
9010.93	0.958523	0.965867	0.963966	0.960639	0.967493	0.970223	0.968117	0.961841	0.877623	0.960756	1.00658
9011.22	0.957097	0.964618	0.962605	0.959336	0.966469	0.969371	0.967061	0.960527	0.877631	0.961257	1.00541
9011.5	0.955672	0.963215	0.961305	0.957718	0.965286	0.967404	0.965409	0.958682	0.878166	0.961464	1.00394
9011.78	0.954189	0.961366	0.959914	0.956056	0.963834	0.966224	0.963903	0.957319	0.879011	0.961405	1.00246
9012.07	0.952288	0.959785	0.957896	0.954258	0.962257	0.964048	0.962174	0.955248	0.880067	0.960986	1.00088
9012.35	0.950563	0.957616	0.956207	0.952658	0.96036	0.962372	0.960346	0.953552	0.881444	0.960478	0.999438
9012.66	0.948445	0.956071	0.953898	0.950375	0.958351	0.959859	0.958255	0.951377	0.882852	0.959678	0.998112
9012.96	0.946464	0.953448	0.951954	0.94831	0.956229	0.957825	0.956196	0.949257	0.884669	0.958675	0.996983
9013.25	0.944184	0.951439	0.949466	0.946148	0.954001	0.955442	0.953951	0.947023	0.88643	0.957537	0.995935
9013.53	0.941832	0.948773	0.947048	0.943758	0.951629	0.95272	0.951505	0.944576	0.888464	0.956405	0.994761
9013.82	0.939191	0.946147	0.94441	0.941136	0.949061	0.95004	0.949035	0.94207	0.890689	0.955073	0.993581
9014.1	0.936621	0.943508	0.941698	0.938379	0.946289	0.946991	0.94627	0.939084	0.893127	0.953699	0.992216
9014.39	0.933978	0.940451	0.938972	0.935662	0.943352	0.944321	0.943703	0.936558	0.895955	0.952169	0.990482
9014.68	0.930974	0.937757	0.935887	0.932617	0.940604	0.940926	0.940697	0.933386	0.898867	0.950547	0.988285
9014.99	0.928185	0.934027	0.932877	0.92964	0.937335	0.938101	0.937605	0.930617	0.902218	0.948927	0.985529
9015.29	0.92502	0.931266	0.929371	0.926368	0.934034	0.934525	0.934405	0.92735	0.905499	0.947198	0.98239
9015.6	0.922061	0.927394	0.926049	0.923273	0.930452	0.931334	0.93084	0.924051	0.909377	0.945369	0.978582
9015.89	0.918575	0.92428	0.92255	0.919899	0.926879	0.92748	0.927534	0.920775	0.913177	0.943486	0.974471
9016.18	0.915402	0.920308	0.918991	0.916528	0.923122	0.923874	0.923813	0.917345	0.917536	0.941438	0.969929
9016.47	0.911841	0.916879	0.915228	0.912961	0.91929	0.920116	0.920141	0.914069	0.921797	0.93918	0.965
9016.76	0.908351	0.912972	0.91137	0.909207	0.915485	0.915741	0.916171	0.910232	0.926349	0.936599	0.959878
9017.05	0.904758	0.908954	0.907475	0.905947	0.911527	0.912288	0.91273	0.906851	0.930902	0.933876	0.954676
9017.35	0.901047	0.905219	0.90357	0.90221	0.907437	0.90772	0.908513	0.902837	0.935653	0.930717	0.94943
9017.65	0.897358	0.90092	0.899643	0.89844	0.903321	0.90414	0.904658	0.89919	0.940433	0.927307	0.944426
9017.94	0.893548	0.897128	0.895553	0.894434	0.899215	0.899766	0.900775	0.895406	0.944936	0.923634	0.93964
9018.24	0.889943	0.892649	0.891603	0.890402	0.894831	0.895727	0.896749	0.891576	0.949745	0.919502	0.934916
9018.52	0.885923	0.888883	0.887434	0.886478	0.890564	0.891455	0.892746	0.887757	0.954155	0.915071	0.930583
9018.79	0.882244	0.88457	0.883432	0.882749	0.886273	0.887367	0.888812	0.884001	0.958825	0.910535	0.926605
9019.08	0.878357	0.880751	0.879035	0.878912	0.881906	0.883418	0.884841	0.880156	0.963099	0.905583	0.922924
9019.37	0.874633	0.876521	0.87491	0.875145	0.877639	0.879012	0.880797	0.87631	0.967714	0.900399	0.919777
9019.67	0.871038	0.872884	0.870934	0.871621	0.873627	0.875402	0.877178	0.872963	0.971756	0.895175	0.916822
9019.97	0.86739	0.869041	0.866892	0.867782	0.869648	0.870918	0.87293	0.869223	0.976054	0.889746	0.914195
9020.26	0.864045	0.86529	0.863258	0.864418	0.86559	0.867562	0.869501	0.865966	0.980273	0.884479	0.911698
9020.54	0.860523	0.861874	0.859476	0.860948	0.86206	0.863587	0.865907	0.862554	0.98422	0.879304	0.909507
9020.82	0.857386	0.85818	0.856047	0.85789	0.85841	0.860619	0.862522	0.859615	0.988383	0.874043	0.907365
9021.1	0.854069	0.855235	0.852486	0.854662	0.854927	0.856902	0.859256	0.856487	0.992296	0.868849	0.905275
9021.39	0.85129	0.851804	0.84946	0.851876	0.851509	0.853928	0.85613	0.853576	0.996392	0.864041	0.903324
9021.69	0.848277	0.849195	0.846056	0.849025	0.848369	0.851086	0.853196	0.85077	1.00003	0.859484	0.901481
9021.99	0.845795	0.846392	0.843196	0.846127	0.845272	0.848243	0.850163	0.848129	1.00399	0.855047	0.899595
9022.29	0.843261	0.844013	0.840229	0.843694	0.842313	0.845864	0.847559	0.845673	1.00764	0.851028	0.897791
9022.59	0.840897	0.841463	0.83783	0.841131	0.8397	0.84321	0.844987	0.843319	1.01117	0.847206	0.896065
9022.89	0.838751	0.839207	0.835521	0.839042	0.837239	0.841146	0.842918	0.841421	1.01453	0.8438	0.894512
9023.19	0.836667	0.837421	0.833246	0.836984	0.835113	0.838677	0.840791	0.839278	1.01769	0.840676	0.8931
9023.47	0.835028	0.835436	0.831528	0.835573	0.833062	0.837134	0.839092	0.837965	1.02054	0.837883	0.891905
9023.77	0.833425	0.834266	0.82957	0.833983	0.831342	0.835211	0.837486	0.836198	1.02306	0.835193	0.89084
9024.06	0.832338	0.832757	0.828358	0.832974	0.829895	0.833989	0.836076	0.835208	1.02535	0.832854	0.889753
9024.37	0.831263	0.832172	0.826899	0.831986	0.828627	0.832951	0.834908	0.834122	1.02665	0.830713	0.888898
9024.66	0.830572	0.831314	0.826345	0.831275	0.827663	0.832094	0.833928	0.833425	1.02774	0.828967	0.888172
9024.96	0.829976	0.831174	0.825412	0.830784	0.826917	0.831756	0.83324	0.832937	1.02811	0.827317	0.887605
9025.25	0.829733	0.83068	0.825183	0.830452	0.826459	0.831236	0.832728	0.832505	1.02807	0.825867	0.887028
9025.53	0.829666	0.830873	0.824808	0.830423	0.826221	0.831422	0.832573	0.832496	1.0273	0.824641	0.886669
9025.81	0.829808	0.831222	0.824773	0.830506	0.826238	0.831294	0.832438	0.832369	1.02599	0.823612	0.886223
9026.1	0.829945	0.831609	0.825218	0.83088	0.82645	0.831927	0.83275	0.832852	1.02416	0.822968	0.886061
9026.39	0.830708	0.8324	0.825542	0.831461	0.826867	0.832145	0.833123	0.833066	1.02188	0.822616	0.885881
9026.7	0.831654	0.833165	0.826448	0.832458	0.827627	0.833273	0.833657	0.834086	1.01912	0.822546	0.885891
9027	0.832546	0.834689	0.827126	0.833402	0.828533	0.834185	0.83449	0.834773	1.01587	0.822864	0.88585
9027.29	0.833945	0.835742	0.828546	0.834659	0.829655	0.835697	0.835501	0.835901	1.01252	0.823538	0.885975
9027.57	0.83527	0.837492	0.829546	0.836088	0.830898	0.836923	0.836615	0.836987	1.00878	0.824444	0.886068
9027.85	0.836853	0.839044	0.831288	0.83765	0.832306	0.838466	0.837668	0.838266	1.00489	0.825746	0.886257
9028.13	0.838307	0.840968	0.832823	0.839235	0.83388	0.840259	0.839047	0.839876	1.00081	0.827294	0.886599
9028.42	0.840435	0.842874	0.834734	0.841228	0.835537	0.841871	0.840571	0.841456	0.996544	0.829202	0.887032
9028.71	0.84239	0.845014	0.836684	0.843371	0.837444	0.844097	0.84245	0.84326	0.992151	0.831426	0.887572
9029.01	0.844582	0.847234	0.838662	0.845513	0.839409	0.845917	0.844274	0.84505	0.987719	0.833976	0.888084
9029.3	0.846851	0.849232	0.84104	0.847948	0.841548	0.84829	0.846165	0.84726	0.983365	0.836695	0.888872
9029.61	0.849159	0.851856	0.843304	0.850327	0.843757	0.850558	0.84824	0.849302	0.978805	0.839745	0.889714
9029.91	0.851803	0.854164	0.846059	0.853013	0.84609	0.853126	0.850436	0.851814	0.974217	0.843068	0.890827
9030.22	0.854269	0.857213	0.848471	0.85557	0.848375	0.855706	0.852811	0.854121	0.969547	0.846561	0.89187
9030.5	0.857167	0.859585	0.851624	0.858444	0.850825	0.8583	0.855122	0.856951	0.965322	0.850187	0.893159
9030.8	0.859853	0.862476	0.854237	0.861339	0.853477	0.861231	0.857622	0.859583	0.961098	0.854079	0.894584
9031.09	0.862954	0.86528	0.857313	0.864086	0.856042	0.863912	0.859927	0.862106	0.957314	0.858018	0.896186
9031.39	0.865943	0.868453	0.860225	0.867098	0.858734	0.866991	0.862608	0.865184	0.953503	0.862027	0.898045
9031.69	0.86907	0.871495	0.863185	0.870182	0.861509	0.869678	0.865357	0.867864	0.950037	0.866063	0.899913
9031.99	0.872174	0.87443	0.866512	0.8732	0.864411	0.873011	0.868108	0.870949	0.946951	0.870139	0.901878
9032.27	0.87539	0.877685	0.869611	0.876388	0.867386	0.875929	0.871034	0.873645	0.944028	0.874264	0.903939
9032.56	0.878785	0.880704	0.873052	0.879651	0.870361	0.879057	0.873883	0.877009	0.941329	0.878423	0.906257
9032.83	0.882083	0.884136	0.876015	0.882828	0.873329	0.882182	0.876916	0.879841	0.938914	0.882527	0.908468
9033.12	0.88565	0.887303	0.879793	0.886422	0.876525	0.885611	0.880095	0.883233	0.93677	0.886941	0.910922
9033.41	0.889015	0.890926	0.883	0.890013	0.879857	0.889113	0.883156	0.886653	0.934766	0.891271	0.913371
9033.72	0.892686	0.894394	0.886909	0.893634	0.88325	0.892416	0.886691	0.890229	0.933099	0.895812	0.915842
9034.01	0.896122	0.897917	0.890254	0.897101	0.886742	0.896034	0.890091	0.89363	0.931596	0.900161	0.918328
9034.31	0.899981	0.901447	0.894051	0.900716	0.890181	0.899342	0.893386	0.897086	0.930386	0.904599	0.920807
9034.59	0.903663	0.905073	0.897903	0.904437	0.89377	0.903281	0.897088	0.900869	0.929369	0.908981	0.923166
9034.88	0.907426	0.908966	0.90166	0.908184	0.897449	0.906736	0.900484	0.904249	0.928471	0.913519	0.925548
9035.17	0.911105	0.912611	0.905854	0.911966	0.901473	0.910792	0.904301	0.908254	0.927891	0.918041	0.928015
9035.45	0.914892	0.916596	0.909294	0.915663	0.905095	0.914146	0.907916	0.91164	0.927442	0.922408	0.93017
9035.75	0.918841	0.920211	0.913562	0.919619	0.908878	0.917975	0.91161	0.915649	0.927311	0.926956	0.93259
9036.06	0.922568	0.924357	0.917344	0.92361	0.912955	0.92202	0.915663	0.919428	0.927127	0.93172	0.934875
9036.36	0.926608	0.928092	0.921686	0.92766	0.916886	0.92595	0.919573	0.923487	0.927321	0.936303	0.937246
9036.66	0.930272	0.932205	0.925473	0.931699	0.920843	0.929899	0.92334	0.927385	0.927624	0.940803	0.939464
9036.97	0.934318	0.935929	0.929732	0.935733	0.92487	0.933603	0.92728	0.931328	0.928163	0.945523	0.941853
9037.26	0.938074	0.939811	0.93383	0.939647	0.928983	0.93782	0.931439	0.935512	0.928831	0.950255	0.944136
9037.55	0.942075	0.943729	0.937743	0.94367	0.932937	0.94154	0.935512	0.939112	0.92971	0.954938	0.946223
9037.84	0.945902	0.947482	0.942094	0.947677	0.93707	0.945849	0.939401	0.94359	0.930747	0.959509	0.948694
9038.13	0.94961	0.951515	0.945727	0.95136	0.94111	0.949536	0.943281	0.947056	0.931751	0.963893	0.950657
9038.42	0.95349	0.955174	0.949937	0.95532	0.945095	0.953607	0.947114	0.951046	0.93302	0.968225	0.953032
9038.73	0.95716	0.959228	0.953442	0.959024	0.949082	0.957338	0.951337	0.95466	0.934234	0.972652	0.955156
9039.02	0.960967	0.962892	0.95773	0.962775	0.953182	0.961408	0.955118	0.95855	0.935666	0.977043	0.957463
9039.3	0.96454	0.966508	0.960916	0.966197	0.957061	0.964994	0.958822	0.962069	0.93681	0.981011	0.959535
9039.58	0.968439	0.970196	0.964985	0.970175	0.960926	0.968703	0.962594	0.965774	0.938222	0.98506	0.961872
9039.86	0.971853	0.97392	0.968574	0.973736	0.964983	0.972629	0.966509	0.969708	0.939526	0.989106	0.964222
9040.14	0.975447	0.977519	0.97232	0.977279	0.96883	0.976092	0.970384	0.972997	0.940774	0.993047	0.96657
9040.44	0.978765	0.981091	0.976139	0.98091	0.972771	0.979938	0.974358	0.976997	0.941994	0.99679	0.969138
9040.74	0.982286	0.9848	0.97941	0.984357	0.976562	0.983328	0.978221	0.980324	0.943024	1.00044	0.971462
9041.04	0.985594	0.988301	0.98331	0.987765	0.980424	0.987132	0.981762	0.98409	0.944078	1.0038	0.974011
9041.34	0.988921	0.991863	0.986297	0.990996	0.984172	0.990386	0.985459	0.987081	0.944742	1.00686	0.976397
9041.63	0.99206	0.99496	0.990089	0.994432	0.987843	0.993943	0.988971	0.990712	0.945431	1.00979	0.97908
9041.92	0.995093	0.998663	0.993047	0.997451	0.991387	0.997235	0.992647	0.99391	0.945764	1.01259	0.98154
9042.2	0.998146	1.00171	0.996432	1.00055	0.99482	1.00052	0.995915	0.99698	0.94609	1.01523	0.98397
9042.49	1.00094	1.00491	0.999146	1.00347	0.998217	1.00371	0.99915	0.999958	0.946074	1.01763	0.986455
9042.8	1.00406	1.00789	1.00224	1.00651	1.00157	1.00674	1.00244	1.00279	0.946043	1.02018	0.988957
9043.1	1.00677	1.01092	1.00502	1.00944	1.00474	1.00994	1.00549	1.00594	0.945856	1.02258	0.991311
9043.41	1.00952	1.01396	1.00787	1.01212	1.00782	1.01255	1.00854	1.00852	0.945539	1.02485	0.993599
9043.71	1.01209	1.01646	1.01078	1.01493	1.01087	1.01555	1.01151	1.01136	0.945267	1.02694	0.995903
9044.01	1.0146	1.01946	1.01316	1.01737	1.01368	1.01798	1.01418	1.01374	0.944975	1.02906	0.997797
9044.31	1.01696	1.02181	1.01602	1.01996	1.0165	1.02088	1.01704	1.01665	0.944791	1.03135	0.999761
9044.59	1.01912	1.02431	1.01806	1.02205	1.01901	1.02311	1.01968	1.01855	0.944469	1.03336	1.00137
9044.88	1.02149	1.02644	1.02061	1.02433	1.02154	1.02544	1.02194	1.0209	0.944491	1.03545	1.00303
9045.17	1.02352	1.02887	1.02252	1.02646	1.02388	1.02782	1.02441	1.0229	0.944446	1.03749	1.00429
9045.48	1.02561	1.0309	1.02487	1.02838	1.02607	1.03005	1.02665	1.02497	0.944754	1.03957	1.00542
9045.77	1.02744	1.03292	1.02662	1.03025	1.02834	1.03232	1.02866	1.02693	0.945179	1.04148	1.00639
9046.07	1.02932	1.03483	1.02836	1.03205	1.03034	1.0339	1.03052	1.02842	0.945728	1.04346	1.00706
9046.36	1.0309	1.03647	1.03008	1.03369	1.03228	1.03604	1.03248	1.03035	0.946441	1.04541	1.00766
9046.63	1.03258	1.03836	1.03154	1.03505	1.03395	1.03754	1.03404	1.03169	0.947289	1.04719	1.0079
9046.91	1.03408	1.03961	1.03342	1.03673	1.0357	1.03929	1.03581	1.0335	0.94845	1.04903	1.00798
9047.2	1.03532	1.04126	1.03447	1.03787	1.03711	1.0406	1.03735	1.03463	0.949562	1.05074	1.00795
9047.49	1.03692	1.04236	1.03614	1.03918	1.03858	1.04197	1.03859	1.03604	0.950962	1.0523	1.0078
9047.79	1.03798	1.04371	1.03717	1.04025	1.0398	1.04332	1.04006	1.0372	0.952298	1.05372	1.00736
9048.1	1.03922	1.04475	1.03858	1.04142	1.04103	1.0443	1.04122	1.03831	0.953937	1.05507	1.00664
9048.4	1.04016	1.0459	1.03938	1.04246	1.04214	1.04554	1.04232	1.0395	0.955382	1.05619	1.00598
9048.69	1.04121	1.04688	1.04041	1.04322	1.04302	1.04635	1.04308	1.04002	0.956928	1.05717	1.00516
9048.97	1.04196	1.04753	1.04124	1.04394	1.04388	1.0474	1.04421	1.04118	0.958283	1.05798	1.00433
9049.26	1.04275	1.04838	1.04191	1.04436	1.0445	1.04789	1.0449	1.04154	0.959649	1.05861	1.00337
9049.55	1.04343	1.04897	1.04281	1.0451	1.0451	1.04869	1.04558	1.04238	0.961	1.0591	1.00248
9049.84	1.04399	1.04955	1.04312	1.04548	1.0458	1.04905	1.04617	1.04276	0.962084	1.05936	1.0015
9050.15	1.04463	1.04964	1.04394	1.04584	1.04623	1.04986	1.04656	1.04342	0.963238	1.05951	1.00069
9050.44	1.04495	1.05043	1.04417	1.04621	1.04651	1.05012	1.04717	1.04371	0.964023	1.05941	0.999819
9050.75	1.04557	1.05051	1.04465	1.04662	1.0469	1.05053	1.04738	1.04416	0.964863	1.05921	0.998974
9051.05	1.04578	1.05094	1.04471	1.04684	1.04714	1.05086	1.04786	1.04452	0.965456	1.05881	0.998235
9051.35	1.04615	1.05102	1.04513	1.04697	1.04742	1.05082	1.04791	1.04456	0.965994	1.05813	0.997525
9051.64	1.04631	1.05116	1.04542	1.04726	1.04749	1.05142	1.04817	1.04508	0.96624	1.05731	0.997059
9051.93	1.04658	1.05128	1.04552	1.04715	1.04757	1.05107	1.04816	1.04492	0.966522	1.0565	0.996549
9052.23	1.04681	1.05124	1.04584	1.04718	1.04772	1.05166	1.04837	1.04527	0.966822	1.0556	0.996238
9052.53	1.04688	1.05149	1.04577	1.04709	1.04764	1.05125	1.04848	1.04506	0.966912	1.05443	0.995846
9052.84	1.04705	1.05131	1.04607	1.04722	1.04767	1.05151	1.04848	1.04535	0.967185	1.05322	0.995738
9053.13	1.04708	1.0515	1.04581	1.04702	1.0477	1.0513	1.0484	1.04522	0.967295	1.05196	0.995537
9053.42	1.04708	1.05114	1.04608	1.04714	1.04764	1.05139	1.04817	1.04515	0.967648	1.05058	0.995519
9053.7	1.0469	1.05117	1.04585	1.04695	1.04751	1.05131	1.04821	1.04509	0.967789	1.04915	0.995502
9053.99	1.04695	1.0509	1.04598	1.0467	1.04735	1.05098	1.04806	1.04501	0.968298	1.04774	0.995533
9054.27	1.04693	1.05083	1.0458	1.04655	1.04724	1.05114	1.04797	1.04508	0.968738	1.04628	0.99557
9054.57	1.04683	1.05042	1.04571	1.04635	1.04713	1.05055	1.04763	1.04471	0.969386	1.0448	0.995683
9054.87	1.04668	1.05011	1.04579	1.04623	1.04695	1.05071	1.0476	1.04472	0.970201	1.04338	0.995858
9055.17	1.0465	1.05003	1.04554	1.04604	1.0468	1.05019	1.04719	1.04429	0.971095	1.04191	0.996009
9055.48	1.04633	1.04951	1.04552	1.04581	1.04653	1.05017	1.04696	1.0443	0.972225	1.04038	0.996219
9055.76	1.04611	1.04953	1.04513	1.04558	1.04634	1.04971	1.04655	1.04376	0.973321	1.03896	0.996345
9056.05	1.04594	1.04889	1.04529	1.04532	1.04611	1.04954	1.04632	1.04366	0.974804	1.03756	0.99646
9056.33	1.0456	1.04871	1.04484	1.04507	1.04585	1.04913	1.04607	1.04338	0.976148	1.0362	0.996499
9056.62	1.04537	1.0481	1.04489	1.04476	1.04551	1.04875	1.04562	1.04311	0.9778	1.03491	0.996606
9056.92	1.04502	1.04784	1.04451	1.04435	1.0453	1.04862	1.04546	1.0429	0.97942	1.03356	0.996582
9057.22	1.04484	1.04742	1.04451	1.04394	1.04494	1.04795	1.04482	1.0424	0.981228	1.03216	0.996553
9057.51	1.04443	1.04704	1.04415	1.0436	1.04466	1.04782	1.04456	1.04225	0.983021	1.03085	0.996552
9057.82	1.04416	1.04658	1.0438	1.04324	1.04431	1.04707	1.04417	1.04179	0.984814	1.0295	0.996452
9058.11	1.04367	1.04601	1.04376	1.04298	1.04402	1.04695	1.04383	1.04167	0.986726	1.02822	0.996318
9058.41	1.04327	1.04574	1.04325	1.04241	1.04371	1.04641	1.04331	1.04098	0.98854	1.02682	0.996089
9058.7	1.043	1.04483	1.043	1.04213	1.04331	1.04606	1.04289	1.04073	0.990425	1.02542	0.995843
9059	1.04246	1.04462	1.04249	1.04157	1.043	1.04549	1.04248	1.04022	0.992111	1.02406	0.995518
9059.29	1.04203	1.04401	1.0424	1.04135	1.04256	1.04502	1.0419	1.03982	0.993988	1.02286	0.995338
9059.6	1.0415	1.0437	1.04188	1.04082	1.04217	1.04457	1.0414	1.03939	0.995369	1.0215	0.99496
9059.9	1.04118	1.04292	1.0417	1.04033	1.04165	1.04392	1.04087	1.03893	0.996989	1.02014	0.994575
9060.2	1.04049	1.04254	1.0412	1.03995	1.04131	1.04367	1.04063	1.03873	0.998321	1.01883	0.994274
9060.49	1.04013	1.04179	1.04076	1.03927	1.04078	1.04274	1.03994	1.03793	0.99972	1.01752	0.993834
9060.77	1.03961	1.04119	1.04043	1.03903	1.04049	1.04279	1.0395	1.03751	1.00109	1.01613	0.993543
9061.05	1.03899	1.04081	1.03984	1.03846	1.04006	1.04183	1.03898	1.03679	1.00221	1.01489	0.993151
9061.34	1.03858	1.04003	1.03948	1.03788	1.03949	1.0415	1.03857	1.03647	1.00345	1.01364	0.992867
9061.63	1.03783	1.03962	1.03859	1.03738	1.03896	1.0407	1.03809	1.03579	1.00452	1.01242	0.992601
9061.93	1.03752	1.03871	1.03833	1.03694	1.03841	1.04012	1.03746	1.0353	1.00578	1.0113	0.99231
9062.24	1.03665	1.03834	1.03761	1.03625	1.03795	1.03968	1.03699	1.03449	1.00671	1.01011	0.99221
9062.54	1.03606	1.03755	1.03724	1.03569	1.03735	1.03891	1.03631	1.03396	1.00794	1.00902	0.99202
9062.83	1.0353	1.03695	1.0365	1.03512	1.03679	1.03846	1.03579	1.03344	1.00898	1.00802	0.991996
9063.12	1.03464	1.03621	1.03603	1.0344	1.0361	1.03765	1.03498	1.0326	1.01009	1.00693	0.99189
9063.41	1.03389	1.03534	1.03544	1.03384	1.03553	1.03718	1.03453	1.03218	1.01113	1.006	0.991855
9063.7	1.03326	1.03475	1.03478	1.03316	1.03478	1.03619	1.03379	1.0312	1.01224	1.00503	0.991834
9064	1.03244	1.03378	1.034	1.03255	1.03413	1.0358	1.03311	1.03075	1.01349	1.00415	0.992036
9064.31	1.03169	1.03317	1.03307	1.03163	1.03331	1.03475	1.03247	1.02989	1.01454	1.00317	0.992172
9064.6	1.03083	1.03206	1.03254	1.03087	1.03255	1.03412	1.03162	1.02919	1.0158	1.00235	0.992404
9064.9	1.02995	1.03144	1.03143	1.02995	1.03175	1.03317	1.03111	1.02843	1.01693	1.0015	0.992532
9065.21	1.02918	1.03037	1.03095	1.02937	1.03091	1.03251	1.03018	1.02764	1.01844	1.00059	0.99297
9065.5	1.02816	1.02971	1.02986	1.02845	1.03016	1.03176	1.02939	1.02684	1.01971	0.999773	0.99327
9065.79	1.02738	1.02864	1.02907	1.02755	1.02931	1.03052	1.02838	1.02582	1.02119	0.999042	0.993551
9066.09	1.02633	1.02779	1.02826	1.02682	1.02838	1.02992	1.02765	1.02523	1.02268	0.998239	0.99391
9066.39	1.02554	1.02686	1.02718	1.02578	1.02744	1.02866	1.02668	1.02405	1.02431	0.997363	0.994224
9066.69	1.02453	1.02576	1.02633	1.02503	1.02654	1.02791	1.02604	1.02349	1.02587	0.996637	0.994781
9067	1.02349	1.02505	1.02529	1.02405	1.02564	1.02663	1.02509	1.02251	1.02741	0.995835	0.995006
9067.3	1.02276	1.02385	1.02456	1.02323	1.02472	1.02612	1.02431	1.0218	1.02928	0.995069	0.995602
9067.59	1.0217	1.02307	1.02328	1.02231	1.02372	1.02499	1.02343	1.02064	1.03079	0.99434	0.99598
9067.86	1.02071	1.02187	1.02251	1.02138	1.02275	1.02402	1.02249	1.01978	1.03264	0.993583	0.996579
9068.14	1.0196	1.02103	1.02118	1.0203	1.02183	1.02279	1.02173	1.01884	1.03414	0.992734	0.996996
9068.42	1.01872	1.01997	1.02027	1.01933	1.02069	1.02184	1.02056	1.01784	1.03588	0.991988	0.997453
9068.71	1.01755	1.01902	1.01911	1.01845	1.0198	1.02106	1.0197	1.01709	1.03735	0.991315	0.997942
9069.01	1.01639	1.01782	1.01799	1.01735	1.01873	1.01973	1.01866	1.01597	1.03901	0.99053	0.998426
9069.32	1.01536	1.01673	1.01687	1.0162	1.01766	1.01879	1.0178	1.01516	1.04059	0.989851	0.99907
9069.61	1.01426	1.0158	1.01552	1.01501	1.01662	1.01744	1.01668	1.01389	1.04192	0.989089	0.999605
9069.9	1.01314	1.01447	1.01462	1.01404	1.01545	1.01651	1.0156	1.01307	1.04326	0.988355	1.00011
9070.19	1.01187	1.01352	1.01323	1.01289	1.01426	1.01508	1.01455	1.01187	1.04429	0.987696	1.00056
9070.49	1.01092	1.01221	1.01204	1.01179	1.01323	1.01404	1.0135	1.01082	1.04534	0.98709	1.00114
9070.79	1.00964	1.0112	1.01056	1.01076	1.012	1.01261	1.01219	1.00972	1.0461	0.986403	1.0016
9071.09	1.00849	1.0099	1.00956	1.0095	1.01076	1.01148	1.01105	1.00844	1.0469	0.985759	1.00211
9071.4	1.00709	1.00895	1.00803	1.00834	1.00956	1.0103	1.01012	1.00752	1.04726	0.985084	1.00259
9071.7	1.00616	1.00767	1.00688	1.00716	1.00832	1.00899	1.00858	1.00614	1.04752	0.984465	1.003
9072	1.00483	1.00656	1.00557	1.00605	1.0072	1.00816	1.00772	1.00521	1.0475	0.983932	1.00335
9072.29	1.00349	1.00527	1.00419	1.00482	1.00588	1.00653	1.00641	1.00395	1.04733	0.983405	1.00375
9072.59	1.00244	1.00394	1.00302	1.00364	1.00474	1.00578	1.00535	1.00312	1.04709	0.982861	1.00427
9072.89	1.0012	1.00301	1.00147	1.00229	1.00344	1.00404	1.00402	1.00173	1.04646	0.982318	1.00458
9073.19	0.999991	1.00151	1.00028	1.00108	1.00204	1.00296	1.00287	1.0007	1.04578	0.981805	1.00505
9073.48	0.998729	1.00049	0.998723	0.999738	1.0007	1.00177	1.00164	0.999351	1.04462	0.981277	1.00535
9073.78	0.997519	0.998944	0.997678	0.99847	0.999456	1.00055	1.00042	0.998186	1.04368	0.98084	1.00569
9074.09	0.996224	0.998079	0.996229	0.997295	0.998148	0.999281	0.999235	0.997007	1.04233	0.980483	1.00597
9074.39	0.994949	0.996671	0.99505	0.995835	0.996839	0.99794	0.997962	0.995677	1.04102	0.98007	1.00624
9074.68	0.99356	0.995566	0.993631	0.994712	0.99551	0.996664	0.996811	0.994562	1.03945	0.979622	1.00663
9074.96	0.992437	0.994268	0.992322	0.993341	0.994182	0.995163	0.995401	0.993195	1.03773	0.979281	1.00688
9075.24	0.991205	0.992937	0.990982	0.992176	0.992843	0.994216	0.994169	0.992034	1.03598	0.978936	1.00724
9075.52	0.989747	0.991793	0.989463	0.990711	0.991636	0.992702	0.992887	0.990657	1.03392	0.978431	1.00745
9075.81	0.988554	0.990303	0.988212	0.989557	0.990253	0.991599	0.991718	0.989621	1.03182	0.978078	1.0078
9076.12	0.987205	0.989305	0.986774	0.988153	0.988852	0.990037	0.990382	0.988271	1.02955	0.977746	1.00789
9076.42	0.985909	0.987682	0.985504	0.98678	0.987433	0.988741	0.98906	0.986966	1.0273	0.977459	1.00812
9076.72	0.984541	0.986542	0.983944	0.985487	0.986083	0.987422	0.987778	0.98563	1.02488	0.977142	1.00825
9077.01	0.983458	0.985159	0.982811	0.984181	0.984743	0.985921	0.986411	0.984507	1.02257	0.976809	1.00861
9077.3	0.982101	0.984114	0.981341	0.982977	0.983406	0.984824	0.985221	0.983373	1.02015	0.976508	1.00873
9077.6	0.980886	0.98264	0.979894	0.981493	0.981957	0.983298	0.983626	0.981838	1.01759	0.976256	1.00876
9077.9	0.979674	0.98121	0.978666	0.980331	0.980567	0.982433	0.982437	0.980748	1.01506	0.97601	1.00899
9078.19	0.978452	0.98009	0.97724	0.978927	0.979281	0.980603	0.981015	0.979359	1.01264	0.975758	1.00906
9078.5	0.977223	0.978744	0.975974	0.977841	0.977944	0.979577	0.979923	0.978392	1.01025	0.975572	1.0092
9078.8	0.975909	0.977695	0.97453	0.976259	0.976633	0.978107	0.978521	0.976989	1.00783	0.975296	1.00938
9079.1	0.974851	0.976234	0.973513	0.975155	0.975327	0.976988	0.977241	0.975877	1.00562	0.975113	1.00948
9079.4	0.973422	0.975116	0.97214	0.973893	0.974024	0.975758	0.97614	0.974603	1.00321	0.975001	1.00956
9079.69	0.97255	0.973772	0.971151	0.972733	0.972721	0.974694	0.974752	0.973495	1.00113	0.97494	1.00955
9079.98	0.971137	0.972862	0.969766	0.971388	0.971408	0.973464	0.973791	0.972364	0.998833	0.974797	1.00972
9080.27	0.970198	0.971416	0.968828	0.970155	0.970147	0.972039	0.972219	0.971221	0.996871	0.974634	1.0097
9080.57	0.968992	0.970362	0.96766	0.969087	0.968903	0.971034	0.971282	0.970161	0.994819	0.974501	1.0099
9080.88	0.967864	0.969458	0.966403	0.967865	0.967717	0.969644	0.969985	0.968838	0.992791	0.974367	1.00983
9081.18	0.966746	0.968204	0.965295	0.966756	0.966501	0.96893	0.969028	0.968056	0.990855	0.974254	1.00994
9081.49	0.965606	0.967324	0.964027	0.965519	0.96542	0.967412	0.967968	0.966699	0.988858	0.974049	1.00994
9081.79	0.964681	0.965927	0.963305	0.964543	0.964261	0.96647	0.966972	0.965856	0.986987	0.973908	1.00993
9082.07	0.963539	0.965139	0.961972	0.963429	0.963044	0.965289	0.965803	0.964622	0.985155	0.973799	1.00979
9082.35	0.962752	0.963882	0.961222	0.962474	0.962025	0.96432	0.964721	0.963618	0.983432	0.973657	1.00982
9082.64	0.961671	0.963081	0.959955	0.961408	0.960923	0.963347	0.963746	0.962671	0.981529	0.973391	1.00963
9082.94	0.96091	0.961916	0.959092	0.960436	0.959895	0.962311	0.962614	0.961603	0.979747	0.973175	1.00951
9083.24	0.959916	0.961193	0.958153	0.959643	0.958858	0.96161	0.961861	0.960871	0.978004	0.972951	1.00933
9083.55	0.95902	0.960136	0.957295	0.958695	0.957956	0.960587	0.960606	0.959807	0.976349	0.972778	1.00908
9083.84	0.958187	0.959128	0.956553	0.958004	0.957027	0.959845	0.95986	0.959201	0.974757	0.972575	1.00894
9084.14	0.957319	0.958318	0.955744	0.956991	0.956155	0.95851	0.958942	0.958293	0.973211	0.972262	1.0086
9084.42	0.956648	0.957256	0.955149	0.956229	0.95522	0.958042	0.958179	0.957722	0.971836	0.972021	1.00833
9084.71	0.955666	0.956723	0.954198	0.955348	0.954414	0.956847	0.957246	0.956932	0.970445	0.971713	1.00787
9085.02	0.955271	0.955733	0.953604	0.954732	0.953631	0.9562	0.956221	0.956168	0.969158	0.971469	1.00744
9085.32	0.954433	0.95528	0.952746	0.953904	0.952865	0.955383	0.955511	0.955338	0.967985	0.971224	1.00688
9085.61	0.953824	0.954286	0.952318	0.953304	0.952078	0.954693	0.954847	0.954683	0.967076	0.970975	1.0063
9085.91	0.953121	0.953759	0.951599	0.952815	0.951391	0.954165	0.954266	0.954214	0.966142	0.970683	1.00575
9086.22	0.952609	0.953106	0.951034	0.95213	0.95076	0.953414	0.953431	0.95348	0.965472	0.970411	1.00514
9086.53	0.951935	0.95249	0.950481	0.951631	0.950147	0.953068	0.952939	0.953071	0.96471	0.97016	1.00449
9086.82	0.95168	0.952023	0.949839	0.951003	0.94951	0.952198	0.952358	0.952312	0.964165	0.969928	1.00374
9087.11	0.951071	0.951317	0.949411	0.950656	0.949027	0.951956	0.95182	0.952155	0.963665	0.969759	1.00298
9087.4	0.950486	0.95098	0.948815	0.950003	0.94851	0.951323	0.951356	0.951489	0.963117	0.969581	1.00217
9087.7	0.95028	0.950271	0.948603	0.949859	0.947982	0.951065	0.950866	0.951231	0.962665	0.96941	1.00129
9088.01	0.949771	0.950255	0.948051	0.949382	0.947629	0.950519	0.950548	0.950688	0.962076	0.96925	1.00035
9088.31	0.94957	0.949601	0.947947	0.9491	0.947332	0.950212	0.950222	0.950395	0.961633	0.969175	0.999454
9088.6	0.949166	0.94944	0.947435	0.948841	0.947058	0.949968	0.949885	0.950254	0.96092	0.969119	0.998557
9088.9	0.94887	0.94903	0.947231	0.94865	0.946723	0.949666	0.949454	0.949806	0.960228	0.96908	0.997515
9089.18	0.948573	0.948813	0.946827	0.94858	0.946487	0.94961	0.949303	0.949704	0.959289	0.968974	0.996542
9089.47	0.948527	0.94851	0.946748	0.948293	0.946256	0.949023	0.948986	0.949285	0.958387	0.968967	0.995613
9089.76	0.948215	0.948164	0.946711	0.948127	0.946086	0.949153	0.94878	0.949383	0.957286	0.968948	0.994598
9090.06	0.948118	0.948227	0.946436	0.948016	0.94589	0.948695	0.948562	0.949106	0.95602	0.968933	0.993443
9090.36	0.948166	0.948008	0.94655	0.948035	0.945719	0.948889	0.948508	0.949327	0.954815	0.968948	0.992443
9090.67	0.948052	0.948161	0.94628	0.947904	0.94575	0.948607	0.948491	0.948921	0.953315	0.968946	0.991323
9090.97	0.94811	0.947853	0.946406	0.94814	0.945734	0.948828	0.948376	0.949134	0.951911	0.96899	0.990259
9091.26	0.947936	0.948158	0.946097	0.94812	0.945693	0.948718	0.948439	0.949203	0.950246	0.968986	0.989186
9091.55	0.948236	0.947803	0.946381	0.948261	0.945793	0.948666	0.948305	0.949112	0.948612	0.968957	0.988118
9091.85	0.948079	0.948229	0.94617	0.948301	0.945861	0.949071	0.948664	0.949373	0.946842	0.968883	0.987051
9092.14	0.948303	0.948297	0.946432	0.948426	0.945987	0.949023	0.948524	0.949307	0.945071	0.968812	0.985974
9092.44	0.948503	0.94859	0.946627	0.948763	0.946169	0.949417	0.948848	0.949735	0.943208	0.968814	0.9849
9092.74	0.94861	0.948803	0.946648	0.948935	0.946295	0.949318	0.948925	0.949699	0.941373	0.968793	0.983852
9093.05	0.948927	0.94888	0.946909	0.94928	0.946536	0.949835	0.949256	0.950137	0.939534	0.968684	0.982935
9093.35	0.949056	0.949311	0.946891	0.949426	0.946806	0.949953	0.949471	0.95025	0.937688	0.968621	0.981823
9093.65	0.949599	0.949373	0.947359	0.949926	0.947079	0.95035	0.949716	0.950678	0.935975	0.968574	0.980902
9093.95	0.949704	0.950017	0.947344	0.950101	0.947502	0.950679	0.95006	0.950859	0.934108	0.968441	0.979877
9094.24	0.950116	0.950161	0.94793	0.950606	0.947784	0.950972	0.950291	0.951074	0.932505	0.968376	0.978908
9094.54	0.950392	0.950765	0.948015	0.950888	0.948215	0.951418	0.950812	0.95176	0.93074	0.968249	0.977885
9094.83	0.95085	0.950986	0.948592	0.951334	0.948634	0.951582	0.951141	0.951976	0.929247	0.968101	0.976887
9095.14	0.95122	0.951621	0.948874	0.951938	0.949047	0.952174	0.951697	0.952617	0.927725	0.968027	0.976099
9095.44	0.951747	0.951892	0.949379	0.952418	0.949387	0.952396	0.951995	0.952898	0.926383	0.967959	0.975233
9095.75	0.952225	0.952463	0.949788	0.9529	0.949935	0.953204	0.952668	0.953367	0.925144	0.96789	0.97432
9096.04	0.952617	0.953177	0.950035	0.953325	0.950495	0.953484	0.953023	0.953664	0.923977	0.967806	0.973334
9096.32	0.953227	0.953587	0.95085	0.953962	0.950929	0.954136	0.953673	0.954315	0.923087	0.967776	0.972531
9096.6	0.953564	0.954344	0.951069	0.954458	0.951552	0.954527	0.954129	0.95483	0.922188	0.967668	0.971675
9096.89	0.954239	0.954646	0.951709	0.954986	0.952129	0.955234	0.954821	0.955423	0.921609	0.967689	0.970904
9097.19	0.954746	0.955547	0.952141	0.955498	0.952841	0.955889	0.955378	0.955854	0.921001	0.967742	0.970107
9097.5	0.955517	0.956024	0.952889	0.956312	0.953462	0.956393	0.955986	0.956491	0.920769	0.967795	0.969262
9097.81	0.95599	0.956667	0.953432	0.956999	0.954079	0.957114	0.956672	0.957226	0.920509	0.967867	0.968585
9098.11	0.956697	0.957311	0.954194	0.957585	0.954723	0.957621	0.957299	0.957803	0.920476	0.967863	0.967855
9098.4	0.957367	0.958031	0.954874	0.958341	0.955482	0.95857	0.958038	0.958645	0.920638	0.967822	0.967255
9098.68	0.958047	0.958855	0.955386	0.958868	0.95615	0.958877	0.958689	0.959001	0.92092	0.967814	0.966576
9098.97	0.958675	0.959288	0.956169	0.959603	0.956902	0.95978	0.959451	0.959823	0.921365	0.967933	0.965926
9099.27	0.959366	0.960279	0.956607	0.960199	0.957607	0.960175	0.960129	0.960179	0.921835	0.968104	0.965318
9099.57	0.96012	0.960856	0.957639	0.960961	0.958413	0.96109	0.960755	0.961013	0.922652	0.968206	0.964825
9099.88	0.960698	0.961761	0.958124	0.961693	0.959109	0.961802	0.961584	0.961653	0.923474	0.968241	0.96419
9100.18	0.961629	0.962354	0.958998	0.962454	0.95983	0.962443	0.962121	0.96239	0.924611	0.968323	0.963777
9100.48	0.96219	0.963238	0.959579	0.963134	0.960622	0.963348	0.962982	0.963203	0.925634	0.968431	0.963372
9100.78	0.962989	0.963836	0.960466	0.963915	0.961443	0.963921	0.963692	0.963726	0.926855	0.968445	0.96289
9101.08	0.963689	0.964675	0.961132	0.964602	0.962178	0.96497	0.964497	0.964613	0.928142	0.968527	0.962445
9101.38	0.964493	0.965488	0.961935	0.965282	0.962942	0.965401	0.965067	0.965137	0.929586	0.968641	0.962063
9101.67	0.965228	0.966182	0.962963	0.966163	0.963767	0.966388	0.966015	0.966064	0.931117	0.968737	0.961803
9101.98	0.965998	0.967141	0.963445	0.966873	0.964554	0.96693	0.966726	0.966453	0.932656	0.968818	0.961421
9102.28	0.966877	0.967801	0.964445	0.967611	0.965294	0.967998	0.967462	0.967374	0.934419	0.96889	0.961301
9102.59	0.967601	0.968906	0.964908	0.968255	0.966078	0.96874	0.968417	0.967897	0.936097	0.968916	0.960989
9102.9	0.968488	0.969595	0.965927	0.96911	0.966984	0.969594	0.969182	0.968639	0.937978	0.96894	0.960828
9103.19	0.969033	0.970452	0.966529	0.969699	0.967753	0.970295	0.970003	0.969267	0.939842	0.969013	0.960608
9103.48	0.969849	0.970962	0.967441	0.970444	0.968677	0.97099	0.970585	0.969944	0.941935	0.969151	0.960515
9103.76	0.970436	0.971735	0.968106	0.971116	0.969511	0.971786	0.971454	0.970773	0.943917	0.96915	0.960471
9104.05	0.971177	0.972366	0.96886	0.971885	0.970238	0.972258	0.972122	0.971197	0.946042	0.969169	0.960421
9104.35	0.971868	0.973095	0.969845	0.972617	0.971088	0.973233	0.973049	0.972176	0.948086	0.969354	0.960414
9104.66	0.97262	0.974121	0.970531	0.973344	0.971881	0.973806	0.973768	0.97278	0.950214	0.969495	0.960455
9104.96	0.97337	0.974619	0.971442	0.974182	0.972648	0.974704	0.974419	0.97366	0.952319	0.969708	0.960635
9105.26	0.974183	0.975577	0.972124	0.974825	0.973353	0.975177	0.97506	0.97408	0.954211	0.96985	0.960654
9105.56	0.974965	0.976201	0.973104	0.975585	0.974181	0.976158	0.975873	0.974826	0.956345	0.969978	0.960692
9105.83	0.975712	0.977062	0.973544	0.976195	0.974809	0.976777	0.976619	0.975226	0.958197	0.970091	0.960879
9106.13	0.976395	0.977693	0.974581	0.976887	0.975538	0.97745	0.97699	0.975992	0.960211	0.970325	0.961143
9106.43	0.976944	0.978602	0.975255	0.977602	0.976354	0.978436	0.978001	0.976609	0.961979	0.970538	0.961356
9106.73	0.977894	0.979216	0.976185	0.9783	0.977036	0.978872	0.978385	0.977151	0.963947	0.970747	0.961677
9107.04	0.978514	0.979939	0.976903	0.979103	0.977762	0.979963	0.979236	0.97801	0.965846	0.970873	0.96199
9107.34	0.979205	0.980761	0.977529	0.97956	0.978552	0.980228	0.979767	0.978405	0.967521	0.971014	0.962239
9107.66	0.9799	0.981307	0.978437	0.980298	0.979229	0.981232	0.980365	0.979258	0.96937	0.971187	0.962808
9107.96	0.980576	0.982268	0.978981	0.980855	0.979867	0.981765	0.980981	0.979675	0.970913	0.971286	0.96323
9108.25	0.981261	0.982624	0.97997	0.981533	0.980597	0.982596	0.981744	0.980433	0.972556	0.971439	0.963713
9108.54	0.981787	0.983559	0.980441	0.982023	0.981253	0.982912	0.982388	0.98077	0.973946	0.971536	0.964241
9108.83	0.982565	0.983973	0.981397	0.982791	0.981901	0.983637	0.982838	0.981364	0.975449	0.971645	0.964791
9109.12	0.983088	0.984744	0.981904	0.983334	0.982563	0.984334	0.983547	0.981991	0.976772	0.971772	0.9654
9109.42	0.983842	0.985237	0.982694	0.983959	0.983206	0.984802	0.983954	0.982451	0.978208	0.97188	0.966059
9109.73	0.984277	0.985908	0.983458	0.984565	0.983797	0.985612	0.984718	0.983162	0.979453	0.97188	0.96667
9110.03	0.985168	0.986551	0.98408	0.985076	0.984341	0.98602	0.985129	0.983537	0.980622	0.971858	0.967277
9110.33	0.985497	0.987067	0.984744	0.985908	0.984932	0.986886	0.98576	0.984427	0.981748	0.971879	0.968146
9110.62	0.986163	0.98789	0.985278	0.986215	0.985495	0.987142	0.986252	0.984693	0.982743	0.971896	0.968744
9110.9	0.986862	0.988201	0.986197	0.98699	0.986037	0.988113	0.986882	0.985395	0.983803	0.971954	0.969646
9111.2	0.987275	0.989026	0.986516	0.987414	0.986618	0.988392	0.987399	0.985599	0.984641	0.971907	0.970358
9111.5	0.987944	0.989356	0.987342	0.988067	0.987249	0.989128	0.987931	0.986107	0.985623	0.971824	0.971225
9111.81	0.988396	0.990207	0.987652	0.988505	0.987869	0.989713	0.988424	0.986607	0.986247	0.971864	0.972
9112.12	0.98905	0.990591	0.988521	0.988951	0.988417	0.990178	0.988949	0.987134	0.986989	0.971932	0.972816
9112.43	0.989475	0.991228	0.988896	0.989523	0.988931	0.990862	0.989646	0.987609	0.987518	0.97191	0.973657
9112.72	0.990146	0.99176	0.98943	0.990032	0.989446	0.991148	0.990032	0.987905	0.988001	0.971933	0.974444
9113.01	0.990472	0.992139	0.98993	0.990513	0.989935	0.991998	0.990552	0.988546	0.988419	0.971959	0.975201
9113.3	0.990981	0.992626	0.990454	0.990973	0.990475	0.992154	0.990908	0.988756	0.988765	0.972054	0.975885
9113.6	0.991511	0.993063	0.991088	0.991512	0.991148	0.992801	0.991444	0.98943	0.989132	0.972166	0.976801
9113.89	0.991943	0.993696	0.9914	0.99188	0.991548	0.992989	0.991875	0.989684	0.989303	0.972234	0.977397
9114.2	0.992444	0.993952	0.992238	0.992391	0.99203	0.993644	0.992411	0.990272	0.989638	0.972422	0.97829
9114.5	0.992706	0.994642	0.992356	0.992756	0.992551	0.993959	0.992803	0.990476	0.989716	0.972537	0.978892
9114.81	0.99328	0.994992	0.993145	0.993257	0.9931	0.994412	0.993124	0.990953	0.989964	0.972732	0.979551
9115.11	0.993625	0.995602	0.993469	0.993733	0.993561	0.99491	0.993714	0.991534	0.990021	0.97301	0.980206
9115.41	0.994131	0.995899	0.994169	0.994171	0.993972	0.995217	0.994	0.991843	0.990163	0.973193	0.980782
9115.7	0.994478	0.99652	0.994513	0.994701	0.994313	0.995838	0.994477	0.992438	0.990179	0.973402	0.981451
9116	0.994989	0.996845	0.994923	0.995037	0.994696	0.996041	0.994757	0.992501	0.99026	0.973723	0.981999
9116.3	0.995243	0.997214	0.995419	0.995567	0.995282	0.99659	0.995166	0.993111	0.990384	0.974007	0.982534
9116.6	0.995712	0.997595	0.99569	0.995808	0.995667	0.996751	0.995618	0.99338	0.990496	0.974333	0.983075
9116.91	0.996209	0.997716	0.996286	0.99617	0.996085	0.997423	0.99586	0.993855	0.990733	0.974727	0.983576
9117.21	0.996565	0.99826	0.996415	0.996576	0.996521	0.997602	0.996357	0.993938	0.990787	0.975078	0.984031
9117.5	0.996902	0.998506	0.996919	0.99702	0.996806	0.9979	0.996479	0.994353	0.99102	0.975464	0.984511
9117.79	0.99697	0.999097	0.997095	0.997322	0.997207	0.998322	0.997	0.994624	0.991177	0.975908	0.984891
9118.07	0.997432	0.999166	0.997586	0.997661	0.997625	0.998652	0.9972	0.994889	0.991564	0.976325	0.985286
9118.37	0.99767	0.99963	0.997889	0.997951	0.997887	0.999108	0.997674	0.995281	0.991918	0.976733	0.985521
9118.67	0.998058	0.999842	0.998317	0.998239	0.998329	0.999098	0.997764	0.995487	0.992397	0.977169	0.985933
9118.98	0.998356	1.00025	0.99867	0.998662	0.99873	0.999743	0.998264	0.996056	0.993018	0.977725	0.986434
9119.29	0.998548	1.00062	0.998931	0.998897	0.999047	0.999678	0.998441	0.996059	0.993744	0.978305	0.986717
9119.59	0.99881	1.00072	0.999298	0.999219	0.999278	1.0002	0.998892	0.996559	0.994632	0.978795	0.987052
9119.88	0.999003	1.00123	0.999445	0.999314	0.999639	1.00025	0.999094	0.996621	0.995415	0.979398	0.987318
9120.17	0.999367	1.00119	0.999828	0.99968	0.999977	1.00058	0.99917	0.997004	0.996661	0.980099	0.987643
9120.46	0.999457	1.00151	0.99988	0.999861	1.00028	1.00077	0.999551	0.997306	0.997676	0.980699	0.987938
9120.75	0.999838	1.00164	1.00041	1.00025	1.00055	1.00096	0.999665	0.997452	0.999099	0.981338	0.988272
9121.06	0.999895	1.00202	1.00047	1.00045	1.00083	1.00145	1.00011	0.997714	1.00042	0.981999	0.98854
9121.36	1.00022	1.00213	1.00083	1.00064	1.00104	1.00135	1.00024	0.997831	1.00208	0.982724	0.988865
9121.67	1.00025	1.00239	1.00096	1.00098	1.00132	1.00186	1.00042	0.99816	1.0038	0.983543	0.989063
9121.97	1.00065	1.00255	1.00101	1.00126	1.00147	1.00183	1.00051	0.998231	1.00564	0.984329	0.989428
9122.27	1.00076	1.00258	1.00136	1.00137	1.00173	1.00229	1.00082	0.998628	1.00771	0.985156	0.989799
9122.58	1.00082	1.00287	1.00141	1.00145	1.00191	1.00222	1.00079	0.998686	1.00987	0.986015	0.989927
9122.87	1.00115	1.00281	1.00174	1.00173	1.0021	1.0025	1.00112	0.998988	1.01234	0.986892	0.990314
9123.17	1.00114	1.00318	1.00157	1.00183	1.00227	1.00255	1.00134	0.998995	1.01466	0.987898	0.990495
9123.47	1.00133	1.00312	1.00195	1.00209	1.00249	1.00289	1.00128	0.999204	1.01727	0.988917	0.990865
9123.78	1.00147	1.00343	1.00191	1.00215	1.00257	1.00297	1.00152	0.999387	1.01993	0.989829	0.991074
9124.09	1.00171	1.00332	1.00211	1.00231	1.00273	1.00285	1.00148	0.99949	1.0227	0.990749	0.991462
9124.4	1.00173	1.00359	1.0022	1.00252	1.00292	1.00324	1.00171	0.99979	1.02538	0.991781	0.991671
9124.69	1.0017	1.00359	1.00228	1.00262	1.00299	1.0031	1.00179	0.999728	1.02821	0.992818	0.991865
9124.98	1.00183	1.0036	1.00249	1.00275	1.00314	1.00356	1.00197	1.00003	1.03115	0.993745	0.992158
9125.27	1.0019	1.00368	1.00231	1.00277	1.00303	1.00323	1.00185	0.999949	1.03405	0.994669	0.992501
9125.56	1.00195	1.00358	1.00257	1.00296	1.00319	1.0036	1.00194	1.00019	1.03706	0.995696	0.992743
9125.86	1.00198	1.00384	1.00242	1.00289	1.00317	1.00346	1.00226	1.00008	1.03991	0.99672	0.993077
9126.17	1.00222	1.00366	1.00268	1.00291	1.0033	1.00373	1.00216	1.0003	1.04297	0.997747	0.993381
9126.47	1.00206	1.00393	1.00241	1.00301	1.00334	1.00375	1.00221	1.00038	1.04563	0.998714	0.993563
9126.78	1.00222	1.00376	1.00256	1.00316	1.00327	1.00353	1.00215	1.00051	1.04848	0.999715	0.993902
9127.07	1.00217	1.00384	1.00248	1.00311	1.00318	1.00384	1.00238	1.00069	1.05091	1.00065	0.994211
9127.36	1.00231	1.00369	1.00258	1.00314	1.00329	1.0036	1.00218	1.00059	1.05343	1.00161	0.99443
9127.65	1.00234	1.00373	1.00271	1.00328	1.00331	1.00388	1.00239	1.00077	1.0557	1.00251	0.99467
9127.95	1.00234	1.0039	1.00252	1.00313	1.00321	1.00364	1.00221	1.00059	1.05785	1.00334	0.994926
9128.25	1.00229	1.00369	1.00265	1.00333	1.0032	1.00397	1.00216	1.001	1.05992	1.00416	0.995276
9128.55	1.00226	1.00405	1.00243	1.00325	1.00326	1.0036	1.00231	1.00085	1.06169	1.005	0.995487
9128.86	1.00235	1.0037	1.00261	1.00338	1.0032	1.00378	1.00225	1.00114	1.06351	1.00585	0.995804
9129.17	1.00226	1.00387	1.00231	1.00329	1.00312	1.00368	1.00241	1.001	1.06497	1.00658	0.995967
9129.48	1.00248	1.00363	1.00256	1.00336	1.00308	1.00376	1.00223	1.00103	1.06651	1.00744	0.996283
9129.78	1.00234	1.0037	1.00229	1.00329	1.00297	1.00385	1.0024	1.00131	1.06766	1.00819	0.996506
9130.07	1.00249	1.00351	1.0024	1.00333	1.00291	1.00373	1.0022	1.00119	1.06875	1.00892	0.996753
9130.37	1.00248	1.00368	1.0023	1.00335	1.00292	1.00381	1.00242	1.00149	1.0695	1.00962	0.997176
9130.66	1.00257	1.00374	1.00222	1.00326	1.00287	1.00354	1.00222	1.00127	1.07021	1.01033	0.997352
9130.97	1.00253	1.0036	1.00228	1.00337	1.00281	1.00388	1.00237	1.00164	1.07075	1.01097	0.99759
9131.28	1.0025	1.00388	1.00201	1.00326	1.00262	1.00355	1.00243	1.00153	1.07109	1.01163	0.997851
9131.58	1.00261	1.00366	1.00227	1.00339	1.00263	1.00391	1.00246	1.00169	1.07142	1.01227	0.998228
9131.87	1.00251	1.00383	1.00205	1.00336	1.00265	1.00377	1.00251	1.00159	1.07149	1.01278	0.998425
9132.16	1.00262	1.00361	1.0022	1.00335	1.00256	1.00386	1.00252	1.00174	1.0716	1.01328	0.998722
9132.45	1.00252	1.00387	1.00195	1.0033	1.00261	1.00394	1.0025	1.00191	1.07141	1.01377	0.999
9132.75	1.00279	1.00369	1.00214	1.00325	1.00256	1.00384	1.0025	1.00179	1.07126	1.01433	0.999348
9133.05	1.00265	1.00379	1.00205	1.00341	1.00261	1.00393	1.00275	1.00207	1.07093	1.01472	0.999657
9133.36	1.00293	1.00381	1.00214	1.0035	1.00267	1.00366	1.00258	1.00205	1.07062	1.01511	0.99997
9133.67	1.00287	1.00379	1.00209	1.00364	1.00262	1.00405	1.00278	1.00242	1.07012	1.01557	1.00027
9133.96	1.0031	1.00406	1.00205	1.00357	1.0027	1.00383	1.00291	1.0022	1.06952	1.01595	1.00052
9134.26	1.00319	1.00398	1.00218	1.00379	1.00265	1.00427	1.00294	1.0025	1.06894	1.01633	1.00088
9134.55	1.00322	1.00437	1.00183	1.00371	1.00265	1.00431	1.00313	1.00229	1.06825	1.01664	1.00124
9134.85	1.00344	1.00422	1.00211	1.00379	1.00263	1.00458	1.00318	1.00263	1.06761	1.01686	1.00161
9135.15	1.0035	1.00459	1.002	1.00392	1.00276	1.00473	1.00338	1.00264	1.06677	1.01704	1.00192
9135.45	1.00369	1.0043	1.00241	1.00395	1.00278	1.00469	1.00353	1.00294	1.06611	1.01727	1.00228
9135.76	1.00362	1.00472	1.00243	1.00412	1.00285	1.00489	1.00377	1.00324	1.06527	1.01745	1.00274
9136.07	1.00389	1.00469	1.0028	1.00425	1.00296	1.00482	1.00361	1.00323	1.06448	1.01772	1.00316
9136.38	1.00401	1.00488	1.0029	1.00444	1.00321	1.0051	1.00385	1.00359	1.06356	1.01796	1.00353
9136.68	1.00425	1.00512	1.00305	1.00455	1.00335	1.00475	1.00391	1.00367	1.06271	1.01815	1.00393
9136.98	1.0043	1.00519	1.0033	1.00486	1.0035	1.00529	1.00404	1.00403	1.0619	1.01825	1.00445
9137.27	1.00449	1.00547	1.00313	1.00486	1.00363	1.00516	1.00424	1.00396	1.06094	1.0183	1.00479
9137.55	1.00479	1.00544	1.00352	1.00517	1.00388	1.00549	1.00447	1.00439	1.06007	1.01842	1.00524
9137.86	1.00494	1.00588	1.00347	1.00518	1.00402	1.00555	1.00464	1.00437	1.05895	1.01854	1.00555
9138.16	1.00518	1.00591	1.00389	1.00555	1.00424	1.00584	1.00481	1.00468	1.05789	1.01863	1.00611
9138.47	1.00518	1.00624	1.00383	1.00562	1.00455	1.00601	1.00528	1.00481	1.05672	1.01865	1.00652
9138.78	1.00557	1.00641	1.00413	1.00582	1.00472	1.00625	1.00533	1.00502	1.05566	1.01871	1.00693
9139.07	1.00568	1.00658	1.0042	1.00605	1.00496	1.00661	1.0057	1.00542	1.05442	1.01876	1.00728
9139.37	1.00598	1.00682	1.00434	1.00622	1.00525	1.00664	1.00584	1.00537	1.0531	1.01883	1.00766
9139.66	1.00623	1.00695	1.00472	1.00647	1.00553	1.0072	1.00624	1.00577	1.05177	1.01883	1.00793
9139.95	1.00639	1.0073	1.00472	1.00657	1.00571	1.00711	1.00627	1.00577	1.05021	1.01881	1.0083
9140.25	1.0067	1.00744	1.00517	1.00683	1.00593	1.00758	1.00662	1.00612	1.0488	1.01883	1.00856
9140.56	1.00678	1.00787	1.00508	1.00704	1.00624	1.00757	1.00684	1.0062	1.04714	1.0189	1.00893
9140.87	1.00717	1.0079	1.00557	1.0074	1.00655	1.00794	1.00713	1.00652	1.04555	1.01883	1.00926
9141.17	1.00728	1.00836	1.00544	1.00745	1.00676	1.00813	1.00753	1.00679	1.04369	1.0187	1.0095
9141.46	1.00756	1.00843	1.00598	1.00776	1.00698	1.0083	1.00753	1.00696	1.04203	1.01879	1.00967
9141.75	1.00766	1.00876	1.00604	1.00787	1.0072	1.00866	1.00797	1.00732	1.04017	1.01882	1.00993
9142.04	1.00801	1.0088	1.00628	1.00807	1.00751	1.0086	1.00794	1.00732	1.03832	1.01874	1.01011
9142.35	1.00825	1.00918	1.00653	1.0083	1.0078	1.00912	1.00844	1.00774	1.03629	1.01871	1.01019
9142.66	1.00846	1.00941	1.00675	1.00849	1.00796	1.00915	1.00859	1.00766	1.0342	1.01867	1.01028
9142.97	1.00871	1.00948	1.00717	1.00879	1.00837	1.00962	1.00882	1.00818	1.0321	1.01868	1.01057
9143.28	1.00883	1.00996	1.0071	1.00883	1.00854	1.00968	1.00889	1.00807	1.02986	1.01866	1.0104
9143.6	1.00913	1.00996	1.00764	1.00921	1.00888	1.01011	1.00919	1.00856	1.02769	1.01866	1.01057
9143.9	1.00926	1.01035	1.00753	1.0092	1.00913	1.01014	1.00949	1.00869	1.02536	1.01856	1.01058
9144.2	1.00953	1.01032	1.00807	1.00958	1.00933	1.01031	1.00973	1.00886	1.0232	1.01861	1.01052
9144.49	1.00969	1.01074	1.00819	1.00967	1.0095	1.01065	1.01002	1.00895	1.0209	1.01859	1.01053
9144.78	1.00987	1.01065	1.00841	1.00981	1.00969	1.0107	1.00997	1.00901	1.01859	1.01852	1.01043
9145.08	1.00992	1.01087	1.00846	1.00994	1.00986	1.01113	1.01048	1.00931	1.01609	1.0185	1.01033
9145.39	1.0102	1.01106	1.00873	1.01011	1.01011	1.01105	1.01053	1.00926	1.01362	1.01849	1.0102
9145.69	1.01022	1.01113	1.00896	1.01029	1.01031	1.01144	1.01078	1.00973	1.01126	1.0184	1.01014
9146	1.01043	1.0115	1.00897	1.01037	1.01056	1.01137	1.01097	1.00977	1.00871	1.0183	1.01
9146.29	1.01074	1.01136	1.00931	1.0106	1.01073	1.0117	1.01117	1.00995	1.00628	1.01825	1.00994
9146.58	1.01063	1.01174	1.00933	1.01063	1.01083	1.01174	1.01127	1.00999	1.00372	1.01819	1.00967
9146.86	1.01096	1.01173	1.00968	1.01082	1.01089	1.01199	1.01129	1.0102	1.00121	1.01814	1.00962
9147.17	1.01093	1.01207	1.00952	1.01088	1.01103	1.01203	1.01156	1.0103	0.998497	1.01804	1.0094
9147.47	1.01117	1.01192	1.00993	1.01098	1.01115	1.01201	1.01144	1.01042	0.99591	1.01795	1.00924
9147.77	1.01118	1.01201	1.00996	1.01096	1.01128	1.01223	1.01169	1.01057	0.993126	1.01788	1.00889
9148.07	1.01123	1.01218	1.01013	1.01097	1.01137	1.01199	1.01172	1.01045	0.99059	1.01785	1.00878
9148.37	1.0113	1.01216	1.01028	1.01119	1.01139	1.01236	1.01191	1.01084	0.987993	1.01774	1.00855
9148.66	1.01131	1.01222	1.01029	1.01119	1.01147	1.01221	1.01205	1.01066	0.985358	1.01759	1.00826
9148.95	1.01144	1.01202	1.01045	1.01137	1.01166	1.01249	1.0121	1.0109	0.98273	1.01754	1.00806
9149.25	1.01137	1.01234	1.01031	1.0112	1.01163	1.0123	1.01217	1.01076	0.980005	1.01737	1.00782
9149.56	1.01145	1.01214	1.01073	1.01139	1.01168	1.01245	1.012	1.01095	0.97725	1.01719	1.00749
9149.87	1.01148	1.0124	1.01051	1.01135	1.01166	1.01246	1.01217	1.01086	0.974487	1.01707	1.00716
9150.18	1.01168	1.01216	1.01082	1.01147	1.01176	1.01253	1.0122	1.0109	0.971774	1.01698	1.00697
9150.49	1.01154	1.01233	1.01068	1.01142	1.01177	1.01251	1.01234	1.01109	0.96916	1.01683	1.00669
9150.8	1.01167	1.01223	1.01096	1.01153	1.01177	1.01237	1.01217	1.01101	0.96661	1.01674	1.00654
9151.11	1.0116	1.01217	1.01097	1.01153	1.01179	1.01245	1.01219	1.01112	0.963981	1.01661	1.00626
9151.41	1.01164	1.01222	1.01101	1.01124	1.01176	1.01229	1.01208	1.01082	0.961386	1.01641	1.00604
9151.69	1.01157	1.01211	1.01106	1.01142	1.01187	1.01243	1.01215	1.01107	0.958881	1.01621	1.00575
9151.99	1.01163	1.01219	1.01095	1.01124	1.01173	1.0123	1.012	1.01097	0.956319	1.01602	1.00543
9152.29	1.01153	1.01194	1.01112	1.01133	1.01167	1.01245	1.01204	1.0109	0.953933	1.01582	1.00519
9152.6	1.0114	1.01201	1.01098	1.01113	1.01159	1.01234	1.01201	1.01088	0.951297	1.0157	1.00489
9152.91	1.01146	1.01173	1.0111	1.01128	1.01153	1.01235	1.01179	1.01095	0.948833	1.01562	1.00461
9153.22	1.01135	1.01205	1.01085	1.01127	1.01146	1.01234	1.01193	1.01082	0.946517	1.01541	1.0043
9153.51	1.01137	1.01182	1.01098	1.01114	1.01142	1.01213	1.01176	1.01073	0.944258	1.01526	1.00405
9153.81	1.01119	1.01157	1.01086	1.01108	1.01138	1.01229	1.01192	1.0108	0.94192	1.01506	1.00385
9154.1	1.01117	1.01153	1.01082	1.011	1.01127	1.01195	1.01158	1.01047	0.939751	1.01483	1.00357
9154.4	1.01103	1.01144	1.01086	1.01094	1.01126	1.01221	1.01177	1.01076	0.937645	1.0147	1.00329
9154.7	1.0109	1.01146	1.01079	1.01076	1.01108	1.01168	1.01148	1.01042	0.935613	1.01447	1.00299
9155.01	1.01099	1.01112	1.01082	1.01073	1.01105	1.01192	1.01145	1.0105	0.933745	1.01432	1.00271
9155.31	1.01077	1.01118	1.01055	1.01051	1.01084	1.01153	1.01132	1.01027	0.931992	1.01412	1.00254
9155.6	1.01087	1.01103	1.0107	1.01047	1.01077	1.01159	1.01122	1.01031	0.930437	1.01389	1.00232
9155.89	1.01058	1.01103	1.01027	1.01038	1.01061	1.01135	1.01124	1.01009	0.928873	1.01359	1.00205
9156.19	1.0107	1.01063	1.01041	1.01039	1.01061	1.0113	1.01084	1.01005	0.927463	1.01332	1.00177
9156.48	1.01042	1.01076	1.01021	1.01029	1.01047	1.0113	1.01096	1.00994	0.926222	1.01301	1.00158
9156.79	1.01034	1.01044	1.01022	1.01012	1.01034	1.01096	1.01054	1.00973	0.925069	1.01279	1.00133
9157.1	1.01016	1.01032	1.01008	1.00996	1.01029	1.01109	1.01064	1.00972	0.924037	1.0125	1.00113
9157.42	1.01008	1.01025	1.00994	1.00979	1.01014	1.01066	1.01031	1.00946	0.923188	1.01217	1.00083
9157.73	1.00996	1.01	1.01003	1.00982	1.01001	1.01081	1.01038	1.00967	0.9226	1.01181	1.00065
9158.04	1.00974	1.01003	1.00963	1.00952	1.00991	1.01032	1.01018	1.00917	0.922024	1.01151	1.00041
9158.34	1.00967	1.00958	1.00984	1.00945	1.00977	1.01042	1.01005	1.00921	0.921762	1.01121	1.00036
9158.64	1.0095	1.00965	1.00951	1.00925	1.0096	1.01006	1.00992	1.00905	0.921547	1.01085	1.00003
9158.93	1.00938	1.00915	1.00955	1.00906	1.0095	1.00985	1.00967	1.00891	0.921614	1.0105	0.999952
9159.22	1.00902	1.00933	1.0093	1.00901	1.00938	1.0099	1.00972	1.00888	0.92167	1.01008	0.999749
9159.52	1.00911	1.009	1.0093	1.0088	1.00918	1.00946	1.00935	1.00854	0.92194	1.00972	0.999671
9159.83	1.00899	1.00896	1.00911	1.00875	1.00914	1.00948	1.00943	1.00865	0.922322	1.0093	0.999472
9160.14	1.00882	1.00869	1.00895	1.00862	1.00892	1.00911	1.00906	1.00837	0.922869	1.00877	0.999236
9160.44	1.00852	1.00857	1.00895	1.00853	1.00883	1.00923	1.00895	1.0084	0.923597	1.0083	0.999255
9160.74	1.00832	1.00844	1.00864	1.00819	1.00865	1.00872	1.0088	1.00807	0.924439	1.00785	0.999022
9161.03	1.00832	1.00805	1.00867	1.00822	1.00851	1.00882	1.00868	1.00799	0.925516	1.00736	0.999006
9161.33	1.00803	1.00794	1.00821	1.00789	1.00825	1.0083	1.00841	1.00756	0.926636	1.00671	0.998843
9161.63	1.00783	1.00757	1.00832	1.00778	1.00813	1.00831	1.00807	1.00754	0.928024	1.00615	0.998822
9161.94	1.00755	1.00757	1.00788	1.0075	1.00795	1.00806	1.00795	1.00741	0.929316	1.00565	0.998711
9162.25	1.00758	1.00723	1.00793	1.00742	1.00786	1.00775	1.00774	1.00722	0.931005	1.00511	0.998718
9162.55	1.00723	1.00706	1.0076	1.00715	1.00758	1.00765	1.00779	1.00714	0.932534	1.00452	0.998544
9162.85	1.0071	1.00684	1.00746	1.00694	1.00739	1.00717	1.00738	1.00685	0.934312	1.00389	0.998505
9163.15	1.00691	1.00665	1.00725	1.00677	1.00726	1.00724	1.00741	1.00679	0.936175	1.00335	0.99851
9163.44	1.00665	1.00657	1.00693	1.00657	1.00704	1.00675	1.00698	1.00641	0.938118	1.00279	0.998365
9163.73	1.00649	1.00597	1.00682	1.00651	1.0069	1.00673	1.00679	1.00635	0.940155	1.00214	0.998463
9164.03	1.00618	1.00599	1.00654	1.0063	1.00673	1.00635	1.00661	1.00606	0.942151	1.00141	0.998361
9164.34	1.00615	1.00555	1.00654	1.00609	1.00651	1.00636	1.00635	1.00593	0.944435	1.00079	0.99846
9164.66	1.00576	1.00563	1.00598	1.00579	1.00629	1.00603	1.00626	1.00558	0.946617	1.00006	0.998455
9164.97	1.00572	1.00527	1.00596	1.00564	1.0061	1.00583	1.0059	1.00535	0.948992	0.999377	0.998571
9165.28	1.00535	1.00538	1.00557	1.00543	1.00588	1.0057	1.00581	1.00523	0.951246	0.998738	0.998568
9165.58	1.00528	1.00491	1.00552	1.0051	1.00571	1.0052	1.00543	1.00491	0.953611	0.998083	0.99865
9165.88	1.00502	1.00467	1.00534	1.00504	1.00546	1.0053	1.00537	1.00492	0.955923	0.997355	0.998646
9166.17	1.00472	1.00442	1.0049	1.00479	1.00519	1.00489	1.00495	1.00454	0.958176	0.996671	0.998604
9166.46	1.00444	1.00424	1.00473	1.00467	1.00499	1.00467	1.00493	1.00459	0.960424	0.995978	0.998646
9166.75	1.00426	1.00408	1.00448	1.00431	1.00477	1.00415	1.00453	1.00421	0.96262	0.995249	0.998707
9167.07	1.00415	1.00366	1.00442	1.00418	1.00463	1.0042	1.00451	1.0041	0.965019	0.994591	0.998863
9167.38	1.0038	1.00364	1.00393	1.00385	1.00437	1.00387	1.00418	1.00374	0.967256	0.993851	0.998804
9167.68	1.00366	1.00319	1.00396	1.00371	1.00417	1.00376	1.00394	1.00364	0.969537	0.993092	0.998935
9167.98	1.0034	1.00315	1.00358	1.00347	1.00394	1.0034	1.00386	1.00341	0.971706	0.992409	0.999028
9168.28	1.00323	1.00274	1.00341	1.00335	1.00368	1.00315	1.00342	1.00315	0.973936	0.991717	0.999162
9168.57	1.00292	1.00267	1.0031	1.00306	1.00344	1.00303	1.00336	1.0031	0.975934	0.990958	0.999193
9168.87	1.00278	1.00237	1.00292	1.00269	1.00323	1.00262	1.00297	1.00268	0.978076	0.990234	0.999092
9169.17	1.0024	1.00212	1.00287	1.00255	1.00293	1.00262	1.00277	1.00273	0.979965	0.989577	0.999228
9169.48	1.0023	1.00186	1.00243	1.00229	1.00275	1.00222	1.00265	1.00226	0.981836	0.988828	0.999273
9169.78	1.00201	1.00158	1.00225	1.00212	1.00251	1.00211	1.00242	1.00226	0.98372	0.988227	0.999413
9170.08	1.00178	1.00164	1.0019	1.00174	1.00234	1.0017	1.00221	1.00196	0.985407	0.98758	0.999304
9170.37	1.00166	1.00119	1.00178	1.00164	1.00208	1.00171	1.00193	1.00178	0.987175	0.986893	0.999461
9170.67	1.00126	1.0012	1.00144	1.00132	1.00184	1.00131	1.00165	1.00154	0.988608	0.986081	0.999503
9170.97	1.00111	1.0007	1.00135	1.00119	1.0016	1.00102	1.0015	1.0012	0.990161	0.985451	0.999619
9171.28	1.00084	1.00061	1.00103	1.00088	1.00139	1.00096	1.00129	1.00105	0.991548	0.98484	0.999573
9171.59	1.00071	1.0002	1.00085	1.00066	1.00117	1.00052	1.00096	1.00077	0.992951	0.984189	0.999617
9171.91	1.00047	1.00004	1.00063	1.00046	1.00091	1.00064	1.0009	1.00077	0.994209	0.983603	0.999743
9172.22	1.00027	0.999787	1.00037	1.00018	1.0007	0.999959	1.00048	1.00044	0.995452	0.983041	0.999708
9172.53	1.00016	0.999572	1.00019	1.00009	1.00039	1.00002	1.00044	1.00049	0.996611	0.982472	0.999805
9172.84	0.999829	0.9996	0.999835	0.999811	1.00023	0.999578	1.00018	1.00003	0.997434	0.981954	0.999818
9173.14	0.999642	0.999089	0.999914	0.999649	1.00001	0.999598	0.999921	1.00001	0.998469	0.98152	0.999955
9173.43	0.999348	0.999226	0.999359	0.999313	0.999747	0.99915	0.999856	0.999746	0.999181	0.981125	0.999919
9173.72	0.999248	0.998827	0.999342	0.9992	0.999529	0.998962	0.99942	0.999516	1.00004	0.98073	0.999957
9174.03	0.99894	0.998728	0.998943	0.998873	0.999363	0.998883	0.999489	0.999455	1.00068	0.980383	1.00001
9174.33	0.998913	0.998505	0.998873	0.998761	0.999171	0.998532	0.999019	0.999127	1.00143	0.980108	1.00013
9174.65	0.998594	0.998389	0.998679	0.998569	0.998975	0.998587	0.998897	0.999118	1.00199	0.979676	1.00011
9174.96	0.998415	0.998125	0.998443	0.998228	0.998767	0.998184	0.998685	0.998675	1.00252	0.979455	1.00019
9175.25	0.99823	0.997853	0.998312	0.998221	0.998558	0.998212	0.998613	0.998827	1.00295	0.979387	1.00019
9175.54	0.997991	0.997939	0.997957	0.997811	0.998291	0.997758	0.998423	0.998316	1.00332	0.979269	1.00032
9175.84	0.997844	0.99746	0.997984	0.997662	0.998168	0.997822	0.998184	0.998384	1.00374	0.979227	1.00037
9176.13	0.997673	0.997406	0.997573	0.997356	0.997822	0.997364	0.997948	0.998014	1.00395	0.979126	1.00042
9176.44	0.997496	0.997067	0.997624	0.997225	0.997731	0.997233	0.997765	0.997928	1.0043	0.979047	1.00057
9176.75	0.997213	0.997071	0.997213	0.996921	0.997515	0.996889	0.997765	0.99773	1.00434	0.979023	1.0006
9177.05	0.997204	0.996766	0.997161	0.996817	0.997283	0.996765	0.997351	0.997604	1.00452	0.979049	1.00069
9177.35	0.99686	0.996678	0.996939	0.996623	0.997122	0.996728	0.997333	0.997367	1.00457	0.979155	1.00079
9177.64	0.996859	0.996399	0.99686	0.996332	0.996947	0.996292	0.996976	0.997136	1.00467	0.979329	1.00084
9177.93	0.996518	0.996296	0.99669	0.996316	0.996771	0.996431	0.997081	0.99715	1.0046	0.979475	1.00087
9178.22	0.99643	0.996129	0.996394	0.996074	0.996669	0.995977	0.996696	0.996854	1.00449	0.979688	1.00099
9178.53	0.996203	0.995755	0.996405	0.995919	0.996388	0.99596	0.996513	0.99674	1.00443	0.979931	1.00114
9178.84	0.996044	0.995761	0.996147	0.995613	0.996199	0.995577	0.99638	0.996525	1.0042	0.980221	1.00107
9179.16	0.995966	0.995376	0.996285	0.995669	0.996071	0.995602	0.996119	0.996557	1.00419	0.980621	1.00124
9179.47	0.995642	0.995411	0.995828	0.995365	0.995947	0.995206	0.996053	0.996289	1.00396	0.980951	1.0013
9179.79	0.995778	0.995018	0.995968	0.995218	0.995729	0.995077	0.995812	0.99613	1.00386	0.981261	1.00144
9180.09	0.995447	0.995043	0.995648	0.99512	0.995582	0.994921	0.995827	0.996085	1.00357	0.98162	1.00147
9180.39	0.995505	0.994659	0.99569	0.994895	0.995453	0.994569	0.995496	0.995777	1.00343	0.982099	1.00159
9180.69	0.995259	0.994688	0.995447	0.99478	0.99534	0.994661	0.995532	0.995917	1.00318	0.982546	1.0017
9180.98	0.995097	0.994509	0.995405	0.994598	0.995154	0.994298	0.995188	0.995584	1.00296	0.98304	1.0017
9181.28	0.99498	0.994182	0.995374	0.994553	0.994953	0.994417	0.995048	0.995598	1.00273	0.983494	1.0018
9181.6	0.99487	0.994258	0.995082	0.994278	0.994816	0.994016	0.994979	0.995297	1.00243	0.983989	1.00183
9181.9	0.994676	0.993996	0.995161	0.994176	0.994782	0.994115	0.994748	0.99533	1.00229	0.984624	1.002
9182.21	0.994357	0.994023	0.994845	0.993915	0.994584	0.993721	0.994685	0.995063	1.00203	0.985147	1.00196
9182.51	0.994432	0.993734	0.994952	0.993885	0.994404	0.993758	0.994508	0.995004	1.00186	0.985704	1.00208
9182.81	0.994132	0.993736	0.99451	0.993788	0.994321	0.993603	0.994512	0.994751	1.00167	0.986187	1.00214
9183.1	0.994223	0.993454	0.994627	0.993575	0.994229	0.993268	0.994098	0.994709	1.00154	0.986678	1.00226
9183.4	0.994061	0.993483	0.994363	0.993521	0.994056	0.993358	0.99414	0.99459	1.00142	0.987224	1.00225
9183.71	0.993992	0.993385	0.994418	0.993309	0.99393	0.992911	0.993825	0.994343	1.00136	0.987804	1.00224
9184.03	0.993822	0.993147	0.994382	0.993336	0.993852	0.993227	0.993833	0.994479	1.00121	0.988361	1.00228
9184.34	0.993797	0.992999	0.994176	0.993101	0.99374	0.992769	0.993487	0.994236	1.00107	0.98897	1.0024
9184.64	0.99365	0.992767	0.994325	0.993144	0.99357	0.99301	0.993462	0.994354	1.00096	0.989544	1.00246
9184.93	0.993519	0.99289	0.993942	0.992887	0.993356	0.99256	0.993347	0.994124	1.00078	0.990064	1.0024
9185.21	0.993523	0.992693	0.994049	0.992892	0.993286	0.992733	0.993249	0.994076	1.00075	0.990533	1.00244
9185.5	0.993307	0.992887	0.993789	0.992763	0.99315	0.992639	0.993177	0.993751	1.0006	0.990936	1.00244
9185.81	0.993393	0.992512	0.993806	0.99264	0.993013	0.99251	0.992941	0.993596	1.00065	0.991468	1.00244
9186.12	0.993141	0.992566	0.993449	0.992324	0.993006	0.992558	0.993079	0.993455	1.00061	0.991945	1.00255
9186.43	0.992901	0.992268	0.99346	0.99234	0.992951	0.992161	0.992852	0.993174	1.00067	0.992427	1.00249
9186.74	0.99281	0.992055	0.993503	0.9922	0.992896	0.992157	0.99296	0.993265	1.00066	0.992886	1.0025
9187.05	0.992683	0.991928	0.993403	0.991934	0.992856	0.991749	0.992742	0.9932	1.0007	0.993352	1.00258
9187.36	0.992584	0.991703	0.993491	0.992033	0.992883	0.991816	0.992691	0.99333	1.00079	0.993835	1.00261
9187.66	0.992551	0.991782	0.993218	0.992076	0.992664	0.991348	0.992586	0.992987	1.00079	0.994117	1.00254
9187.95	0.99253	0.991493	0.993296	0.992081	0.992803	0.991649	0.992499	0.993101	1.00098	0.99445	1.00268
9188.25	0.992247	0.991546	0.992925	0.991969	0.992638	0.991262	0.992453	0.993031	1.00095	0.99478	1.00257
9188.56	0.992384	0.991521	0.993231	0.991908	0.992534	0.991319	0.992202	0.992911	1.00103	0.995171	1.00273
9188.87	0.992285	0.991688	0.993087	0.99194	0.992491	0.991246	0.992234	0.992805	1.00096	0.995482	1.00268
9189.18	0.992423	0.991334	0.993162	0.991781	0.99237	0.991177	0.992028	0.992668	1.00103	0.995743	1.00259
9189.49	0.992147	0.991506	0.993077	0.991717	0.992341	0.991391	0.992251	0.992846	1.00094	0.995954	1.00266
9189.78	0.99222	0.991424	0.992975	0.991595	0.99227	0.991137	0.992037	0.992431	1.00089	0.99613	1.00265
9190.08	0.992144	0.991399	0.993057	0.991698	0.992186	0.991274	0.99209	0.992754	1.0008	0.99634	1.00262
9190.37	0.992033	0.991383	0.992964	0.991601	0.992151	0.991012	0.991841	0.992427	1.00063	0.996506	1.00253
9190.67	0.992067	0.991255	0.993007	0.991523	0.99197	0.991178	0.991851	0.992596	1.00053	0.996596	1.0026
9190.99	0.991938	0.991247	0.992713	0.99165	0.991938	0.990911	0.991766	0.992164	1.0003	0.996605	1.0025
9191.3	0.991997	0.99098	0.992948	0.991582	0.99191	0.99108	0.991728	0.992274	1.00013	0.996703	1.00248
9191.6	0.991893	0.991114	0.992648	0.991476	0.991887	0.990904	0.991685	0.992258	0.999828	0.996775	1.00254
9191.91	0.99196	0.990993	0.992848	0.991463	0.99182	0.990883	0.991484	0.992213	0.999734	0.996861	1.00248
9192.2	0.991749	0.991066	0.992723	0.991481	0.991844	0.990961	0.991564	0.992322	0.999409	0.996811	1.00252
9192.49	0.991822	0.990795	0.992709	0.991389	0.991891	0.990883	0.991373	0.992062	0.999194	0.996778	1.00239
9192.78	0.9919	0.990958	0.992715	0.99149	0.991838	0.990938	0.991531	0.992192	0.998934	0.996769	1.00237
9193.09	0.991789	0.991009	0.992625	0.991426	0.991785	0.990714	0.991474	0.99198	0.998647	0.996725	1.00228
9193.41	0.991741	0.990807	0.992685	0.991426	0.991787	0.990959	0.991345	0.992115	0.998498	0.996671	1.00229
9193.72	0.991677	0.990981	0.992389	0.991299	0.991808	0.990733	0.99134	0.991805	0.998191	0.996538	1.00222
9194.03	0.991684	0.990758	0.992466	0.99141	0.991716	0.990879	0.991302	0.992051	0.998069	0.996577	1.00218
9194.35	0.991603	0.990931	0.992436	0.991347	0.991736	0.990774	0.99149	0.991889	0.997773	0.996462	1.00214
9194.65	0.991773	0.99092	0.992557	0.991393	0.991594	0.990826	0.991289	0.991841	0.997686	0.996294	1.00216
9194.96	0.991687	0.991075	0.992404	0.991381	0.991706	0.990876	0.99145	0.991958	0.997429	0.996201	1.002
9195.26	0.991724	0.990855	0.992489	0.991394	0.991612	0.990742	0.991123	0.9918	0.997407	0.996119	1.00196
9195.56	0.99159	0.991005	0.992358	0.991476	0.991645	0.990883	0.991495	0.991949	0.997274	0.995993	1.00198
9195.86	0.991594	0.990967	0.9923	0.991331	0.991577	0.990634	0.991194	0.991602	0.997349	0.995808	1.00201
9196.18	0.99161	0.990878	0.992428	0.99149	0.991669	0.991038	0.991327	0.991819	0.99745	0.995679	1.00189
9196.48	0.991607	0.99109	0.992241	0.991364	0.991648	0.99075	0.991242	0.99157	0.997508	0.995556	1.00169
9196.79	0.99164	0.990989	0.992299	0.991473	0.991643	0.991117	0.991285	0.991802	0.997794	0.995452	1.00175
9197.09	0.991621	0.991161	0.992221	0.991494	0.991614	0.990732	0.991459	0.99172	0.998004	0.995279	1.00168
9197.37	0.991744	0.990969	0.992508	0.991528	0.991568	0.991079	0.991312	0.991732	0.99844	0.995123	1.00165
9197.66	0.991523	0.991109	0.992226	0.991502	0.991621	0.991029	0.991486	0.991634	0.998752	0.99495	1.00143
9197.96	0.991643	0.991043	0.992349	0.99157	0.991639	0.990995	0.991273	0.991593	0.99936	0.994794	1.00143
9198.27	0.99149	0.991315	0.992338	0.991598	0.991746	0.99103	0.991497	0.991705	0.999865	0.994651	1.0013
9198.58	0.991755	0.991215	0.992197	0.991523	0.991806	0.991005	0.991299	0.991629	1.00063	0.994576	1.00122
9198.88	0.991614	0.991322	0.992175	0.991635	0.991778	0.991276	0.991368	0.991747	1.00142	0.994493	1.00115
9199.19	0.991613	0.991365	0.992132	0.991572	0.991756	0.991011	0.991317	0.991592	1.00219	0.994327	1.00106
9199.49	0.991751	0.991209	0.9923	0.9917	0.991738	0.991294	0.991456	0.991682	1.00319	0.994188	1.00102
9199.77	0.991594	0.991436	0.992025	0.991506	0.991733	0.991106	0.99156	0.991537	1.00411	0.993987	1.0009
9200.07	0.991669	0.991253	0.992219	0.991789	0.991794	0.991259	0.991435	0.991604	1.00525	0.993898	1.00086
9200.38	0.991609	0.991482	0.991957	0.991705	0.991926	0.991192	0.991495	0.99154	1.00629	0.993709	1.00066
9200.69	0.991738	0.991271	0.992207	0.991763	0.991871	0.991183	0.991534	0.991567	1.00758	0.993595	1.00058
9201.01	0.991648	0.991354	0.992067	0.991828	0.991966	0.9913	0.99159	0.991774	1.00877	0.99346	1.00056
9201.32	0.991851	0.991468	0.992186	0.991867	0.99191	0.991202	0.991312	0.991607	1.01018	0.993316	1.0005
9201.64	0.991924	0.991627	0.992313	0.991794	0.991934	0.991536	0.991532	0.991749	1.0116	0.993263	1.00038
9201.96	0.991993	0.991473	0.992264	0.991841	0.991922	0.991178	0.991489	0.991562	1.01305	0.993228	1.00023
9202.26	0.991865	0.991502	0.992356	0.991997	0.991936	0.991526	0.991625	0.991873	1.01458	0.993049	1.00023
9202.56	0.99191	0.991546	0.992252	0.991934	0.991935	0.991262	0.991579	0.991678	1.016	0.992893	1.00006
9202.85	0.991884	0.991395	0.992383	0.99201	0.99212	0.991408	0.991628	0.991775	1.01751	0.99278	1.00001
9203.16	0.991757	0.991668	0.992289	0.991933	0.992123	0.991353	0.991567	0.991774	1.01896	0.992573	0.999864
9203.48	0.99199	0.991569	0.99245	0.991998	0.992132	0.991413	0.991711	0.991897	1.02067	0.992485	0.999814
9203.8	0.991909	0.991763	0.992256	0.992052	0.9922	0.991322	0.991807	0.991945	1.02199	0.992334	0.99966
9204.1	0.992101	0.991547	0.992487	0.992028	0.992263	0.991356	0.991718	0.991862	1.02356	0.992209	0.999609
9204.4	0.991976	0.991745	0.992399	0.992029	0.992303	0.991689	0.991748	0.992154	1.02488	0.991992	0.999405
9204.7	0.992191	0.991688	0.992547	0.992289	0.992309	0.991383	0.991845	0.991918	1.02634	0.991787	0.999425
9205	0.992086	0.991551	0.99261	0.992414	0.992342	0.991702	0.991931	0.99228	1.02768	0.991667	0.999216
9205.3	0.99214	0.991785	0.99254	0.992227	0.99232	0.991365	0.991715	0.991989	1.02891	0.991532	0.999116
9205.6	0.992267	0.991617	0.992647	0.992227	0.992337	0.991582	0.991846	0.992376	1.03016	0.991292	0.999005
9205.91	0.992271	0.991785	0.992567	0.992211	0.992378	0.991397	0.991885	0.992116	1.03117	0.99112	0.998928
9206.21	0.992336	0.991667	0.992759	0.992385	0.992344	0.991532	0.991977	0.992162	1.03234	0.99098	0.998836
9206.52	0.992225	0.991839	0.992559	0.992292	0.992449	0.991641	0.992031	0.992222	1.03324	0.990756	0.998691
9206.81	0.992323	0.991625	0.992705	0.992454	0.992495	0.991567	0.991832	0.992244	1.03429	0.990643	0.998638
9207.1	0.992245	0.99179	0.992591	0.992365	0.99245	0.991535	0.992102	0.992333	1.03499	0.990471	0.998423
9207.41	0.992414	0.991753	0.992686	0.992437	0.992546	0.99148	0.991922	0.992213	1.03584	0.990304	0.998289
9207.72	0.992363	0.991847	0.992729	0.992545	0.992566	0.99179	0.992086	0.992468	1.03649	0.990153	0.998184
9208.03	0.992459	0.991934	0.992805	0.992382	0.992458	0.991527	0.992003	0.992387	1.03716	0.989988	0.998098
9208.34	0.992388	0.991846	0.992882	0.992464	0.992549	0.991822	0.992018	0.992661	1.03776	0.989865	0.997926
9208.66	0.992442	0.992007	0.99277	0.992493	0.992569	0.99151	0.992229	0.992501	1.03813	0.98978	0.997819
9208.97	0.99247	0.991873	0.99288	0.99266	0.992671	0.991835	0.992189	0.992648	1.0387	0.989738	0.997799
9209.27	0.992503	0.992112	0.992715	0.992604	0.992691	0.991742	0.992235	0.992586	1.03901	0.989599	0.997549
9209.57	0.992763	0.991837	0.993046	0.992682	0.992708	0.991801	0.992084	0.992625	1.03931	0.989518	0.997455
9209.87	0.992643	0.992039	0.992866	0.992694	0.992663	0.991826	0.992325	0.992749	1.03946	0.989441	0.997296
9210.17	0.992794	0.991867	0.993042	0.992621	0.992681	0.991904	0.992124	0.992913	1.03973	0.989427	0.997181
9210.47	0.992599	0.992099	0.993021	0.992797	0.992622	0.991961	0.992239	0.993028	1.03984	0.989328	0.997015
9210.79	0.99261	0.992013	0.992893	0.992625	0.992721	0.991792	0.992257	0.992905	1.03996	0.989278	0.996904
9211.11	0.992839	0.992132	0.993048	0.99286	0.992813	0.992042	0.992582	0.992903	1.04005	0.989265	0.99681
9211.42	0.992853	0.992309	0.992958	0.992858	0.992747	0.991789	0.992405	0.992791	1.04008	0.989324	0.996603
9211.72	0.992952	0.992211	0.993073	0.99303	0.992847	0.992065	0.992359	0.993071	1.04019	0.989448	0.996585
9212.03	0.992891	0.992552	0.992909	0.992933	0.992828	0.991822	0.992462	0.993093	1.04003	0.989507	0.996363
9212.33	0.992984	0.992351	0.993113	0.993059	0.992878	0.99205	0.992501	0.993133	1.04009	0.989615	0.996195
9212.62	0.992853	0.992503	0.992943	0.99311	0.992842	0.992089	0.992873	0.993078	1.03989	0.98977	0.996142
9212.92	0.993136	0.992484	0.993129	0.993178	0.992905	0.992063	0.992547	0.993038	1.03985	0.989905	0.996065
9213.23	0.992974	0.992575	0.993009	0.993153	0.992879	0.99236	0.992773	0.99328	1.03962	0.989983	0.99597
9213.54	0.993208	0.992574	0.993014	0.993166	0.992802	0.992164	0.992651	0.993027	1.0395	0.990151	0.99575
9213.85	0.993171	0.9927	0.993181	0.993212	0.99293	0.992434	0.992865	0.993341	1.0393	0.990356	0.995545
9214.14	0.993214	0.992747	0.993184	0.9932	0.992944	0.992257	0.992785	0.99333	1.03904	0.990575	0.995451
9214.44	0.993225	0.992704	0.993315	0.993312	0.992895	0.992561	0.992998	0.993476	1.0388	0.990908	0.995409
9214.74	0.993227	0.992892	0.993186	0.993287	0.992884	0.992325	0.992877	0.993344	1.03839	0.991202	0.995339
9215.06	0.993351	0.992796	0.993376	0.993433	0.992997	0.992664	0.992859	0.993562	1.03815	0.991468	0.995217
9215.37	0.993405	0.993062	0.993248	0.993488	0.993023	0.992598	0.99299	0.993596	1.03776	0.991791	0.995085
9215.69	0.99358	0.992946	0.993487	0.993654	0.993076	0.992648	0.992931	0.993647	1.03749	0.992171	0.994968
9216	0.993415	0.993154	0.993419	0.993619	0.993093	0.992634	0.993096	0.993634	1.03699	0.992415	0.994902
9216.31	0.993713	0.993097	0.993553	0.993613	0.993208	0.992661	0.99323	0.993537	1.03657	0.992815	0.994699
9216.61	0.993665	0.993219	0.993583	0.993733	0.993334	0.992953	0.993441	0.99378	1.03611	0.993253	0.994654
9216.91	0.993811	0.993355	0.993542	0.993781	0.993229	0.992857	0.993324	0.993744	1.03554	0.993539	0.994522
9217.21	0.993818	0.99333	0.993625	0.993872	0.993304	0.993114	0.993479	0.994099	1.03502	0.993949	0.994528
9217.51	0.993807	0.993497	0.993607	0.993884	0.993453	0.99286	0.993428	0.993943	1.03441	0.994417	0.99433
9217.81	0.994059	0.99343	0.993888	0.993993	0.993404	0.9933	0.99348	0.994127	1.03386	0.9948	0.994299
9218.14	0.994048	0.993801	0.993842	0.993965	0.993464	0.993102	0.993644	0.993964	1.03309	0.995219	0.994113
9218.46	0.994316	0.993553	0.994037	0.994355	0.993581	0.993302	0.993568	0.994164	1.03252	0.995689	0.994095
9218.77	0.994187	0.993899	0.99397	0.994209	0.993667	0.993434	0.993808	0.994222	1.03171	0.996094	0.994042
9219.06	0.994344	0.993837	0.994118	0.994314	0.993707	0.993317	0.99381	0.994267	1.03104	0.996532	0.994014
9219.36	0.99425	0.993958	0.994123	0.99435	0.993765	0.993571	0.993852	0.994506	1.03024	0.996938	0.993918
9219.65	0.994477	0.993847	0.99432	0.994384	0.99376	0.993363	0.993864	0.994423	1.02944	0.997424	0.993785
9219.95	0.994581	0.993981	0.994333	0.994457	0.99386	0.993849	0.99406	0.994818	1.0286	0.997925	0.99372
9220.26	0.994635	0.994173	0.99441	0.99452	0.993929	0.993545	0.994018	0.994576	1.02759	0.998347	0.993732
9220.57	0.994757	0.994139	0.994748	0.994769	0.994144	0.993917	0.994071	0.994868	1.02665	0.998793	0.993722
9220.88	0.994904	0.994445	0.994679	0.994769	0.994209	0.993778	0.994213	0.994832	1.02559	0.999214	0.99359
9221.19	0.995074	0.994375	0.994907	0.994925	0.994278	0.994134	0.994329	0.995047	1.02461	0.999738	0.993636
9221.49	0.995012	0.994597	0.99484	0.994946	0.994404	0.993986	0.994388	0.995057	1.0234	1.00013	0.993595
9221.78	0.995212	0.994432	0.995083	0.995092	0.994554	0.994002	0.994283	0.99524	1.02242	1.00062	0.993549
9222.09	0.995177	0.994831	0.9951	0.995175	0.994653	0.994164	0.994741	0.995396	1.02121	1.00113	0.993526
9222.41	0.995459	0.994802	0.99532	0.995249	0.994669	0.994225	0.994583	0.995439	1.02006	1.00158	0.993479
9222.72	0.995426	0.995071	0.995438	0.995461	0.994816	0.994457	0.994857	0.995726	1.01894	1.00198	0.993443
9223.03	0.995729	0.995205	0.995501	0.995554	0.994964	0.994313	0.994833	0.995559	1.01778	1.00241	0.993493
9223.34	0.995795	0.995173	0.995669	0.995649	0.995044	0.994748	0.995064	0.995975	1.01664	1.00287	0.993514
9223.66	0.995886	0.995287	0.995644	0.995756	0.995149	0.994645	0.995057	0.995772	1.01526	1.00326	0.993415
9223.96	0.996104	0.995395	0.996009	0.995791	0.9953	0.994895	0.995061	0.996208	1.01406	1.0036	0.99348
9224.26	0.996097	0.995742	0.995927	0.995968	0.995411	0.995078	0.995425	0.996155	1.01263	1.00396	0.993449
9224.56	0.996343	0.995662	0.996276	0.996145	0.995578	0.995173	0.995583	0.996262	1.01141	1.00423	0.993495
9224.86	0.996368	0.995904	0.996164	0.996399	0.995667	0.995362	0.995796	0.996468	1.01005	1.0045	0.993455
9225.17	0.99666	0.995881	0.996427	0.996466	0.995836	0.995588	0.995512	0.996451	1.00878	1.00483	0.993457
9225.49	0.996626	0.996155	0.996531	0.996507	0.995958	0.995688	0.995934	0.996787	1.00749	1.00518	0.993462
9225.81	0.996848	0.996295	0.996724	0.996701	0.996153	0.995621	0.995985	0.996807	1.00619	1.00544	0.993472
9226.11	0.996959	0.996493	0.996842	0.996846	0.99624	0.995975	0.99627	0.996973	1.0049	1.00566	0.99349
9226.42	0.997103	0.996578	0.996862	0.996866	0.996432	0.99582	0.99622	0.996975	1.00352	1.00584	0.993466
9226.71	0.997253	0.996583	0.997204	0.997025	0.996488	0.996275	0.996374	0.99725	1.00228	1.00603	0.993509
9227	0.997342	0.996883	0.997131	0.996958	0.996661	0.996113	0.996539	0.997198	1.00095	1.00614	0.993496
9227.31	0.997459	0.996812	0.997366	0.997371	0.99682	0.996473	0.99659	0.997186	0.999617	1.00632	0.993619
9227.63	0.99767	0.997135	0.997296	0.997425	0.99693	0.996488	0.996789	0.997396	0.998145	1.00639	0.993559
9227.94	0.997791	0.997128	0.997651	0.997576	0.997083	0.99661	0.996832	0.997558	0.996875	1.00643	0.993512
9228.26	0.997673	0.997262	0.997753	0.997866	0.99728	0.996792	0.997152	0.997796	0.995561	1.00647	0.993593
9228.57	0.997986	0.99741	0.99801	0.997885	0.997365	0.996896	0.99711	0.997686	0.994328	1.00654	0.99369
9228.85	0.998083	0.997521	0.998158	0.997923	0.997565	0.997062	0.997373	0.998071	0.993117	1.0065	0.993777
9229.15	0.998149	0.997801	0.998251	0.998056	0.997675	0.997065	0.997258	0.997953	0.991909	1.00644	0.993779
9229.45	0.998289	0.99784	0.998355	0.998174	0.997797	0.997503	0.997401	0.998354	0.990814	1.00638	0.993793
9229.77	0.998438	0.998209	0.998388	0.99822	0.997988	0.997411	0.997584	0.998206	0.989557	1.00619	0.993794
9230.07	0.998537	0.998153	0.99874	0.998587	0.99804	0.997756	0.997799	0.998558	0.988421	1.00615	0.993735
9230.38	0.998464	0.998451	0.998634	0.998456	0.998134	0.997811	0.998049	0.998694	0.987225	1.00608	0.993794
9230.69	0.998927	0.998392	0.998877	0.998656	0.998366	0.997972	0.998062	0.998763	0.986172	1.00593	0.993927
9231.01	0.998852	0.99872	0.99885	0.998817	0.998514	0.998113	0.998312	0.99893	0.984954	1.00571	0.993842
9231.32	0.999074	0.998773	0.999043	0.998879	0.998575	0.998298	0.998321	0.998843	0.983964	1.0056	0.993895
9231.62	0.999189	0.998966	0.999222	0.999184	0.998902	0.998493	0.998627	0.999045	0.982895	1.0055	0.99406
9231.93	0.999411	0.99911	0.999413	0.999143	0.998931	0.998399	0.9987	0.998912	0.98179	1.00528	0.994062
9232.24	0.999497	0.999105	0.999785	0.999459	0.999031	0.998859	0.998885	0.999248	0.980811	1.00507	0.994111
9232.55	0.999581	0.999258	0.999588	0.999545	0.999192	0.998557	0.998864	0.999173	0.979807	1.00478	0.994043
9232.87	0.999772	0.999312	0.99984	0.999701	0.9994	0.999	0.999	0.999509	0.979005	1.00456	0.994195
9233.18	0.999736	0.999608	0.999623	0.999701	0.999432	0.998883	0.999306	0.999633	0.978124	1.00431	0.994161
9233.49	1.00007	0.999612	1.00002	0.99998	0.999625	0.999165	0.999261	0.999713	0.977407	1.00407	0.994258
9233.78	0.999947	0.999855	1.00004	0.999893	0.999643	0.999348	0.999587	0.999846	0.976528	1.0038	0.994364
9234.07	1.00008	0.999742	1.00034	1.00004	0.999815	0.999438	0.999539	0.999893	0.975732	1.00354	0.994363
9234.37	1.00017	0.999947	1.00038	1.00027	0.999958	0.999681	0.999858	1.0001	0.974992	1.00327	0.994439
9234.68	1.00049	1.00008	1.00056	1.00032	1.00002	0.99959	0.999759	0.999945	0.97434	1.003	0.994436
9234.99	1.00054	1.00021	1.00073	1.00051	1.00015	0.999906	1.00002	1.00025	0.973722	1.00275	0.994556
9235.32	1.00065	1.00042	1.00075	1.00053	1.00035	0.999914	1.00004	1.00017	0.973119	1.00244	0.994566
9235.63	1.00072	1.00043	1.00102	1.00073	1.00044	1.00027	1.00024	1.0005	0.972602	1.00219	0.994581
9235.94	1.00084	1.00073	1.00086	1.00072	1.00052	1.00018	1.00031	1.00036	0.972025	1.00195	0.994686
9236.24	1.001	1.00059	1.00121	1.001	1.00071	1.00032	1.00042	1.00056	0.971667	1.00171	0.994759
9236.54	1.00097	1.0009	1.00109	1.00112	1.0008	1.00039	1.00043	1.00058	0.971128	1.0014	0.994808
9236.83	1.00112	1.0008	1.00136	1.00124	1.00089	1.00051	1.00039	1.00073	0.970873	1.00112	0.994821
9237.14	1.0012	1.00106	1.00143	1.00129	1.00098	1.00055	1.00074	1.00087	0.970481	1.00084	0.995048
9237.44	1.00142	1.00103	1.00158	1.0014	1.0011	1.00063	1.00074	1.0009	0.970301	1.00066	0.995001
9237.75	1.00144	1.00126	1.00158	1.00157	1.00129	1.00099	1.00095	1.0011	0.970085	1.00049	0.995133
9238.07	1.00154	1.00142	1.00167	1.00155	1.0013	1.00085	1.00091	1.00088	0.96991	1.00027	0.995125
9238.39	1.00173	1.00151	1.00171	1.00164	1.00135	1.00134	1.00108	1.00114	0.969859	1.00005	0.995329
9238.69	1.00174	1.00162	1.00176	1.00162	1.00146	1.00126	1.00127	1.0012	0.969757	0.99978	0.995386
9239	1.00185	1.00155	1.00201	1.00192	1.00156	1.00153	1.00135	1.0014	0.9698	0.999686	0.99552
9239.31	1.0019	1.00186	1.00196	1.00201	1.00164	1.00147	1.0016	1.00147	0.969703	0.999494	0.995528
9239.62	1.00207	1.00177	1.00226	1.00216	1.00186	1.00169	1.0015	1.00176	0.969826	0.999325	0.9956
9239.93	1.00207	1.00193	1.00222	1.00223	1.00193	1.0018	1.00164	1.00177	0.969839	0.999213	0.995678
9240.25	1.00231	1.00184	1.00259	1.00229	1.00201	1.0017	1.00162	1.00179	0.97009	0.999152	0.995871
9240.57	1.00232	1.00207	1.00263	1.00236	1.00212	1.00199	1.0019	1.00201	0.970188	0.999059	0.995954
9240.87	1.00247	1.00213	1.00273	1.00243	1.0022	1.00184	1.00193	1.00192	0.970386	0.998999	0.996118
9241.16	1.00246	1.00222	1.00285	1.00267	1.0023	1.00223	1.00199	1.00219	0.970626	0.998905	0.996249
9241.45	1.00262	1.00244	1.00275	1.00253	1.00239	1.00211	1.00211	1.00208	0.970801	0.998811	0.996353
9241.75	1.0027	1.00244	1.00304	1.0029	1.00257	1.00241	1.00215	1.0023	0.971118	0.998821	0.996421
9242.05	1.00272	1.00272	1.00295	1.00282	1.00259	1.00248	1.00235	1.00224	0.971343	0.998827	0.996416
9242.37	1.00293	1.00266	1.0032	1.00293	1.00256	1.0026	1.00236	1.00244	0.971735	0.998771	0.996642
9242.7	1.00286	1.00291	1.00301	1.00306	1.00274	1.00267	1.0025	1.00247	0.971948	0.998796	0.996652
9243.01	1.00313	1.00296	1.00328	1.00309	1.00282	1.0028	1.00249	1.00246	0.97233	0.998885	0.996893
9243.32	1.00312	1.00321	1.00315	1.00324	1.0029	1.00315	1.0029	1.0026	0.972593	0.998855	0.996962
9243.62	1.00323	1.0031	1.00336	1.00321	1.00309	1.00295	1.00259	1.00252	0.972918	0.99888	0.997057
9243.91	1.00318	1.00313	1.00336	1.0034	1.00315	1.00342	1.00285	1.00288	0.973238	0.998919	0.997168
9244.21	1.00342	1.00333	1.00347	1.00342	1.00319	1.00316	1.00282	1.00275	0.973515	0.998995	0.997329
9244.52	1.00337	1.00337	1.0037	1.00361	1.00341	1.00352	1.00303	1.00295	0.973826	0.999092	0.997454
9244.83	1.00339	1.00353	1.00353	1.00355	1.00342	1.00337	1.00308	1.00293	0.974049	0.999157	0.997443
9245.14	1.00368	1.00344	1.00377	1.00386	1.00351	1.00378	1.00315	1.00302	0.974443	0.999314	0.997597
9245.45	1.00352	1.00376	1.00369	1.00388	1.00353	1.00378	1.00326	1.00296	0.974647	0.999476	0.997667
9245.77	1.00382	1.00362	1.00387	1.004	1.00365	1.00386	1.00331	1.00313	0.97496	0.999597	0.997809
9246.09	1.0037	1.00382	1.00381	1.00388	1.00364	1.00403	1.00366	1.00326	0.975172	0.999723	0.997896
9246.4	1.00378	1.00385	1.00394	1.00411	1.00375	1.00393	1.00359	1.00322	0.975514	0.999774	0.99808
9246.7	1.00392	1.00407	1.00398	1.0042	1.00383	1.00434	1.00368	1.00346	0.975714	0.999906	0.998175
9247.01	1.00408	1.00418	1.00403	1.00425	1.00392	1.00414	1.00372	1.00329	0.975885	1.00003	0.998201
9247.33	1.00402	1.00424	1.00421	1.00433	1.00398	1.00428	1.00401	1.00362	0.976119	1.00023	0.998395
9247.64	1.00416	1.00446	1.00418	1.00428	1.00405	1.0043	1.00382	1.00353	0.976245	1.00046	0.998443
9247.95	1.00427	1.00442	1.00441	1.00454	1.00414	1.00441	1.00387	1.00384	0.976543	1.00066	0.998699
9248.26	1.00422	1.00473	1.00422	1.00449	1.00433	1.0045	1.00414	1.00367	0.976637	1.0008	0.998604
9248.55	1.00443	1.00451	1.00444	1.00451	1.00436	1.00457	1.00422	1.00383	0.976883	1.00094	0.998711
9248.84	1.00436	1.0047	1.0043	1.00466	1.0044	1.00472	1.00427	1.00391	0.976996	1.00108	0.998801
9249.13	1.00455	1.00468	1.0044	1.00468	1.00449	1.00477	1.00426	1.00391	0.977216	1.00129	0.998951
9249.44	1.0044	1.00497	1.00441	1.00477	1.0046	1.00475	1.00438	1.00411	0.97734	1.00143	0.999052
9249.75	1.0046	1.00487	1.00462	1.00492	1.00461	1.00478	1.00444	1.00396	0.977502	1.00162	0.99904
9250.07	1.0046	1.00495	1.00463	1.00493	1.00472	1.00512	1.00466	1.00417	0.977712	1.00181	0.999275
9250.39	1.0047	1.00527	1.00453	1.00484	1.00479	1.00487	1.00465	1.00405	0.977871	1.00195	0.999324
9250.69	1.00481	1.00517	1.00479	1.00497	1.00488	1.00523	1.00469	1.00438	0.978079	1.00218	0.999438
9250.99	1.00476	1.00535	1.00464	1.00493	1.00494	1.00515	1.00475	1.00432	0.97819	1.00231	0.999366
9251.29	1.00494	1.00515	1.00494	1.00506	1.00502	1.00535	1.00465	1.00449	0.978452	1.00244	0.999585
9251.59	1.00483	1.00529	1.00475	1.00516	1.00499	1.00531	1.00485	1.00438	0.978559	1.00258	0.999659
9251.9	1.00501	1.00519	1.00506	1.00523	1.00508	1.00535	1.00481	1.00441	0.97885	1.0027	0.999693
9252.2	1.00508	1.00544	1.00479	1.00537	1.00514	1.00548	1.00508	1.00454	0.979011	1.00287	0.999733
9252.51	1.00517	1.00549	1.005	1.00536	1.00522	1.0053	1.00511	1.00449	0.979247	1.00304	0.999936
9252.83	1.00521	1.00559	1.00513	1.00549	1.00535	1.00563	1.00532	1.0047	0.979444	1.00322	0.999995
9253.15	1.00524	1.0056	1.00503	1.00536	1.00538	1.00542	1.00523	1.00455	0.979669	1.00342	1.00009
9253.46	1.00528	1.0056	1.00519	1.00549	1.00551	1.00576	1.0054	1.00487	0.979926	1.00363	1.00019
9253.77	1.00526	1.00568	1.00503	1.00556	1.00555	1.00554	1.00537	1.00476	0.980098	1.00372	1.00027
9254.08	1.00538	1.00556	1.0054	1.00571	1.00563	1.00576	1.00528	1.00499	0.980409	1.00384	1.00041
9254.4	1.0054	1.00585	1.00518	1.0056	1.00578	1.00589	1.0055	1.00474	0.980557	1.00396	1.0004
9254.72	1.00555	1.0057	1.0055	1.00563	1.00578	1.00615	1.00546	1.00492	0.980825	1.00409	1.00051
9255.04	1.00544	1.0059	1.00525	1.00565	1.00582	1.00615	1.0057	1.00499	0.981001	1.00417	1.00061
9255.36	1.00563	1.00574	1.00553	1.00579	1.00578	1.00613	1.00543	1.005	0.981362	1.0043	1.00068
9255.67	1.00555	1.00606	1.00542	1.00589	1.00598	1.0062	1.00569	1.00523	0.981545	1.00448	1.00082
9255.96	1.00566	1.00614	1.00549	1.00576	1.00604	1.006	1.00562	1.00507	0.981771	1.00466	1.00086
9256.25	1.00573	1.00615	1.0055	1.00589	1.00603	1.00632	1.00575	1.00519	0.981976	1.00471	1.00096
9256.54	1.00576	1.00622	1.00547	1.00586	1.00609	1.00608	1.00579	1.00514	0.982223	1.0048	1.001
9256.84	1.00573	1.00609	1.00567	1.00597	1.00613	1.00629	1.00588	1.00531	0.982517	1.00498	1.00103
9257.16	1.00572	1.00632	1.00547	1.00599	1.00621	1.00609	1.00593	1.00523	0.982711	1.00503	1.00107
9257.47	1.00591	1.00611	1.00587	1.00606	1.00617	1.00632	1.00585	1.00525	0.983081	1.00506	1.0011
9257.78	1.00573	1.00638	1.00563	1.00602	1.00631	1.00638	1.00602	1.00539	0.98325	1.00511	1.00117
9258.09	1.0059	1.0062	1.0058	1.00609	1.00635	1.00636	1.00591	1.0054	0.983613	1.00526	1.00131
9258.39	1.00579	1.00645	1.00566	1.00605	1.00636	1.0064	1.00602	1.00555	0.983843	1.0054	1.00142
9258.69	1.00587	1.00631	1.0058	1.00607	1.00642	1.00632	1.0061	1.00538	0.984135	1.0055	1.00148
9258.99	1.00576	1.00643	1.0058	1.00622	1.00649	1.00662	1.0061	1.0056	0.984369	1.00554	1.00145
9259.31	1.00589	1.00648	1.00581	1.00615	1.00654	1.00627	1.00612	1.00544	0.984647	1.00568	1.00144
9259.62	1.00602	1.00635	1.00594	1.00629	1.00655	1.00659	1.00627	1.00571	0.984992	1.00579	1.00155
9259.94	1.00599	1.00659	1.00586	1.00621	1.0066	1.00644	1.00618	1.00549	0.985246	1.00574	1.00161
9260.25	1.00605	1.00629	1.00613	1.00638	1.00663	1.00664	1.0062	1.00571	0.985689	1.00575	1.00178
9260.57	1.00599	1.0066	1.00588	1.00637	1.00659	1.00651	1.00629	1.00572	0.985893	1.00581	1.0017
9260.88	1.0061	1.00638	1.00608	1.00632	1.00664	1.00667	1.00626	1.00577	0.986352	1.00595	1.00182
9261.17	1.00598	1.00661	1.00593	1.00635	1.00661	1.0067	1.00633	1.00575	0.986663	1.00595	1.00182
9261.48	1.00618	1.00644	1.00618	1.00632	1.00667	1.00656	1.00607	1.0056	0.987018	1.00593	1.00187
9261.79	1.00607	1.00665	1.00603	1.00634	1.00669	1.00681	1.00636	1.00584	0.987331	1.00595	1.002
9262.1	1.00615	1.00666	1.00606	1.00632	1.00661	1.00655	1.00615	1.00564	0.987721	1.00604	1.00204
9262.42	1.00611	1.00665	1.00619	1.00639	1.00673	1.00699	1.00633	1.00594	0.98811	1.00602	1.00217
9262.74	1.00612	1.00669	1.00596	1.00627	1.00678	1.00663	1.00626	1.00571	0.988467	1.00598	1.0021
9263.05	1.00618	1.00659	1.006	1.00626	1.0068	1.00699	1.00634	1.00582	0.988911	1.00595	1.00225
9263.33	1.00597	1.00658	1.00596	1.00617	1.00676	1.00665	1.00643	1.00562	0.989204	1.00582	1.00222
9263.64	1.00596	1.00639	1.00616	1.0062	1.00677	1.00677	1.00642	1.00562	0.989725	1.00585	1.00227
9263.93	1.00592	1.0066	1.00597	1.00606	1.00677	1.00672	1.00649	1.0057	0.990128	1.00586	1.00235
9264.25	1.00595	1.00652	1.00614	1.00616	1.00684	1.00663	1.00631	1.00571	0.990608	1.0058	1.0024
9264.56	1.00582	1.0067	1.00598	1.00612	1.00681	1.00672	1.00645	1.00579	0.991017	1.00572	1.00241
9264.89	1.00594	1.00662	1.00603	1.00617	1.00678	1.00652	1.00632	1.00568	0.991571	1.0056	1.00249
9265.2	1.00601	1.00668	1.00615	1.00631	1.00679	1.0069	1.00658	1.0058	0.992033	1.00548	1.0026
9265.5	1.00593	1.0067	1.00606	1.00616	1.00678	1.0066	1.00638	1.00559	0.992458	1.00538	1.00251
9265.81	1.00602	1.00648	1.0062	1.00618	1.0067	1.00687	1.00628	1.00576	0.99299	1.00523	1.00267
9266.1	1.00579	1.00672	1.0059	1.00615	1.0067	1.00664	1.00618	1.00556	0.993429	1.00508	1.00262
9266.41	1.00583	1.00649	1.00615	1.00624	1.00675	1.00674	1.0062	1.00567	0.993932	1.005	1.00264
9266.73	1.00581	1.00669	1.00588	1.00612	1.00659	1.00663	1.00625	1.0055	0.994297	1.00486	1.00259
9267.04	1.00593	1.00641	1.00613	1.00614	1.00658	1.00673	1.0062	1.00564	0.99488	1.00472	1.00274
9267.36	1.0058	1.00665	1.00593	1.00597	1.00661	1.00677	1.00634	1.00555	0.995249	1.00456	1.0027
9267.68	1.00576	1.00655	1.00596	1.00601	1.00649	1.00638	1.00615	1.00538	0.995735	1.00443	1.00274
9268	1.00573	1.00648	1.00581	1.00601	1.00654	1.00668	1.00629	1.00557	0.996199	1.00427	1.0028
9268.3	1.00571	1.0065	1.00577	1.00584	1.00634	1.00639	1.00609	1.00527	0.996591	1.0041	1.00284
9268.61	1.00561	1.0062	1.00586	1.00587	1.00638	1.00673	1.00605	1.00553	0.99704	1.00389	1.003
9268.9	1.00551	1.00648	1.00578	1.0057	1.0064	1.00642	1.00604	1.00526	0.997374	1.00365	1.00286
9269.21	1.00552	1.00615	1.00577	1.00581	1.00632	1.00651	1.006	1.00533	0.997844	1.0035	1.00299
9269.52	1.00545	1.00638	1.00546	1.00572	1.00637	1.00637	1.00596	1.0051	0.998155	1.00328	1.00288
9269.85	1.00556	1.00626	1.00561	1.00567	1.00631	1.00644	1.00593	1.00519	0.998589	1.0031	1.00291
9270.16	1.00536	1.00644	1.00532	1.00561	1.00616	1.00646	1.00592	1.00513	0.998932	1.00289	1.00293
9270.47	1.00539	1.00604	1.00538	1.0055	1.00611	1.00628	1.00578	1.00491	0.9994	1.00263	1.00295
9270.76	1.00515	1.00614	1.00528	1.00544	1.00605	1.0064	1.00582	1.00503	0.999685	1.00241	1.00307
9271.06	1.00519	1.00598	1.00529	1.00531	1.00598	1.00616	1.0056	1.00479	1.00004	1.00221	1.00296
9271.36	1.00507	1.00591	1.00531	1.0053	1.0059	1.00646	1.00577	1.00485	1.00043	1.002	1.00305
9271.66	1.00489	1.00599	1.00499	1.00517	1.00573	1.00616	1.00548	1.00463	1.00075	1.00175	1.00289
9271.98	1.00494	1.00568	1.0052	1.00518	1.00563	1.0062	1.00553	1.00488	1.00115	1.00148	1.00309
9272.3	1.00483	1.00579	1.00485	1.00504	1.0056	1.00596	1.0055	1.00469	1.00143	1.00121	1.00307
9272.61	1.00489	1.00555	1.00494	1.00504	1.00549	1.00605	1.00543	1.00471	1.00181	1.00106	1.00306
9272.92	1.00459	1.00573	1.00464	1.00489	1.0055	1.0058	1.00545	1.00444	1.00205	1.00079	1.00305
9273.22	1.00466	1.00546	1.00474	1.00483	1.00536	1.00571	1.00533	1.00435	1.00246	1.00055	1.0031
9273.52	1.00444	1.00558	1.00443	1.00473	1.00524	1.00583	1.00527	1.00429	1.00262	1.00034	1.00297
9273.83	1.00441	1.00531	1.00455	1.00456	1.00514	1.00547	1.00494	1.00407	1.00293	1.0001	1.00295
9274.15	1.0042	1.00525	1.00439	1.00455	1.00499	1.00578	1.00503	1.00411	1.00325	0.999823	1.00304
9274.46	1.00417	1.00526	1.00422	1.0044	1.00489	1.00538	1.00487	1.00395	1.00352	0.999602	1.00302
9274.79	1.00422	1.00506	1.00433	1.00443	1.00496	1.00546	1.0049	1.0041	1.00392	0.999432	1.00304
9275.1	1.00407	1.00517	1.00396	1.00424	1.0048	1.00512	1.00474	1.0037	1.00415	0.999184	1.00292
9275.42	1.00405	1.00485	1.00421	1.00421	1.00458	1.00532	1.00463	1.00392	1.00451	0.998966	1.00304
9275.73	1.00374	1.00488	1.0037	1.00395	1.00459	1.00505	1.00459	1.00374	1.00469	0.998717	1.00303
9276.03	1.0038	1.00459	1.00392	1.00399	1.00447	1.00517	1.00445	1.00361	1.00504	0.998519	1.003
9276.33	1.00354	1.00473	1.00367	1.00391	1.00441	1.00494	1.00437	1.00345	1.00517	0.998377	1.00299
9276.64	1.00367	1.00443	1.00356	1.00376	1.00424	1.00461	1.00424	1.0032	1.00545	0.9982	1.00299
9276.96	1.00335	1.00436	1.00336	1.00378	1.0041	1.00479	1.00421	1.0033	1.00568	0.998025	1.00301
9277.28	1.00338	1.00415	1.00327	1.00343	1.00396	1.00445	1.00383	1.00297	1.00594	0.99793	1.00288
9277.59	1.00337	1.00402	1.0032	1.00343	1.00382	1.00467	1.00385	1.00306	1.00621	0.997834	1.00294
9277.9	1.00311	1.00412	1.00294	1.00312	1.00372	1.00429	1.00373	1.00282	1.00637	0.997609	1.00288
9278.2	1.00306	1.00375	1.00314	1.00315	1.00363	1.00437	1.00362	1.00288	1.00667	0.997472	1.00299
9278.5	1.00273	1.00389	1.00271	1.00302	1.00343	1.00401	1.00374	1.00259	1.00686	0.997367	1.00285
9278.8	1.0028	1.00362	1.00279	1.00298	1.00336	1.0041	1.00345	1.00256	1.00716	0.997267	1.00287
9279.1	1.00253	1.00368	1.00248	1.00278	1.00327	1.00395	1.00345	1.00255	1.00729	0.997061	1.00281
9279.41	1.00255	1.00337	1.00251	1.00279	1.00308	1.00385	1.00322	1.00238	1.00763	0.997004	1.00287
9279.73	1.00237	1.00342	1.00225	1.00266	1.00291	1.00396	1.00323	1.00244	1.00778	0.996917	1.00277
9280.04	1.00236	1.00311	1.00219	1.0025	1.00273	1.00364	1.00295	1.00203	1.00803	0.996823	1.00276
9280.34	1.00227	1.00322	1.00221	1.0024	1.00271	1.00371	1.00295	1.00214	1.00826	0.99677	1.00272
9280.65	1.00204	1.00321	1.00193	1.00215	1.0026	1.00327	1.00268	1.00166	1.00843	0.996788	1.00264
9280.95	1.002	1.00302	1.00183	1.0022	1.0025	1.00338	1.00262	1.00178	1.00869	0.996734	1.0026
9281.26	1.00185	1.00305	1.00139	1.00202	1.00231	1.00311	1.00268	1.00162	1.00884	0.99664	1.00247
9281.58	1.00176	1.00271	1.00153	1.0021	1.00211	1.00314	1.00259	1.0017	1.00918	0.996637	1.00252
9281.9	1.00148	1.00279	1.00113	1.00181	1.00198	1.00301	1.00254	1.00137	1.00929	0.996644	1.0025
9282.21	1.00163	1.00244	1.00123	1.00173	1.00192	1.00297	1.0023	1.00134	1.00962	0.99667	1.00251
9282.53	1.00127	1.00257	1.00098	1.00161	1.00176	1.00282	1.0024	1.00113	1.00982	0.996689	1.00243
9282.85	1.00128	1.00244	1.001	1.00156	1.00156	1.00259	1.00201	1.00087	1.01009	0.99674	1.0024
9283.16	1.00113	1.00235	1.0008	1.00146	1.00149	1.00278	1.00197	1.00101	1.01027	0.996768	1.00238
9283.46	1.00101	1.00234	1.00051	1.00137	1.00136	1.00225	1.00183	1.00073	1.01051	0.996829	1.00235
9283.76	1.00092	1.00204	1.00054	1.00125	1.00126	1.00263	1.00175	1.00076	1.01075	0.996909	1.00238
9284.07	1.00084	1.0022	1.00028	1.00099	1.0011	1.00238	1.00161	1.00039	1.01089	0.996891	1.00227
9284.39	1.0007	1.00188	1.00035	1.00118	1.00097	1.0024	1.00152	1.00047	1.01124	0.996973	1.00226
9284.7	1.00056	1.00202	0.999939	1.00098	1.00089	1.00216	1.00143	1.00027	1.01138	0.996967	1.00211
9285.02	1.0006	1.00186	1.00005	1.00083	1.00075	1.00212	1.00141	1.00021	1.01163	0.997027	1.00221
9285.34	1.00032	1.00174	0.99973	1.00064	1.0006	1.00207	1.00132	1.00017	1.01175	0.997143	1.00203
9285.65	1.00029	1.00142	0.999717	1.00047	1.00043	1.00174	1.00102	0.999976	1.01211	0.997229	1.00209
9285.95	1.00011	1.00152	0.99954	1.00044	1.00032	1.00191	1.00098	0.999962	1.01224	0.997311	1.00201
9286.25	1.00005	1.0013	0.999424	1.00023	1.00024	1.00158	1.00081	0.999599	1.01248	0.997374	1.0019
9286.57	1	1.00117	0.999395	1.00003	1.00014	1.00172	1.00077	0.999848	1.01269	0.997419	1.00198
9286.89	0.999772	1.00127	0.999177	0.999986	0.999938	1.00136	1.00051	0.999418	1.01288	0.997528	1.00188
9287.2	0.999847	1.00096	0.999254	1.00009	0.999876	1.00155	1.00035	0.999564	1.01316	0.997685	1.00186
9287.51	0.999665	1.00114	0.998887	0.99989	0.999704	1.00111	1.0003	0.999204	1.01329	0.997794	1.00172
9287.82	0.999716	1.00073	0.999031	0.999792	0.99961	1.00123	1.00028	0.999369	1.0136	0.997871	1.00169
9288.11	0.999383	1.00091	0.998624	0.999608	0.999477	1.00108	1.00013	0.999145	1.01366	0.997853	1.00161
9288.41	0.999456	1.00067	0.998748	0.9997	0.99939	1.00095	1.00004	0.998987	1.01389	0.997984	1.00167
9288.72	0.99932	1.00071	0.998375	0.999494	0.999366	1.00091	1.0001	0.998984	1.0141	0.998053	1.00159
9289.04	0.999257	1.00034	0.998515	0.999398	0.999226	1.00065	0.999921	0.998718	1.01434	0.998129	1.00158
9289.35	0.999209	1.00036	0.998428	0.999331	0.999035	1.00098	0.999922	0.99876	1.01451	0.99825	1.00142
9289.67	0.999111	1.00029	0.998175	0.999298	0.998958	1.00058	0.999675	0.998554	1.0147	0.998381	1.00142
9289.99	0.999043	1.00009	0.998172	0.999282	0.998956	1.00071	0.999692	0.998756	1.01492	0.998517	1.0015
9290.31	0.998931	1.00023	0.997978	0.999042	0.998824	1.00027	0.999631	0.998499	1.01508	0.998503	1.00136
9290.62	0.998883	0.999721	0.998171	0.999045	0.998678	1.00026	0.999512	0.9986	1.01535	0.998542	1.00137
9290.93	0.998656	1.00005	0.997778	0.998805	0.998642	1.00017	0.999413	0.998434	1.01543	0.998664	1.00131
9291.23	0.998773	0.999543	0.997911	0.998887	0.998511	1.00008	0.999303	0.998354	1.01567	0.998822	1.00138
9291.53	0.998564	0.99972	0.997694	0.99875	0.998372	0.999966	0.999235	0.998285	1.01584	0.998821	1.00129
9291.85	0.998478	0.999607	0.997745	0.998651	0.998349	0.999679	0.998864	0.998101	1.01607	0.998863	1.00118
9292.17	0.998382	0.999393	0.997587	0.998565	0.998285	0.99982	0.999054	0.998257	1.01621	0.998959	1.00113
9292.49	0.99833	0.999265	0.99748	0.998427	0.998194	0.999524	0.998883	0.997959	1.01638	0.999101	1.00113
9292.81	0.998245	0.999075	0.997501	0.998509	0.998164	0.999852	0.998917	0.998105	1.01656	0.999111	1.00107
9293.1	0.998203	0.999121	0.997376	0.99829	0.998085	0.999375	0.998674	0.997811	1.0167	0.999133	1.00098
9293.4	0.998249	0.998878	0.997362	0.998281	0.998009	0.999604	0.998575	0.99796	1.01694	0.999215	1.00098
9293.71	0.997994	0.999107	0.997163	0.998193	0.997835	0.99924	0.99845	0.997651	1.01698	0.999208	1.00089
9294.02	0.998066	0.998588	0.997328	0.998195	0.997784	0.999199	0.998319	0.997788	1.01719	0.999309	1.00091
9294.34	0.997895	0.99895	0.997014	0.998012	0.997835	0.999104	0.998446	0.997668	1.01727	0.999376	1.00086
9294.66	0.997946	0.998634	0.99719	0.998099	0.99763	0.99899	0.998206	0.997563	1.01749	0.999453	1.00087
9294.97	0.997837	0.998713	0.996944	0.998001	0.997508	0.999066	0.998356	0.997721	1.01753	0.999534	1.00082
9295.27	0.997866	0.998448	0.996935	0.997882	0.997534	0.998819	0.998222	0.997402	1.01763	0.999596	1.00079
9295.57	0.997796	0.998407	0.996926	0.997877	0.997461	0.99897	0.998152	0.997546	1.01774	0.99958	1.00068
9295.88	0.997511	0.99838	0.996787	0.99771	0.997348	0.998681	0.997902	0.99729	1.0178	0.999589	1.00067
9296.18	0.997619	0.998224	0.996798	0.997741	0.997326	0.998808	0.998049	0.997455	1.01788	0.999653	1.00073
9296.5	0.997507	0.998457	0.996572	0.997566	0.997235	0.998562	0.997801	0.997173	1.01775	0.999685	1.00055
9296.82	0.997502	0.998046	0.996718	0.997584	0.997259	0.998544	0.99773	0.997433	1.0178	0.999624	1.00057
9297.14	0.997377	0.998142	0.996566	0.997438	0.997007	0.998442	0.99785	0.997296	1.01759	0.999667	1.00052
9297.47	0.997456	0.997807	0.996757	0.997514	0.99702	0.998417	0.997577	0.997244	1.01769	0.999782	1.00054
9297.79	0.997336	0.99796	0.996528	0.997407	0.996994	0.998335	0.997621	0.997197	1.01754	0.999719	1.00054
9298.09	0.997324	0.997687	0.996638	0.99729	0.996905	0.997949	0.99759	0.996949	1.01759	0.999761	1.00053
9298.4	0.997173	0.997816	0.996491	0.99717	0.996833	0.998094	0.997589	0.997065	1.01755	0.999768	1.00043
9298.7	0.99725	0.997782	0.996456	0.997185	0.996816	0.997689	0.997379	0.996799	1.01748	0.999735	1.00044
9299	0.997202	0.997674	0.996511	0.997201	0.996793	0.997888	0.997525	0.997073	1.01744	0.999763	1.00049
9299.32	0.997054	0.99773	0.996348	0.99713	0.996754	0.997652	0.997425	0.996923	1.01731	0.999819	1.00029
9299.64	0.997029	0.997476	0.99638	0.997109	0.996773	0.997933	0.997268	0.996995	1.01724	0.999876	1.00039
9299.96	0.996965	0.997713	0.996202	0.997003	0.996642	0.997673	0.997284	0.996807	1.01697	0.99987	1.00034
9300.26	0.997067	0.997295	0.996371	0.997032	0.996614	0.997618	0.997216	0.996939	1.01687	0.999831	1.00032
9300.56	0.996822	0.99751	0.99603	0.996955	0.996518	0.997655	0.997202	0.996774	1.01662	0.999825	1.00027
9300.86	0.996904	0.997235	0.996181	0.996871	0.996423	0.997478	0.997055	0.996717	1.01643	0.999829	1.00017
9301.17	0.99674	0.997357	0.996065	0.996949	0.996431	0.997611	0.997035	0.996848	1.01615	0.999804	1.00012
9301.48	0.996741	0.997212	0.996022	0.99676	0.996456	0.997185	0.997058	0.996504	1.01591	0.999832	1.00009
9301.79	0.996728	0.997232	0.996023	0.996845	0.996391	0.997526	0.997167	0.996718	1.01561	0.999802	1.00008
9302.11	0.996663	0.997049	0.99593	0.996625	0.99629	0.997221	0.996735	0.996503	1.01534	0.999754	1.00006
9302.42	0.996648	0.996946	0.996083	0.996631	0.996272	0.997395	0.996776	0.996681	1.01505	0.999832	1.00013
9302.73	0.996588	0.997099	0.995787	0.996568	0.99624	0.997234	0.996716	0.99648	1.01465	0.999743	1
9303.03	0.99675	0.996798	0.996003	0.996603	0.996181	0.997257	0.996695	0.9966	1.0144	0.999695	0.999976
9303.33	0.996426	0.997157	0.995656	0.996513	0.996124	0.997142	0.996806	0.996511	1.01403	0.999711	0.999971
9303.65	0.996488	0.996829	0.995836	0.99659	0.996164	0.997137	0.996754	0.996432	1.0138	0.999719	0.999897
9303.97	0.996355	0.996948	0.995627	0.996536	0.996049	0.997159	0.99672	0.996518	1.01333	0.999677	0.99988
9304.29	0.996419	0.996971	0.995741	0.996451	0.995987	0.996971	0.99652	0.99627	1.01302	0.999641	0.999823
9304.61	0.996458	0.997001	0.995773	0.99651	0.99593	0.997285	0.996805	0.996467	1.01267	0.999537	0.999866
9304.94	0.996354	0.996955	0.995712	0.996475	0.996021	0.99691	0.996533	0.996086	1.01232	0.999458	0.999824
9305.26	0.99633	0.996748	0.995672	0.996592	0.996019	0.997298	0.99664	0.996398	1.01199	0.999416	0.999785
9305.57	0.996333	0.996971	0.995669	0.996338	0.996028	0.99688	0.996455	0.996215	1.01163	0.999401	0.999748
9305.87	0.996294	0.996654	0.995875	0.996401	0.995846	0.997075	0.996453	0.996331	1.0113	0.999418	0.999745
9306.18	0.996179	0.996977	0.99553	0.996311	0.995883	0.996916	0.996547	0.996107	1.01084	0.999373	0.999728
9306.49	0.9963	0.996806	0.995676	0.996391	0.995761	0.996884	0.996392	0.996217	1.01054	0.999325	0.999635
9306.81	0.996116	0.996874	0.995481	0.996301	0.995761	0.997001	0.996601	0.996235	1.01011	0.999177	0.999581
9307.13	0.99632	0.996682	0.995646	0.996409	0.995746	0.996801	0.996423	0.996066	1.00977	0.999126	0.999516
9307.45	0.99616	0.9967	0.995516	0.996183	0.99587	0.996929	0.996415	0.996241	1.00933	0.999112	0.999548
9307.76	0.996175	0.996649	0.995483	0.996212	0.99578	0.996668	0.996258	0.995972	1.00901	0.999051	0.999479
9308.06	0.996194	0.996586	0.9955	0.996229	0.995796	0.996989	0.996404	0.996171	1.00859	0.998954	0.999472
9308.36	0.996114	0.996596	0.995352	0.996098	0.995688	0.996618	0.996275	0.995941	1.00817	0.9988	0.999348
9308.67	0.996136	0.996578	0.995468	0.996265	0.995755	0.996752	0.99645	0.996069	1.00783	0.998707	0.999311
9308.98	0.995963	0.996737	0.995309	0.996121	0.995732	0.996514	0.996329	0.995954	1.00737	0.998648	0.999274
9309.3	0.996116	0.996525	0.995623	0.996311	0.995689	0.9967	0.996135	0.996051	1.0071	0.998566	0.999294
9309.62	0.995998	0.9967	0.995223	0.996086	0.995679	0.996594	0.996267	0.996061	1.00663	0.998465	0.999272
9309.92	0.996044	0.996367	0.995458	0.996039	0.995638	0.996422	0.996178	0.995905	1.00635	0.998372	0.999317
9310.23	0.995935	0.996507	0.995236	0.996053	0.995641	0.996646	0.996257	0.995913	1.00586	0.998196	0.999208
9310.52	0.996064	0.996376	0.995384	0.995959	0.995645	0.996299	0.996097	0.995873	1.00546	0.998025	0.999131
9310.83	0.995941	0.996322	0.995391	0.996035	0.995579	0.99652	0.996169	0.996003	1.00505	0.99791	0.999175
9311.14	0.9959	0.99655	0.995328	0.995919	0.995597	0.996206	0.996115	0.995827	1.00465	0.997805	0.999109
9311.46	0.995972	0.996249	0.995425	0.996012	0.995657	0.996517	0.996086	0.995934	1.00424	0.997698	0.999077
9311.78	0.995833	0.996415	0.995222	0.995886	0.995603	0.996197	0.996044	0.995682	1.0038	0.997561	0.999034
9312.1	0.995944	0.996236	0.99533	0.996003	0.995631	0.996408	0.995939	0.9959	1.00354	0.997455	0.999038
9312.42	0.995812	0.996473	0.995139	0.995857	0.995491	0.996338	0.996041	0.99578	1.0031	0.997324	0.99898
9312.75	0.995922	0.996252	0.995488	0.995998	0.995518	0.996417	0.996038	0.995884	1.00271	0.997257	0.998954
9313.06	0.995713	0.996471	0.995311	0.995936	0.99548	0.996366	0.996165	0.995861	1.00224	0.997146	0.998808
9313.37	0.995871	0.996277	0.995361	0.995934	0.995551	0.996305	0.996126	0.995766	1.00192	0.996972	0.998808
9313.67	0.99583	0.996323	0.995316	0.995999	0.995563	0.996497	0.996005	0.996	1.0015	0.996864	0.998861
9313.97	0.99577	0.99623	0.995277	0.995839	0.995477	0.996088	0.99592	0.995628	1.00115	0.996747	0.998767
9314.3	0.995916	0.996122	0.995393	0.995857	0.995492	0.996411	0.996199	0.99588	1.00083	0.996532	0.998813
9314.62	0.995803	0.99636	0.99523	0.995754	0.995542	0.996153	0.996018	0.995611	1.00037	0.996404	0.998756
9314.94	0.995802	0.996086	0.995431	0.995855	0.995597	0.996433	0.995973	0.995836	1.00005	0.996379	0.998769
9315.25	0.99571	0.99632	0.995246	0.995794	0.995515	0.996276	0.995892	0.995743	0.999601	0.996226	0.998696
9315.55	0.99577	0.996034	0.995469	0.995858	0.995464	0.996491	0.995939	0.995813	0.999342	0.996095	0.998742
9315.85	0.995652	0.99638	0.995175	0.995826	0.995494	0.99622	0.995993	0.99584	0.99895	0.995996	0.998613
9316.16	0.995737	0.996095	0.995403	0.995743	0.995474	0.996158	0.995922	0.995737	0.998661	0.995878	0.99857
9316.48	0.995657	0.996168	0.995253	0.995899	0.995533	0.996403	0.996042	0.995861	0.998277	0.995745	0.998616
9316.8	0.995663	0.996085	0.995267	0.995833	0.995434	0.996143	0.995872	0.995692	0.997986	0.995653	0.998453
9317.11	0.995736	0.996113	0.995267	0.995874	0.995395	0.996369	0.996036	0.995839	0.997645	0.995543	0.998525
9317.42	0.995713	0.996219	0.995247	0.995751	0.995412	0.996041	0.995762	0.995666	0.997409	0.995454	0.998448
9317.74	0.995714	0.996087	0.995446	0.995957	0.995516	0.996309	0.995918	0.995879	0.997213	0.995407	0.998514
9318.03	0.995674	0.99636	0.995232	0.995718	0.995553	0.995957	0.99585	0.995795	0.996914	0.995281	0.998394
9318.33	0.995727	0.996078	0.995452	0.995814	0.995385	0.99628	0.995779	0.995886	0.996769	0.995267	0.998388
9318.65	0.995541	0.996181	0.995284	0.995758	0.995397	0.996029	0.995872	0.995657	0.99648	0.995162	0.998346
9318.96	0.995705	0.995966	0.995471	0.995867	0.995424	0.996079	0.995695	0.995699	0.996382	0.995065	0.998306
9319.28	0.995589	0.996151	0.995245	0.995841	0.99544	0.996222	0.995868	0.995791	0.996119	0.99497	0.998338
9319.61	0.995667	0.996181	0.995364	0.995871	0.995399	0.996126	0.995937	0.995598	0.995993	0.994927	0.998252
9319.94	0.99557	0.996239	0.995332	0.995866	0.995488	0.996393	0.995921	0.995795	0.995811	0.994851	0.998234
9320.26	0.995607	0.99622	0.995314	0.995693	0.995457	0.996079	0.995787	0.995659	0.995683	0.994893	0.998184
9320.57	0.995687	0.99615	0.995491	0.99591	0.995501	0.996601	0.995904	0.995834	0.995585	0.994847	0.998257
9320.88	0.995615	0.996362	0.995404	0.995837	0.995306	0.996268	0.995953	0.995579	0.995422	0.99474	0.998204
9321.19	0.995733	0.996127	0.995517	0.99589	0.995426	0.996463	0.995724	0.995827	0.995436	0.994741	0.99819
9321.5	0.995667	0.996346	0.995257	0.995805	0.995392	0.996226	0.995901	0.995626	0.995263	0.994778	0.998104
9321.82	0.995641	0.996107	0.995483	0.995954	0.995473	0.996314	0.995683	0.99565	0.995371	0.994727	0.998201
9322.14	0.995582	0.996346	0.995244	0.995783	0.995362	0.996364	0.995856	0.995654	0.995192	0.994725	0.998127
9322.45	0.995667	0.996178	0.995472	0.995875	0.995425	0.996061	0.995837	0.995545	0.995212	0.994826	0.998103
9322.76	0.995589	0.996173	0.995384	0.995863	0.995522	0.996279	0.995902	0.995803	0.99512	0.994789	0.998063
9323.06	0.995659	0.996247	0.995402	0.995736	0.99549	0.996176	0.995792	0.995675	0.995132	0.994796	0.998094
9323.36	0.995629	0.996222	0.99538	0.995886	0.995401	0.99644	0.995827	0.995732	0.995201	0.99479	0.998091
9323.67	0.995568	0.996312	0.995319	0.995869	0.995399	0.996082	0.99584	0.995598	0.995142	0.994786	0.998026
9323.99	0.995684	0.996134	0.995526	0.995998	0.995473	0.99646	0.995816	0.995722	0.995159	0.99486	0.998047
9324.31	0.995567	0.996307	0.995317	0.995977	0.995444	0.996131	0.995907	0.995757	0.995129	0.994869	0.997932
9324.63	0.995696	0.99619	0.995504	0.995948	0.995429	0.99636	0.995885	0.995731	0.995265	0.994899	0.998013
9324.94	0.995685	0.99628	0.99524	0.995876	0.995447	0.996234	0.995924	0.995626	0.995213	0.994981	0.997953
9325.25	0.99573	0.996213	0.995502	0.995889	0.995528	0.996323	0.995867	0.995676	0.995257	0.995143	0.997987
9325.55	0.995584	0.996403	0.995271	0.995917	0.995536	0.996324	0.995863	0.995838	0.995186	0.995126	0.997944
9325.85	0.995705	0.996328	0.995469	0.995906	0.995495	0.99616	0.995732	0.995591	0.995306	0.995073	0.997874
9326.17	0.995663	0.996369	0.995389	0.996021	0.99552	0.996391	0.995915	0.99579	0.99534	0.995161	0.997891
9326.49	0.995754	0.996342	0.995438	0.99586	0.995554	0.996113	0.99576	0.995601	0.995337	0.995225	0.997877
9326.8	0.995817	0.99622	0.995447	0.995941	0.9955	0.996373	0.995832	0.995848	0.995369	0.995272	0.997931
9327.12	0.99579	0.996397	0.995424	0.995885	0.99539	0.996069	0.995859	0.995613	0.995271	0.995312	0.997866
9327.45	0.995784	0.996168	0.995726	0.995998	0.995456	0.996346	0.99594	0.995827	0.995315	0.995404	0.997894
9327.78	0.995779	0.996489	0.995456	0.995955	0.995524	0.996188	0.995875	0.995794	0.995253	0.995476	0.997867
9328.09	0.995971	0.996252	0.995716	0.996053	0.995577	0.996245	0.995734	0.995804	0.995311	0.995592	0.99787
9328.41	0.99572	0.99655	0.995551	0.996007	0.995591	0.996367	0.995971	0.995772	0.995176	0.995617	0.997829
9328.71	0.995898	0.996312	0.995695	0.995914	0.995546	0.996215	0.995823	0.995762	0.995238	0.995668	0.99784
9329.01	0.995835	0.996366	0.995698	0.996036	0.995518	0.996472	0.995916	0.995786	0.995187	0.995719	0.997796
9329.33	0.995768	0.996466	0.995597	0.996018	0.995572	0.996132	0.995914	0.995641	0.995144	0.995743	0.997856
9329.66	0.995841	0.996484	0.995673	0.996	0.995577	0.99631	0.99616	0.996082	0.995082	0.995832	0.997862
9329.98	0.995949	0.99652	0.995627	0.99589	0.995549	0.996108	0.995911	0.995803	0.994969	0.995921	0.997723
9330.28	0.995909	0.996336	0.995835	0.996255	0.995674	0.996366	0.995901	0.995954	0.994957	0.996027	0.997931
9330.58	0.995824	0.996516	0.995605	0.996031	0.995677	0.996198	0.995941	0.995875	0.994801	0.995988	0.997804
9330.89	0.996045	0.996248	0.995858	0.996152	0.9957	0.996254	0.995898	0.995991	0.994692	0.99601	0.997904
9331.19	0.995772	0.996438	0.995583	0.996057	0.995704	0.996174	0.995996	0.995967	0.994535	0.996082	0.997731
9331.52	0.995907	0.996367	0.995785	0.996115	0.995702	0.996018	0.995917	0.995945	0.994529	0.996183	0.997774
9331.83	0.99591	0.996624	0.995758	0.996196	0.995744	0.996285	0.996215	0.995989	0.994297	0.996264	0.997915
9332.16	0.995945	0.996324	0.995844	0.996154	0.995797	0.996055	0.995937	0.995787	0.994154	0.99631	0.997851
9332.46	0.99587	0.996338	0.995857	0.996221	0.995828	0.996298	0.99603	0.996165	0.993977	0.9963	0.997799
9332.77	0.995975	0.996473	0.995932	0.996175	0.995739	0.995929	0.995935	0.995896	0.993797	0.996371	0.997708
9333.07	0.995993	0.996375	0.996078	0.996239	0.995864	0.996138	0.996061	0.996145	0.993672	0.996451	0.997831
9333.37	0.995931	0.996444	0.995917	0.996117	0.995831	0.995922	0.996029	0.996034	0.993361	0.99645	0.997766
9333.69	0.996099	0.996198	0.99604	0.996196	0.99586	0.996167	0.996047	0.996166	0.99321	0.996496	0.997794
9334.01	0.995947	0.996399	0.995901	0.996177	0.995863	0.996041	0.996168	0.996032	0.992885	0.996572	0.99776
9334.34	0.996187	0.996106	0.996206	0.996379	0.995865	0.995878	0.995939	0.996156	0.992711	0.996601	0.997778
9334.67	0.995966	0.996338	0.995994	0.996238	0.995857	0.995997	0.996093	0.996114	0.992384	0.99658	0.997824
9334.99	0.996106	0.996168	0.996182	0.996234	0.995838	0.995923	0.995992	0.99606	0.992154	0.996712	0.99786
9335.31	0.996064	0.99635	0.996098	0.996162	0.995974	0.996231	0.996232	0.996294	0.991826	0.996784	0.997906
9335.62	0.996157	0.996391	0.996261	0.996182	0.995998	0.995925	0.996043	0.996034	0.99159	0.996796	0.99778
9335.93	0.99604	0.996315	0.996274	0.996338	0.99599	0.996083	0.996214	0.996368	0.991291	0.996805	0.997861
9336.24	0.996092	0.996415	0.996187	0.996214	0.995917	0.995955	0.996108	0.996164	0.990974	0.996787	0.997767
9336.56	0.996228	0.996229	0.996382	0.996263	0.996	0.996196	0.996119	0.99632	0.990722	0.99688	0.997895
9336.88	0.9961	0.996339	0.996137	0.996203	0.99603	0.99587	0.996184	0.996228	0.990374	0.996859	0.997893
9337.2	0.996256	0.996235	0.99646	0.996335	0.99606	0.995953	0.996106	0.996367	0.990126	0.9969	0.997913
9337.52	0.996194	0.996438	0.9963	0.996219	0.996066	0.996168	0.99622	0.996442	0.989729	0.996863	0.997831
9337.83	0.9964	0.996175	0.996518	0.99638	0.996193	0.995876	0.99623	0.996357	0.989406	0.996877	0.997832
9338.14	0.996147	0.996261	0.996435	0.996466	0.996132	0.996093	0.996347	0.996569	0.989046	0.996889	0.997878
9338.44	0.996253	0.996227	0.996438	0.996411	0.996154	0.995991	0.99615	0.996368	0.988812	0.996885	0.997831
9338.74	0.99636	0.996255	0.996513	0.996431	0.996095	0.996179	0.996061	0.996663	0.988587	0.996913	0.997875
9339.05	0.996373	0.996392	0.996455	0.996424	0.996117	0.995887	0.995986	0.996377	0.988234	0.996889	0.997769
9339.38	0.996403	0.996252	0.996549	0.996465	0.996233	0.996117	0.996308	0.996656	0.987943	0.99684	0.997894
9339.7	0.996338	0.996557	0.996414	0.996336	0.996178	0.995849	0.996219	0.9964	0.987651	0.99684	0.997916
9340.02	0.996413	0.99626	0.996713	0.996591	0.996258	0.996072	0.99624	0.99666	0.987434	0.996879	0.997991
9340.32	0.99642	0.996604	0.996489	0.996522	0.996238	0.996023	0.996253	0.996755	0.987085	0.996857	0.997923
9340.62	0.996404	0.996339	0.996626	0.996549	0.996254	0.996057	0.996226	0.996636	0.986869	0.996883	0.997917
9340.93	0.996341	0.996598	0.996609	0.996624	0.996347	0.996147	0.996453	0.996688	0.986596	0.996807	0.997919
9341.25	0.99647	0.99632	0.996813	0.996558	0.996345	0.995832	0.996283	0.996587	0.986442	0.996731	0.997815
9341.58	0.996382	0.996429	0.996663	0.996614	0.996372	0.996286	0.99648	0.996777	0.986184	0.996691	0.997905
9341.9	0.996592	0.99643	0.996762	0.996425	0.996403	0.995953	0.996317	0.996564	0.986007	0.996653	0.998009
9342.22	0.996612	0.996516	0.996802	0.996674	0.996381	0.996322	0.996437	0.996837	0.986009	0.996614	0.997942
9342.55	0.996647	0.996542	0.99666	0.996715	0.996498	0.99587	0.996457	0.996647	0.985853	0.996581	0.997911
9342.86	0.996667	0.996419	0.99701	0.996869	0.996489	0.996329	0.996687	0.996898	0.985763	0.996534	0.997965
9343.17	0.996687	0.996703	0.996749	0.996566	0.996592	0.99615	0.996573	0.996881	0.985605	0.996438	0.997881
9343.48	0.996761	0.99641	0.996971	0.996856	0.996584	0.99627	0.996547	0.996929	0.985676	0.996412	0.997969
9343.78	0.996569	0.996694	0.996713	0.996784	0.99651	0.9963	0.996633	0.996959	0.985537	0.996407	0.997912
9344.1	0.996713	0.996481	0.996931	0.996699	0.996567	0.996127	0.996547	0.996881	0.985561	0.99644	0.997871
9344.42	0.996648	0.996746	0.996921	0.996815	0.996686	0.996355	0.9966	0.997093	0.985528	0.996361	0.998025
9344.75	0.996777	0.996671	0.996991	0.99684	0.996674	0.99607	0.996598	0.996911	0.985565	0.996229	0.997934
9345.07	0.996775	0.996744	0.997039	0.997022	0.996706	0.996492	0.99675	0.997218	0.985643	0.996169	0.997955
9345.37	0.996803	0.996835	0.996923	0.996885	0.996709	0.996065	0.996609	0.997108	0.985712	0.9961	0.997889
9345.68	0.996951	0.996719	0.997224	0.997042	0.996831	0.996395	0.996728	0.997135	0.985861	0.996032	0.998079
9345.99	0.996774	0.996828	0.997012	0.996985	0.996841	0.99616	0.996601	0.997007	0.98589	0.995884	0.997934
9346.29	0.996895	0.996652	0.997337	0.99708	0.996841	0.996455	0.996645	0.997247	0.986132	0.995783	0.997999
9346.62	0.99679	0.996919	0.997086	0.996932	0.996836	0.996481	0.996751	0.997164	0.986217	0.995685	0.998019
9346.94	0.996989	0.996679	0.997267	0.997055	0.996917	0.996463	0.996752	0.997194	0.986468	0.995689	0.997905
9347.27	0.996991	0.99681	0.997239	0.997196	0.996936	0.996536	0.996983	0.997399	0.986589	0.995613	0.997919
9347.58	0.9972	0.996859	0.997308	0.99714	0.997042	0.996397	0.996927	0.997176	0.98674	0.995539	0.997979
9347.89	0.997033	0.997006	0.997413	0.997201	0.997056	0.996716	0.99692	0.997391	0.986898	0.995428	0.998062
9348.19	0.997032	0.997007	0.997278	0.997121	0.996986	0.996493	0.996797	0.99728	0.987062	0.995352	0.997892
9348.5	0.997187	0.996944	0.997496	0.997344	0.997091	0.996736	0.996968	0.997457	0.987259	0.995257	0.997938
9348.81	0.997251	0.997093	0.997326	0.997312	0.997073	0.996511	0.997009	0.997279	0.98738	0.995107	0.997989
9349.13	0.997251	0.996906	0.997615	0.997323	0.997205	0.996664	0.996986	0.997461	0.987657	0.99504	0.998007
9349.45	0.997197	0.997098	0.997373	0.997316	0.99725	0.996621	0.997045	0.997385	0.987784	0.995033	0.997942
9349.78	0.997384	0.997019	0.99761	0.997371	0.997183	0.996741	0.997044	0.997542	0.988004	0.995023	0.998034
9350.1	0.997281	0.997277	0.997456	0.997396	0.997206	0.996813	0.997181	0.99777	0.988103	0.994852	0.997999
9350.43	0.997418	0.99715	0.997698	0.997401	0.997382	0.99679	0.997119	0.997509	0.988393	0.994812	0.997961
9350.74	0.997254	0.997149	0.997591	0.9975	0.997287	0.997013	0.997256	0.997798	0.988496	0.994848	0.99799
9351.05	0.997506	0.997322	0.997677	0.997398	0.997329	0.996799	0.997177	0.997636	0.988583	0.99478	0.997897
9351.35	0.997542	0.997242	0.99782	0.997567	0.997382	0.997032	0.997243	0.997848	0.98874	0.994697	0.998034
9351.67	0.997401	0.99737	0.99767	0.997485	0.997417	0.996722	0.997311	0.997744	0.988878	0.994649	0.998014
9352	0.99764	0.997225	0.997913	0.997566	0.997475	0.997034	0.997232	0.998038	0.989022	0.994603	0.997956
9352.32	0.997582	0.997515	0.997745	0.997636	0.997527	0.996918	0.997431	0.997973	0.989064	0.994496	0.997939
9352.64	0.997725	0.997212	0.998081	0.997766	0.997496	0.996985	0.997249	0.997869	0.989298	0.994512	0.998084
9352.95	0.997633	0.997599	0.9978	0.997868	0.997624	0.997127	0.997531	0.998063	0.9893	0.994479	0.998017
9353.25	0.997912	0.997344	0.998008	0.997667	0.997601	0.997118	0.997414	0.998053	0.989509	0.994412	0.997927
9353.55	0.997644	0.997563	0.997992	0.997745	0.997629	0.997374	0.997546	0.998196	0.989605	0.994327	0.997952
9353.86	0.997817	0.997565	0.997931	0.997759	0.997686	0.997048	0.997501	0.99798	0.989692	0.99434	0.997906
9354.18	0.997721	0.997619	0.998085	0.997908	0.997723	0.997267	0.997677	0.998273	0.989832	0.994386	0.997968
9354.5	0.997853	0.997618	0.997944	0.99784	0.997758	0.997209	0.997737	0.998086	0.989968	0.99431	0.997899
9354.82	0.997971	0.997563	0.998143	0.997947	0.99782	0.997565	0.997762	0.998302	0.990138	0.994313	0.998016
9355.13	0.997859	0.997907	0.998106	0.997948	0.997889	0.997246	0.997768	0.998079	0.990215	0.994331	0.997986
9355.44	0.997996	0.997591	0.998447	0.998084	0.997979	0.997633	0.997749	0.998316	0.990397	0.994355	0.997974
9355.74	0.997973	0.997822	0.998212	0.997996	0.997952	0.997526	0.997859	0.998266	0.9904	0.994312	0.998009
9356.05	0.998211	0.997715	0.998515	0.998048	0.997946	0.997529	0.997755	0.998264	0.990556	0.994314	0.998012
9356.37	0.998177	0.997907	0.998265	0.998155	0.998085	0.997682	0.998004	0.998481	0.990618	0.994337	0.997999
9356.69	0.998165	0.997935	0.998442	0.998138	0.99804	0.99749	0.997824	0.998372	0.990756	0.994404	0.99792
9357.02	0.998236	0.997944	0.998435	0.998254	0.998223	0.997767	0.997971	0.998661	0.990852	0.994457	0.998027
9357.34	0.998271	0.998168	0.9985	0.998163	0.998211	0.997635	0.998079	0.998432	0.991073	0.994518	0.997861
9357.67	0.998204	0.998156	0.998611	0.998369	0.998256	0.997982	0.998133	0.998786	0.991271	0.994569	0.99802
9358	0.998323	0.998217	0.998443	0.998368	0.998229	0.997723	0.998058	0.998756	0.991347	0.99462	0.997918
9358.31	0.998448	0.997925	0.998777	0.998505	0.998334	0.997853	0.998046	0.998763	0.991618	0.99472	0.998022
9358.62	0.998443	0.99831	0.998553	0.998388	0.998382	0.997855	0.998103	0.998755	0.991709	0.994679	0.997927
9358.93	0.998571	0.99823	0.998796	0.998457	0.998352	0.997992	0.998065	0.998828	0.991866	0.994747	0.997931
9359.25	0.9985	0.998329	0.998679	0.998381	0.998357	0.998007	0.998365	0.998879	0.991905	0.994911	0.997941
9359.58	0.998646	0.998315	0.998946	0.998565	0.998533	0.997933	0.99833	0.998849	0.992208	0.995094	0.998037
9359.9	0.998711	0.9984	0.998879	0.998651	0.998568	0.998298	0.998388	0.999058	0.992332	0.995152	0.998051
9360.21	0.998749	0.998458	0.99905	0.998628	0.998543	0.998035	0.998241	0.998892	0.992559	0.995151	0.997924
9360.52	0.998629	0.998485	0.999105	0.998844	0.99868	0.998275	0.998404	0.999124	0.992771	0.995231	0.998005
9360.82	0.998784	0.998575	0.999046	0.998679	0.998805	0.998012	0.998434	0.998907	0.992867	0.99537	0.997926
9361.13	0.99894	0.998489	0.999181	0.998825	0.998803	0.998421	0.998445	0.999208	0.9931	0.995512	0.997964
9361.44	0.998792	0.998626	0.99903	0.998656	0.998831	0.998132	0.99855	0.999087	0.993237	0.995506	0.997908
9361.75	0.999011	0.998429	0.999306	0.998894	0.998826	0.998396	0.998503	0.999272	0.993489	0.995676	0.997979
9362.08	0.998886	0.998782	0.999096	0.998816	0.998851	0.99842	0.99875	0.999169	0.993603	0.995851	0.998019
9362.4	0.999076	0.998648	0.999341	0.999026	0.999107	0.998425	0.998594	0.999114	0.993806	0.995984	0.997992
9362.72	0.999013	0.998851	0.999314	0.999027	0.999081	0.998501	0.998826	0.999297	0.993934	0.996065	0.997941
9363.02	0.999274	0.998869	0.999362	0.999044	0.999113	0.998363	0.998705	0.999323	0.994178	0.996174	0.997924
9363.33	0.999202	0.998826	0.999474	0.99913	0.999177	0.998685	0.998924	0.999505	0.994365	0.996321	0.997944
9363.65	0.999074	0.998955	0.999487	0.999077	0.999237	0.998443	0.998832	0.999255	0.9945	0.99646	0.997838
9363.96	0.999289	0.998863	0.999591	0.999137	0.99926	0.998626	0.999053	0.999583	0.994669	0.996609	0.997933
9364.28	0.99925	0.999132	0.999493	0.999156	0.999296	0.998627	0.99893	0.999422	0.994788	0.996768	0.99791
9364.6	0.999432	0.998995	0.99974	0.999377	0.999371	0.998856	0.998979	0.999446	0.994981	0.996903	0.997967
9364.92	0.999342	0.999238	0.999612	0.999317	0.999383	0.998758	0.999038	0.999518	0.995033	0.997044	0.99798
9365.26	0.999509	0.998972	0.999746	0.999275	0.999536	0.998843	0.998943	0.999673	0.995306	0.997298	0.997939
9365.58	0.999404	0.999257	0.999702	0.999364	0.999617	0.998843	0.999246	0.9997	0.995444	0.997476	0.997908
9365.9	0.999622	0.999105	0.999886	0.999529	0.999589	0.998817	0.999048	0.999675	0.995699	0.997636	0.998002
9366.21	0.999426	0.999285	0.999898	0.999439	0.99965	0.999145	0.999296	0.999921	0.995775	0.997806	0.997894
9366.52	0.999607	0.99932	0.999994	0.999446	0.999724	0.998882	0.999153	0.999718	0.995911	0.997995	0.997794
9366.85	0.99975	0.999367	0.999985	0.999609	0.999755	0.999261	0.999372	1.00004	0.996152	0.998156	0.997927
[truncated: 2,001 more rows]

## Sheet: Figure 3c
1.87968	8987.3
1.88334	8987.31
1.89623	8987.35
1.8951	8987.34
1.85329	8987.23
1.8385	8987.19
1.80904	8987.11
1.78136	8987.03

## Sheet: Figure 3d
	CuHHTP-CN	CuHHTP-F	CuHHTP-Cl	CuHHTP-Br	CuHHTP	CuHHTP-Me	CuHHTP-NH2	CuHHTP-NHBu
0	0.05617	-0.91707	-1.93425	-2.94153	-3.93177	-4.91395	-5.92531	-6.93404
0.03068	0.06329	-0.91913	-1.92759	-2.93568	-3.92277	-4.91578	-5.92128	-6.92947
0.06136	0.07834	-0.92455	-1.91228	-2.92284	-3.90401	-4.92056	-5.91174	-6.91849
0.09204	0.09221	-0.93105	-1.89587	-2.91044	-3.88715	-4.92615	-5.90164	-6.90612
0.12272	0.09983	-0.93486	-1.8833	-2.90305	-3.87861	-4.92924	-5.89479	-6.8962
0.1534	0.09949	-0.93234	-1.87717	-2.90238	-3.8805	-4.92681	-5.893	-6.8909
0.18408	0.09229	-0.92322	-1.87843	-2.90763	-3.89143	-4.91861	-5.89608	-6.89104
0.21476	0.08251	-0.91067	-1.88639	-2.91538	-3.90583	-4.90727	-5.90177	-6.89604
0.24544	0.07764	-0.89843	-1.89842	-2.91964	-3.91351	-4.89613	-5.90595	-6.90379
0.27612	0.08408	-0.88926	-1.90911	-2.91495	-3.90567	-4.88776	-5.90426	-6.91029
0.3068	0.09977	-0.88472	-1.91081	-2.90182	-3.88608	-4.88366	-5.89537	-6.91047
0.33748	0.11739	-0.88513	-1.89934	-2.8858	-3.86522	-4.88409	-5.88219	-6.90156
0.36816	0.13082	-0.88937	-1.8787	-2.87238	-3.85086	-4.88789	-5.86923	-6.88573
0.39884	0.13682	-0.89468	-1.85612	-2.86496	-3.84672	-4.89238	-5.86016	-6.86779
0.42951	0.13495	-0.89671	-1.83743	-2.86453	-3.8528	-4.89355	-5.85688	-6.85224
0.46019	0.12782	-0.89137	-1.82658	-2.86948	-3.86502	-4.88788	-5.85916	-6.84238
0.49087	0.12128	-0.87778	-1.82579	-2.87538	-3.87478	-4.87484	-5.86436	-6.84012
0.52155	0.12271	-0.85882	-1.83526	-2.87578	-3.87204	-4.85714	-5.86756	-6.84564
0.55223	0.13575	-0.83868	-1.85215	-2.8659	-3.85449	-4.83871	-5.86329	-6.85669
0.58291	0.15707	-0.82091	-1.8681	-2.84649	-3.82971	-4.82284	-5.84922	-6.86696
0.61359	0.18058	-0.80765	-1.86748	-2.8223	-3.8066	-4.81149	-5.82769	-6.86557
0.64427	0.20217	-0.79915	-1.83829	-2.79764	-3.78988	-4.80467	-5.80309	-6.84326
0.67495	0.22149	-0.79322	-1.78578	-2.77417	-3.77854	-4.79985	-5.77859	-6.80119
0.70563	0.24218	-0.78482	-1.72155	-2.75037	-3.76533	-4.79155	-5.75477	-6.74695
0.73631	0.27051	-0.76694	-1.65436	-2.72215	-3.73904	-4.77251	-5.72931	-6.68764
0.76699	0.31187	-0.73369	-1.59019	-2.68496	-3.69193	-4.73719	-5.69789	-6.62845
0.79767	0.3673	-0.68356	-1.53312	-2.63643	-3.62552	-4.68488	-5.65633	-6.57298
0.82835	0.433	-0.61949	-1.48549	-2.57786	-3.5483	-4.61913	-5.60296	-6.52343
0.85903	0.50238	-0.54662	-1.44789	-2.51361	-3.47065	-4.54532	-5.53968	-6.48064
0.88971	0.56837	-0.4706	-1.41903	-2.4495	-3.40186	-4.46907	-5.4711	-6.44416
0.92039	0.62493	-0.39677	-1.39593	-2.39121	-3.3486	-4.39562	-5.40305	-6.41236
0.95107	0.66817	-0.3298	-1.37442	-2.34312	-3.31395	-4.32944	-5.3412	-6.3829
0.98175	0.69711	-0.27335	-1.35014	-2.30742	-3.29653	-4.274	-5.28998	-6.35334
1.01243	0.71414	-0.2297	-1.31985	-2.28351	-3.29008	-4.23134	-5.25171	-6.32177
1.04311	0.725	-0.19939	-1.28243	-2.26779	-3.28417	-4.20166	-5.22605	-6.28732
1.07379	0.73773	-0.18075	-1.23902	-2.25404	-3.26698	-4.18293	-5.20964	-6.25022
1.10447	0.76044	-0.16956	-1.19224	-2.23482	-3.23015	-4.17053	-5.19626	-6.21136
1.13515	0.79831	-0.15906	-1.14497	-2.20367	-3.17286	-4.15739	-5.17796	-6.17161
1.16583	0.85175	-0.14071	-1.09904	-2.15741	-3.10158	-4.1349	-5.1471	-6.13109
1.19651	0.91697	-0.10602	-1.05442	-2.09686	-3.02588	-4.09493	-5.09878	-6.08871
1.22718	0.9884	-0.04929	-1.00901	-2.02577	-2.95401	-4.03252	-5.03243	-6.0422
1.25786	1.06124	0.03041	-0.95907	-1.9487	-2.89013	-3.94764	-4.95132	-5.98867
1.28854	1.13297	0.12904	-0.90047	-1.86938	-2.83327	-3.84493	-4.86086	-5.92565
1.31922	1.20351	0.23919	-0.83034	-1.78995	-2.77811	-3.7321	-4.76673	-5.85226
1.3499	1.2743	0.352	-0.74849	-1.71126	-2.71729	-3.61804	-4.67394	-5.77004
1.38058	1.34676	0.4586	-0.6581	-1.63376	-2.64498	-3.51148	-4.58654	-5.68303
1.41126	1.42054	0.551	-0.56532	-1.55874	-2.56028	-3.42027	-4.50795	-5.59732
1.44194	1.49245	0.62248	-0.47818	-1.48915	-2.46864	-3.35092	-4.44152	-5.52014
1.47262	1.55641	0.66785	-0.40531	-1.42993	-2.38074	-3.30844	-4.39087	-5.45891
1.5033	1.60438	0.68359	-0.35487	-1.3876	-2.30978	-3.29613	-4.36011	-5.42044
1.53398	1.62782	0.66791	-0.33361	-1.36922	-2.26863	-3.3156	-4.35359	-5.41018
1.56466	1.61924	0.62073	-0.34627	-1.38126	-2.26758	-3.36675	-4.37538	-5.43182
1.59534	1.57351	0.5436	-0.39517	-1.42839	-2.31286	-3.44781	-4.42859	-5.48685
1.62602	1.48872	0.43965	-0.47999	-1.5126	-2.40592	-3.55551	-4.51458	-5.57449
1.6567	1.36672	0.31338	-0.59773	-1.63258	-2.54314	-3.68519	-4.63233	-5.69158
1.68738	1.21323	0.17056	-0.7428	-1.7834	-2.71601	-3.83092	-4.77802	-5.83267
1.71806	1.03781	0.01812	-0.90708	-1.95643	-2.91147	-3.98567	-4.94459	-5.99011
1.74874	0.85386	-0.13585	-1.08001	-2.13922	-3.11202	-4.14121	-5.12151	-6.15407
1.77942	0.67905	-0.28183	-1.24826	-2.31491	-3.29543	-4.28787	-5.29401	-6.31215
1.8101	0.53623	-0.40844	-1.39496	-2.46099	-3.43483	-4.41406	-5.44171	-6.44868
1.84078	0.4508	-0.50258	-1.49992	-2.55091	-3.50628	-4.50649	-5.53895	-6.54488
1.87146	0.43309	-0.55312	-1.54685	-2.57099	-3.51108	-4.55425	-5.56781	-6.58614
1.90214	0.46057	-0.5597	-1.53993	-2.542	-3.48106	-4.55794	-5.54201	-6.57775
1.93282	0.499	-0.53613	-1.5042	-2.49986	-3.44899	-4.53227	-5.49627	-6.544
1.9635	0.52695	-0.50061	-1.46464	-2.46811	-3.4315	-4.49557	-5.4569	-6.50792
1.99418	0.53702	-0.46655	-1.43546	-2.45558	-3.43154	-4.46093	-5.43558	-6.48222
2.02485	0.53078	-0.44129	-1.42183	-2.46157	-3.4436	-4.43539	-5.43396	-6.47123
2.05553	0.51485	-0.42792	-1.42322	-2.47975	-3.45813	-4.42184	-5.44748	-6.47413
2.08621	0.49773	-0.42692	-1.43581	-2.50108	-3.46606	-4.42065	-5.46815	-6.48708
2.11689	0.48639	-0.43728	-1.45431	-2.51712	-3.46329	-4.4308	-5.4873	-6.50488
2.14757	0.48322	-0.45721	-1.47362	-2.52366	-3.4526	-4.4505	-5.49896	-6.52254
2.17825	0.48516	-0.48461	-1.49041	-2.52258	-3.44165	-4.47774	-5.50248	-6.53687
2.20893	0.4858	-0.51743	-1.50413	-2.52035	-3.43891	-4.51051	-5.50251	-6.5475
2.23961	0.47852	-0.55387	-1.51697	-2.52457	-3.4507	-4.54712	-5.50628	-6.55674
2.27029	0.45874	-0.59255	-1.53266	-2.54107	-3.48003	-4.58619	-5.52049	-6.56842
2.30097	0.42467	-0.63247	-1.55506	-2.57272	-3.52656	-4.6267	-5.54933	-6.58641
2.33165	0.37733	-0.67294	-1.58692	-2.61929	-3.58716	-4.66789	-5.59386	-6.61348
2.36233	0.32003	-0.71346	-1.62938	-2.67792	-3.65666	-4.70909	-5.6522	-6.65075
2.39301	0.25782	-0.75349	-1.68188	-2.74362	-3.72858	-4.74961	-5.71986	-6.69767
2.42369	0.19704	-0.79235	-1.74232	-2.80968	-3.79581	-4.78852	-5.79004	-6.75216
2.45437	0.14509	-0.82902	-1.80749	-2.86734	-3.85103	-4.82463	-5.85307	-6.81075
2.48505	0.10988	-0.86209	-1.87336	-2.90466	-3.88778	-4.85644	-5.89425	-6.86853
2.51573	0.09535	-0.88965	-1.93501	-2.9127	-3.90465	-4.88221	-5.90064	-6.91732
2.54641	0.09421	-0.90956	-1.97738	-2.90367	-3.90945	-4.90054	-5.88597	-6.93965
2.57709	0.09431	-0.92043	-1.95171	-2.89617	-3.91209	-4.91128	-5.87312	-6.92595
2.60777	0.08915	-0.92339	-1.91901	-2.89792	-3.91655	-4.91636	-5.8721	-6.90244
2.63845	0.07823	-0.92194	-1.89771	-2.90922	-3.92111	-4.91881	-5.88476	-6.88533
2.66913	0.06561	-0.91934	-1.88865	-2.92573	-3.92173	-4.92106	-5.90864	-6.87874
2.69981	0.05931	-0.91708	-1.89014	-2.93778	-3.91634	-4.92379	-5.9369	-6.88274
2.73049	0.06597	-0.91483	-1.89835	-2.93332	-3.90693	-4.9258	-5.95185	-6.89522
2.76117	0.0822	-0.91104	-1.90698	-2.91382	-3.89714	-4.92449	-5.93466	-6.91179
2.79185	0.10073	-0.90398	-1.90799	-2.89019	-3.88928	-4.91741	-5.90398	-6.92472
2.82252	0.11722	-0.8928	-1.89689	-2.86933	-3.88355	-4.90419	-5.87583	-6.92436
2.8532	0.13007	-0.87802	-1.87677	-2.85414	-3.8782	-4.88662	-5.85576	-6.90889
2.88388	0.13955	-0.86111	-1.8537	-2.84499	-3.87063	-4.86716	-5.84535	-6.88602
2.91456	0.14709	-0.84377	-1.83223	-2.84039	-3.85897	-4.84805	-5.84354	-6.86273
2.94524	0.15464	-0.82755	-1.8148	-2.83747	-3.84327	-4.83094	-5.84677	-6.84269
2.97592	0.16387	-0.81354	-1.80209	-2.83288	-3.8253	-4.81692	-5.84924	-6.82734
3.0066	0.1755	-0.80231	-1.79339	-2.82416	-3.80739	-4.80642	-5.84478	-6.8166
3.03728	0.18913	-0.7939	-1.787	-2.81086	-3.79138	-4.79926	-5.83041	-6.80934
3.06796	0.20362	-0.78778	-1.78081	-2.7945	-3.77813	-4.79464	-5.8083	-6.80376
3.09864	0.21762	-0.78299	-1.77302	-2.77754	-3.76749	-4.79124	-5.78338	-6.79801
3.12932	0.22998	-0.77833	-1.76287	-2.76228	-3.75849	-4.78749	-5.76042	-6.79076
3.16	0.23996	-0.77263	-1.75085	-2.75025	-3.74992	-4.78193	-5.74268	-6.7817
3.19068	0.24726	-0.76514	-1.73841	-2.74205	-3.74087	-4.77367	-5.73169	-6.77153
3.22136	0.25196	-0.75575	-1.72735	-2.73743	-3.73124	-4.76272	-5.72734	-6.76159
3.25204	0.25439	-0.74507	-1.71929	-2.73548	-3.72177	-4.74995	-5.72812	-6.75333
3.28272	0.25505	-0.73427	-1.71525	-2.735	-3.71375	-4.73685	-5.73161	-6.74791
3.3134	0.25441	-0.72474	-1.71557	-2.73496	-3.70855	-4.72513	-5.73512	-6.74598
3.34408	0.25282	-0.71792	-1.71994	-2.73485	-3.70719	-4.71641	-5.73668	-6.74763
3.37476	0.25038	-0.71503	-1.72757	-2.73492	-3.7101	-4.71201	-5.73581	-6.75249
3.40544	0.24688	-0.71694	-1.73742	-2.73608	-3.7171	-4.71289	-5.73365	-6.7599
3.43612	0.24183	-0.72418	-1.74858	-2.73964	-3.72755	-4.71953	-5.73248	-6.76913
3.4668	0.23453	-0.73682	-1.76048	-2.74694	-3.74059	-4.732	-5.7348	-6.7796
3.49748	0.22423	-0.7546	-1.7731	-2.759	-3.75546	-4.74996	-5.7426	-6.79105
3.52816	0.21031	-0.77687	-1.78692	-2.77635	-3.77174	-4.77269	-5.757	-6.80358
3.55884	0.19244	-0.80274	-1.80268	-2.79887	-3.78946	-4.79922	-5.77809	-6.81752
3.58952	0.17068	-0.83107	-1.8211	-2.82586	-3.80896	-4.82833	-5.80499	-6.83331
3.62019	0.14557	-0.86055	-1.84264	-2.85599	-3.83066	-4.85865	-5.83602	-6.85121
3.65087	0.11814	-0.88979	-1.86728	-2.88746	-3.85478	-4.88871	-5.86883	-6.87122
3.68155	0.08986	-0.91726	-1.89449	-2.91788	-3.88114	-4.91692	-5.90048	-6.89287
3.71223	0.06275	-0.94113	-1.92328	-2.94386	-3.90901	-4.94137	-5.92733	-6.91519
3.74291	0.0399	-0.95883	-1.95221	-2.95989	-3.93709	-4.95931	-5.94487	-6.93654
3.77359	0.02732	-0.96701	-1.97921	-2.9611	-3.96322	-4.96705	-5.95029	-6.95404
3.80427	0.02961	-0.96581	-1.98977	-2.95376	-3.98128	-4.965	-5.94765	-6.96309
3.83495	0.03737	-0.9611	-1.97165	-2.94677	-3.9766	-4.95966	-5.94407	-6.96128
3.86563	0.04264	-0.95746	-1.95638	-2.94362	-3.96295	-4.95561	-5.94343	-6.95392
3.89631	0.0433	-0.95656	-1.94686	-2.94491	-3.95255	-4.95444	-5.94676	-6.94688
3.92699	0.03928	-0.9587	-1.94359	-2.95	-3.94744	-4.95641	-5.95357	-6.94286
3.95767	0.03144	-0.96358	-1.94638	-2.95755	-3.94777	-4.9612	-5.96267	-6.94273
3.98835	0.02127	-0.97058	-1.95459	-2.96566	-3.95295	-4.96825	-5.97247	-6.94648
4.01903	0.01156	-0.97879	-1.96703	-2.97212	-3.96196	-4.97688	-5.98115	-6.95361
4.04971	0.0106	-0.98653	-1.98176	-2.97515	-3.97345	-4.98632	-5.98681	-6.96325
4.08039	0.01826	-0.98934	-1.99033	-2.97509	-3.98598	-4.99527	-5.98878	-6.97434
4.11107	0.02554	-0.98422	-1.97811	-2.9742	-3.99778	-4.99312	-5.98946	-6.98563
4.14175	0.03024	-0.97662	-1.96268	-2.97437	-3.99095	-4.9849	-5.99148	-6.9947
4.17243	0.032	-0.96937	-1.94924	-2.97617	-3.98279	-4.97751	-5.99569	-6.99178
4.20311	0.03137	-0.96329	-1.93915	-2.97903	-3.97756	-4.97146	-5.99752	-6.98525
4.23379	0.02972	-0.95867	-1.93306	-2.98121	-3.97534	-4.96688	-5.98995	-6.98085
4.26447	0.02907	-0.95562	-1.93113	-2.98056	-3.97569	-4.9638	-5.98165	-6.97901
4.29515	0.03111	-0.9541	-1.93307	-2.9768	-3.97761	-4.96213	-5.97372	-6.97946
4.32583	0.0357	-0.95399	-1.93814	-2.97179	-3.97946	-4.96175	-5.967	-6.98137
4.35651	0.04126	-0.95516	-1.94519	-2.96731	-3.97941	-4.96251	-5.96213	-6.98328
4.38719	0.04613	-0.95742	-1.95266	-2.96442	-3.97682	-4.96422	-5.95948	-6.98327
4.41786	0.04918	-0.9606	-1.9587	-2.96362	-3.97278	-4.96672	-5.95913	-6.98061
4.44854	0.0498	-0.96454	-1.96171	-2.96496	-3.96869	-4.96982	-5.96087	-6.97644
4.47922	0.04786	-0.96906	-1.9614	-2.96814	-3.96544	-4.97326	-5.96424	-6.97228
4.5099	0.0436	-0.97394	-1.95905	-2.97259	-3.96331	-4.97672	-5.96858	-6.96912
4.54058	0.03758	-0.97888	-1.95633	-2.97754	-3.96212	-4.97968	-5.97311	-6.9674
4.57126	0.03056	-0.9834	-1.95433	-2.9821	-3.96135	-4.98143	-5.97703	-6.96713
4.60194	0.0234	-0.98658	-1.95334	-2.98542	-3.96035	-4.98138	-5.97964	-6.96786
4.63262	0.01705	-0.98728	-1.95306	-2.98697	-3.95865	-4.97958	-5.98067	-6.96875
4.6633	0.01252	-0.9854	-1.95285	-2.98693	-3.95622	-4.97667	-5.98033	-6.96877
4.69398	0.01072	-0.9822	-1.95209	-2.98585	-3.9535	-4.97344	-5.97909	-6.96718
4.72466	0.01152	-0.97882	-1.95048	-2.98397	-3.95111	-4.97048	-5.97734	-6.96403
4.75534	0.01384	-0.97592	-1.94829	-2.9813	-3.94969	-4.96821	-5.97535	-6.96012
4.78602	0.01703	-0.97384	-1.94618	-2.97797	-3.9497	-4.96691	-5.97333	-6.95643
4.8167	0.02079	-0.97275	-1.94492	-2.97436	-3.95136	-4.96671	-5.97158	-6.95382
4.84738	0.02479	-0.97271	-1.94518	-2.97103	-3.95463	-4.96767	-5.97038	-6.95287
4.87806	0.02853	-0.97366	-1.94738	-2.96854	-3.95925	-4.96972	-5.96999	-6.95389
4.90874	0.03142	-0.97547	-1.95166	-2.96735	-3.96474	-4.97268	-5.97058	-6.95694
4.93942	0.03295	-0.97788	-1.95789	-2.96776	-3.97043	-4.97629	-5.97216	-6.96183
4.9701	0.03272	-0.98052	-1.96571	-2.96984	-3.97548	-4.98012	-5.97459	-6.96819
5.00078	0.03054	-0.9829	-1.97453	-2.97345	-3.9791	-4.98356	-5.97755	-6.97544
5.03146	0.02644	-0.98445	-1.9836	-2.97825	-3.98083	-4.98576	-5.98059	-6.9828
5.06214	0.02069	-0.98478	-1.99165	-2.98368	-3.98105	-4.986	-5.98317	-6.98893
5.09282	0.01375	-0.98392	-1.99404	-2.98878	-3.98065	-4.98444	-5.98472	-6.99116
5.1235	0.00652	-0.98236	-1.98939	-2.99164	-3.98034	-4.98199	-5.98498	-6.98873
5.15418	0.0043	-0.98063	-1.98481	-2.9904	-3.98035	-4.97942	-5.98413	-6.98525
5.18486	0.01045	-0.97908	-1.98191	-2.98705	-3.98046	-4.97719	-5.98261	-6.98267
5.21553	0.01651	-0.97791	-1.9809	-2.98374	-3.98026	-4.97549	-5.9808	-6.98152
5.24621	0.0212	-0.97717	-1.98157	-2.9812	-3.9794	-4.97436	-5.97896	-6.98184
5.27689	0.02412	-0.97682	-1.9834	-2.9796	-3.97788	-4.97378	-5.97731	-6.98341
5.30757	0.02515	-0.97678	-1.98546	-2.9789	-3.97607	-4.97364	-5.97603	-6.98581
5.33825	0.02438	-0.97694	-1.98654	-2.97894	-3.9745	-4.97386	-5.97535	-6.98844
5.36893	0.02206	-0.97723	-1.98576	-2.97958	-3.97363	-4.97435	-5.97548	-6.9905
5.39961	0.01865	-0.97762	-1.98352	-2.98068	-3.97379	-4.97508	-5.97655	-6.99122
5.43029	0.01476	-0.97815	-1.98097	-2.98212	-3.97511	-4.97608	-5.9786	-6.99066
5.46097	0.01126	-0.97889	-1.97901	-2.98383	-3.97752	-4.9774	-5.98153	-6.98967
5.49165	0.00927	-0.97996	-1.97814	-2.98569	-3.98082	-4.97909	-5.98511	-6.98903
5.52233	0.00941	-0.98141	-1.97859	-2.98754	-3.98462	-4.9812	-5.98894	-6.98911
5.55301	0.01073	-0.98329	-1.98034	-2.98919	-3.98842	-4.98371	-5.99252	-6.99001
5.58369	0.01198	-0.98555	-1.98318	-2.99046	-3.99157	-4.9865	-5.99511	-6.99161
5.61437	0.01251	-0.988	-1.98677	-2.99131	-3.99345	-4.98923	-5.99601	-6.99366
5.64505	0.01213	-0.99026	-1.99062	-2.99187	-3.99411	-4.99123	-5.99591	-6.99574
5.67573	0.01092	-0.99159	-1.99409	-2.9923	-3.99458	-4.99146	-5.99618	-6.99708
5.70641	0.00916	-0.99125	-1.99626	-2.99257	-3.99583	-4.98969	-5.99698	-6.99681
5.73709	0.00737	-0.98936	-1.99648	-2.99228	-3.99829	-4.98687	-5.99642	-6.99571
5.76777	0.00642	-0.98676	-1.99625	-2.99091	-3.99765	-4.98385	-5.99316	-6.9946
5.79845	0.00711	-0.98407	-1.9969	-2.98838	-3.99254	-4.9811	-5.98853	-6.99341
5.82913	0.0091	-0.98164	-1.99823	-2.98506	-3.98638	-4.97889	-5.98337	-6.99167
5.85981	0.01166	-0.97964	-1.99625	-2.98146	-3.97956	-4.97733	-5.97824	-6.98899
5.89049	0.01439	-0.97812	-1.99152	-2.978	-3.97249	-4.97645	-5.97362	-6.98531
5.92117	0.01713	-0.97706	-1.98564	-2.97506	-3.9656	-4.97615	-5.9699	-6.98089
5.95185	0.01984	-0.97634	-1.97916	-2.97289	-3.95931	-4.97626	-5.96732	-6.97611
5.98253	0.02248	-0.9758	-1.97258	-2.9716	-3.95401	-4.9765	-5.96599	-6.97138
6.0132	0.02497	-0.97525	-1.9664	-2.97119	-3.94999	-4.97655	-5.96581	-6.96709
6.04388	0.02717	-0.97454	-1.96109	-2.97149	-3.94748	-4.97614	-5.96656	-6.96362
6.07456	0.02893	-0.97358	-1.95705	-2.97224	-3.94659	-4.97514	-5.96786	-6.96126
6.10524	0.03008	-0.97241	-1.9546	-2.97312	-3.94734	-4.9736	-5.96926	-6.96023
6.13592	0.03048	-0.97115	-1.95392	-2.97383	-3.94962	-4.97175	-5.97039	-6.96066
6.1666	0.03004	-0.96998	-1.95507	-2.97425	-3.9532	-4.96989	-5.97108	-6.96254
6.19728	0.02872	-0.96909	-1.95796	-2.97447	-3.95778	-4.96831	-5.97141	-6.96579
6.22796	0.02658	-0.96865	-1.96239	-2.97472	-3.96294	-4.96726	-5.97167	-6.97021
6.25864	0.02375	-0.9688	-1.96802	-2.97529	-3.96819	-4.96691	-5.97218	-6.97552
6.28932	0.02041	-0.96962	-1.97444	-2.97641	-3.97301	-4.96735	-5.97322	-6.9814
6.32	0.01681	-0.97112	-1.98113	-2.97822	-3.97692	-4.96863	-5.97491	-6.98745
6.35068	0.01324	-0.97328	-1.98743	-2.98071	-3.97963	-4.97072	-5.97725	-6.99324
6.38136	0.01003	-0.97602	-1.99222	-2.98375	-3.98123	-4.97351	-5.98013	-6.99753
6.41204	0.00753	-0.97922	-1.99336	-2.98714	-3.98221	-4.97688	-5.98336	-6.99553
6.44272	0.00601	-0.98274	-1.99127	-2.99063	-3.98313	-4.98065	-5.98675	-6.99214
6.4734	0.00542	-0.98641	-1.98895	-2.99392	-3.98446	-4.98465	-5.99007	-6.9897
6.50408	0.00522	-0.99005	-1.98759	-2.99664	-3.98638	-4.98867	-5.99317	-6.98841
6.53476	0.00491	-0.9935	-1.98743	-2.99799	-3.9889	-4.9925	-5.99591	-6.98829
6.56544	0.00424	-0.99658	-1.98842	-2.99746	-3.99187	-4.99594	-5.99813	-6.98921
6.59612	0.00317	-0.99902	-1.99032	-2.99667	-3.99506	-4.99851	-5.99877	-6.99101
6.6268	0.00181	-0.99845	-1.99272	-2.99634	-3.99817	-4.99796	-5.99759	-6.99344
6.65748	0.000480504	-0.99707	-1.99484	-2.99651	-3.99888	-4.99639	-5.99649	-6.99622
6.68816	0.00136	-0.99627	-1.99524	-2.99707	-3.99668	-4.99536	-5.99578	-6.99889
6.71884	0.00266	-0.99608	-1.99366	-2.99786	-3.99516	-4.99498	-5.99553	-6.99784
6.74952	0.00366	-0.99647	-1.9916	-2.99876	-3.99444	-4.99521	-5.9957	-6.99554
6.7802	0.00423	-0.99733	-1.98991	-2.99966	-3.99454	-4.99591	-5.99617	-6.99374
6.81087	0.00432	-0.99853	-1.98894	-2.99947	-3.99537	-4.99689	-5.99654	-6.99259
6.84155	0.00392	-0.99922	-1.98876	-2.99864	-3.99677	-4.99767	-5.99616	-6.99213
6.87223	0.00309	-0.99788	-1.98927	-2.99778	-3.99843	-4.9974	-5.99488	-6.99229
6.90291	0.00197	-0.99621	-1.99015	-2.99686	-3.9987	-4.99617	-5.99315	-6.99289
6.93359	0.00107	-0.9946	-1.99083	-2.99589	-3.9969	-4.99471	-5.99143	-6.9936
6.96427	0.00186	-0.99319	-1.99058	-2.99493	-3.99497	-4.99334	-5.99004	-6.99391
6.99495	0.00338	-0.99207	-1.98908	-2.99408	-3.99315	-4.99225	-5.9892	-6.99341
7.02563	0.00492	-0.99129	-1.98672	-2.9934	-3.99145	-4.99153	-5.98908	-6.99218
7.05631	0.00631	-0.99091	-1.9841	-2.99294	-3.9898	-4.99124	-5.9897	-6.99066
7.08699	0.00747	-0.99091	-1.98169	-2.99268	-3.98813	-4.99139	-5.991	-6.98922
7.11767	0.00837	-0.99129	-1.97981	-2.99252	-3.98639	-4.99197	-5.99272	-6.98814
7.14835	0.009	-0.99199	-1.97869	-2.99233	-3.98467	-4.99294	-5.99429	-6.98759
7.17903	0.00939	-0.99293	-1.97844	-2.99195	-3.98309	-4.9942	-5.99471	-6.98763
7.20971	0.00957	-0.99401	-1.97909	-2.99133	-3.98185	-4.99566	-5.99351	-6.9883
7.24039	0.00957	-0.99504	-1.98062	-2.99056	-3.98113	-4.99708	-5.99159	-6.98956
7.27107	0.00941	-0.9958	-1.98292	-2.98979	-3.98112	-4.9979	-5.98979	-6.99129
7.30175	0.00909	-0.99601	-1.98583	-2.98921	-3.98189	-4.99739	-5.98855	-6.99336
7.33243	0.00862	-0.99563	-1.98915	-2.98898	-3.98347	-4.99614	-5.98811	-6.99553
7.36311	0.00797	-0.99489	-1.99263	-2.98919	-3.98574	-4.99485	-5.98853	-6.99725
7.39379	0.00716	-0.99405	-1.99585	-2.9899	-3.98847	-4.99374	-5.98977	-6.99725
7.42447	0.00621	-0.9933	-1.99734	-2.99107	-3.99114	-4.9929	-5.99162	-6.99577
7.45515	0.00519	-0.99271	-1.99559	-2.99264	-3.99272	-4.9924	-5.99365	-6.99414
7.48583	0.00426	-0.99233	-1.99321	-2.99444	-3.9921	-4.99223	-5.99498	-6.99281
7.51651	0.00366	-0.99217	-1.99117	-2.99623	-3.98977	-4.99239	-5.99449	-6.99192
7.54719	0.00366	-0.99223	-1.98967	-2.99743	-3.98698	-4.99284	-5.99265	-6.99152
7.57787	0.00425	-0.9925	-1.98877	-2.99713	-3.98443	-4.99354	-5.99056	-6.99159
7.60854	0.00511	-0.99292	-1.98843	-2.99587	-3.98247	-4.99442	-5.98883	-6.99209
7.63922	0.00599	-0.99348	-1.9886	-2.99454	-3.98124	-4.99536	-5.9877	-6.99293
7.6699	0.00674	-0.99413	-1.98919	-2.99344	-3.98079	-4.99625	-5.98729	-6.99401
7.70058	0.0073	-0.99483	-1.99011	-2.99264	-3.9811	-4.99689	-5.98756	-6.99522
7.73126	0.00762	-0.99553	-1.99124	-2.99214	-3.98206	-4.99709	-5.98844	-6.99644
7.76194	0.00771	-0.99621	-1.99249	-2.99191	-3.98355	-4.99686	-5.98977	-6.99754
7.79262	0.0076	-0.99684	-1.99377	-2.99192	-3.98542	-4.99642	-5.99138	-6.99843
7.8233	0.00733	-0.99739	-1.99496	-2.99214	-3.9875	-4.99599	-5.99311	-6.99902
7.85398	0.00692	-0.99785	-1.99595	-2.99254	-3.98962	-4.9957	-5.99482	-6.9993
7.88466	0.0064	-0.99816	-1.99656	-2.99313	-3.9916	-4.99562	-5.99644	-6.99938
7.91534	0.00577	-0.99827	-1.99658	-2.99392	-3.9932	-4.99579	-5.99796	-6.99923
7.94602	0.00503	-0.99813	-1.99607	-2.99489	-3.99413	-4.99623	-5.99939	-6.99873
7.9767	0.00416	-0.99773	-1.99523	-2.996	-3.99417	-4.99692	-5.99897	-6.99795
8.00738	0.0032	-0.99714	-1.9943	-2.99714	-3.99349	-4.99784	-5.99747	-6.997
8.03806	0.00225	-0.99643	-1.9934	-2.99793	-3.99247	-4.99896	-5.99596	-6.99599
8.06874	0.00174	-0.99564	-1.99263	-2.99774	-3.99145	-4.99967	-5.99456	-6.995
8.09942	0.00228	-0.99481	-1.99207	-2.99677	-3.99066	-4.99832	-5.9934	-6.99413
8.1301	0.00345	-0.994	-1.99176	-2.99562	-3.99023	-4.99686	-5.99262	-6.99346
8.16078	0.00475	-0.99323	-1.99173	-2.99458	-3.99024	-4.9954	-5.99231	-6.99302
8.19146	0.00597	-0.99255	-1.99199	-2.99376	-3.99073	-4.994	-5.99257	-6.99287
8.22214	0.00698	-0.992	-1.99252	-2.99321	-3.99167	-4.9927	-5.99339	-6.993
8.25282	0.00768	-0.99161	-1.99326	-2.99292	-3.99295	-4.99156	-5.99474	-6.99338
8.2835	0.00803	-0.9914	-1.99413	-2.99288	-3.99435	-4.99062	-5.99646	-6.99396
8.31418	0.008	-0.99138	-1.99499	-2.99302	-3.99542	-4.98992	-5.99811	-6.99462
8.34486	0.0076	-0.99158	-1.99564	-2.99326	-3.99549	-4.98947	-5.99791	-6.99523
8.37554	0.00687	-0.99197	-1.9959	-2.99353	-3.99443	-4.9893	-5.99608	-6.99562
8.40621	0.0059	-0.99256	-1.9957	-2.99379	-3.99287	-4.98939	-5.99419	-6.99566
8.43689	0.0048	-0.99331	-1.99518	-2.99402	-3.9913	-4.98974	-5.99264	-6.99538
8.46757	0.00374	-0.99419	-1.99457	-2.99425	-3.99002	-4.99033	-5.99159	-6.99494
8.49825	0.00294	-0.99517	-1.99402	-2.99452	-3.98916	-4.99111	-5.99112	-6.99452
8.52893	0.00263	-0.99621	-1.99365	-2.9949	-3.98879	-4.99204	-5.99124	-6.99423
8.55961	0.0028	-0.99726	-1.99348	-2.9954	-3.98893	-4.99308	-5.99189	-6.99415
8.59029	0.00314	-0.99829	-1.99351	-2.99603	-3.98953	-4.99415	-5.99295	-6.99431
8.62097	0.00343	-0.99924	-1.99373	-2.99676	-3.99051	-4.99519	-5.99422	-6.9947
8.65165	0.00354	-0.99975	-1.99406	-2.9975	-3.99175	-4.99613	-5.99542	-6.99527
8.68233	0.00349	-0.99907	-1.99443	-2.99812	-3.99309	-4.9969	-5.99616	-6.99594
8.71301	0.00333	-0.99845	-1.99476	-2.99838	-3.99437	-4.99743	-5.9962	-6.99657
8.74369	0.00316	-0.99794	-1.99496	-2.99822	-3.99541	-4.99771	-5.99577	-6.99695
8.77437	0.00307	-0.99753	-1.99502	-2.99786	-3.99606	-4.99779	-5.9953	-6.99691
8.80505	0.00309	-0.99721	-1.99496	-2.99756	-3.99634	-4.99781	-5.99505	-6.99651
8.83573	0.00318	-0.99695	-1.99485	-2.99741	-3.99643	-4.99785	-5.99515	-6.99593
8.86641	0.00325	-0.99671	-1.99477	-2.99748	-3.99651	-4.99795	-5.9956	-6.99537
8.89709	0.00321	-0.99646	-1.99479	-2.99776	-3.9967	-4.99811	-5.99633	-6.99494
8.92777	0.00301	-0.99621	-1.99496	-2.99822	-3.997	-4.99829	-5.9972	-6.99472
8.95845	0.00266	-0.99596	-1.99529	-2.99871	-3.99731	-4.99843	-5.99801	-6.99472
8.98913	0.00219	-0.99571	-1.99579	-2.99891	-3.99745	-4.99845	-5.99837	-6.99495
9.01981	0.00177	-0.99551	-1.99643	-2.99851	-3.99727	-4.99835	-5.99809	-6.9954
9.05049	0.00164	-0.99536	-1.99716	-2.99782	-3.99681	-4.99818	-5.99759	-6.99601
9.08117	0.00196	-0.99531	-1.99788	-2.99713	-3.99625	-4.99799	-5.99719	-6.99674
9.11185	0.00252	-0.99535	-1.99841	-2.99658	-3.99574	-4.99787	-5.99703	-6.99748
9.14253	0.00309	-0.99551	-1.99849	-2.99624	-3.99539	-4.99784	-5.99714	-6.99809
9.17321	0.00353	-0.99578	-1.99811	-2.99616	-3.99524	-4.99792	-5.9975	-6.99835
9.20388	0.00378	-0.99615	-1.99758	-2.99636	-3.99531	-4.99812	-5.99807	-6.99817
9.23456	0.0038	-0.99661	-1.99711	-2.99685	-3.99559	-4.99841	-5.99877	-6.99778
9.26524	0.00359	-0.99715	-1.99679	-2.99759	-3.99602	-4.9987	-5.99936	-6.99741
9.29592	0.0032	-0.99774	-1.99666	-2.99854	-3.99653	-4.9988	-5.99909	-6.99717
9.3266	0.00268	-0.99836	-1.99673	-2.99962	-3.99701	-4.99857	-5.99833	-6.99711
9.35728	0.00217	-0.99897	-1.997	-2.99923	-3.99736	-4.99806	-5.99755	-6.99724
9.38796	0.00187	-0.99953	-1.99743	-2.99812	-3.99748	-4.99744	-5.99683	-6.99753
9.41864	0.00197	-0.99966	-1.99794	-2.99712	-3.99742	-4.99682	-5.99621	-6.99794
9.44932	0.00239	-0.99922	-1.99835	-2.99631	-3.99728	-4.99626	-5.99571	-6.99837
9.48	0.00291	-0.99877	-1.99833	-2.99574	-3.99718	-4.99579	-5.99534	-6.9986
9.51068	0.00336	-0.99838	-1.9978	-2.99546	-3.99718	-4.99545	-5.99513	-6.99844
9.54136	0.00367	-0.99806	-1.99703	-2.99548	-3.9973	-4.99527	-5.99508	-6.99797
9.57204	0.0038	-0.99782	-1.9962	-2.99579	-3.99751	-4.99526	-5.9952	-6.99741
9.60272	0.00374	-0.99765	-1.99544	-2.99634	-3.99774	-4.9954	-5.9955	-6.9969
9.6334	0.00349	-0.99755	-1.9948	-2.99709	-3.99791	-4.9957	-5.99595	-6.9965
9.66408	0.00308	-0.99753	-1.99435	-2.99795	-3.99793	-4.99613	-5.99653	-6.99626
9.69476	0.00254	-0.99757	-1.9941	-2.99882	-3.99779	-4.99665	-5.9972	-6.9962
9.72544	0.00192	-0.99768	-1.99406	-2.99943	-3.99758	-4.99724	-5.99788	-6.99632
9.75612	0.00126	-0.99785	-1.99425	-2.99916	-3.99739	-4.99782	-5.99844	-6.9966
9.7868	0.0006287	-0.99808	-1.99464	-2.99863	-3.99728	-4.99831	-5.9987	-6.99701
9.81748	0.000243461	-0.99835	-1.99519	-2.99824	-3.99731	-4.99861	-5.99858	-6.99752
9.84816	0.000612753	-0.99867	-1.99586	-2.99806	-3.99749	-4.99863	-5.99826	-6.99806
9.87884	0.00101	-0.99899	-1.99658	-2.9981	-3.9978	-4.99847	-5.99794	-6.99856
9.90952	0.0013	-0.99927	-1.99724	-2.99833	-3.99821	-4.99828	-5.99768	-6.99891
9.9402	0.00147	-0.99938	-1.99771	-2.99871	-3.99869	-4.99817	-5.9975	-6.99901
9.97088	0.0015	-0.99923	-1.99787	-2.99919	-3.99915	-4.99817	-5.99734	-6.99893

## Sheet: Figure 3e
	CN	F	Cl	Br	CuHHTP	Me	NH2	NHBu
200	0.97789	0.95916	0.98055	0.93279	0.681181	1	1	1
201	0.97789	0.97189	0.98917	0.92989	0.687052	0.99148	0.99788	0.99636
202	0.9885	0.98846	0.99229	0.9386	0.69015	0.99087	0.99445	0.99471
203	0.99089	1	0.99982	0.94318	0.702544	0.99087	0.9918	0.98149
204	0.99627	0.99467	1	0.94517	0.705316	0.98813	0.98889	0.97554
205	0.99701	0.98935	0.98697	0.94562	0.701402	0.98021	0.98361	0.95901
206	1	0.9855	0.9844	0.95387	0.710698	0.98021	0.97435	0.94942
207	0.99686	0.98402	0.98881	0.95128	0.720646	0.96651	0.96933	0.94876
208	0.99866	0.98491	0.98789	0.95097	0.726843	0.95556	0.95849	0.94893
209	0.987	0.98639	0.98293	0.95112	0.732224	0.94612	0.94844	0.93983
210	0.98476	0.97425	0.98183	0.95326	0.744292	0.93242	0.93575	0.93405
211	0.98506	0.96893	0.97596	0.95234	0.739563	0.91933	0.92782	0.93256
212	0.9767	0.95946	0.96972	0.94929	0.735812	0.90868	0.91433	0.91603
213	0.97162	0.94969	0.96311	0.94578	0.729778	0.89376	0.90375	0.90612
214	0.9746	0.94051	0.95779	0.94517	0.7288	0.88097	0.89291	0.89818
215	0.96699	0.94732	0.95596	0.9415	0.721461	0.87184	0.88207	0.89554
216	0.95967	0.94407	0.95797	0.93753	0.719993	0.85906	0.87255	0.88413
217	0.95548	0.9343	0.95485	0.93402	0.722277	0.84597	0.86198	0.87752
218	0.9516	0.9269	0.95339	0.93127	0.717384	0.83683	0.85431	0.87091
219	0.94443	0.92039	0.95467	0.92836	0.716243	0.82557	0.84638	0.86231
220	0.94084	0.90737	0.94935	0.92439	0.715264	0.81796	0.8432	0.85207
221	0.93845	0.89287	0.94201	0.92012	0.716732	0.80974	0.83659	0.84711
222	0.9386	0.88369	0.94091	0.91813	0.714612	0.80487	0.83316	0.84132
223	0.93756	0.87629	0.93705	0.91752	0.718363	0.79817	0.82813	0.83669
224	0.93875	0.87274	0.93412	0.91676	0.715427	0.79604	0.82549	0.83322
225	0.9389	0.86357	0.9321	0.9163	0.715264	0.79087	0.82099	0.82942
226	0.93995	0.86446	0.93026	0.91782	0.714938	0.78935	0.81835	0.82463
227	0.9395	0.86239	0.92861	0.91844	0.718852	0.78965	0.81571	0.82083
228	0.9398	0.86002	0.92916	0.91889	0.717221	0.78874	0.81412	0.81917
229	0.94114	0.8541	0.92604	0.91981	0.719504	0.78569	0.81015	0.81802
230	0.94413	0.85617	0.92347	0.9218	0.722277	0.78569	0.80804	0.81752
231	0.94562	0.85676	0.92788	0.92393	0.724886	0.7863	0.80645	0.81587
232	0.94831	0.85735	0.92641	0.92561	0.725538	0.78721	0.80619	0.81488
233	0.9516	0.85854	0.92622	0.92729	0.730104	0.78813	0.80539	0.8162
234	0.95459	0.86446	0.92733	0.9302	0.734018	0.79209	0.80724	0.81372
235	0.95608	0.8689	0.93026	0.93111	0.737769	0.79422	0.8083	0.81339
236	0.95892	0.87393	0.92696	0.93279	0.742661	0.79665	0.81015	0.81587
237	0.96101	0.87837	0.92751	0.93478	0.746738	0.79848	0.81121	0.81603
238	0.96385	0.88488	0.92733	0.93707	0.749837	0.80061	0.81227	0.81405
239	0.96579	0.8902	0.92824	0.93845	0.751957	0.80152	0.81412	0.81306
240	0.96923	0.89287	0.92806	0.94135	0.75424	0.80274	0.81253	0.81207
241	0.97236	0.89435	0.92879	0.94287	0.755871	0.80487	0.8128	0.8119
242	0.97535	0.89731	0.92971	0.94455	0.759132	0.8067	0.81253	0.8124
243	0.97744	0.90115	0.93026	0.94654	0.763699	0.80761	0.81227	0.81289
244	0.98058	0.90411	0.93081	0.94868	0.770385	0.80791	0.81174	0.81471
245	0.98192	0.90648	0.93155	0.94975	0.77332	0.80791	0.81174	0.8157
246	0.98252	0.90737	0.93081	0.95143	0.777071	0.8067	0.81121	0.8157
247	0.98402	0.90885	0.92934	0.9528	0.780985	0.80548	0.81042	0.81554
248	0.98581	0.91092	0.92916	0.95418	0.783594	0.80487	0.80883	0.81438
249	0.98521	0.91151	0.92861	0.95448	0.78604	0.80426	0.80724	0.81388
250	0.98521	0.91388	0.92733	0.95601	0.789791	0.80244	0.80592	0.81438
251	0.98656	0.91684	0.92641	0.95769	0.79289	0.8	0.80381	0.81421
252	0.98685	0.92276	0.92843	0.96013	0.795825	0.79848	0.80169	0.81405
253	0.98536	0.92009	0.92659	0.96166	0.799413	0.79726	0.79931	0.81405
254	0.98551	0.92187	0.92604	0.96365	0.802348	0.79635	0.79588	0.81455
255	0.98611	0.92453	0.92476	0.96594	0.805936	0.79635	0.79429	0.81455
256	0.98685	0.92572	0.92494	0.96823	0.810176	0.79756	0.79191	0.81372
257	0.9885	0.92572	0.92109	0.96976	0.814253	0.79787	0.79059	0.81355
258	0.99014	0.92838	0.91999	0.97296	0.818004	0.79878	0.78979	0.81471
259	0.99134	0.93164	0.91907	0.97571	0.822244	0.79878	0.78926	0.81504
260	0.99298	0.93312	0.9165	0.97831	0.826647	0.80061	0.78794	0.81339
261	0.99313	0.93519	0.91503	0.98075	0.829746	0.80152	0.78847	0.81388
262	0.99343	0.93667	0.91705	0.98335	0.83317	0.80335	0.78715	0.81537
263	0.99432	0.93963	0.91668	0.98518	0.836106	0.80426	0.78583	0.81504
264	0.99612	0.9414	0.91558	0.98763	0.838715	0.8067	0.78556	0.81372
265	0.99641	0.9417	0.91705	0.98946	0.841977	0.807	0.78556	0.81421
266	0.99671	0.94466	0.91687	0.99129	0.844912	0.80883	0.78451	0.81256
267	0.99686	0.94703	0.91595	0.99358	0.847358	0.81035	0.78371	0.81058
268	0.99716	0.94791	0.91558	0.99404	0.849478	0.81187	0.78424	0.80909
269	0.99731	0.94555	0.9154	0.99603	0.85013	0.814	0.78371	0.80826
270	0.99791	0.94732	0.9154	0.9974	0.849967	0.81613	0.78292	0.8076
271	0.99866	0.94703	0.91466	0.99847	0.851924	0.81674	0.78213	0.80727
272	0.99821	0.94525	0.91448	0.99832	0.85225	0.81553	0.78054	0.80579
273	0.99761	0.94495	0.91485	1	0.852414	0.81613	0.77895	0.80512
274	0.99641	0.94466	0.91393	0.99954	0.851924	0.81461	0.77684	0.80314
275	0.99417	0.94259	0.91375	0.99954	0.851924	0.81431	0.77578	0.80198
276	0.99343	0.93785	0.91338	0.99893	0.849315	0.81309	0.77314	0.8
277	0.99178	0.93608	0.91375	0.99847	0.848337	0.81279	0.77314	0.79785
278	0.98999	0.93371	0.91411	0.99588	0.846543	0.81126	0.77155	0.7957
279	0.9882	0.93164	0.9143	0.99404	0.845401	0.81035	0.77049	0.79421
280	0.987	0.93134	0.91521	0.9916	0.842955	0.80791	0.76732	0.79107
281	0.98402	0.93016	0.91595	0.98916	0.841813	0.80578	0.76626	0.78893
282	0.98237	0.92513	0.91301	0.98656	0.839856	0.80335	0.76362	0.78711
283	0.97983	0.92128	0.91301	0.98488	0.836921	0.8003	0.76071	0.78512
284	0.97625	0.91625	0.9132	0.98167	0.83529	0.79574	0.75754	0.78281
285	0.97296	0.90974	0.91283	0.97846	0.833333	0.79209	0.75516	0.78083
286	0.96923	0.90559	0.91246	0.97464	0.828604	0.78782	0.75198	0.77901
287	0.96564	0.90027	0.91283	0.96991	0.823875	0.78295	0.74802	0.77686
288	0.96191	0.89612	0.91209	0.96472	0.821429	0.77747	0.74484	0.77339
289	0.95862	0.8905	0.91044	0.95952	0.815558	0.77321	0.74141	0.77058
290	0.95533	0.8831	0.90897	0.95433	0.810013	0.76804	0.73823	0.76777
291	0.95249	0.87689	0.90769	0.94944	0.806915	0.76286	0.73427	0.76479
292	0.94786	0.87274	0.90806	0.94578	0.801696	0.7583	0.73083	0.76231
293	0.94413	0.86742	0.90769	0.94165	0.796314	0.75373	0.7266	0.7605
294	0.9401	0.86268	0.90787	0.93631	0.792564	0.74795	0.72105	0.75785
295	0.93546	0.85765	0.90677	0.93096	0.788324	0.74216	0.71523	0.75421
296	0.93143	0.85232	0.90677	0.92561	0.784573	0.73699	0.71074	0.75025
297	0.928	0.84492	0.9042	0.91935	0.781474	0.73181	0.70545	0.74711
298	0.92426	0.83664	0.90218	0.9137	0.777886	0.72725	0.70122	0.74314
299	0.92082	0.83072	0.90108	0.9082	0.773973	0.72359	0.69619	0.73884
300	0.91784	0.82569	0.90017	0.90377	0.770548	0.71872	0.69011	0.73537
301	0.9138	0.82125	0.89888	0.89812	0.765329	0.71476	0.68377	0.73273
302	0.91052	0.81829	0.89906	0.89262	0.761252	0.70989	0.67715	0.72727
303	0.90693	0.81503	0.89796	0.88819	0.757175	0.70472	0.66975	0.72298
304	0.90424	0.81119	0.89686	0.88346	0.754566	0.70137	0.66182	0.72066
305	0.90111	0.80734	0.89576	0.87903	0.751631	0.69741	0.65494	0.71636
306	0.89901	0.80556	0.89503	0.87552	0.75	0.69346	0.64754	0.71157
307	0.89618	0.80438	0.89429	0.87261	0.749674	0.69072	0.63961	0.70826
308	0.89379	0.8026	0.89393	0.86895	0.748369	0.68767	0.63088	0.70397
309	0.89095	0.80024	0.89374	0.86605	0.747065	0.68371	0.62322	0.69785
310	0.88796	0.79964	0.89429	0.86223	0.746738	0.68097	0.61502	0.69405
311	0.88572	0.7955	0.89227	0.85963	0.746412	0.67915	0.6055	0.69025
312	0.88393	0.79225	0.89154	0.85688	0.745108	0.6761	0.5973	0.68496
313	0.88169	0.79136	0.89062	0.8549	0.746738	0.67519	0.5899	0.68165
314	0.88094	0.78958	0.89044	0.85383	0.748206	0.67336	0.5825	0.67818
315	0.87974	0.7881	0.88989	0.8526	0.749837	0.67306	0.57562	0.67455
316	0.87735	0.78988	0.89026	0.85092	0.752772	0.67275	0.57007	0.67074
317	0.87526	0.78869	0.89007	0.85016	0.75636	0.67093	0.56319	0.66744
318	0.87302	0.78751	0.88934	0.84833	0.759948	0.67032	0.55658	0.66413
319	0.86973	0.79077	0.88879	0.84756	0.76272	0.67215	0.55209	0.66099
320	0.86719	0.79254	0.88897	0.84787	0.767123	0.67154	0.54627	0.65736
321	0.8651	0.79284	0.88934	0.84833	0.771689	0.67093	0.54045	0.65388
322	0.86167	0.79669	0.89007	0.84848	0.775114	0.67275	0.53596	0.65174
323	0.85973	0.79994	0.89154	0.85016	0.779191	0.67367	0.53173	0.64777
324	0.85644	0.79994	0.89007	0.85138	0.783105	0.67306	0.52485	0.64463
325	0.8542	0.80053	0.8897	0.8526	0.786693	0.67489	0.52062	0.64182
326	0.85121	0.8032	0.89081	0.85383	0.79077	0.67671	0.51798	0.63868
327	0.84897	0.80556	0.89007	0.85474	0.795499	0.67763	0.51507	0.63587
328	0.84494	0.80823	0.89062	0.85612	0.798108	0.67976	0.51296	0.63388
329	0.8418	0.81178	0.89301	0.85581	0.802348	0.68219	0.51296	0.63107
330	0.83762	0.81592	0.89448	0.85642	0.807241	0.68432	0.51031	0.62826
331	0.83448	0.81799	0.89429	0.8581	0.811155	0.68584	0.5074	0.62612
332	0.83119	0.81918	0.89503	0.86009	0.816047	0.68919	0.50529	0.62331
333	0.82925	0.82125	0.89466	0.86101	0.822733	0.69011	0.50159	0.62083
334	0.82656	0.82214	0.89466	0.86345	0.830235	0.69163	0.49709	0.61917
335	0.82402	0.82332	0.89539	0.86589	0.83741	0.69346	0.49471	0.61752
336	0.82088	0.82598	0.89705	0.86773	0.844423	0.69528	0.49075	0.61455
337	0.8176	0.82806	0.89888	0.86925	0.851924	0.6968	0.48678	0.61223
338	0.81327	0.83161	0.90072	0.872	0.858774	0.70015	0.48466	0.60893
339	0.80983	0.83427	0.90182	0.87414	0.865297	0.70167	0.48334	0.60562
340	0.80684	0.83753	0.90108	0.87674	0.87182	0.70381	0.48202	0.60264
341	0.80311	0.8396	0.90145	0.87979	0.877202	0.70594	0.4807	0.6005
342	0.80012	0.84344	0.90127	0.88269	0.883235	0.70868	0.4799	0.59752
343	0.79713	0.84463	0.90127	0.8856	0.889596	0.70868	0.47726	0.59521
344	0.79474	0.84818	0.90163	0.88972	0.895956	0.71172	0.47462	0.59289
345	0.79131	0.84936	0.9031	0.89278	0.90199	0.71355	0.47303	0.58992
346	0.78862	0.85084	0.9031	0.89522	0.909165	0.71537	0.47197	0.58661
347	0.78578	0.85173	0.90439	0.89919	0.916504	0.71598	0.47039	0.58496
348	0.78264	0.85232	0.9053	0.90209	0.922048	0.71872	0.46959	0.58231
349	0.7795	0.85351	0.90549	0.90438	0.928408	0.72085	0.4688	0.58033
350	0.77607	0.85203	0.90549	0.90774	0.934605	0.72359	0.46695	0.57752
351	0.77218	0.85292	0.90622	0.9111	0.940476	0.72481	0.46563	0.57537
352	0.77009	0.85499	0.9064	0.91401	0.946184	0.72633	0.46457	0.5719
353	0.76815	0.85647	0.90585	0.91721	0.952381	0.72633	0.46325	0.56975
354	0.76591	0.85558	0.90567	0.92027	0.958578	0.72694	0.46166	0.56711
355	0.76367	0.85943	0.9064	0.92225	0.96347	0.72755	0.4606	0.5643
356	0.76158	0.85972	0.90567	0.92485	0.968037	0.72907	0.45955	0.56248
357	0.75889	0.85913	0.90696	0.92714	0.973092	0.73059	0.45769	0.56083
358	0.75665	0.85795	0.90824	0.92898	0.977658	0.73272	0.4569	0.55835
359	0.75426	0.85854	0.90952	0.93127	0.98092	0.73212	0.45558	0.55686
360	0.75232	0.85587	0.90897	0.93356	0.984834	0.73303	0.45399	0.55537
361	0.75082	0.85203	0.90879	0.93478	0.988258	0.73364	0.45267	0.55355
362	0.74843	0.84729	0.90696	0.93646	0.990541	0.73242	0.45135	0.55124
363	0.74574	0.84344	0.9053	0.93738	0.993314	0.73181	0.44976	0.54975
364	0.74275	0.83989	0.90457	0.93753	0.995271	0.73242	0.44897	0.54694
365	0.74036	0.83634	0.90475	0.93799	0.996902	0.7309	0.44712	0.54545
366	0.73872	0.83338	0.90494	0.93829	0.998532	0.72998	0.44553	0.54231
367	0.73618	0.82924	0.90512	0.93783	1	0.72846	0.44342	0.54033
368	0.73379	0.82628	0.90622	0.93783	0.999837	0.72694	0.4413	0.53785
369	0.73185	0.82184	0.9064	0.93768	0.999674	0.72481	0.43971	0.53554
370	0.72946	0.81711	0.90622	0.93692	0.999511	0.72237	0.43839	0.5324
371	0.72662	0.81296	0.90604	0.93524	0.998695	0.72024	0.43681	0.53025
372	0.72453	0.80764	0.9064	0.93386	0.997228	0.71872	0.43575	0.52711
373	0.72229	0.80112	0.90567	0.93188	0.995434	0.71781	0.43522	0.52413
374	0.7196	0.79432	0.90512	0.92959	0.994292	0.71537	0.4331	0.52116
375	0.71646	0.78751	0.90457	0.92638	0.991846	0.71294	0.43152	0.51851
376	0.71333	0.7807	0.90384	0.92393	0.988748	0.70898	0.4294	0.5162
377	0.71019	0.77538	0.90347	0.92057	0.984997	0.70533	0.42702	0.51405
378	0.70675	0.76916	0.90347	0.91676	0.981246	0.70107	0.42464	0.51124
379	0.70347	0.76176	0.9031	0.91248	0.977006	0.69772	0.42359	0.50876
380	0.70003	0.75377	0.90182	0.90805	0.97244	0.69528	0.422	0.50595
381	0.69659	0.74549	0.90145	0.90393	0.968852	0.69254	0.42094	0.50281
382	0.69256	0.73661	0.90072	0.89919	0.965101	0.6895	0.41962	0.49983
383	0.68868	0.72862	0.8998	0.89461	0.960535	0.68615	0.41803	0.49736
384	0.68494	0.72152	0.89906	0.88987	0.954827	0.68219	0.41592	0.49455
385	0.68121	0.71441	0.89851	0.88529	0.949772	0.67763	0.4138	0.4919
386	0.67673	0.70672	0.89796	0.87979	0.943901	0.67367	0.41222	0.48909
387	0.67299	0.69784	0.89686	0.87475	0.938193	0.67002	0.41089	0.48579
388	0.66866	0.68985	0.89686	0.86941	0.932975	0.66636	0.40904	0.48281
389	0.66418	0.68215	0.89649	0.86421	0.928082	0.6624	0.40693	0.47983
390	0.6594	0.67476	0.89594	0.85917	0.922864	0.65875	0.40428	0.47719
391	0.65521	0.66647	0.89576	0.85413	0.917482	0.65479	0.40137	0.47388
392	0.65028	0.65937	0.89503	0.84863	0.911774	0.65053	0.39926	0.47074
393	0.64565	0.65078	0.89264	0.84329	0.906067	0.64597	0.39662	0.46744
394	0.64087	0.6425	0.89081	0.8387	0.900359	0.64231	0.3945	0.46413
395	0.63579	0.6348	0.8897	0.83321	0.89514	0.63775	0.39265	0.46083
396	0.63042	0.6277	0.88842	0.82817	0.889596	0.63288	0.39027	0.45752
397	0.62519	0.6203	0.88732	0.82236	0.883888	0.62892	0.38763	0.45455
398	0.61951	0.6129	0.88622	0.81671	0.877854	0.62435	0.38525	0.45157
399	0.61398	0.6055	0.8853	0.81045	0.87182	0.61918	0.38287	0.44893
400	0.6086	0.59633	0.88328	0.8048	0.865623	0.61461	0.38049	0.44562
401	0.60308	0.58834	0.88126	0.79869	0.859752	0.60974	0.37758	0.44298
402	0.5974	0.58005	0.87924	0.79303	0.853718	0.60487	0.37573	0.4405
403	0.59187	0.57206	0.87814	0.78754	0.847847	0.6	0.37361	0.43719
404	0.5862	0.56348	0.87704	0.78158	0.841487	0.59543	0.37123	0.43388
405	0.58067	0.5549	0.87612	0.77532	0.834475	0.59056	0.36938	0.43124
406	0.57469	0.54602	0.87447	0.76921	0.827462	0.58569	0.36806	0.4281
407	0.56887	0.53773	0.87319	0.76294	0.819798	0.58052	0.36568	0.42529
408	0.56349	0.52885	0.87135	0.75638	0.811807	0.57504	0.36356	0.42298
409	0.55736	0.51909	0.86897	0.74981	0.803327	0.56986	0.36198	0.42017
410	0.55124	0.5111	0.86603	0.74339	0.794357	0.56377	0.3596	0.41752
411	0.54541	0.50222	0.86383	0.73637	0.784736	0.55738	0.35695	0.4157
412	0.53899	0.49275	0.86144	0.72934	0.77544	0.55221	0.35537	0.41322
413	0.53287	0.48269	0.85796	0.72201	0.765492	0.54642	0.35378	0.41107
414	0.52734	0.47381	0.8552	0.71483	0.755871	0.53973	0.35167	0.40909
415	0.52106	0.46404	0.853	0.70689	0.745434	0.53364	0.35008	0.40678
416	0.51479	0.45339	0.8497	0.69879	0.73516	0.52694	0.34876	0.4043
417	0.50896	0.44481	0.84621	0.6907	0.723744	0.51963	0.34638	0.40182
418	0.50269	0.43534	0.84327	0.68214	0.71184	0.51202	0.34426	0.39934
419	0.49597	0.42527	0.84015	0.67329	0.699609	0.50381	0.34162	0.39653
420	0.48954	0.41669	0.8363	0.66412	0.687704	0.49559	0.33924	0.39455
421	0.48312	0.40752	0.83281	0.65496	0.675473	0.48645	0.33659	0.3919
422	0.47655	0.39686	0.82841	0.64533	0.662916	0.47823	0.33474	0.38992
423	0.46997	0.3871	0.824	0.63602	0.650848	0.46941	0.33263	0.3876
424	0.4637	0.37763	0.81832	0.6267	0.638617	0.46119	0.33104	0.38562
425	0.45728	0.36816	0.81354	0.61769	0.625734	0.45327	0.32946	0.38347
426	0.45085	0.35869	0.80785	0.60868	0.612851	0.44536	0.3276	0.38165
427	0.44443	0.3507	0.80272	0.59951	0.600457	0.43653	0.32575	0.37983
428	0.43845	0.34241	0.79721	0.5905	0.587573	0.42831	0.32364	0.37818
429	0.43188	0.33294	0.79152	0.58149	0.575016	0.42009	0.32232	0.37653
430	0.42575	0.32376	0.78473	0.57278	0.562622	0.41096	0.31994	0.37471
431	0.41963	0.31548	0.77849	0.56423	0.550391	0.40274	0.31809	0.37322
432	0.4135	0.3066	0.77133	0.55598	0.537997	0.39422	0.31623	0.37174
433	0.40693	0.29831	0.76399	0.54773	0.52593	0.3863	0.31438	0.37025
434	0.40096	0.29091	0.75702	0.53948	0.513536	0.37839	0.3128	0.36876
435	0.39438	0.28381	0.75005	0.53124	0.501631	0.37017	0.31095	0.36744
436	0.38856	0.27701	0.74234	0.52314	0.490215	0.36195	0.3091	0.36612
437	0.38258	0.26961	0.73555	0.5155	0.4788	0.35464	0.30777	0.36446
438	0.37676	0.26398	0.72894	0.50802	0.467547	0.34734	0.30566	0.36314
439	0.37048	0.25806	0.72142	0.50099	0.456947	0.34003	0.30381	0.36198
440	0.3648	0.25215	0.71499	0.49427	0.446999	0.33272	0.30222	0.36066
441	0.35898	0.24623	0.70784	0.48816	0.437052	0.32603	0.3009	0.35917
442	0.35285	0.24179	0.70068	0.48205	0.42743	0.31933	0.29931	0.35769
443	0.34688	0.23646	0.69371	0.4764	0.418624	0.31324	0.29825	0.35653
444	0.34135	0.23143	0.6871	0.47106	0.41047	0.30715	0.2964	0.35537
445	0.33567	0.22669	0.68012	0.46586	0.402479	0.30137	0.29455	0.35455
446	0.33	0.22255	0.6737	0.46082	0.39514	0.29619	0.29297	0.35388
447	0.32417	0.21782	0.66728	0.45593	0.388291	0.29041	0.29112	0.35306
448	0.31864	0.21426	0.66141	0.4515	0.381768	0.28524	0.289	0.3519
449	0.31282	0.2116	0.65572	0.44723	0.375408	0.28037	0.28715	0.35107
450	0.30699	0.20894	0.65039	0.4431	0.369374	0.2761	0.28609	0.35008
451	0.30072	0.20657	0.64562	0.43898	0.363992	0.27215	0.28477	0.34909
452	0.29519	0.20361	0.64067	0.43577	0.358611	0.26819	0.28345	0.34843
453	0.28951	0.20124	0.63571	0.43256	0.353881	0.26423	0.28213	0.34793
454	0.28384	0.19917	0.63149	0.42936	0.349315	0.26058	0.28107	0.34711
455	0.27816	0.1974	0.62727	0.42676	0.344912	0.25693	0.27948	0.34628
456	0.27278	0.19592	0.6236	0.42416	0.340672	0.25297	0.27816	0.34562
457	0.2671	0.19562	0.6203	0.42157	0.337247	0.24992	0.27657	0.34479
458	0.26173	0.19473	0.61736	0.41912	0.333659	0.24749	0.27578	0.34397
459	0.2565	0.19355	0.61387	0.41698	0.330887	0.24536	0.27419	0.34347
460	0.25127	0.19296	0.6113	0.41485	0.328278	0.24292	0.27314	0.34298
461	0.24619	0.19266	0.60892	0.41317	0.325506	0.24079	0.27181	0.34248
462	0.24096	0.19207	0.60635	0.41149	0.323059	0.23866	0.27076	0.34198
463	0.23573	0.19207	0.60433	0.40996	0.320939	0.23653	0.26917	0.34182
464	0.2305	0.19207	0.60213	0.40874	0.318656	0.2347	0.26838	0.34165
465	0.22572	0.19177	0.59974	0.40767	0.316862	0.23318	0.26732	0.34149
466	0.22109	0.19177	0.59754	0.40645	0.315068	0.23196	0.26679	0.34149
467	0.21676	0.19148	0.59479	0.40583	0.313438	0.23135	0.266	0.34165
468	0.21243	0.19177	0.5924	0.40507	0.31197	0.23044	0.26547	0.34165
469	0.2081	0.19148	0.58983	0.40461	0.310339	0.22983	0.26494	0.34182
470	0.20391	0.19177	0.58745	0.404	0.309035	0.22922	0.26441	0.34215
471	0.19988	0.19148	0.58488	0.40385	0.30773	0.22831	0.26415	0.34231
472	0.19585	0.19236	0.58304	0.40354	0.306588	0.2274	0.26335	0.34248
473	0.19226	0.19236	0.58084	0.40339	0.305447	0.22679	0.26282	0.34281
474	0.18853	0.19355	0.57956	0.40293	0.304468	0.22618	0.26203	0.34281
475	0.18479	0.19473	0.57845	0.40278	0.30349	0.22557	0.26177	0.34314
476	0.18106	0.19592	0.57772	0.40278	0.303164	0.22557	0.26124	0.34364
477	0.17762	0.1974	0.57735	0.40263	0.302511	0.22557	0.26097	0.34397
478	0.17389	0.19858	0.57754	0.40232	0.301859	0.22588	0.26097	0.3443
479	0.17045	0.20006	0.57809	0.40247	0.301533	0.22527	0.26044	0.34463
480	0.16716	0.20124	0.57882	0.40278	0.301207	0.22527	0.25992	0.34496
481	0.16403	0.20331	0.57919	0.40293	0.301044	0.22496	0.25939	0.34512
482	0.16104	0.2042	0.57992	0.40339	0.301207	0.22496	0.25886	0.34529
483	0.15805	0.20598	0.58066	0.40385	0.301533	0.22496	0.25859	0.34562
484	0.15536	0.20775	0.58121	0.40446	0.301696	0.22496	0.25833	0.34579
485	0.15238	0.20953	0.58194	0.40492	0.302185	0.22496	0.2578	0.34595
486	0.14939	0.21101	0.58359	0.40507	0.302511	0.22557	0.25727	0.34645
487	0.1467	0.21308	0.58488	0.40568	0.302838	0.22618	0.25701	0.34678
488	0.14431	0.21456	0.58598	0.4066	0.303164	0.22618	0.25648	0.34711
489	0.14177	0.21604	0.58745	0.40767	0.303816	0.22709	0.25648	0.34777
490	0.13968	0.21782	0.58855	0.40858	0.304631	0.22831	0.25648	0.3481
491	0.13759	0.2193	0.58947	0.4095	0.305284	0.22892	0.25621	0.34843
492	0.13579	0.22107	0.59075	0.41042	0.305773	0.22953	0.25595	0.34893
493	0.134	0.22314	0.59204	0.41118	0.306588	0.23014	0.25621	0.34959
494	0.13221	0.22551	0.59332	0.41194	0.307404	0.23044	0.25568	0.34975
495	0.13071	0.22758	0.5946	0.41301	0.307567	0.23075	0.25542	0.35008
496	0.12907	0.22965	0.59607	0.41393	0.307893	0.23166	0.25568	0.35058
497	0.12743	0.23202	0.59717	0.41485	0.308708	0.23257	0.25568	0.35091
498	0.12608	0.2335	0.59846	0.41607	0.309524	0.23349	0.25542	0.35124
499	0.12489	0.23616	0.60011	0.41714	0.310339	0.2347	0.25542	0.35174
500	0.12339	0.23764	0.60139	0.41805	0.311807	0.23562	0.25568	0.35223
501	0.12235	0.23912	0.60286	0.41912	0.313112	0.23683	0.25542	0.35256
502	0.12175	0.2409	0.60433	0.4205	0.314253	0.23805	0.25516	0.35306
503	0.12115	0.24327	0.6058	0.42172	0.315232	0.23896	0.25542	0.35355
504	0.12056	0.24475	0.60727	0.42294	0.316047	0.23988	0.25542	0.35388
505	0.12026	0.24741	0.6091	0.42432	0.317025	0.2411	0.25568	0.35471
506	0.12011	0.25037	0.61094	0.42539	0.31833	0.24201	0.25595	0.35521
507	0.11981	0.25303	0.61296	0.42676	0.320124	0.24353	0.25595	0.35587
508	0.11951	0.25511	0.61498	0.42798	0.321755	0.24444	0.25595	0.35669
509	0.11966	0.25718	0.61681	0.42936	0.323712	0.24566	0.25595	0.35736
510	0.11966	0.25984	0.61901	0.43073	0.325179	0.24718	0.25595	0.35769
511	0.11966	0.26221	0.62066	0.43211	0.326484	0.24871	0.25568	0.35835
512	0.11981	0.26428	0.62268	0.43348	0.327789	0.24992	0.25621	0.35884
513	0.11996	0.26635	0.62415	0.43486	0.329256	0.25175	0.25621	0.35934
514	0.12026	0.26931	0.62599	0.43623	0.330561	0.25358	0.25674	0.35983
515	0.12071	0.27168	0.62782	0.43776	0.332355	0.2551	0.25701	0.36033
516	0.12115	0.27345	0.62947	0.43913	0.333986	0.25693	0.25701	0.36066
517	0.1216	0.27553	0.63094	0.44035	0.335943	0.25814	0.25674	0.36132
518	0.1222	0.27878	0.63314	0.44173	0.337736	0.25967	0.25701	0.36165
519	0.1228	0.28056	0.6348	0.44295	0.339693	0.26058	0.25701	0.36231
520	0.12354	0.28233	0.63645	0.44417	0.341324	0.2618	0.25727	0.36314
521	0.12444	0.285	0.6381	0.4457	0.343118	0.26332	0.25754	0.3638
522	0.12563	0.28736	0.63993	0.44738	0.344912	0.26514	0.2578	0.3643
523	0.12668	0.28914	0.64159	0.44906	0.34638	0.26667	0.2578	0.36512
524	0.12803	0.2921	0.64379	0.45074	0.34801	0.26849	0.25806	0.36579
525	0.12922	0.29476	0.64581	0.45212	0.349804	0.27002	0.25806	0.36645
526	0.13056	0.29713	0.64764	0.45364	0.351598	0.27123	0.25833	0.36694
527	0.13176	0.2992	0.64966	0.45517	0.353229	0.27245	0.25806	0.3676
528	0.1334	0.30186	0.65131	0.4567	0.355349	0.27336	0.25806	0.36826
529	0.1346	0.30364	0.6526	0.45838	0.357306	0.27489	0.25806	0.3686
530	0.13594	0.30601	0.65462	0.45991	0.359263	0.27671	0.25833	0.36909
531	0.13759	0.30838	0.657	0.46159	0.36122	0.27854	0.25833	0.36959
532	0.13908	0.31133	0.65884	0.46311	0.363014	0.28067	0.25886	0.37025
533	0.14087	0.3137	0.66122	0.46479	0.364644	0.28311	0.25965	0.37091
534	0.14267	0.31637	0.66342	0.46601	0.366438	0.28524	0.26018	0.37157
535	0.14446	0.31903	0.66563	0.46739	0.368395	0.28676	0.26071	0.37207
536	0.1461	0.32169	0.66728	0.46876	0.370189	0.28889	0.2615	0.37273
537	0.14789	0.32406	0.66911	0.47014	0.372146	0.29072	0.26177	0.37322
538	0.14954	0.32613	0.6704	0.47167	0.374429	0.29193	0.26177	0.37372
539	0.15148	0.3282	0.67205	0.47335	0.376549	0.29346	0.26177	0.37438
540	0.15357	0.33087	0.67333	0.47472	0.378669	0.29498	0.26177	0.37488
541	0.15551	0.33235	0.67517	0.47625	0.380626	0.29619	0.26177	0.37554
542	0.1579	0.33442	0.67682	0.47778	0.382746	0.29772	0.26203	0.37603
543	0.15984	0.33708	0.67847	0.479	0.384214	0.29954	0.2623	0.37653
544	0.16223	0.33856	0.68049	0.48037	0.385845	0.30107	0.2623	0.37719
545	0.16418	0.34034	0.68196	0.48205	0.387312	0.30289	0.2623	0.37785
546	0.16642	0.34241	0.68343	0.48343	0.389106	0.30441	0.2623	0.37835
547	0.16821	0.34448	0.68508	0.48465	0.3909	0.30624	0.26256	0.37884
548	0.17045	0.34596	0.68673	0.48618	0.392857	0.30807	0.26256	0.37917
549	0.17239	0.34803	0.68783	0.48755	0.394977	0.3102	0.26256	0.3795
550	0.17478	0.3504	0.68967	0.48877	0.39726	0.31172	0.26282	0.38
551	0.17702	0.35218	0.69095	0.49015	0.39938	0.31355	0.26309	0.3805
552	0.17927	0.35454	0.69224	0.49168	0.4015	0.31537	0.26309	0.38116
553	0.18166	0.35661	0.69352	0.49305	0.403457	0.31659	0.26335	0.38182
554	0.1839	0.35928	0.69536	0.49412	0.405251	0.31842	0.26388	0.38231
555	0.18599	0.36135	0.69664	0.49534	0.407208	0.31994	0.26388	0.38264
556	0.18838	0.36283	0.69811	0.49687	0.409165	0.32146	0.26415	0.38314
557	0.19107	0.36431	0.69958	0.49809	0.410796	0.3239	0.26467	0.38331
558	0.19331	0.36608	0.70178	0.49916	0.412753	0.32542	0.26494	0.3838
559	0.196	0.36756	0.70306	0.50053	0.41471	0.32694	0.26494	0.3843
560	0.19854	0.36904	0.70472	0.50176	0.416667	0.32846	0.26494	0.38463
561	0.20093	0.37112	0.70674	0.50283	0.418461	0.33059	0.2652	0.38512
562	0.20317	0.37319	0.70894	0.50389	0.420417	0.33181	0.26494	0.38562
563	0.20556	0.37467	0.71059	0.50527	0.422374	0.33364	0.26494	0.38595
564	0.20765	0.37644	0.71224	0.50649	0.423679	0.33516	0.26494	0.38645
565	0.21004	0.37822	0.71408	0.50771	0.425473	0.33668	0.26467	0.38678
566	0.21228	0.3794	0.71573	0.50909	0.427267	0.3379	0.26494	0.38727
567	0.21452	0.37999	0.71683	0.51031	0.429387	0.34003	0.26547	0.38777
568	0.21691	0.38118	0.71793	0.51138	0.431344	0.34155	0.26573	0.3881
569	0.2193	0.38236	0.71903	0.5126	0.433464	0.34307	0.266	0.38843
570	0.22169	0.38355	0.72032	0.51398	0.435421	0.3446	0.26653	0.38893
571	0.22378	0.38532	0.7216	0.51505	0.437215	0.34612	0.26653	0.38926
572	0.22587	0.3868	0.7227	0.51627	0.439008	0.34703	0.26653	0.38942
573	0.22797	0.38858	0.7238	0.51734	0.440802	0.34855	0.26653	0.38975
574	0.22991	0.39065	0.7249	0.51841	0.442596	0.34977	0.26679	0.39025
575	0.23215	0.39183	0.72545	0.51932	0.44439	0.35099	0.26679	0.39074
576	0.23439	0.39361	0.72619	0.52024	0.446347	0.3519	0.26705	0.39107
577	0.23663	0.39538	0.72692	0.52115	0.448141	0.35282	0.26705	0.3914
578	0.23887	0.39716	0.72729	0.52192	0.449772	0.35373	0.26679	0.39157
579	0.24111	0.39834	0.72802	0.52268	0.451892	0.35464	0.26679	0.39157
580	0.24335	0.39982	0.72839	0.52375	0.453686	0.35586	0.26679	0.3919
581	0.24559	0.4016	0.72894	0.52467	0.455153	0.35708	0.26653	0.39223
582	0.24783	0.40308	0.72949	0.52558	0.456947	0.3586	0.26679	0.39273
583	0.25022	0.40426	0.73059	0.52665	0.458415	0.36012	0.26679	0.39306
584	0.25261	0.40574	0.73114	0.52788	0.460372	0.36195	0.26732	0.39339
585	0.25515	0.40722	0.73224	0.52864	0.462003	0.36317	0.26758	0.39355
586	0.25739	0.40781	0.73298	0.5294	0.46396	0.36438	0.26785	0.39372
587	0.25978	0.4087	0.73408	0.53032	0.46559	0.3656	0.26785	0.39388
588	0.26203	0.41018	0.73463	0.53108	0.467547	0.36712	0.26811	0.39421
589	0.26427	0.41077	0.73591	0.53154	0.469015	0.36834	0.26811	0.39455
590	0.26621	0.41166	0.73683	0.53246	0.470483	0.36986	0.26811	0.39455
591	0.26845	0.41284	0.73848	0.53353	0.471787	0.37108	0.26811	0.39504
592	0.27069	0.41344	0.73959	0.53429	0.473255	0.3723	0.26785	0.39504
593	0.27293	0.41432	0.74124	0.53521	0.47456	0.37321	0.26785	0.39504
594	0.27472	0.41492	0.74215	0.53597	0.475375	0.37412	0.26758	0.39488
595	0.27682	0.41551	0.74326	0.53673	0.476517	0.37504	0.26758	0.39504
596	0.27861	0.4164	0.74436	0.53735	0.477821	0.37656	0.26732	0.39471
597	0.2804	0.41699	0.74527	0.53811	0.4788	0.37717	0.26732	0.39455
598	0.28219	0.41728	0.74582	0.53872	0.480267	0.37808	0.26705	0.39455
599	0.28414	0.41817	0.74711	0.53948	0.481735	0.3793	0.26679	0.39471
600	0.28623	0.41847	0.74803	0.5404	0.483366	0.38021	0.26679	0.39471
601	0.28817	0.41906	0.74858	0.54086	0.484671	0.38082	0.26653	0.39488
602	0.29011	0.41965	0.74968	0.54162	0.485975	0.38204	0.26679	0.39504
603	0.2916	0.42024	0.75078	0.54239	0.487117	0.38295	0.26653	0.39504
604	0.29355	0.42083	0.75115	0.543	0.488421	0.38326	0.26653	0.39488
605	0.29504	0.42172	0.75206	0.54346	0.489563	0.38447	0.26626	0.39455
606	0.29683	0.42291	0.75298	0.54452	0.491194	0.38569	0.26626	0.39455
607	0.29848	0.4232	0.75335	0.54498	0.492661	0.3863	0.26653	0.39438
608	0.30027	0.42379	0.75372	0.54575	0.494129	0.38721	0.26626	0.39421
609	0.30176	0.42439	0.75445	0.54636	0.495597	0.38874	0.26626	0.39438
610	0.30326	0.42439	0.755	0.54697	0.496902	0.38935	0.26626	0.39471
611	0.30475	0.42379	0.75537	0.54727	0.49788	0.38995	0.266	0.39471
612	0.30595	0.42439	0.75573	0.54804	0.498858	0.39056	0.26547	0.39488
613	0.30744	0.42498	0.75629	0.54834	0.500163	0.39087	0.2652	0.39488
614	0.30878	0.42527	0.75684	0.54895	0.501305	0.39056	0.26494	0.39455
615	0.31028	0.42587	0.75739	0.54941	0.502283	0.39209	0.26547	0.39438
616	0.31132	0.42646	0.75775	0.54987	0.503425	0.393	0.26547	0.39421
617	0.31267	0.42675	0.75867	0.55033	0.504729	0.39422	0.26573	0.39405
618	0.31371	0.42705	0.75922	0.55079	0.505382	0.39513	0.26573	0.39372
619	0.31491	0.42764	0.75959	0.55094	0.506523	0.39604	0.26573	0.39421
620	0.3161	0.42735	0.75996	0.55124	0.507502	0.39635	0.26547	0.39405
621	0.3173	0.42853	0.76087	0.55201	0.508317	0.39696	0.2652	0.39405
622	0.31834	0.42853	0.76106	0.55231	0.509132	0.39726	0.26494	0.39372
623	0.31954	0.42912	0.76124	0.55293	0.510111	0.39756	0.26467	0.39355
624	0.32059	0.42912	0.76179	0.55354	0.510926	0.39848	0.26467	0.39306
625	0.32148	0.42942	0.76216	0.55415	0.512068	0.39909	0.26415	0.39273
626	0.32238	0.42942	0.76234	0.55399	0.513536	0.39909	0.26362	0.39273
627	0.32327	0.4303	0.76271	0.5543	0.514677	0.39939	0.26335	0.39256
628	0.32432	0.4306	0.76326	0.55445	0.515492	0.4003	0.26309	0.39256
629	0.32522	0.4303	0.76308	0.55461	0.516471	0.4003	0.26309	0.39273
630	0.32626	0.4306	0.76344	0.55476	0.517449	0.40061	0.26309	0.39256
631	0.32716	0.4303	0.76363	0.55506	0.518102	0.40122	0.26309	0.3924
632	0.3282	0.42971	0.76399	0.55552	0.518917	0.40152	0.26282	0.39207
633	0.32865	0.42971	0.76436	0.55583	0.519896	0.40152	0.2623	0.3919
634	0.32925	0.4303	0.76473	0.55583	0.520385	0.40213	0.26177	0.3914
635	0.32985	0.4303	0.76473	0.55629	0.520711	0.40244	0.26124	0.39107
636	0.33074	0.4306	0.76509	0.55674	0.521363	0.40335	0.26097	0.39041
637	0.33134	0.43119	0.76546	0.55674	0.521689	0.40365	0.26044	0.39041
638	0.33224	0.43149	0.76565	0.5569	0.522342	0.40457	0.26044	0.39008
639	0.33284	0.43149	0.76601	0.5572	0.52332	0.40518	0.26044	0.38992
640	0.33343	0.43149	0.76601	0.5572	0.52381	0.40548	0.26018	0.38959
641	0.33358	0.43119	0.76583	0.5569	0.524788	0.40518	0.25965	0.38926
642	0.33403	0.4306	0.76565	0.5572	0.525766	0.40548	0.25965	0.38909
643	0.33463	0.4306	0.76565	0.5572	0.526419	0.40548	0.25939	0.38843
644	0.33493	0.4303	0.76583	0.5572	0.526582	0.40518	0.25859	0.38793
645	0.33493	0.4303	0.76546	0.55751	0.526908	0.40487	0.25859	0.38793
646	0.33537	0.4306	0.76601	0.55781	0.526908	0.40487	0.25806	0.38777
647	0.33567	0.4306	0.7662	0.55781	0.527234	0.40518	0.25833	0.3876
648	0.33567	0.4303	0.76601	0.55827	0.527397	0.40487	0.25727	0.3876
649	0.33582	0.4303	0.76565	0.55842	0.52805	0.40457	0.25727	0.38777
650	0.33597	0.4303	0.7662	0.55812	0.528702	0.40518	0.25701	0.38727
651	0.33597	0.4303	0.7662	0.55812	0.529517	0.40548	0.25727	0.38661
652	0.33597	0.4309	0.76656	0.55812	0.530007	0.40548	0.25648	0.38595
653	0.33627	0.4306	0.7673	0.55797	0.530496	0.40609	0.25674	0.38545
654	0.33612	0.4303	0.76766	0.55781	0.531148	0.40639	0.25595	0.38479
655	0.33642	0.43001	0.76766	0.55781	0.5318	0.40639	0.25595	0.38413
656	0.33672	0.43001	0.76785	0.55735	0.53229	0.40639	0.25516	0.3838
657	0.33672	0.42942	0.7673	0.5572	0.533268	0.40639	0.25489	0.38331
658	0.33642	0.42942	0.76675	0.5572	0.534247	0.40578	0.25436	0.38298
659	0.33657	0.42942	0.76583	0.5572	0.534736	0.40609	0.25383	0.38264
660	0.33642	0.42942	0.76473	0.55705	0.535877	0.40578	0.25331	0.38248
661	0.33627	0.42883	0.76308	0.5572	0.53653	0.40578	0.25304	0.38215
662	0.33627	0.42853	0.76161	0.5572	0.53653	0.40609	0.25331	0.38198
663	0.33627	0.42705	0.75977	0.55705	0.536204	0.4067	0.25331	0.38215
664	0.33627	0.42616	0.75775	0.5569	0.535877	0.40731	0.25357	0.38182
665	0.33627	0.42468	0.75518	0.55705	0.535225	0.40761	0.25331	0.38165
666	0.33612	0.42409	0.75317	0.55705	0.53441	0.40791	0.25304	0.38149
667	0.33582	0.42231	0.75115	0.55705	0.53392	0.40791	0.25225	0.38165
668	0.33537	0.42231	0.74931	0.55644	0.533268	0.40791	0.25172	0.38116
669	0.33523	0.42202	0.74821	0.55659	0.532453	0.40791	0.25145	0.38066
670	0.33448	0.42202	0.74784	0.55629	0.532127	0.407	0.25066	0.38033
671	0.33418	0.42143	0.74766	0.55613	0.5318	0.40731	0.25066	0.38033
672	0.33358	0.42202	0.74784	0.55552	0.531311	0.40731	0.25066	0.37983
673	0.33328	0.42143	0.74821	0.55552	0.531311	0.40731	0.25013	0.3795
674	0.33269	0.42143	0.74894	0.55506	0.531311	0.407	0.2496	0.3795
675	0.33269	0.42083	0.75005	0.55491	0.530985	0.40761	0.2496	0.37884
676	0.33209	0.41995	0.75041	0.55415	0.531311	0.40791	0.24855	0.37802
677	0.33164	0.41965	0.75133	0.55415	0.5318	0.40761	0.24802	0.37785
678	0.33104	0.41935	0.75206	0.55384	0.531637	0.4067	0.24775	0.37736
679	0.3303	0.41876	0.75243	0.55323	0.531963	0.407	0.24775	0.37702
680	0.3294	0.41847	0.75206	0.55262	0.532127	0.40639	0.24749	0.37636
681	0.32865	0.41847	0.75262	0.55262	0.531963	0.40548	0.24749	0.3762
682	0.32805	0.41728	0.75243	0.55216	0.5318	0.40457	0.24722	0.37537
683	0.32731	0.41699	0.7528	0.55201	0.5318	0.40457	0.24669	0.37471
684	0.32671	0.41699	0.75317	0.55201	0.531637	0.40335	0.24643	0.37438
685	0.32626	0.41669	0.75353	0.55155	0.531474	0.40274	0.2459	0.37405
686	0.32581	0.41551	0.75298	0.55094	0.531474	0.40335	0.2459	0.37322
687	0.32522	0.4161	0.75317	0.55063	0.531637	0.40335	0.24511	0.37273
688	0.32462	0.4158	0.75298	0.55002	0.531637	0.40274	0.24458	0.3724
689	0.32447	0.41551	0.75298	0.54941	0.531311	0.40304	0.24484	0.37174
690	0.32357	0.41462	0.75206	0.54911	0.530985	0.40304	0.24458	0.37107
691	0.32298	0.41432	0.75243	0.5485	0.530822	0.40183	0.24405	0.37025
692	0.32178	0.41344	0.7517	0.54773	0.52968	0.40152	0.24379	0.37025
693	0.32118	0.41284	0.75151	0.54743	0.529191	0.40122	0.24299	0.36959
694	0.32029	0.41166	0.75023	0.54697	0.529028	0.40091	0.24246	0.3686
695	0.32014	0.41107	0.75041	0.54651	0.528865	0.4	0.24194	0.3681
696	0.31939	0.41136	0.75005	0.5462	0.528376	0.4	0.24114	0.3681
697	0.31894	0.41166	0.74931	0.5459	0.528213	0.4	0.24088	0.36727
698	0.31805	0.41018	0.74821	0.54529	0.52805	0.39939	0.24088	0.36661
699	0.31685	0.41018	0.74839	0.54422	0.527234	0.39909	0.24035	0.36612
700	0.31566	0.41018	0.74858	0.54361	0.526582	0.39909	0.24035	0.36562
701	0.31446	0.40988	0.74784	0.54315	0.52593	0.39878	0.24035	0.36479
702	0.31341	0.40929	0.74729	0.54239	0.525603	0.39848	0.23956	0.3643
703	0.31267	0.41018	0.74656	0.54162	0.524625	0.39817	0.23876	0.36397
704	0.31192	0.409	0.74491	0.54132	0.524951	0.39817	0.23876	0.36364
705	0.31073	0.40781	0.74307	0.54071	0.523973	0.39787	0.2377	0.36331
706	0.30983	0.40663	0.74215	0.54025	0.52332	0.39787	0.23744	0.36298
707	0.30878	0.40545	0.74124	0.54009	0.522342	0.39696	0.2377	0.36281
708	0.30789	0.40456	0.74014	0.53948	0.522016	0.39696	0.23744	0.36215
709	0.3061	0.40397	0.73885	0.53872	0.520222	0.39604	0.23691	0.36165
710	0.3046	0.40545	0.7383	0.53765	0.51908	0.39513	0.23691	0.36066
711	0.30341	0.40545	0.7361	0.53689	0.517939	0.39422	0.23665	0.35983
712	0.30191	0.40515	0.7339	0.53582	0.516308	0.39361	0.23612	0.35934
713	0.30042	0.40574	0.73188	0.53521	0.51484	0.39239	0.23665	0.35884
714	0.29907	0.40663	0.72968	0.53505	0.513046	0.39178	0.23691	0.35835
715	0.29743	0.40545	0.72637	0.53475	0.511579	0.39087	0.23691	0.35802
716	0.29549	0.40574	0.72399	0.53414	0.509132	0.38995	0.23718	0.35752
717	0.2937	0.40693	0.72123	0.53383	0.507012	0.38904	0.2377	0.35669
718	0.2916	0.40781	0.71848	0.53322	0.504403	0.38782	0.23823	0.3562
719	0.28996	0.4084	0.71518	0.53261	0.50212	0.3863	0.2385	0.3557
720	0.28847	0.40929	0.71206	0.53185	0.499511	0.38508	0.23929	0.35554
721	0.28667	0.40929	0.70912	0.53124	0.49788	0.38356	0.23982	0.35504
722	0.28503	0.40988	0.70618	0.53062	0.49576	0.38234	0.24008	0.35455
723	0.28339	0.41048	0.70343	0.53001	0.493803	0.38143	0.24061	0.35421
724	0.28174	0.41077	0.70068	0.5294	0.492009	0.38021	0.24088	0.35372
725	0.28025	0.41107	0.69829	0.52879	0.490215	0.3793	0.24141	0.35322
726	0.27876	0.41107	0.69609	0.52833	0.488584	0.37839	0.24141	0.35273
727	0.27726	0.41107	0.69407	0.52757	0.487117	0.37778	0.24141	0.35207
728	0.27592	0.41107	0.69224	0.52711	0.485812	0.37686	0.24167	0.35157
729	0.27457	0.41107	0.69059	0.5265	0.484508	0.37656	0.24141	0.35107
730	0.27323	0.41077	0.68912	0.52589	0.483366	0.37595	0.24141	0.35041
731	0.27203	0.41018	0.68783	0.52513	0.482387	0.37565	0.24114	0.34992
732	0.27084	0.40988	0.68673	0.52452	0.481409	0.37534	0.24114	0.34942
733	0.26964	0.40929	0.68581	0.52375	0.480594	0.37504	0.24088	0.34893
734	0.2686	0.4087	0.6849	0.52314	0.479778	0.37504	0.24061	0.34843
735	0.2674	0.40811	0.68416	0.52238	0.479289	0.37473	0.24035	0.34777
736	0.26636	0.40752	0.68343	0.52146	0.478637	0.37473	0.24008	0.34727
737	0.26531	0.40663	0.68288	0.5207	0.478147	0.37473	0.23956	0.34678
738	0.26442	0.40604	0.68214	0.52009	0.477495	0.37473	0.23929	0.34628
739	0.26337	0.40515	0.68141	0.51917	0.477006	0.37443	0.23876	0.34579
740	0.26247	0.40426	0.68086	0.51856	0.476517	0.37443	0.2385	0.34512
741	0.26143	0.40367	0.68031	0.51764	0.475864	0.37443	0.23797	0.34463
742	0.26053	0.40278	0.67976	0.51688	0.475375	0.37443	0.2377	0.34397
743	0.25964	0.40219	0.67921	0.51611	0.474886	0.37412	0.23718	0.34347
744	0.25874	0.4013	0.67847	0.51535	0.47456	0.37412	0.23665	0.34281
745	0.25769	0.40071	0.67792	0.51459	0.47407	0.37382	0.23612	0.34231
746	0.2568	0.39982	0.67737	0.51382	0.473581	0.37412	0.23585	0.34165
747	0.25575	0.39893	0.67664	0.51306	0.473092	0.37412	0.23533	0.34116
748	0.25486	0.39834	0.67609	0.5123	0.472603	0.37412	0.23506	0.34066
749	0.25381	0.39745	0.67554	0.51153	0.472114	0.37382	0.23427	0.34
750	0.25291	0.39686	0.67517	0.51077	0.471624	0.37382	0.23374	0.33934
751	0.25187	0.39598	0.67444	0.51	0.471298	0.37382	0.23321	0.33884
752	0.25097	0.39538	0.67389	0.50909	0.470972	0.37382	0.23268	0.33835
753	0.24993	0.3945	0.67315	0.50832	0.470483	0.37412	0.23215	0.33769
754	0.24888	0.3939	0.6726	0.50756	0.469993	0.37443	0.23189	0.33719
755	0.24783	0.39302	0.67205	0.5068	0.469504	0.37412	0.23109	0.33669
756	0.24679	0.39213	0.67132	0.50603	0.469178	0.37412	0.23057	0.3362
757	0.24589	0.39154	0.67058	0.50527	0.468852	0.37443	0.2303	0.3357
758	0.24485	0.39065	0.67003	0.50435	0.468363	0.37443	0.22977	0.33504
759	0.2438	0.39006	0.66948	0.50344	0.468037	0.37443	0.22924	0.33455
760	0.24275	0.38946	0.66875	0.50267	0.46771	0.37473	0.22898	0.33405
761	0.24171	0.38887	0.66801	0.50191	0.467221	0.37534	0.22871	0.33355
762	0.24066	0.38828	0.66765	0.50115	0.466895	0.37534	0.22819	0.33306
763	0.23962	0.38798	0.66709	0.50038	0.466569	0.37565	0.22792	0.33256
764	0.23857	0.38739	0.66654	0.49962	0.466243	0.37595	0.22739	0.33207
765	0.23768	0.3868	0.66599	0.49885	0.465917	0.37626	0.22713	0.3314
766	0.23663	0.38621	0.66544	0.49809	0.465427	0.37656	0.2266	0.33091
767	0.23558	0.38591	0.66508	0.49733	0.465101	0.37686	0.22634	0.33041
768	0.23454	0.38532	0.66471	0.49656	0.464775	0.37717	0.22581	0.32975
769	0.23364	0.38473	0.66416	0.49595	0.464449	0.37747	0.22528	0.32926
770	0.2326	0.38414	0.66379	0.49519	0.46396	0.37747	0.22475	0.32876
771	0.23155	0.38355	0.66324	0.49458	0.463633	0.37778	0.22422	0.32793
772	0.23065	0.38325	0.66287	0.49381	0.463307	0.37808	0.22369	0.32744
773	0.22961	0.38266	0.66232	0.49305	0.462981	0.37869	0.22343	0.32678
774	0.22871	0.38207	0.66196	0.49229	0.462655	0.379	0.2229	0.32628
775	0.22752	0.38147	0.66159	0.49152	0.462166	0.3793	0.22263	0.32562
776	0.22662	0.38118	0.66104	0.49091	0.46184	0.37991	0.2221	0.32496
777	0.22572	0.38059	0.66067	0.49015	0.461676	0.38052	0.22184	0.32446
778	0.22483	0.38029	0.6603	0.48954	0.461187	0.38082	0.22131	0.3238
779	0.22378	0.3797	0.65994	0.48877	0.461024	0.38143	0.22078	0.32331
780	0.22274	0.3794	0.65957	0.48801	0.460861	0.38174	0.22052	0.32281
781	0.22169	0.37881	0.6592	0.4874	0.460535	0.38234	0.22025	0.32215
782	0.22079	0.37851	0.65884	0.48679	0.460372	0.38295	0.21973	0.32165
783	0.2199	0.37792	0.65847	0.48618	0.460209	0.38356	0.2192	0.32116
784	0.21885	0.37763	0.65829	0.48541	0.460046	0.38387	0.21867	0.32066
785	0.21796	0.37703	0.65792	0.48465	0.459883	0.38447	0.21814	0.32
786	0.21706	0.37674	0.65755	0.48419	0.45972	0.38478	0.21761	0.3195
787	0.21601	0.37644	0.65718	0.48343	0.459556	0.38539	0.21735	0.31917
788	0.21512	0.37585	0.657	0.48282	0.459556	0.386	0.21682	0.31868
789	0.21407	0.37555	0.65663	0.48221	0.459393	0.38661	0.21655	0.31818
790	0.21318	0.37526	0.65645	0.48175	0.45923	0.38721	0.21602	0.31752
791	0.21228	0.37496	0.65627	0.48114	0.45923	0.38782	0.21549	0.31702
792	0.21123	0.37467	0.6559	0.48053	0.459067	0.38843	0.21497	0.31669
793	0.21019	0.37437	0.65553	0.47976	0.458904	0.38935	0.2147	0.31603
794	0.20929	0.37408	0.65553	0.47915	0.458904	0.38995	0.21417	0.31537
795	0.2084	0.37378	0.65517	0.47854	0.458904	0.39056	0.21364	0.31488
796	0.20735	0.37348	0.65498	0.47808	0.458904	0.39148	0.21338	0.31438
797	0.20645	0.37348	0.6548	0.47747	0.458904	0.39209	0.21285	0.31372
798	0.20556	0.37289	0.6548	0.47686	0.459067	0.39269	0.21232	0.31306
799	0.20451	0.3726	0.65443	0.47625	0.459067	0.39361	0.21179	0.3124
800	0.20347	0.3723	0.65443	0.47579	0.459067	0.39422	0.21153	0.3119
801	0.20272	0.372	0.65425	0.47518	0.459067	0.39482	0.211	0.3114
802	0.20182	0.37171	0.65406	0.47472	0.459067	0.39574	0.21047	0.31074
803	0.20093	0.37141	0.65388	0.47411	0.459067	0.39635	0.21021	0.31008
804	0.20003	0.37141	0.65388	0.47365	0.45923	0.39726	0.20968	0.30959
805	0.19898	0.37112	0.65388	0.47319	0.45923	0.39817	0.20941	0.30909
806	0.19809	0.37082	0.6537	0.47258	0.459393	0.39878	0.20915	0.3086
807	0.19704	0.37082	0.6537	0.47197	0.459393	0.3997	0.20862	0.3081
808	0.19615	0.37052	0.65351	0.47167	0.459393	0.40061	0.20809	0.3076
809	0.1954	0.37023	0.65333	0.47121	0.459556	0.40152	0.20783	0.30711
810	0.1945	0.37023	0.65351	0.4706	0.459556	0.40213	0.2073	0.30645
811	0.19361	0.37023	0.65351	0.46999	0.45972	0.40274	0.2065	0.30595
812	0.19271	0.36993	0.65351	0.46938	0.459883	0.40365	0.20624	0.30529
813	0.19181	0.36964	0.65333	0.46907	0.460046	0.40457	0.20571	0.30479
814	0.19092	0.36964	0.65351	0.46861	0.460046	0.40548	0.20492	0.3043
815	0.19002	0.36934	0.65333	0.46815	0.460046	0.40639	0.20465	0.30364
816	0.18927	0.36934	0.65333	0.4677	0.460372	0.407	0.20412	0.30314
817	0.18853	0.36934	0.65351	0.46739	0.460372	0.40791	0.20386	0.30248
818	0.18778	0.36904	0.65351	0.46708	0.460535	0.40852	0.20333	0.30182
819	0.18703	0.36875	0.6537	0.46647	0.460698	0.40944	0.2028	0.30132
820	0.18614	0.36875	0.65388	0.46617	0.460698	0.41005	0.20227	0.30066
821	0.18554	0.36875	0.65388	0.46586	0.460861	0.41096	0.20201	0.30017
822	0.18479	0.36845	0.65406	0.4654	0.461024	0.41187	0.20148	0.2995
823	0.18405	0.36845	0.65406	0.4651	0.461187	0.41248	0.20122	0.29901
824	0.18315	0.36845	0.65443	0.46464	0.461513	0.41339	0.20069	0.29835
825	0.1824	0.36845	0.65462	0.46433	0.461676	0.41461	0.20042	0.29769
826	0.1818	0.36816	0.6548	0.46403	0.46184	0.41522	0.19989	0.29719
827	0.18106	0.36816	0.65498	0.46372	0.462166	0.41583	0.19937	0.29636
828	0.18031	0.36816	0.65517	0.46342	0.462329	0.41674	0.19884	0.29587
829	0.17971	0.36816	0.65535	0.46311	0.462492	0.41766	0.19831	0.29521
830	0.17897	0.36816	0.65553	0.46281	0.462655	0.41857	0.19778	0.29455
831	0.17837	0.36816	0.65572	0.46265	0.462981	0.41979	0.19751	0.29405
832	0.17762	0.36845	0.6559	0.46235	0.463144	0.4207	0.19699	0.29355
833	0.17702	0.36845	0.65608	0.4622	0.46347	0.42131	0.19646	0.29289
834	0.17643	0.36845	0.65627	0.46189	0.46347	0.42222	0.19566	0.29207
835	0.17568	0.36845	0.65645	0.46174	0.463633	0.42283	0.19513	0.29157
836	0.17508	0.36845	0.65663	0.46143	0.46396	0.42344	0.19461	0.29091
837	0.17448	0.36845	0.657	0.46128	0.464123	0.42435	0.19434	0.29025
838	0.17374	0.36845	0.65718	0.46097	0.464286	0.42557	0.19381	0.28975
839	0.17314	0.36845	0.65755	0.46067	0.464449	0.42648	0.19328	0.28909
840	0.17254	0.36845	0.65774	0.46036	0.464612	0.42709	0.19276	0.2886
841	0.17195	0.36845	0.65792	0.46021	0.464938	0.42801	0.19223	0.28793
842	0.17105	0.36845	0.65829	0.45975	0.465101	0.42892	0.1917	0.28727
843	0.17045	0.36845	0.65865	0.45945	0.465427	0.42983	0.19117	0.28661
844	0.16955	0.36816	0.65884	0.45914	0.465753	0.43044	0.1909	0.28595
845	0.16896	0.36816	0.6592	0.45899	0.46608	0.43135	0.19011	0.28529
846	0.16806	0.36845	0.65939	0.45853	0.466569	0.43196	0.18958	0.28463
847	0.16731	0.36845	0.65975	0.45823	0.466895	0.43257	0.18879	0.28413
848	0.16672	0.36845	0.65994	0.45792	0.467221	0.43349	0.188	0.28347
849	0.16612	0.36845	0.66012	0.45777	0.46771	0.43409	0.18773	0.28314
850	0.16537	0.36845	0.6603	0.45746	0.468037	0.4344	0.18694	0.28248
851	0.16463	0.36816	0.66049	0.45746	0.468363	0.43531	0.18614	0.28198
852	0.16388	0.36845	0.66067	0.457	0.468526	0.43623	0.18588	0.28132
853	0.16343	0.36816	0.66104	0.4567	0.468852	0.43683	0.18535	0.28099
854	0.16253	0.36816	0.66122	0.4567	0.469341	0.43775	0.18482	0.28017
855	0.16194	0.36845	0.66141	0.45639	0.469504	0.43896	0.18429	0.27983
856	0.16119	0.36845	0.66196	0.45609	0.46983	0.44018	0.18456	0.27934
857	0.16059	0.36845	0.66232	0.45593	0.46983	0.44049	0.18403	0.27901
858	0.15999	0.36845	0.66251	0.45563	0.470483	0.4414	0.18377	0.27802
859	0.15925	0.36875	0.66306	0.45532	0.470809	0.44231	0.1835	0.27769
860	0.15805	0.36875	0.66361	0.45471	0.471135	0.44323	0.18297	0.27686
861	0.15731	0.36845	0.66398	0.45425	0.471787	0.44444	0.18244	0.27603
862	0.15641	0.36875	0.66453	0.45395	0.472277	0.44597	0.18244	0.27537
863	0.15551	0.36845	0.66508	0.45364	0.472929	0.44658	0.18191	0.27471
864	0.15432	0.36875	0.66544	0.45318	0.473581	0.44749	0.18191	0.27388
865	0.15327	0.36934	0.66618	0.45273	0.474234	0.44871	0.18139	0.27355
866	0.15223	0.36934	0.66654	0.45257	0.475049	0.44992	0.18112	0.27306
867	0.15133	0.36964	0.66709	0.45227	0.475701	0.45053	0.18033	0.27223
868	0.14999	0.36964	0.66765	0.45196	0.476517	0.45205	0.18006	0.2714
869	0.14864	0.37023	0.6682	0.45181	0.477006	0.45327	0.17953	0.27124
870	0.14745	0.37023	0.66875	0.4515	0.477984	0.45449	0.17927	0.27041
871	0.14685	0.3723	0.67132	0.45166	0.479126	0.45571	0.17874	0.26992
872	0.1455	0.37289	0.67205	0.4515	0.479941	0.45662	0.17848	0.26942
873	0.14446	0.37319	0.6726	0.4512	0.48092	0.45784	0.17795	0.26893
874	0.14341	0.37408	0.6737	0.45089	0.481572	0.45875	0.17742	0.26826
875	0.14267	0.37437	0.67425	0.45074	0.482224	0.45997	0.17689	0.26777
876	0.14162	0.37467	0.67499	0.45044	0.482714	0.46088	0.17663	0.26711
877	0.14072	0.37496	0.67554	0.45028	0.483366	0.46149	0.1761	0.26661
878	0.13983	0.37526	0.6759	0.45013	0.484018	0.46271	0.17583	0.26612
879	0.13923	0.37585	0.67645	0.44982	0.484997	0.46362	0.1753	0.26562
880	0.13848	0.37615	0.67682	0.44967	0.485649	0.46484	0.17504	0.26479
881	0.13774	0.37644	0.67737	0.44937	0.486138	0.46575	0.17478	0.2643
882	0.13699	0.37644	0.67792	0.44921	0.486464	0.46667	0.17425	0.2638
883	0.13639	0.37674	0.67829	0.44891	0.487117	0.46758	0.17398	0.26314
884	0.13579	0.37644	0.67866	0.44891	0.487606	0.46849	0.17372	0.26248
885	0.13505	0.37644	0.67902	0.44891	0.488095	0.46941	0.17319	0.26198
886	0.1343	0.37674	0.67939	0.44876	0.488748	0.47002	0.17266	0.26149
887	0.1337	0.37674	0.67976	0.44876	0.489237	0.47093	0.1724	0.26083
888	0.1331	0.37674	0.68031	0.4486	0.489726	0.47184	0.17187	0.26
889	0.13251	0.37703	0.68104	0.4486	0.490215	0.47245	0.1716	0.2595
890	0.13191	0.37733	0.68159	0.4486	0.490378	0.47306	0.17107	0.25901
891	0.13146	0.37733	0.68214	0.44845	0.490705	0.47397	0.17081	0.25835
892	0.13086	0.37763	0.68251	0.44845	0.490868	0.47489	0.17028	0.25802
893	0.13027	0.37763	0.68288	0.44845	0.491357	0.47549	0.16975	0.25736
894	0.12982	0.37792	0.68324	0.4483	0.49152	0.47641	0.16949	0.25702
895	0.12922	0.37822	0.68361	0.44814	0.491683	0.47702	0.16896	0.25653
896	0.12877	0.37851	0.68398	0.44814	0.492335	0.47763	0.16869	0.25603
897	0.12832	0.37881	0.68453	0.44814	0.492661	0.47854	0.16816	0.25537
898	0.12773	0.37911	0.6849	0.44799	0.492988	0.47945	0.1679	0.25488
899	0.12728	0.3794	0.68526	0.44799	0.493477	0.48037	0.16764	0.25455
900	0.12683	0.3794	0.68563	0.44799	0.493966	0.48097	0.16711	0.25405
901	0.12623	0.3797	0.686	0.44784	0.494455	0.48189	0.16684	0.25339
902	0.12578	0.3797	0.68655	0.44769	0.494945	0.4825	0.16658	0.25306
903	0.12534	0.37999	0.6871	0.44769	0.495597	0.48311	0.16631	0.25256
904	0.12489	0.37999	0.68747	0.44769	0.495923	0.48371	0.16579	0.2519
905	0.12444	0.37999	0.68802	0.44769	0.496249	0.48432	0.16552	0.2514
906	0.12384	0.37999	0.68838	0.44753	0.496738	0.48524	0.16526	0.25091
907	0.12339	0.38029	0.68875	0.44738	0.496738	0.48584	0.16499	0.25041
908	0.12295	0.38059	0.6893	0.44723	0.497065	0.48645	0.16473	0.24992
909	0.1225	0.38059	0.68967	0.44723	0.497391	0.48706	0.1642	0.24942
910	0.12205	0.38088	0.69003	0.44723	0.497554	0.48767	0.16393	0.24893
911	0.1216	0.38088	0.69059	0.44723	0.49788	0.48828	0.16367	0.24826
912	0.12115	0.38118	0.69095	0.44707	0.49788	0.48889	0.16341	0.24777
913	0.12071	0.38118	0.69132	0.44707	0.498206	0.4895	0.16288	0.24727
914	0.12041	0.38118	0.6915	0.44692	0.498369	0.49011	0.16261	0.24678
915	0.11996	0.38118	0.69187	0.44692	0.498695	0.49072	0.16235	0.24628
916	0.11951	0.38147	0.69224	0.44692	0.499185	0.49132	0.16208	0.24595
917	0.11906	0.38147	0.69242	0.44677	0.499511	0.49193	0.16182	0.24562
918	0.11861	0.38177	0.69279	0.44677	0.499837	0.49285	0.16155	0.24512
919	0.11831	0.38177	0.69315	0.44677	0.5	0.49346	0.16129	0.24463
920	0.11787	0.38177	0.69352	0.44662	0.500326	0.49406	0.16076	0.24397
921	0.11757	0.38207	0.69389	0.44646	0.500652	0.49467	0.1605	0.24347
922	0.11712	0.38207	0.69426	0.44631	0.500815	0.49528	0.16023	0.24314
923	0.11667	0.38236	0.69462	0.44616	0.501142	0.49589	0.15997	0.24281
924	0.11637	0.38236	0.69499	0.44616	0.501305	0.4965	0.15944	0.24215
925	0.11607	0.38266	0.69536	0.44616	0.501631	0.49711	0.15918	0.24182
926	0.11563	0.38266	0.69572	0.44601	0.501794	0.49772	0.15891	0.24149
927	0.11533	0.38266	0.69609	0.44585	0.501957	0.49802	0.15838	0.24083
928	0.11503	0.38295	0.69646	0.44585	0.501957	0.49863	0.15812	0.24033
929	0.11473	0.38295	0.69664	0.4457	0.502283	0.49893	0.15759	0.23983
930	0.11443	0.38295	0.69701	0.4457	0.502446	0.49954	0.15732	0.23934
931	0.11398	0.38325	0.69719	0.44555	0.502609	0.49985	0.1568	0.23901
932	0.11368	0.38325	0.69738	0.44555	0.502772	0.50046	0.15653	0.23851
933	0.11339	0.38325	0.69756	0.44555	0.503098	0.50076	0.15627	0.23818
934	0.11309	0.38325	0.69793	0.44555	0.503262	0.50107	0.156	0.23769
935	0.11294	0.38325	0.69811	0.44539	0.503425	0.50167	0.15574	0.23719
936	0.11249	0.38325	0.69848	0.44524	0.503588	0.50198	0.15547	0.23669
937	0.11219	0.38325	0.69866	0.44524	0.503751	0.50228	0.15494	0.2362
938	0.11204	0.38325	0.69884	0.44509	0.503914	0.50289	0.15468	0.2357
939	0.11159	0.38325	0.69921	0.44509	0.504077	0.5032	0.15442	0.23521
940	0.11129	0.38325	0.69958	0.44494	0.50424	0.50381	0.15415	0.23471
941	0.11099	0.38325	0.69976	0.44494	0.504403	0.50411	0.15389	0.23438
942	0.1107	0.38325	0.69994	0.44478	0.504729	0.50441	0.15362	0.23388
943	0.1104	0.38325	0.70031	0.44463	0.504892	0.50502	0.15336	0.23355
944	0.11025	0.38325	0.70031	0.44463	0.505055	0.50533	0.15309	0.23289
945	0.10995	0.38325	0.7005	0.44448	0.505219	0.50594	0.15283	0.23256
946	0.10965	0.38325	0.70068	0.44448	0.505382	0.50624	0.15256	0.23207
947	0.1095	0.38325	0.70086	0.44433	0.505545	0.50654	0.1523	0.23157
948	0.1092	0.38325	0.70123	0.44417	0.505545	0.50685	0.15204	0.23124
949	0.1089	0.38325	0.70141	0.44402	0.505708	0.50715	0.15177	0.23074
950	0.10875	0.38325	0.70141	0.44402	0.505871	0.50776	0.15151	0.23041
951	0.10846	0.38295	0.7016	0.44387	0.506034	0.50807	0.15098	0.23008
952	0.10831	0.38325	0.70178	0.44371	0.506034	0.50837	0.15071	0.22959
953	0.10801	0.38295	0.70196	0.44356	0.506197	0.50868	0.15045	0.22926
954	0.10786	0.38295	0.70215	0.44341	0.506197	0.50898	0.15019	0.22876
955	0.10756	0.38295	0.70215	0.44326	0.506197	0.50928	0.14966	0.22843
956	0.10726	0.38295	0.70233	0.4431	0.506197	0.50959	0.14939	0.2281
957	0.10711	0.38295	0.70233	0.44295	0.506034	0.50989	0.14913	0.2276
958	0.10681	0.38295	0.70233	0.4428	0.506034	0.50989	0.14886	0.22727
959	0.10651	0.38295	0.70251	0.4428	0.506197	0.5102	0.1486	0.22678
960	0.10621	0.38295	0.70251	0.44265	0.506034	0.5105	0.14807	0.22645
961	0.10607	0.38266	0.7027	0.44249	0.506034	0.5105	0.14781	0.22595
962	0.10577	0.38295	0.7027	0.44234	0.506034	0.51081	0.14754	0.22545
963	0.10562	0.38266	0.7027	0.44219	0.506034	0.51081	0.14728	0.22512
964	0.10532	0.38266	0.7027	0.44203	0.505871	0.51111	0.14701	0.22479
965	0.10517	0.38266	0.70288	0.44188	0.505871	0.51142	0.14675	0.22446
966	0.10502	0.38266	0.70288	0.44173	0.505871	0.51172	0.14648	0.22413
967	0.10472	0.38266	0.70306	0.44158	0.505708	0.51172	0.14622	0.22364
968	0.10457	0.38236	0.70306	0.44142	0.505708	0.51202	0.14595	0.22331
969	0.10427	0.38236	0.70325	0.44127	0.505708	0.51233	0.14569	0.22298
970	0.10412	0.38236	0.70325	0.44097	0.505545	0.51233	0.14543	0.22264
971	0.10397	0.38236	0.70325	0.44081	0.505382	0.51263	0.14516	0.22231
972	0.10382	0.38236	0.70325	0.44066	0.505219	0.51294	0.1449	0.22198
973	0.10353	0.38236	0.70325	0.44051	0.505219	0.51294	0.1449	0.22165
974	0.10338	0.38236	0.70325	0.44035	0.505055	0.51324	0.14463	0.22116
975	0.10323	0.38207	0.70325	0.44005	0.505055	0.51324	0.14437	0.22083
976	0.10308	0.38207	0.70325	0.4399	0.504892	0.51355	0.1441	0.2205
977	0.10278	0.38207	0.70325	0.43974	0.504729	0.51355	0.14384	0.22017
978	0.10263	0.38177	0.70325	0.43959	0.504729	0.51385	0.14357	0.21967
979	0.10248	0.38177	0.70325	0.43944	0.504566	0.51385	0.14357	0.21934
980	0.10233	0.38177	0.70325	0.43929	0.504566	0.51416	0.14331	0.21901
981	0.10218	0.38147	0.70325	0.43913	0.504403	0.51416	0.14305	0.21868
982	0.10203	0.38147	0.70325	0.43898	0.50424	0.51446	0.14278	0.21835
983	0.10188	0.38118	0.70325	0.43867	0.504077	0.51446	0.14252	0.21802
984	0.10173	0.38118	0.70325	0.43852	0.503914	0.51446	0.14225	0.21769
985	0.10158	0.38088	0.70325	0.43837	0.503914	0.51476	0.14199	0.21719
986	0.10143	0.38059	0.70325	0.43822	0.503588	0.51476	0.14172	0.21686
987	0.10128	0.38059	0.70325	0.43791	0.503425	0.51476	0.14146	0.21653
988	0.10114	0.38029	0.70325	0.43776	0.503425	0.51476	0.1412	0.2162
989	0.10114	0.38029	0.70325	0.43761	0.503262	0.51476	0.14093	0.21587
990	0.10099	0.37999	0.70325	0.4373	0.503098	0.51507	0.14067	0.21554
991	0.10084	0.37999	0.70325	0.43715	0.502935	0.51507	0.14067	0.21504
992	0.10084	0.3797	0.70306	0.43699	0.502772	0.51507	0.14014	0.21488
993	0.10069	0.3797	0.70306	0.43684	0.502446	0.51507	0.13987	0.21438
994	0.10069	0.3794	0.70306	0.43669	0.502446	0.51507	0.13987	0.21405
[truncated: 1,506 more rows]

## Sheet: Figure 4a
	CN			F			Cl			Br			H			Me			NH2			NHBu
[truncated: 274 more rows]

[truncated: 10 more sheets: Figure 4b, Figure 4c, Figure 4d, Figure 4e, Figure 4f, Figure 5d, Figure 6a, Figure 6b, Figure 6c, Figure 6d]
